# Supplementary material for: TRUB1 is the predominant pseudouridine synthase acting on mammalian mRNA via a predictable and conserved code
Source: HighWire-hosted journal article supplement (doi:10.1101/gr.207613.116), 2017-01-10
Supplement: Supplemental_Table_S3.xlsx [file Supplemental_Table_S3.xlsx]

## Sheet: MPRADesignTable
seq	mutgroup	Subgroup	FinalID (combines duplicates)	OriginalID	PseudoUposition_id
ATGGGGTTCGGTATGCGCAAAGCAGCCTTAGTCCATCTCTTGACTCACTTTTCTTTGGTCCTTCAGCCTCACAAGTGCTATATGGGGAATTAAGGCTCCCCGAGACGAT	WT	Pus1	id_uc004dfb.3_3872_WT	id_uc004dfb.3_3872_WT	id_uc004dfb.3_3872
ATGGGGTTCGGTATGCGCGCCCTAACGGTGATTAGCCTTGTGGGGACAGTTCTATTCTTTCTCATTCGGAAACCAGATTCTGAAAGACCACAAGGCTCCCCGAGACGAT	WT	TwoExp	id_uc002jta.2_1529_WT	id_uc002jta.2_1529_WT	id_uc002jta.2_1529
ATGGGGTTCGGTATGCGCGCCCTAACGGTGATTAGCCTTGTGGGGACAGTTCTATTCTTTCTCATTCGGAAACCAGATTCTGAAAGACCACAAGGCTCCCCGAGACGAT	WT	PredictedTRUB1	id_uc002jta.2_1529_WT	id_uc002jta.2_1529_WT	id_uc002jta.2_1529
ATGGGGTTCGGTATGCGCGCCCTAACGGTGATTAGCCTTGTGGGGACAGTTCTATTCTTTCTCATTCGGAAACCAGATTCTGAGTTCTTTAAAGGCTCCCCGAGACGAT	WT	TwoExp	id_uc002jta.2_1529_WT	id_uc002jte.3_1408_WT	id_uc002jte.3_1408
ATGGGGTTCGGTATGCGCGCCCTAACGGTGATTAGCCTTGTGGGGACAGTTCTATTCTTTCTCATTCGGAAACCAGATTCTGAGTTCTTTAAAGGCTCCCCGAGACGAT	WT	PredictedTRUB1	id_uc002jta.2_1529_WT	id_uc002jte.3_1408_WT	id_uc002jte.3_1408
ATGGGGTTCGGTATGCGCTTCGCAGTGGTCGCTTCTTCTCCTTGGATTTGTTAAGGATTCCAAGTAACTCTTATTTGGAGAGAAAACTGCTAAGGCTCCCCGAGACGAT	WT	TwoExp	id_uc001bqa.2_150_WT	id_uc001bqa.2_150_WT	id_uc001bqa.2_150
ATGGGGTTCGGTATGCGCAGGAAAGCAACTGACAATGTACCGGGTTTGGATTCAGTGCAAATACTGCAAGCCCCTTCTGTCCATATCACCCAAGGCTCCCCGAGACGAT	WT	TwoExp	id_uc002izv.2_1113_WT	id_uc002izv.2_1113_WT	id_uc002izv.2_1113
ATGGGGTTCGGTATGCGCAGGGAAGCAACTGACAATGTACCGGGTTTGGATTCAGTGCAAATACTGCAAGCCCCTTCTGTCCACGCATGCAAAGGCTCCCCGAGACGAT	WT	TwoExp	id_uc003vnf.3_1132_WT	id_uc003vnf.3_1132_WT	id_uc003vnf.3_1132
ATGGGGTTCGGTATGCGCGGTGAAATGCTTTTGGATAAACGTAAGCCTATTTTCTGACGTTTCTTAATGCAAACTCTTTGCCTCCCATCTAAAGGCTCCCCGAGACGAT	WT	TwoExp	id_uc003klr.4_2700_WT	id_uc003klr.4_2700_WT	id_uc003klr.4_2700
ATGGGGTTCGGTATGCGCTAGGGCTTTTTCCTGATTTTGGGTATACAAGTTCCAAACTTGCATAATAATTGCTAACGCACTAGATGAGGCTAAGGCTCCCCGAGACGAT	WT	PredictedTRUB1	id_uc004dur.3_4333_WT	id_uc004dur.3_4333_WT	id_uc004dur.3_4333
ATGGGGTTCGGTATGCGCACTCCTTCCCAAGAATTTATAGCACTTAATGTTCAATTCATCAGAATTTTTCAGGTATTAGTCCAAGAAGAGAAAGGCTCCCCGAGACGAT	WT	PredictedTRUB1	id_uc002vdk.2_6128_WT	id_uc002vdk.2_6128_WT	id_uc002vdk.2_6128
ATGGGGTTCGGTATGCGCGGCTTTTAAAGGCAAATCATTCCCACCATCACTTAACGCCGGGATTATACACATTCTAGAAATGAGACATATCAAGGCTCCCCGAGACGAT	WT	TwoExp	id_uc003qng.2_2967_WT	id_uc003qng.2_2967_WT	id_uc003qng.2_2967
ATGGGGTTCGGTATGCGCCTCTTGGAACAAGTCTTGCTTTTCGAACATGGTATAATAGCCTTGTTTGTGTTAGCAAAGTGGAAAGTATGGGAAGGCTCCCCGAGACGAT	WT	TwoExp	id_uc002bww.3_908_WT	id_uc002bww.3_908_WT	id_uc002bww.3_908
ATGGGGTTCGGTATGCGCTAAAGACTCCAACGGAGGGAGCCTGTTGGTGTTAAATTGTTTACATTTCTTTATACAAATAATGTCAAGACGCAAGGCTCCCCGAGACGAT	WT	TwoExp	id_uc002rnl.3_4348_WT	id_uc002rnl.3_4348_WT	id_uc002rnl.3_4348
ATGGGGTTCGGTATGCGCTCCTAGAACTGCAAACCGGGAGAGGATGTAGTTAGATTCTGGCATCCTGCCCCGGCTCTTTGAGGCGTTCCGAAAGGCTCCCCGAGACGAT	WT	TwoExp	id_uc001amk.3_3144_WT	id_uc001amk.3_3144_WT	id_uc001amk.3_3144
ATGGGGTTCGGTATGCGCAAAGAGCAGCTTCAGAGATAATTCCTTGGTTCTATGATCCCTGTTTAACTCCAAATTACAGTCGGGGTGCATTAAGGCTCCCCGAGACGAT	WT	Pus1	id_uc001bou.4_2797_WT	id_uc001bou.4_2797_WT	id_uc001bou.4_2797
ATGGGGTTCGGTATGCGCGTCGCTGTGAAGATCTGGAGAAACAAAACAGATTACTTCATGATCAGATCGAAAAATTAAGTGACATGGTTCGAAGGCTCCCCGAGACGAT	WT	TwoExp	id_uc001grv.3_3770_WT	id_uc001grv.3_3770_WT	id_uc001grv.3_3770
ATGGGGTTCGGTATGCGCTCCTTTCTTCCATCCCCTTGGCCTGCTCCCTGTAGGAAGTCATCCTGCCAACTGATTTAAAAGGGCTCTAACGAAGGCTCCCCGAGACGAT	WT	Pus1	id_uc002ihz.3_2279_WT	id_uc002ihz.3_2279_WT	id_uc002ihz.3_2279
ATGGGGTTCGGTATGCGCGCTTACCAGCTTCTATCAGAATGCTTGAGGGTTCTAAACCCTCAGGGGACCCTGATTCAGTTCTCCAAGCAAAAAGGCTCCCCGAGACGAT	WT	PredictedTRUB1	id_uc001nug.1_821_WT	id_uc001nug.1_821_WT	id_uc001nug.1_821
ATGGGGTTCGGTATGCGCAGCAAGCAGGTTTTAAGGAGAGTGATGTAGGTTTTATTCCTACAAGTGGTCTCAGTGGTGAAAATAGGTATCTAAGGCTCCCCGAGACGAT	WT	TwoExp	id_uc003qez.2_1529_WT	id_uc003qez.2_1529_WT	id_uc003qez.2_1529
ATGGGGTTCGGTATGCGCTAGTGCCCCGAAGCACCCCACGAGGATCTACTTCAGGGAAACAGAAACCACACTGCCGAGGAATGAATGCCTGAAGGCTCCCCGAGACGAT	WT	Pus1	id_uc002rjw.1_1138_WT	id_uc002rjw.1_1138_WT	id_uc002rjw.1_1138
ATGGGGTTCGGTATGCGCGGTGGTGTAGGGCAAAGCTGTTAGAAAGATTGTAGCGTTTTACTCTCCCTGGGCTTTCCTCCGCCCTCGAAGGAAGGCTCCCCGAGACGAT	WT	TwoExp	id_uc002gta.3_1978_WT	id_uc002gta.3_1978_WT	id_uc002gta.3_1978
ATGGGGTTCGGTATGCGCCAGTCTGTCACCTCCCTCCCCGCCACTTTGTGTAGATCCTACCTGGAGGGAATGGCTTTAGGCACGACATGGGAAGGCTCCCCGAGACGAT	WT	Pus1	id_uc002jvw.3_2852_WT	id_uc002jvw.3_2852_WT	id_uc002jvw.3_2852
ATGGGGTTCGGTATGCGCCTCAGGGAGGCAGCAAGTCAGAAGGCCTAGGTTCTAGTCCTAGCTCCATCATTTACCAACTGTGTTTGAAAGAAAGGCTCCCCGAGACGAT	WT	PredictedTRUB1	id_uc004eda.3_2469_WT	id_uc004eda.3_2469_WT	id_uc004eda.3_2469
ATGGGGTTCGGTATGCGCCTCAGGGAGGCAGCAAGTCAGAAGGCCTAGGTTCTAGTCCTAGCTCCATCATTTACCAACTGTGTTTGAAAGAAAGGCTCCCCGAGACGAT	WT	TwoExp	id_uc004eda.3_2469_WT	id_uc004eda.3_2469_WT	id_uc004eda.3_2469
ATGGGGTTCGGTATGCGCCTCAGGGAGGCAGCAAGTCAGAAGGCCTAGGTTCTAGTCCTAGCTCCATCATTTACCAACTGTGTCCGGTATAAAGGCTCCCCGAGACGAT	WT	PredictedTRUB1	id_uc004eda.3_2469_WT	id_uc004eda.3_2469_WT	id_uc004eda.3_2469
ATGGGGTTCGGTATGCGCCTCAGGGAGGCAGCAAGTCAGAAGGCCTAGGTTCTAGTCCTAGCTCCATCATTTACCAACTGTGTCCGGTATAAAGGCTCCCCGAGACGAT	WT	TwoExp	id_uc004eda.3_2469_WT	id_uc004eda.3_2469_WT	id_uc004eda.3_2469
ATGGGGTTCGGTATGCGCACTGTCACTTTCGTCTCCAGCAGAGGGAGCTGTAGGAATAGTGCTTCCAGATGTGGTCTCCCGTGACACGGAAAAGGCTCCCCGAGACGAT	WT	TwoExp	id_uc001amd.3_1136_WT	id_uc001amd.3_1136_WT	id_uc001amd.3_1136
ATGGGGTTCGGTATGCGCACGAAACCATGGTCAGGTGGTCTCTTACCTGTTAAAATCAGGAGCTGACAAAGAAATTCTTACCACTAATGCTAAGGCTCCCCGAGACGAT	WT	TwoExp	id_uc002iso.3_447_WT	id_uc002iso.3_447_WT	id_uc002iso.3_447
ATGGGGTTCGGTATGCGCTGTATTGACAACAGAGAAACAGAACTTCCTACTTTTTGACATGACAACACATCCCCTCACCAATATTGGCGGCAAGGCTCCCCGAGACGAT	WT	Pus1	id_uc003jhp.1_873_WT	id_uc003jhp.1_873_WT	id_uc003jhp.1_873
ATGGGGTTCGGTATGCGCAACAAACAAGATCGAACACTCACTATTGTGGATACTGGAATTGGAATGACCAAGGCTGACTTGATTACGACCCAAGGCTCCCCGAGACGAT	WT	TwoExp	id_uc021xvo.1_100_WT	id_uc021xvo.1_100_WT	id_uc021xvo.1_100
ATGGGGTTCGGTATGCGCGGAAGGGCAGCAGTACACATGACCCCATCCTTTTCTTTGTTTTTACCCCCTGGCTGCCACCACTGGCGAGCCCAAGGCTCCCCGAGACGAT	WT	Pus1	id_uc002sna.1_3247_WT	id_uc002sna.1_3247_WT	id_uc002sna.1_3247
ATGGGGTTCGGTATGCGCTAATTGGTGTGTGGTATAGAAGAAAAACGGGTTCAAACCCCACTTCTGCCACCTACCAGCTATATGGCCTCAAAAGGCTCCCCGAGACGAT	WT	TwoExp	id_uc002exa.3_1354_WT	id_uc002exa.3_1354_WT	id_uc002exa.3_1354
ATGGGGTTCGGTATGCGCTAATTGGTGTGTGGTATAGAAGAAAAACGGGTTCAAACCCCACTTCTGCCACCTACCAGCTATATGGCCTCAAAAGGCTCCCCGAGACGAT	WT	IdentifiedTRUB1	id_uc002exa.3_1354_WT	id_uc002exa.3_1354_WT	id_uc002exa.3_1354
ATGGGGTTCGGTATGCGCTAATTGGTGTGTGGTATAGAAGAAAAACGGGTTCAAACCCCACTTCTGCCACCTACCAGCTATATTCGTAAGAAAGGCTCCCCGAGACGAT	WT	TwoExp	id_uc002exa.3_1354_WT	id_uc002exa.3_1354_WT	id_uc002exa.3_1354
ATGGGGTTCGGTATGCGCTAATTGGTGTGTGGTATAGAAGAAAAACGGGTTCAAACCCCACTTCTGCCACCTACCAGCTATATTCGTAAGAAAGGCTCCCCGAGACGAT	WT	IdentifiedTRUB1	id_uc002exa.3_1354_WT	id_uc002exa.3_1354_WT	id_uc002exa.3_1354
ATGGGGTTCGGTATGCGCCACCTTCCACCAGTGTGTGCGACTCAGCAAGTTTGACTCTGAACGCAGCATCAGCTTTATCCCGCCTGCCTTCAAGGCTCCCCGAGACGAT	WT	Dkc1	id_uc003fmw.3_922_WT	id_uc011bqy.2_777_WT	id_uc011bqy.2_777
ATGGGGTTCGGTATGCGCCACCTTCCACCAGTGTGTGCGACTCAGCAAGTTTGACTCTGAACGCAGCATCAGCTTTATCCCGCCTGCCTTCAAGGCTCCCCGAGACGAT	WT	Dkc1	id_uc003fmw.3_922_WT	id_uc011bqy.2_777_WT	id_uc011bqy.2_777
ATGGGGTTCGGTATGCGCCACCTTCCACCAGTGTGTGCGACTCAGCAAGTTTGACTCTGAACGCAGCATCAGCTTTATCCCGCAGCCGAATAAGGCTCCCCGAGACGAT	WT	Dkc1	id_uc003fmw.3_922_WT	id_uc003fmw.3_922_WT	id_uc003fmw.3_922
ATGGGGTTCGGTATGCGCCACCTTCCACCAGTGTGTGCGACTCAGCAAGTTTGACTCTGAACGCAGCATCAGCTTTATCCCGCAGCCGAATAAGGCTCCCCGAGACGAT	WT	Dkc1	id_uc003fmw.3_922_WT	id_uc003fmw.3_922_WT	id_uc003fmw.3_922
ATGGGGTTCGGTATGCGCGAGCTTGCACTAGCACTCATTTATCTCAGAGTTCAAATCTCTCCCTGCCTTCTACTCAAAGCCTCCCACTAGGAAGGCTCCCCGAGACGAT	WT	PredictedTRUB1	id_uc003kji.2_1248_WT	id_uc003kji.2_1248_WT	id_uc003kji.2_1248
ATGGGGTTCGGTATGCGCCAAGTCTGTATGCGAAGTAGGTAGCAACTGGTTCCAGCCCATCTACCTCGGAGCCATGTTCTCCTTCAAACTTAAGGCTCCCCGAGACGAT	WT	PredictedTRUB1	id_uc004bjg.3_450_WT	id_uc004bjg.3_450_WT	id_uc004bjg.3_450
ATGGGGTTCGGTATGCGCTGAGAGGACAAGTGAGGTCTGCTCAGACCTTGTAGGCTTCTATCAAAACAGCACCCTGCTTGCTCCCAGCTAGAAGGCTCCCCGAGACGAT	WT	TwoExp	id_uc002aga.3_4006_WT	id_uc002aga.3_4006_WT	id_uc002aga.3_4006
ATGGGGTTCGGTATGCGCGTTAATGTGAACTTTGGGGCTTCTGCTTCATTTTTACCCAACAAGCAACAATGCCCCTTGTCCTGGTTTGGCTAAGGCTCCCCGAGACGAT	WT	TwoExp	id_uc010bnp.1_4124_WT	id_uc010bnp.1_4124_WT	id_uc010bnp.1_4124
ATGGGGTTCGGTATGCGCTACGAAATCAGGGTCAAGACAAATCTTCCTATTTTCAAGCTGAAAGAATCTACTGTTAGAAGAAGTCGTAGGAAAGGCTCCCCGAGACGAT	WT	TwoExp	id_uc003psh.3_517_WT	id_uc003psh.3_517_WT	id_uc003psh.3_517
ATGGGGTTCGGTATGCGCAGCAGGCATGCAGCTCTGAGACTCCTGAGTTTTATGCCATTATCAAAAGCATTTTCAAGAATCCCGTCGATCCAAGGCTCCCCGAGACGAT	WT	TwoExp	id_uc002xxl.1_1941_WT	id_uc002xxl.1_1941_WT	id_uc002xxl.1_1941
ATGGGGTTCGGTATGCGCCACTTCTGTCAAGCTTTCCACAGAGAGAATGATACACTAATCATCATCATCAGAAATGAAGATATGCCGGCGTAAGGCTCCCCGAGACGAT	WT	TwoExp	id_uc001iij.3_7307_WT	id_uc001iij.3_7307_WT	id_uc001iij.3_7307
ATGGGGTTCGGTATGCGCCAGACCAACCTGTCAGTGCTGCAAGATGAATTTTTAGATGTGATCTACTGGTTCCGACAGATCATGCGACGAGAAGGCTCCCCGAGACGAT	WT	TwoExp	id_uc002xfo.3_318_WT	id_uc002xfo.3_318_WT	id_uc002xfo.3_318
ATGGGGTTCGGTATGCGCCCACACCAGTGAGAAGCATCAGCACCGTGAACTTGTCTGAGAATAGCAGTGTTGTCATCCCCCCAAAACTCGCAAGGCTCCCCGAGACGAT	WT	Pus1	id_uc003upj.3_1540_WT	id_uc003upj.3_1540_WT	id_uc003upj.3_1540
ATGGGGTTCGGTATGCGCGTTGTCGCCCTCACTCCGTGAGGAGATCCACCTATGATCTCAGGTCCTCAGACCAACCAGCCCAACTTGGGAGAAGGCTCCCCGAGACGAT	WT	TwoExp	id_uc001kra.4_613_WT	id_uc001kra.4_613_WT	id_uc001kra.4_613
ATGGGGTTCGGTATGCGCCCCATGTCTGTGGTCAACAGAGGCGACCCATATCCTCAGGAGGTAAGCGCCACTGTCCAAAAAGTTGTGCGGAAAGGCTCCCCGAGACGAT	WT	Pus1	id_uc002lgp.4_964_WT	id_uc002lgp.4_964_WT	id_uc002lgp.4_964
ATGGGGTTCGGTATGCGCGCGAGCCAGAGGATTGTGCTGGCATCGTGTCTTTCCTGTGCTCTGAAGATGCCAGCTACATCACTTTCGAAAGAAGGCTCCCCGAGACGAT	WT	Pus1	id_uc001wla.3_794_WT	id_uc001wla.3_794_WT	id_uc001wla.3_794
ATGGGGTTCGGTATGCGCGCAGAGGAGCCCGCCAATGAGCTGCCCATGAATGAGATTGAGGCGTGGAAGGCTGCGGAAAAGAATTGCCAGGAAGGCTCCCCGAGACGAT	WT	TwoExp	id_uc002onj.4_695_WT	id_uc002onj.4_695_WT	id_uc002onj.4_695
ATGGGGTTCGGTATGCGCAAAATTCTCAGAAAACCGATGCCAAAAAGCTTTACCCATGGCCCACAGTGCCTACCAGTCAAATTGCAAGCAAAAGGCTCCCCGAGACGAT	WT	Pus1	id_uc002ixi.3_1554_WT	id_uc002ixi.3_1554_WT	id_uc002ixi.3_1554
ATGGGGTTCGGTATGCGCAGAGGGATGAAGAAGAGGGTTTACTGGCCGGTTAGAACCCGTGACTGTATTCTCTCCCTTGGATAGCGTTCGGAAGGCTCCCCGAGACGAT	WT	TwoExp	id_uc003hrt.3_3409_WT	id_uc003hrt.3_3409_WT	id_uc003hrt.3_3409
ATGGGGTTCGGTATGCGCGAGTTCTGGAGCGCCCTGCTTGAGAAGGCCTATGCCAAGGTAAATGGCAGCTACGAGGCCCTGTCAACGGATCAAGGCTCCCCGAGACGAT	WT	TwoExp	id_uc009yqd.2_783_WT	id_uc009yqd.2_783_WT	id_uc009yqd.2_783
ATGGGGTTCGGTATGCGCGTGTGAAGCACTTTATACACCTGTAAGCTCTATTATCAAGTCCTAAATTTTGGAATGATTGTCTCTACGTTCAAAGGCTCCCCGAGACGAT	WT	TwoExp	id_uc002blc.1_562_WT	id_uc002blc.1_562_WT	id_uc002blc.1_562
ATGGGGTTCGGTATGCGCAAAAACCACCCTTCTCTGAGATGCCACGAAGATTTACCACTCTTCCTGCGGTGTTTCACTGTTGGATCACGAGAAGGCTCCCCGAGACGAT	WT	Pus1	id_uc001zff.3_2248_WT	id_uc001zff.3_2248_WT	id_uc001zff.3_2248
ATGGGGTTCGGTATGCGCGGCCCAGCTCCCCTCCGTGGGACAGGAACAGTTCTATTCTATTCTGGCAGCAAATGATGACATGGCTCCCTGAAAGGCTCCCCGAGACGAT	WT	TwoExp	id_uc001dxm.2_1099_WT	id_uc001dxm.2_1099_WT	id_uc001dxm.2_1099
ATGGGGTTCGGTATGCGCCACAAGAAGAAACGCCTGGTGCAGAGCCCCAATTCCTACTTCATGGATGTGAAATGCCCAGGATGACCTTAAGAAGGCTCCCCGAGACGAT	WT	TwoExp	id_uc001fdv.3_122_WT	id_uc001fdv.3_122_WT	id_uc001fdv.3_122
ATGGGGTTCGGTATGCGCATCTGTGTCATACACCATCCTTACCCCATTGTTCAATCCAATGATTTATAGTCTGAGAAATAAGGCTCACGAGAAGGCTCCCCGAGACGAT	WT	PredictedTRUB1	id_uc010pij.2_855_WT	id_uc010pij.2_855_WT	id_uc010pij.2_855
ATGGGGTTCGGTATGCGCATCAGTATCCTACACTATTATAACTCCATTGTTCAACCCAATGATTTATAGCTTGAGAAATAAAGTTCTGCAAAAGGCTCCCCGAGACGAT	WT	PredictedTRUB1	id_uc010pii.2_855_WT	id_uc010pii.2_855_WT	id_uc010pii.2_855
ATGGGGTTCGGTATGCGCACCGAAAACTCCACCGTAGCCCTTGCCAAAGTTCGATCCTTTGGTACAGAAGACAGACCGACAGAACAGGAGTAAGGCTCCCCGAGACGAT	WT	IdentifiedTRUB1	id_uc002nva.4_320_WT	id_uc002nva.4_320_WT	id_uc002nva.4_320
ATGGGGTTCGGTATGCGCACCGAAAACTCCACCGTAGCCCTTGCCAAAGTTCGATCCTTTGGTACAGAAGACAGACCGACAGAACAGGAGTAAGGCTCCCCGAGACGAT	WT	TwoExp	id_uc002nva.4_320_WT	id_uc002nva.4_320_WT	id_uc002nva.4_320
ATGGGGTTCGGTATGCGCACCGAAAACTCCACCGTAGCCCTTGCCAAAGTTCGATCCTTTGGTACAGAAGACAGACCGACAGACGTCGACTAAGGCTCCCCGAGACGAT	WT	IdentifiedTRUB1	id_uc002nva.4_320_WT	id_uc002nva.4_320_WT	id_uc002nva.4_320
ATGGGGTTCGGTATGCGCACCGAAAACTCCACCGTAGCCCTTGCCAAAGTTCGATCCTTTGGTACAGAAGACAGACCGACAGACGTCGACTAAGGCTCCCCGAGACGAT	WT	TwoExp	id_uc002nva.4_320_WT	id_uc002nva.4_320_WT	id_uc002nva.4_320
ATGGGGTTCGGTATGCGCTTTGTAGAGGACACGCAGGAGAAAGAAGGTATTCTGCCTGAGAGAGCTGAAGAGGCAAAGCTAAATTACAGCCAAGGCTCCCCGAGACGAT	WT	TwoExp	id_uc001evb.3_98_WT	id_uc001evb.3_98_WT	id_uc001evb.3_98
ATGGGGTTCGGTATGCGCTCCTCTCAAGCTTGGCGTTTGTTTGGTGGGGTTACACGCGGGTTCAACATGCGTATCGAAAAGTGAGCCATTGAAGGCTCCCCGAGACGAT	WT	TwoExp	id_uc002acn.3_129_WT	id_uc002acn.3_129_WT	id_uc002acn.3_129
ATGGGGTTCGGTATGCGCGTTTGTTCCTGTGCCTTGGCGAGTCGCCGGCCTGCTGGGAACGGGACTTCTAAAAGGAACTATGTAAGCTTTGAAGGCTCCCCGAGACGAT	WT	CTGsites	id_uc003fys.3_81_WT	id_uc003fys.3_81_WT	id_uc003fys.3_81
ATGGGGTTCGGTATGCGCGTTTGTTCCTGTGCCTTGGCGAGTCGCCGGCCTGCTGGGAACGGGACTTCTAAAAGGAACTATGTGGCCTGATAAGGCTCCCCGAGACGAT	WT	CTGsites	id_uc003fys.3_81_WT	id_uc003fys.3_81_WT	id_uc003fys.3_81
ATGGGGTTCGGTATGCGCTGTGCATCACCAATGAATGAATCAGGTTGAGTTCCATCCTCTTCACCTAAAACTTCCTTAAGTGACTCTCGGCAAGGCTCCCCGAGACGAT	WT	PredictedTRUB1	id_uc003qdz.3_685_WT	id_uc003qdz.3_685_WT	id_uc003qdz.3_685
ATGGGGTTCGGTATGCGCAAACGTTTTGGCAAAATGTTATGGTGGTGATATTACCCGAAAAATGAAGCTTTTGAAGAGACAAGCACCGTAAAAGGCTCCCCGAGACGAT	WT	Pus1	id_uc003gww.4_2094_WT	id_uc003gww.4_2094_WT	id_uc003gww.4_2094
ATGGGGTTCGGTATGCGCCAAGCGGTTCTGTTCACTAAATTTTTCTCCTGTAAGCTTTGAATGGAAACTTCTGTATCACATGACTGTTATTAAGGCTCCCCGAGACGAT	WT	TwoExp	id_uc003xsk.4_2982_WT	id_uc003xsk.4_2982_WT	id_uc003xsk.4_2982
ATGGGGTTCGGTATGCGCGAGAGACTGTTGGAGCCTCTTGTTACACAGGTTACAACCCTTGTAAACACCAATAGTAAAGGGCCGAGTACGGAAGGCTCCCCGAGACGAT	WT	TwoExp	id_uc003ldh.3_204_WT	id_uc003ldh.3_204_WT	id_uc003ldh.3_204
ATGGGGTTCGGTATGCGCAAGCAGGGACCACATTGCCATTTATTCATTGTTCCAGGCAATGCATTTGTCCAAACCCCTCTGGCTATATGCCAAGGCTCCCCGAGACGAT	WT	PredictedTRUB1	id_uc003xrh.1_4206_WT	id_uc003xrh.1_4206_WT	id_uc003xrh.1_4206
ATGGGGTTCGGTATGCGCAAAGTAGCCTGAAAGCCAGTGGTGCAACCCCATCCCCACAACCTTCACCACCTCTAGCACCTCCAAAAGCACTAAGGCTCCCCGAGACGAT	WT	TwoExp	id_uc002ikk.3_700_WT	id_uc002ikk.3_700_WT	id_uc002ikk.3_700
ATGGGGTTCGGTATGCGCAAAGTAGCCTGAAAGCCAGTGGTGCAACCCCATCCCCACAACCTTCACCACCTCTAGCACCTCCAAAAGCACTAAGGCTCCCCGAGACGAT	WT	TwoExp	id_uc002ikk.3_700_WT	id_uc002ikk.3_700_WT	id_uc002ikk.3_700
ATGGGGTTCGGTATGCGCAAAGTAGCCTGAAAGCCAGTGGTGCAACCCCATCCCCACAACCTTCACCACCTCTAGCACCTCCACGTGAACCAAGGCTCCCCGAGACGAT	WT	TwoExp	id_uc002ikk.3_700_WT	id_uc002iks.2_700_WT	id_uc002iks.2_700
ATGGGGTTCGGTATGCGCAAAGTAGCCTGAAAGCCAGTGGTGCAACCCCATCCCCACAACCTTCACCACCTCTAGCACCTCCACGTGAACCAAGGCTCCCCGAGACGAT	WT	TwoExp	id_uc002ikk.3_700_WT	id_uc002iks.2_700_WT	id_uc002iks.2_700
ATGGGGTTCGGTATGCGCGTGATAATTTTGTATTTTCACAAAAAAAAAGTTAAACTCTTCTTTTCTTTTTATTATAATGACCAAGTATTCCAAGGCTCCCCGAGACGAT	WT	TwoExp	id_uc001pha.3_3490_WT	id_uc001pha.3_3490_WT	id_uc001pha.3_3490
ATGGGGTTCGGTATGCGCTCATTTTTCTATTGTCCTGACCGCCAAAGATTTTAACCCAGAGAAGTATGCTGCCTTCACTAGGAACAGAAGCAAGGCTCCCCGAGACGAT	WT	Pus1	id_uc010nrh.3_509_WT	id_uc010nrh.3_509_WT	id_uc010nrh.3_509
ATGGGGTTCGGTATGCGCTTAGAGCACAGGCTGCAAAGCCCTGCATTCTTTTCTTTGATGAATTTGAATCCATTGCTCCTCGGCAAGACCCAAGGCTCCCCGAGACGAT	WT	TwoExp	id_uc003uly.3_2909_WT	id_uc003uly.3_2909_WT	id_uc003uly.3_2909
ATGGGGTTCGGTATGCGCCTGCAGCGCTGGTGGAGGAGGAAACTCGCAGATACCGACCTACTAAGAACTACCTGAGCTACCTGCTCTAAACAAGGCTCCCCGAGACGAT	WT	TwoExp	id_uc001eez.3_2937_WT	id_uc001eez.3_2937_WT	id_uc001eez.3_2937
ATGGGGTTCGGTATGCGCTGTTCAAAGGTTGCCATGTGGCTGGCAGTGGTTCAAGCCCACATTTGACACTGCTGCTCTAGAGGTTTCCGCCAAGGCTCCCCGAGACGAT	WT	PredictedTRUB1	id_uc004dwq.3_2510_WT	id_uc004dwq.3_2510_WT	id_uc004dwq.3_2510
ATGGGGTTCGGTATGCGCTCTAGAGATCAGGTTCTGGACAATGCTGCAGTTCAATTCTGTGCCCGCAAAGTCTCTGCTGTTTCGTCTCTCTAAGGCTCCCCGAGACGAT	WT	TwoExp	id_uc002huj.1_1330_WT	id_uc002huj.1_1330_WT	id_uc002huj.1_1330
ATGGGGTTCGGTATGCGCTCTAGAGATCAGGTTCTGGACAATGCTGCAGTTCAATTCTGTGCCCGCAAAGTCTCTGCTGTTTCGTCTCTCTAAGGCTCCCCGAGACGAT	WT	IdentifiedTRUB1	id_uc002huj.1_1330_WT	id_uc002huj.1_1330_WT	id_uc002huj.1_1330
ATGGGGTTCGGTATGCGCTCTAGAGATCAGGTTCTGGACAATGCTGCAGTTCAATTCTGTGCCCGCAAAGTCTCTGCTGTTTCAGCAATTCAAGGCTCCCCGAGACGAT	WT	TwoExp	id_uc002huj.1_1330_WT	id_uc002huj.1_1330_WT	id_uc002huj.1_1330
ATGGGGTTCGGTATGCGCTCTAGAGATCAGGTTCTGGACAATGCTGCAGTTCAATTCTGTGCCCGCAAAGTCTCTGCTGTTTCAGCAATTCAAGGCTCCCCGAGACGAT	WT	IdentifiedTRUB1	id_uc002huj.1_1330_WT	id_uc002huj.1_1330_WT	id_uc002huj.1_1330
ATGGGGTTCGGTATGCGCGCCGCTGTAAAATTTACCACAAACTTAGTGACTTAACACAAATTTATTGCAATTCTGTAGGCTGGTTCGGCAGAAGGCTCCCCGAGACGAT	WT	TwoExp	id_uc011lkt.2_2768_WT	id_uc011lkt.2_2768_WT	id_uc011lkt.2_2768
ATGGGGTTCGGTATGCGCTCTTTGATGACATTCAAAGAAAGGTATATGAATTGATGCTACGAGATGAAAGATTTTATCCTTCCGTGCCGGCAAGGCTCCCCGAGACGAT	WT	Pus1	id_uc003stv.3_1688_WT	id_uc003stv.3_1688_WT	id_uc003stv.3_1688
ATGGGGTTCGGTATGCGCAGATGAGTTCATACTATGATTTAGAAAGTGGTTCAATTCCCCTGTTGGCATATGATTATTTTTACGGCGCATTAAGGCTCCCCGAGACGAT	WT	TwoExp	id_uc003cfa.1_1607_WT	id_uc003cfa.1_1607_WT	id_uc003cfa.1_1607
ATGGGGTTCGGTATGCGCACTACTGTGGCCAATGCGTTTTCTTCTTTATATTCTCAAGTCTCCGGGACGCCCCTGCAGAGAATTCTCGTGTAAGGCTCCCCGAGACGAT	WT	TwoExp	id_uc002uoi.3_1094_WT	id_uc002uoi.3_1094_WT	id_uc002uoi.3_1094
ATGGGGTTCGGTATGCGCTTCTTTTTCAGTTTTACCTCTTCTCTCTCAGTTCTACACTGATACACTTGAAGGACCATTTACTGCAGGAATCAAGGCTCCCCGAGACGAT	WT	PredictedTRUB1	id_uc003kqj.4_4295_WT	id_uc003kqj.4_4295_WT	id_uc003kqj.4_4295
ATGGGGTTCGGTATGCGCCCAGGCAGCCTTCCGGGAGCCATGGCTTCTTGTGGTTACTGACCCCAGGGCTGACCACCAGCCTCCCCTCTAGAAGGCTCCCCGAGACGAT	WT	TwoExp	id_uc011lsj.1_469_WT	id_uc011lsj.1_469_WT	id_uc011lsj.1_469
ATGGGGTTCGGTATGCGCCAAATAACAGACCAGCTTCTTTTTCTTGCAGTTACAGATGTAATTTCCTTTTTGTTGTCAAACATGCCGCCTCAAGGCTCCCCGAGACGAT	WT	TwoExp	id_uc003ihu.1_4023_WT	id_uc003ihu.1_4023_WT	id_uc003ihu.1_4023
ATGGGGTTCGGTATGCGCCAGCTGTTACAGCCCTCAACAGTGAAAGTAACTTTGCCCGAGCATATGCACAGGGTATCAGCCGAAGACTTTTAAGGCTCCCCGAGACGAT	WT	Dkc1	id_uc001skr.1_815_WT	id_uc001skr.1_815_WT	id_uc001skr.1_815
ATGGGGTTCGGTATGCGCCACTCTTGTAGCATGGACACTGCTAGCTGGGTTCAAATCCCAGCTCCAGCAGTTGCCAGCGCTGGCAGCGCTGAAGGCTCCCCGAGACGAT	WT	PredictedTRUB1	id_uc003zxl.3_4326_WT	id_uc003zxl.3_4326_WT	id_uc003zxl.3_4326
ATGGGGTTCGGTATGCGCCACTCTTGTAGCATGGACACTGCTAGCTGGGTTCAAATCCCAGCTCCAGCAGTTGCCAGCGCTGGCAGCGCTGAAGGCTCCCCGAGACGAT	WT	TwoExp	id_uc003zxl.3_4326_WT	id_uc003zxl.3_4326_WT	id_uc003zxl.3_4326
ATGGGGTTCGGTATGCGCCACTCTTGTAGCATGGACACTGCTAGCTGGGTTCAAATCCCAGCTCCAGCAGTTGCCAGCGCTGGAGAGTCATAAGGCTCCCCGAGACGAT	WT	PredictedTRUB1	id_uc003zxl.3_4326_WT	id_uc003zxl.3_4326_WT	id_uc003zxl.3_4326
ATGGGGTTCGGTATGCGCCACTCTTGTAGCATGGACACTGCTAGCTGGGTTCAAATCCCAGCTCCAGCAGTTGCCAGCGCTGGAGAGTCATAAGGCTCCCCGAGACGAT	WT	TwoExp	id_uc003zxl.3_4326_WT	id_uc003zxl.3_4326_WT	id_uc003zxl.3_4326
ATGGGGTTCGGTATGCGCTAAGTAGAATTAATTCCTGTCACTCTCCTAGGTGTCATTCCACACATCCACAAATCTCTGATTGGCCCGATAAAAGGCTCCCCGAGACGAT	WT	TwoExp	id_uc003hvn.1_1408_WT	id_uc003hvn.1_1408_WT	id_uc003hvn.1_1408
ATGGGGTTCGGTATGCGCAGAATTGTAGAAAATGACAAATCCAAAATTCTTACAACTATAGAAGACCTTGACCAGAAGAAAAATTTGGAAAAAGGCTCCCCGAGACGAT	WT	TwoExp	id_uc004bbw.3_3328_WT	id_uc004bbw.3_3328_WT	id_uc004bbw.3_3328
ATGGGGTTCGGTATGCGCCCATTGCCAGTTATTAAAGAGCCTAATCAATATGTTCAAACTATACTAAAACACCTACAGAATCTAGGTCTTGAAGGCTCCCCGAGACGAT	WT	Pus1	id_uc002xiw.3_603_WT	id_uc002xiw.3_603_WT	id_uc002xiw.3_603
ATGGGGTTCGGTATGCGCGTGAGCACAAAAAAAATACCCACCGTGAATCGTATTACTCCCAAAACTCAGGGCACTAACCAAATCAGGTGCCAAGGCTCCCCGAGACGAT	WT	TwoExp	id_uc002nkx.2_927_WT	id_uc002nkx.2_927_WT	id_uc002nkx.2_927
ATGGGGTTCGGTATGCGCCATCTCCTGCCTCCTAATAGCTTTGAGGGAGCTGAAGAAGAAGCTGTTCAAACGCCGGCGGGTGTTACTGATAAAGGCTCCCCGAGACGAT	WT	CTGsites	id_uc001nuf.3_760_WT	id_uc001nuf.3_760_WT	id_uc001nuf.3_760
ATGGGGTTCGGTATGCGCCATCTCCTGCCTCCTAATAGCTTTGAGGGAGCTGAAGAAGAAGCTGTTCAAACGCCGGCGGGTGTCCTTTTTTAAGGCTCCCCGAGACGAT	WT	CTGsites	id_uc001nuf.3_760_WT	id_uc001nuf.3_760_WT	id_uc001nuf.3_760
ATGGGGTTCGGTATGCGCCTGGGTCAGGAGTCCCAAAGGTCAGTGACAGTTTCTCAGAAGAGGCCCAGCGTCCACCTCTCTCCGGATGCAGAAGGCTCCCCGAGACGAT	WT	TwoExp	id_uc004bxl.2_2533_WT	id_uc004bxl.2_2533_WT	id_uc004bxl.2_2533
ATGGGGTTCGGTATGCGCGTTTTGTTTGTGTTTTCTCCTTAGCTGCTTTATTCTCCCATTGAAAACATCCAAAGAGTAGCTGCGTCCTGGTAAGGCTCCCCGAGACGAT	WT	TwoExp	id_uc003cks.3_2950_WT	id_uc003cks.3_2950_WT	id_uc003cks.3_2950
ATGGGGTTCGGTATGCGCTCCTCACCCTTGACAACAACGTGGTGAATGGTTCCAGCCCTGCCATCCGCACTAACTACATTGGCGAATAATTAAGGCTCCCCGAGACGAT	WT	IdentifiedTRUB1	id_uc001zkh.3_928_WT	id_uc001zkh.3_928_WT	id_uc001zkh.3_928
ATGGGGTTCGGTATGCGCTCCTCACCCTTGACAACAACGTGGTGAATGGTTCCAGCCCTGCCATCCGCACTAACTACATTGGCGAATAATTAAGGCTCCCCGAGACGAT	WT	TwoExp	id_uc001zkh.3_928_WT	id_uc001zkh.3_928_WT	id_uc001zkh.3_928
ATGGGGTTCGGTATGCGCTCCTCACCCTTGACAACAACGTGGTGAATGGTTCCAGCCCTGCCATCCGCACTAACTACATTGGCCGGCTCATAAGGCTCCCCGAGACGAT	WT	IdentifiedTRUB1	id_uc001zkh.3_928_WT	id_uc001zkh.3_928_WT	id_uc001zkh.3_928
ATGGGGTTCGGTATGCGCTCCTCACCCTTGACAACAACGTGGTGAATGGTTCCAGCCCTGCCATCCGCACTAACTACATTGGCCGGCTCATAAGGCTCCCCGAGACGAT	WT	TwoExp	id_uc001zkh.3_928_WT	id_uc001zkh.3_928_WT	id_uc001zkh.3_928
ATGGGGTTCGGTATGCGCTGTTCCGGAAGTATCGGTTCCACTTCTTTTGTTCCATGCGCTGCAGGGCTTGGGTTTCCCTGGAGGCCGGAGAAAGGCTCCCCGAGACGAT	WT	PredictedTRUB1	id_uc010laz.3_619_WT	id_uc010laz.3_619_WT	id_uc010laz.3_619
ATGGGGTTCGGTATGCGCAATTGGCCAGAGGAATAGAGAGTGACTTTTTTTATGAAGACATGGAGTCCTTGACGCAGATGCTTTGGGTGTTAAGGCTCCCCGAGACGAT	WT	TwoExp	id_uc003vgh.3_1387_WT	id_uc003vgh.3_1387_WT	id_uc003vgh.3_1387
ATGGGGTTCGGTATGCGCAGGTGGTGAGGGGATGCAAAGAACTACAGGGATTGCTGGAATTTCTGAGCTAAGAAACTGAAAGCGAGTGGTGAAGGCTCCCCGAGACGAT	WT	TwoExp	id_uc002hbq.3_3655_WT	id_uc002hbq.3_3655_WT	id_uc002hbq.3_3655
ATGGGGTTCGGTATGCGCCGCCGTGGTGGAGCAGCAGCATTCCGTGGAGTTCGACTCTCCAGACTCAGGACTGCCCTCCTCTCGTTTGATTAAGGCTCCCCGAGACGAT	WT	TwoExp	id_uc002fum.4_2412_WT	id_uc002fum.4_2412_WT	id_uc002fum.4_2412
ATGGGGTTCGGTATGCGCCGCCGTGGTGGAGCAGCAGCATTCCGTGGAGTTCGACTCTCCAGACTCAGGACTGCCCTCCTCTCGTTTGATTAAGGCTCCCCGAGACGAT	WT	IdentifiedTRUB1	id_uc002fum.4_2412_WT	id_uc002fum.4_2412_WT	id_uc002fum.4_2412
ATGGGGTTCGGTATGCGCCGCCGTGGTGGAGCAGCAGCATTCCGTGGAGTTCGACTCTCCAGACTCAGGACTGCCCTCCTCTCCCAAGTGTAAGGCTCCCCGAGACGAT	WT	TwoExp	id_uc002fum.4_2412_WT	id_uc002fum.4_2412_WT	id_uc002fum.4_2412
ATGGGGTTCGGTATGCGCCGCCGTGGTGGAGCAGCAGCATTCCGTGGAGTTCGACTCTCCAGACTCAGGACTGCCCTCCTCTCCCAAGTGTAAGGCTCCCCGAGACGAT	WT	IdentifiedTRUB1	id_uc002fum.4_2412_WT	id_uc002fum.4_2412_WT	id_uc002fum.4_2412
ATGGGGTTCGGTATGCGCCGCTCAGCAGCAGCCTGAAAACTTGCTACAAGTATCTCAATCAGACCAGTCGCAGTTTCGCAGCTTACAGGCTAAGGCTCCCCGAGACGAT	WT	TwoExp	id_uc003wuh.3_477_WT	id_uc003wuh.3_477_WT	id_uc003wuh.3_477
ATGGGGTTCGGTATGCGCACTGCCGTGTTTGGACCATTGGCAAGCCTGGTTCCACTCCTCAGGGGCTCCTGGCAGTGAAGCAACGTTTATGAAGGCTCCCCGAGACGAT	WT	PredictedTRUB1	id_uc002rut.3_2694_WT	id_uc002rut.3_2694_WT	id_uc002rut.3_2694
ATGGGGTTCGGTATGCGCGACACCATGAATTGTACCACAGAGGCAGATGTTCTATCCAACATGGAAACCATGAACTGTACACACTGGAGGAAAGGCTCCCCGAGACGAT	WT	PredictedTRUB1	id_uc011egl.1_746_WT	id_uc011egl.1_746_WT	id_uc011egl.1_746
ATGGGGTTCGGTATGCGCCATCCTCTACTGCCATACCTTTCCCTGGGGGCTTGAACACAGAACAGGGAGATGGACAACCACTTGCTTCCACAAGGCTCCCCGAGACGAT	WT	Pus1	id_uc002ewn.2_2554_WT	id_uc002ewn.2_2554_WT	id_uc002ewn.2_2554
ATGGGGTTCGGTATGCGCCCGCTCCCCGCTCCTCCTCCCCAGCCATGGCGTTCACGTTCGCGGCCTTCTGCTACATGCTGGCGATTACCAAAAGGCTCCCCGAGACGAT	WT	TwoExp	id_uc001xat.1_111_WT	id_uc001xat.1_111_WT	id_uc001xat.1_111
ATGGGGTTCGGTATGCGCCGCAGAAGGTGTTTTTGCGCTGGTTCAATGAATAGATGATGCAGAGGCCCCATTGGAGACACGTGACAAACGTAAGGCTCCCCGAGACGAT	WT	TwoExp	id_uc002fuy.1_4213_WT	id_uc002fuy.1_4213_WT	id_uc002fuy.1_4213
ATGGGGTTCGGTATGCGCCCCTAATAGAGTCATTGTTAAACACTCTGGGTTCGAACCCCAGAACTTGATTCTTTCCTTGTTCTTTAAATTAAAGGCTCCCCGAGACGAT	WT	PredictedTRUB1	id_uc002mdp.2_976_WT	id_uc002mdp.2_976_WT	id_uc002mdp.2_976
ATGGGGTTCGGTATGCGCTCTGATGTCTGGCCCTGGGGAATGGCACCAGTTCCAGCCTGGGAATCAACCCAGTTCCTGAGTGCGTGGAGAGAAGGCTCCCCGAGACGAT	WT	PredictedTRUB1	id_uc004bny.1_3214_WT	id_uc004bny.1_3214_WT	id_uc004bny.1_3214
ATGGGGTTCGGTATGCGCGGGAGTGGTTGTGTGATCGCCATCTTAGGGAATGTTCTCGTCCGTGGCGCACCTGGCGCGGGCGAATCGTACTAAGGCTCCCCGAGACGAT	WT	TwoExp	id_uc001tfp.3_119_WT	id_uc001tfq.3_119_WT	id_uc001tfq.3_119
ATGGGGTTCGGTATGCGCGGGAGTGGTTGTGTGATCGCCATCTTAGGGAATGTTCTCGTCCGTGGCGCACCTGGCGCGGGCGAATCGTACTAAGGCTCCCCGAGACGAT	WT	Dkc1	id_uc001tfp.3_119_WT	id_uc001tfq.3_119_WT	id_uc001tfq.3_119
ATGGGGTTCGGTATGCGCGGGAGTGGTTGTGTGATCGCCATCTTAGGGAATGTTCTCGTCCGTGGCGCACCTGGCGCGGGCGAATGTTATTAAGGCTCCCCGAGACGAT	WT	TwoExp	id_uc001tfp.3_119_WT	id_uc001tfp.3_119_WT	id_uc001tfp.3_119
ATGGGGTTCGGTATGCGCGGGAGTGGTTGTGTGATCGCCATCTTAGGGAATGTTCTCGTCCGTGGCGCACCTGGCGCGGGCGAATGTTATTAAGGCTCCCCGAGACGAT	WT	Dkc1	id_uc001tfp.3_119_WT	id_uc001tfp.3_119_WT	id_uc001tfp.3_119
ATGGGGTTCGGTATGCGCCTCTCTCCCTACACGATAGAATTTTTGCGGCATTTGAAGAGCTTTTTCCAGATTATGTTTAAAATCCTGATGTAAGGCTCCCCGAGACGAT	WT	Pus1	id_uc003zis.2_1249_WT	id_uc003zis.2_1249_WT	id_uc003zis.2_1249
ATGGGGTTCGGTATGCGCGTGGCGGTGGCCGACGACTTCTGCAAAGTGCATCTCTTCCAGTACCCGTGCGCTCGTGCCAAGGCGCTCACTAAAGGCTCCCCGAGACGAT	WT	Pus1	id_uc001ntu.1_2766_WT	id_uc001ntu.1_2766_WT	id_uc001ntu.1_2766
ATGGGGTTCGGTATGCGCAGATCCCTTACACATTTGAGGACCGAATCAACTTTGCCGTGTTCCCATCCCTGCAGGGGGGCCCCACGATGTCAAGGCTCCCCGAGACGAT	WT	TwoExp	id_uc001snf.2_1156_WT	id_uc001snf.2_1156_WT	id_uc001snf.2_1156
ATGGGGTTCGGTATGCGCACAAGAAGAAGATTAAGACAGAGAGCGGCCGCTACATCAGCAGCTCCTACAAGCGAGACCTCTATAGCACGCCAAGGCTCCCCGAGACGAT	WT	TwoExp	id_uc001tuq.4_2301_WT	id_uc001tuq.4_2301_WT	id_uc001tuq.4_2301
ATGGGGTTCGGTATGCGCGCACTCTGGACTTTGAATCCAGCAATCCGAGTTCGAATCTCGGTGGGACCTTTCAAAGGTGAACGGAAACCTGAAGGCTCCCCGAGACGAT	WT	PredictedTRUB1	id_uc003nlp.1_560_WT	id_uc003nlp.1_560_WT	id_uc003nlp.1_560
ATGGGGTTCGGTATGCGCAGAGCTGTTTCTGAACTAGAACTTTTAGGATTTATAAAACCTACCAAACAGAAGACTGACCATGTTGTGGCTTAAGGCTCCCCGAGACGAT	WT	TwoExp	id_uc003pmg.3_2182_WT	id_uc003pmg.3_2182_WT	id_uc003pmg.3_2182
ATGGGGTTCGGTATGCGCACATACGTTCAATGGCCGCAGTATCCTGACTGTGCAAAGGTAGCATAATCACTTGTTCCTTAAATTGCCTGTGAAGGCTCCCCGAGACGAT	WT	TwoExp	id_uc022bxr.1_472_WT	id_uc022bxr.1_472_WT	id_uc022bxr.1_472
ATGGGGTTCGGTATGCGCACATGCGTTTAACGGCCGCGGTACCCTAACTGTGCAAAGGTAGCATAATCACTTGTTCCTTAAATATGTGCCCAAGGCTCCCCGAGACGAT	WT	TwoExp	id_uc001miq.3_905_WT	id_uc001miq.3_905_WT	id_uc001miq.3_905
ATGGGGTTCGGTATGCGCCCGCGCACTTCGTCATGTTCTTCGCGCCCTGGTGTGGACACTGCCAGCGGCTGCAGCCGACTTGGTCCCAGGCAAGGCTCCCCGAGACGAT	WT	TwoExp	id_uc003mxv.3_304_WT	id_uc003mxv.3_304_WT	id_uc003mxv.3_304
ATGGGGTTCGGTATGCGCTAAATTCAAAACTGATCCTTTTAGTTCCTCATTATATGATATGAAGGGATTAACTGTAGCAGGATACGGCAATAAGGCTCCCCGAGACGAT	WT	TwoExp	id_uc021wjh.1_631_WT	id_uc021wjh.1_631_WT	id_uc021wjh.1_631
ATGGGGTTCGGTATGCGCCCCTCTGGGCCTGGGATATTGTGGTTGATAACTGTGCCATCTGCAGGAACCACATTATGGATCTTTCTTCAACAAGGCTCCCCGAGACGAT	WT	TwoExp	id_uc011aoy.1_1958_WT	id_uc011aoy.1_1958_WT	id_uc011aoy.1_1958
ATGGGGTTCGGTATGCGCCCTCAGCTGGGGGAAAGGCAGTTCTGGTGCTGTAGAGGCCCTGGTGCAGAAAGTGGGACGTCTTTGCTGAAAGAAGGCTCCCCGAGACGAT	WT	TwoExp	id_uc002hay.3_1770_WT	id_uc002hay.3_1770_WT	id_uc002hay.3_1770
ATGGGGTTCGGTATGCGCTGGAAGAGGAAGAGATTCAAATGAACGACAGTTCAAACCTGAGTTGTGAACAGGAGAAACCAATGAAGCGTGAAAGGCTCCCCGAGACGAT	WT	TwoExp	id_uc003pum.3_731_WT	id_uc003pum.3_731_WT	id_uc003pum.3_731
ATGGGGTTCGGTATGCGCGAAAGAAATTGATAAGCAAAGTAGCTTGTATATTCTCATCAGCACTCAGGAATCCTCTGCAGGCAGACGAATAAAGGCTCCCCGAGACGAT	WT	Pus1	id_uc004dtq.3_1643_WT	id_uc004dtq.3_1643_WT	id_uc004dtq.3_1643
ATGGGGTTCGGTATGCGCGCCACCGCATCCACCGGTCACTCGCCAGCCAGTTCAAGTACGCCCTGGTGTGGGGCACCAGCACCGATCTAGTAAGGCTCCCCGAGACGAT	WT	TwoExp	id_uc002gsh.1_1044_WT	id_uc002gsh.1_1044_WT	id_uc002gsh.1_1044
ATGGGGTTCGGTATGCGCTGGAGCCCTTCCACGCCCAGGTGGGCTCCCTGTACATCGTCCTCGGGGAGCTCCAGCATCAGCAGCCAACATGAAGGCTCCCCGAGACGAT	WT	TwoExp	id_uc002jqg.4_519_WT	id_uc002jqg.4_519_WT	id_uc002jqg.4_519
ATGGGGTTCGGTATGCGCAGCTGCTGATGAAGGAGAGAGAAGTGCAGAGTTCGATTCTGTACAAGGGGGCAGCGGCAGAAGGCTTTTGAGAAAGGCTCCCCGAGACGAT	WT	PredictedTRUB1	id_uc002htw.3_1705_WT	id_uc002htw.3_1705_WT	id_uc002htw.3_1705
ATGGGGTTCGGTATGCGCCCCCCAAGGCCCGAGAGGTGCTGCATACCACGTACCAGAGCCAGGAGCGTGGCACACACAGCCTGCCCGTGACAAGGCTCCCCGAGACGAT	WT	TwoExp	id_uc002kfg.4_1465_WT	id_uc002kfg.4_1465_WT	id_uc002kfg.4_1465
ATGGGGTTCGGTATGCGCATGGGTACTGGGGAGGGAGCCGCGGTGTGTGTTCTACTCACTAGGCCTCGTTGCCACCTCTGCACATACAGGTAAGGCTCCCCGAGACGAT	WT	PredictedTRUB1	id_uc010gsg.2_1290_WT	id_uc010gsg.2_1290_WT	id_uc010gsg.2_1290
ATGGGGTTCGGTATGCGCAGTTCAGAGAGCGGTACCTTTCCTACTGTCTTTTCTTTGACTCCATGGAGGAATTTGTAACGATCACCTAATGAAGGCTCCCCGAGACGAT	WT	Pus1	id_uc002fjd.3_1825_WT	id_uc002fjd.3_1825_WT	id_uc002fjd.3_1825
ATGGGGTTCGGTATGCGCTTTAAACAATGTGTCTTTGTTTTTTTAGCCCCTTCCAAATGACAAAACCTTACTCTACAATCCATAGGTTCACAAGGCTCCCCGAGACGAT	WT	TwoExp	id_uc002ewr.2_3483_WT	id_uc002ewr.2_3483_WT	id_uc002ewr.2_3483
ATGGGGTTCGGTATGCGCAGGCTGAGATCGTCAAAAGGCTGAACGGGATTTGTGCCCAGGTCCTGCCCTACCTCTCCCAAGAGCTGTTGGAAAGGCTCCCCGAGACGAT	WT	TwoExp	id_uc002lxb.1_506_WT	id_uc002lxb.1_506_WT	id_uc002lxb.1_506
ATGGGGTTCGGTATGCGCTTGCCGTCTCTGTTCTTATGTTTATAATCAGTTCAATGCTGGTTTATGGAGCAATTTCTTATCAACATGTAGGAAGGCTCCCCGAGACGAT	WT	IdentifiedTRUB1	id_uc002rdm.3_792_WT	id_uc002rdm.3_792_WT	id_uc002rdm.3_792
ATGGGGTTCGGTATGCGCTTGCCGTCTCTGTTCTTATGTTTATAATCAGTTCAATGCTGGTTTATGGAGCAATTTCTTATCAACATGTAGGAAGGCTCCCCGAGACGAT	WT	TwoExp	id_uc002rdm.3_792_WT	id_uc002rdm.3_792_WT	id_uc002rdm.3_792
ATGGGGTTCGGTATGCGCTTGCCGTCTCTGTTCTTATGTTTATAATCAGTTCAATGCTGGTTTATGGAGCAATTTCTTATCAAATCGTCTTAAGGCTCCCCGAGACGAT	WT	IdentifiedTRUB1	id_uc002rdm.3_792_WT	id_uc002rdm.3_792_WT	id_uc002rdm.3_792
ATGGGGTTCGGTATGCGCTTGCCGTCTCTGTTCTTATGTTTATAATCAGTTCAATGCTGGTTTATGGAGCAATTTCTTATCAAATCGTCTTAAGGCTCCCCGAGACGAT	WT	TwoExp	id_uc002rdm.3_792_WT	id_uc002rdm.3_792_WT	id_uc002rdm.3_792
ATGGGGTTCGGTATGCGCAGCCAGTTGTGTTCAGACACACACATCACAGCTTGACTCACTAACTGAGGCCTTTCCATAGCTCCTATAGCTTAAGGCTCCCCGAGACGAT	WT	Pus1	id_uc003zvb.3_1047_WT	id_uc003zvb.3_1047_WT	id_uc003zvb.3_1047
ATGGGGTTCGGTATGCGCACGGCAGCGGCGGTGGCCGCGGCTGCTGCTGCTGCTACTGCCACCGCTGCCACGGCTGCTGGCCCGACGTAGGAAGGCTCCCCGAGACGAT	WT	CTGsites	id_uc004dtg.3_536_WT	id_uc004dtg.3_536_WT	id_uc004dtg.3_536
ATGGGGTTCGGTATGCGCACGGCAGCGGCGGTGGCCGCGGCTGCTGCTGCTGCTACTGCCACCGCTGCCACGGCTGCTGGCCCAATCGAGGAAGGCTCCCCGAGACGAT	WT	CTGsites	id_uc004dtg.3_536_WT	id_uc004dtg.3_536_WT	id_uc004dtg.3_536
ATGGGGTTCGGTATGCGCACGTGCTCATCTTTGACCTGGGCGGGGGCACCTTCGACGTGTCCATCCTGACGATCGACGACGGCTAGGGCGAAAGGCTCCCCGAGACGAT	WT	TwoExp	id_uc003nxi.1_333_WT	id_uc003nxi.1_333_WT	id_uc003nxi.1_333
ATGGGGTTCGGTATGCGCGCTTTTGCTGATAAAGGACCTCCCCCAGGGCATTATGATATCAACGAATCCCTTGTGAAGCAGTCTGATTAACAAGGCTCCCCGAGACGAT	WT	Pus1	id_uc001bjc.3_744_WT	id_uc001bjc.3_744_WT	id_uc001bjc.3_744
ATGGGGTTCGGTATGCGCGCCCTGGAAGTTGTTCCTACGCAAGGAGGTGTTCTACCCACGGGAGAACTTCAGCCATCCCTACTTTGATTGCAAGGCTCCCCGAGACGAT	WT	PredictedTRUB1	id_uc002jor.1_2254_WT	id_uc002jor.1_2254_WT	id_uc002jor.1_2254
ATGGGGTTCGGTATGCGCGACCGAGACCTCATGACACTTCCTATTCAGAATAAGCTGGCACCATTCATCGCCAAACGCCGAACGCTTTAAAAAGGCTCCCCGAGACGAT	WT	TwoExp	id_uc002lgp.4_451_WT	id_uc002lgp.4_451_WT	id_uc002lgp.4_451
ATGGGGTTCGGTATGCGCACGCCAGCCTCCCGCATCCAGCCGGCTGGCAATACTTCTCCCAGAGCGATCTCGCGGGTCGACCGCATACATGAAGGCTCCCCGAGACGAT	WT	TwoExp	id_uc003avk.3_1195_WT	id_uc003avk.3_1195_WT	id_uc003avk.3_1195
ATGGGGTTCGGTATGCGCAGTTTTGACAGCTGCCAGTCTTCCTGCCCCTTTCACACTGCAGCTGAAGTTCATTACCTGAAGGATCTATGCGAAGGCTCCCCGAGACGAT	WT	TwoExp	id_uc003spp.3_2446_WT	id_uc003spp.3_2446_WT	id_uc003spp.3_2446
ATGGGGTTCGGTATGCGCTGTACCGCGGCCTTAGCTCCCTGCTCTACGGTTCCATCCCCAAGGCGGCCGTCAGGTTTGGAATGATAAAGATAAGGCTCCCCGAGACGAT	WT	TwoExp	id_uc002zoz.3_396_WT	id_uc021wlb.1_307_WT	id_uc021wlb.1_307
ATGGGGTTCGGTATGCGCTGTACCGCGGCCTTAGCTCCCTGCTCTACGGTTCCATCCCCAAGGCGGCCGTCAGGTTTGGAATGATAAAGATAAGGCTCCCCGAGACGAT	WT	IdentifiedTRUB1	id_uc002zoz.3_396_WT	id_uc021wlb.1_307_WT	id_uc021wlb.1_307
ATGGGGTTCGGTATGCGCTGTACCGCGGCCTTAGCTCCCTGCTCTACGGTTCCATCCCCAAGGCGGCCGTCAGGTTTGGAATGCGTCCAGGAAGGCTCCCCGAGACGAT	WT	TwoExp	id_uc002zoz.3_396_WT	id_uc002zoz.3_396_WT	id_uc002zoz.3_396
ATGGGGTTCGGTATGCGCTGTACCGCGGCCTTAGCTCCCTGCTCTACGGTTCCATCCCCAAGGCGGCCGTCAGGTTTGGAATGCGTCCAGGAAGGCTCCCCGAGACGAT	WT	IdentifiedTRUB1	id_uc002zoz.3_396_WT	id_uc002zoz.3_396_WT	id_uc002zoz.3_396
ATGGGGTTCGGTATGCGCCTTTGCCTCTACCTTCCGGCTGCTCACAGTGTTTGCTTATGGGACATACGCTGACTACTTAGCTGTTCCATACAAGGCTCCCCGAGACGAT	WT	Pus1	id_uc001qqh.3_392_WT	id_uc001qqh.3_392_WT	id_uc001qqh.3_392
ATGGGGTTCGGTATGCGCCTTTGCCTCTACCTTCCGGCTGCTCACAGTGTTTGCTTATGGGACATACGCTGACTACTTAGCTGTTCCATACAAGGCTCCCCGAGACGAT	WT	TwoExp	id_uc001qqh.3_392_WT	id_uc001qqh.3_392_WT	id_uc001qqh.3_392
ATGGGGTTCGGTATGCGCCTTTGCCTCTACCTTCCGGCTGCTCACAGTGTTTGCTTATGGGACATACGCTGACTACTTAGCTGCGCGTTTTAAGGCTCCCCGAGACGAT	WT	Pus1	id_uc001qqh.3_392_WT	id_uc001qqh.3_392_WT	id_uc001qqh.3_392
ATGGGGTTCGGTATGCGCCTTTGCCTCTACCTTCCGGCTGCTCACAGTGTTTGCTTATGGGACATACGCTGACTACTTAGCTGCGCGTTTTAAGGCTCCCCGAGACGAT	WT	TwoExp	id_uc001qqh.3_392_WT	id_uc001qqh.3_392_WT	id_uc001qqh.3_392
ATGGGGTTCGGTATGCGCTGGGGGAGCGGATCTGGGTGGACAGCCCTCACTGTAAGACGTTTGTGGACAACATCCAGACGGCCAGGATCCGAAGGCTCCCCGAGACGAT	WT	TwoExp	id_uc003skn.2_838_WT	id_uc003skn.2_838_WT	id_uc003skn.2_838
ATGGGGTTCGGTATGCGCGCTGGGGAGCTGTGAGAGTGTGAGGGGCACGTTCCAGCCGTCTGGACTCTTTCTCTCCTACTGAGAAGTCAACAAGGCTCCCCGAGACGAT	WT	PredictedTRUB1	id_uc004dql.3_204_WT	id_uc004dql.3_204_WT	id_uc004dql.3_204
ATGGGGTTCGGTATGCGCATGCCACGCCTTATGAAGCACTGTTTCACAGTTACTTTCACTTCCCGAATAAAGGTTACCAGGTAAAAAGAAGAAGGCTCCCCGAGACGAT	WT	TwoExp	id_uc003sqe.4_2816_WT	id_uc003sqe.4_2816_WT	id_uc003sqe.4_2816
ATGGGGTTCGGTATGCGCAAATCACTGAGGCATTTTTACTACTATTCTGTTAAAATCAGGATTTTAGTGCTTGCCACCACCAGGGGCAATCAAGGCTCCCCGAGACGAT	WT	TwoExp	id_uc002uui.3_2180_WT	id_uc002uui.3_2180_WT	id_uc002uui.3_2180
ATGGGGTTCGGTATGCGCGAAGGAGGTGCCACAAAGGGCAAAGAGATTGATTTTGATGATGTGGCTGCAATAAACCCAGAACTTCGGAGCTAAGGCTCCCCGAGACGAT	WT	TwoExp	id_uc001cmg.4_287_WT	id_uc001cmg.4_287_WT	id_uc001cmg.4_287
ATGGGGTTCGGTATGCGCGATGCTCGACATGCAGCAGAAGGAGAAATATATACCAAACTGAATCAAAAAATTGATGAATTTGTTTTTGGGGAAGGCTCCCCGAGACGAT	WT	Pus1	id_uc001kig.3_1873_WT	id_uc001kig.3_1873_WT	id_uc001kig.3_1873
ATGGGGTTCGGTATGCGCAGAAGAAGCTTTCTTGGCTTGGAAAGAAGATATAACCCAAGAGTTTCCGGGAAAAGGCAAGGCTTCGCAGCAAAAGGCTCCCCGAGACGAT	WT	TwoExp	id_uc001mjc.3_3036_WT	id_uc001mjc.3_3036_WT	id_uc001mjc.3_3036
ATGGGGTTCGGTATGCGCCTTTTTGGAGACAGATTCGCAGTGGTCGCTTCTTCTCCTTGACGGAGTCGGTTTGTCACTCAGGCCTCGGAGCAAGGCTCCCCGAGACGAT	WT	TwoExp	id_uc001bqd.3_135_WT	id_uc001bqd.3_135_WT	id_uc001bqd.3_135
ATGGGGTTCGGTATGCGCAGAAATCTCTTTCCAAGAAAAGGGAAGAATCTTACCTCTCGAATTCCCAAACACCCGAAAGACACATTTACTAAAGGCTCCCCGAGACGAT	WT	TwoExp	id_uc003znk.3_2808_WT	id_uc003znk.3_2808_WT	id_uc003znk.3_2808
ATGGGGTTCGGTATGCGCGTGGCCGAGTGGTTAAGGCGATGGACTAGAAATCCATTGGGGTCTCCCCGCGCAGGTTCGAATCCGGTCAGCAAAGGCTCCCCGAGACGAT	WT	TwoExp	id_uc002gkq.4_5241_WT	id_uc002gkq.4_5241_WT	id_uc002gkq.4_5241
ATGGGGTTCGGTATGCGCAGGGGAAGGCAGGCAGCGGACTCCGCCAATATTATCTGTCCAAGATTGAAGAACTCCAGCTGATTACCCCCACAAGGCTCCCCGAGACGAT	WT	TwoExp	id_uc002jcb.3_152_WT	id_uc002jcb.3_152_WT	id_uc002jcb.3_152
ATGGGGTTCGGTATGCGCTCAGTTTATGGAAGGATATAACTTCCGTAAGTTACATCCTTATGGAAGCTACTGAATAAAAGAAGCACTCTTCAAGGCTCCCCGAGACGAT	WT	TwoExp	id_uc022ayx.1_888_WT	id_uc022ayx.1_888_WT	id_uc022ayx.1_888
ATGGGGTTCGGTATGCGCTCCTCTTTCCCTAAGCAGCCTGAGGTGATCTGTGAAAATGGTTCGCTATTCACTTGACCCGGAGATTTCCAGGAAGGCTCCCCGAGACGAT	WT	TwoExp	id_uc002ldq.3_118_WT	id_uc002ldq.3_118_WT	id_uc002ldq.3_118
ATGGGGTTCGGTATGCGCGCAGAGAAGGAGGCCAAACAGAAAGAGCTCAGTGAGAAACAGCTAAGCCAAGCCACTGCTGCTGCGCTTATGAAAGGCTCCCCGAGACGAT	WT	TwoExp	id_uc002fer.3_361_WT	id_uc002fer.3_361_WT	id_uc002fer.3_361
ATGGGGTTCGGTATGCGCGCTGCTAGGAGAAAGGGAAGATGTTGTTCATGTGCACAAATATAATCCTACAGAAAAGGCAGAATATAACATAAAGGCTCCCCGAGACGAT	WT	TwoExp	id_uc003knt.3_1594_WT	id_uc003knt.3_1594_WT	id_uc003knt.3_1594
ATGGGGTTCGGTATGCGCAAATATGTCAAAGTACCAGAGCAACCCAAAGGTTATGAATCTCATCAGTAAATTGTCAGCCAAATCCGCACGTAAGGCTCCCCGAGACGAT	WT	TwoExp	id_uc001vej.3_1121_WT	id_uc001vej.3_1121_WT	id_uc001vej.3_1121
ATGGGGTTCGGTATGCGCTTGTGACAAATGCCCGGAGTCCTGGAGCTCGCTGTTACGGTTTTGTCACGATGTCCACAGCAGAATCAGGACTAAGGCTCCCCGAGACGAT	WT	Dkc1	id_uc002mce.4_1514_WT	id_uc002mce.4_1514_WT	id_uc002mce.4_1514
ATGGGGTTCGGTATGCGCAGAGTTGGGCTCTGGGACTAGGACATTGGGGTTCGAATCCCAGCTCTGCTGCTGAACCGTGGGCAGCTCCCTCAAGGCTCCCCGAGACGAT	WT	PredictedTRUB1	id_uc003are.2_2186_WT	id_uc003are.2_2186_WT	id_uc003are.2_2186
ATGGGGTTCGGTATGCGCAAGTGCGAGGAGTGTGGGCTGCTGCTCTCCTCTGAGGGCGAGTGTCAGGGCTGCTACCCGCTGGACGGGGAATAAGGCTCCCCGAGACGAT	WT	TwoExp	id_uc003uww.3_1494_WT	id_uc003uww.3_1494_WT	id_uc003uww.3_1494
ATGGGGTTCGGTATGCGCGCGATCTCTGCGGGAAAGCTTTCAGCGCGAGTTCAAACCTCACCGCACACAGGAAGATACACACGCGTTTACTAAGGCTCCCCGAGACGAT	WT	IdentifiedTRUB1	id_uc002mku.3_1681_WT	id_uc002mku.3_1681_WT	id_uc002mku.3_1681
ATGGGGTTCGGTATGCGCGCGATCTCTGCGGGAAAGCTTTCAGCGCGAGTTCAAACCTCACCGCACACAGGAAGATACACACGCGTTTACTAAGGCTCCCCGAGACGAT	WT	TwoExp	id_uc002mku.3_1681_WT	id_uc002mku.3_1681_WT	id_uc002mku.3_1681
ATGGGGTTCGGTATGCGCGCGATCTCTGCGGGAAAGCTTTCAGCGCGAGTTCAAACCTCACCGCACACAGGAAGATACACACGGGGTTTGGAAGGCTCCCCGAGACGAT	WT	IdentifiedTRUB1	id_uc002mku.3_1681_WT	id_uc002mku.3_1681_WT	id_uc002mku.3_1681
ATGGGGTTCGGTATGCGCGCGATCTCTGCGGGAAAGCTTTCAGCGCGAGTTCAAACCTCACCGCACACAGGAAGATACACACGGGGTTTGGAAGGCTCCCCGAGACGAT	WT	TwoExp	id_uc002mku.3_1681_WT	id_uc002mku.3_1681_WT	id_uc002mku.3_1681
ATGGGGTTCGGTATGCGCCCCCAAGAGTGGCCGTTCCTACCACGAGGAGTTCAACCCTCCAAAAGAGCCCATGAAAGATGACAGGGCAAGTAAGGCTCCCCGAGACGAT	WT	TwoExp	id_uc001bwo.2_551_WT	id_uc001bwp.2_551_WT	id_uc001bwp.2_551
ATGGGGTTCGGTATGCGCCCCCAAGAGTGGCCGTTCCTACCACGAGGAGTTCAACCCTCCAAAAGAGCCCATGAAAGATGACAGGGCAAGTAAGGCTCCCCGAGACGAT	WT	IdentifiedTRUB1	id_uc001bwo.2_551_WT	id_uc001bwp.2_551_WT	id_uc001bwp.2_551
ATGGGGTTCGGTATGCGCCCCCAAGAGTGGCCGTTCCTACCACGAGGAGTTCAACCCTCCAAAAGAGCCCATGAAAGATGACAAGCCGGTTAAGGCTCCCCGAGACGAT	WT	TwoExp	id_uc001bwo.2_551_WT	id_uc001bwo.2_551_WT	id_uc001bwo.2_551
ATGGGGTTCGGTATGCGCCCCCAAGAGTGGCCGTTCCTACCACGAGGAGTTCAACCCTCCAAAAGAGCCCATGAAAGATGACAAGCCGGTTAAGGCTCCCCGAGACGAT	WT	IdentifiedTRUB1	id_uc001bwo.2_551_WT	id_uc001bwo.2_551_WT	id_uc001bwo.2_551
ATGGGGTTCGGTATGCGCGCCACCGTGTGTGTCCCGAGTAACCGTGCCGTTGTCGTGTGATGCCATAAGCGTCTGTGCGTGGAGAAAAGTAAAGGCTCCCCGAGACGAT	WT	TwoExp	id_uc002pft.1_828_WT	id_uc002pft.1_828_WT	id_uc002pft.1_828
ATGGGGTTCGGTATGCGCAGACAGAATTTGAAATCAAGTCCTGCTTCATTTACAAGAATTTTGGTGGGCATCTAATCCTACATCGCGGTCTAAGGCTCCCCGAGACGAT	WT	TwoExp	id_uc003dna.4_1663_WT	id_uc003dna.4_1663_WT	id_uc003dna.4_1663
ATGGGGTTCGGTATGCGCGACTGTTTGCAACTTTACAGATGGTGCATTGGTTCAGCATCAGGAGTGGGATGGGAAGGAAAGCACATCACGTAAGGCTCCCCGAGACGAT	WT	TwoExp	id_uc003wlb.3_667_WT	id_uc003wlb.3_667_WT	id_uc003wlb.3_667
ATGGGGTTCGGTATGCGCAGGCTGTCACATGCAGCTGAGAAAAGGTATGTTCAAGTCATAAGTAGGTAATTGATAGGGTATGACATCACCAAAGGCTCCCCGAGACGAT	WT	PredictedTRUB1	id_uc003fup.3_3094_WT	id_uc003fup.3_3094_WT	id_uc003fup.3_3094
ATGGGGTTCGGTATGCGCTGGGCTTTGGTATTGACTGAGTGGCTGACAGTTATCTTCCAACCCCAACTGGCTTGGGGGCAGGACGAACTCCAAGGCTCCCCGAGACGAT	WT	TwoExp	id_uc001jux.3_4273_WT	id_uc001jux.3_4273_WT	id_uc001jux.3_4273
ATGGGGTTCGGTATGCGCAGGCTTTGCTCTTTCATACTGGTGGTCTGGGTTCAATTCCCTGCCTATGAAGTAAGTTGCGTTTATCCGGGCTAAGGCTCCCCGAGACGAT	WT	PredictedTRUB1	id_uc003hap.3_1822_WT	id_uc003hap.3_1822_WT	id_uc003hap.3_1822
ATGGGGTTCGGTATGCGCGTTGCTTACCTTTTAAACTATTCTTTTAGCCGTACTCTGACAGCTGTGCACGATGCCATCCTTGAGCTATTGCAAGGCTCCCCGAGACGAT	WT	TwoExp	id_uc002qxy.3_2324_WT	id_uc002qxy.3_2324_WT	id_uc002qxy.3_2324
ATGGGGTTCGGTATGCGCGTCAGCAGGGCTGGACTGAGGCCCAGCCCAGTTCCATGCTGGAACCCCTGGCCCTGCACCCACCATGCCACGGAAGGCTCCCCGAGACGAT	WT	PredictedTRUB1	id_uc004aag.1_2290_WT	id_uc004aag.1_2290_WT	id_uc004aag.1_2290
ATGGGGTTCGGTATGCGCCGCAGCATTTGCAAAGTTTGAAATAACTTTGTTTCTCTCAGCCTATTATCCATCTGTACCATTACGCAGGCTCAAGGCTCCCCGAGACGAT	WT	TwoExp	id_uc010bbt.1_6932_WT	id_uc010bbt.1_6932_WT	id_uc010bbt.1_6932
ATGGGGTTCGGTATGCGCGAAAAGCCCTCTTCGGGATCATGAGACTTGGTTCTAGTCCAATTTCTGCCACTGAGGATGAATGTAGAGGCGCAAGGCTCCCCGAGACGAT	WT	PredictedTRUB1	id_uc003krc.3_2290_WT	id_uc003krc.3_2290_WT	id_uc003krc.3_2290
ATGGGGTTCGGTATGCGCTGTTCTCGGTTTGCAGGAACCCTGGGTGCAGGTTCGCAGCCCTGTCAACCAGCTCCGAGCCGGCAAGGTATGGAAGGCTCCCCGAGACGAT	WT	TwoExp	id_uc003qsw.4_190_WT	id_uc003qsw.4_190_WT	id_uc003qsw.4_190
ATGGGGTTCGGTATGCGCGGACAAGTGGCGGGCCCTGCACTCATGAGGGCTTCCAATGTGCTGCCCCCCTCTTAATACTCACCAAGTTAGTAAGGCTCCCCGAGACGAT	WT	TwoExp	id_uc004fkm.2_839_WT	id_uc004fkm.2_839_WT	id_uc004fkm.2_839
ATGGGGTTCGGTATGCGCAGAAAATCCACAGATACGTGGACCTGCGCAGTTCAAACCTGTGTTGTTTGGGTCAACTGTATTGTAATGTAAAAAGGCTCCCCGAGACGAT	WT	PredictedTRUB1	id_uc003zki.3_2257_WT	id_uc003zki.3_2257_WT	id_uc003zki.3_2257
ATGGGGTTCGGTATGCGCCCCTGAAAATCATATGGGCTTGGATTTGGATATTCTCAACAGAAAGGGTTAAAGGCTGATGGTACGGCAACAAAAGGCTCCCCGAGACGAT	WT	TwoExp	id_uc001vwv.3_109_WT	id_uc001vwv.3_109_WT	id_uc001vwv.3_109
ATGGGGTTCGGTATGCGCGGGAGAGGTGGAGGCCCTGCTGGATCGATACTTCGAGGCTGATCCTCCAGGGCAGGTGGCTGCCTGTTTAACTAAGGCTCCCCGAGACGAT	WT	TwoExp	id_uc003ouo.3_491_WT	id_uc003ouo.3_491_WT	id_uc003ouo.3_491
ATGGGGTTCGGTATGCGCAAGTGATGGATCTTGTACTCCGTGTTGCAGATTACTATTTTTTTACACCATACGTGTATCCAGCCCCAATCGGAAGGCTCCCCGAGACGAT	WT	TwoExp	id_uc001pxu.3_177_WT	id_uc001pxu.3_177_WT	id_uc001pxu.3_177
ATGGGGTTCGGTATGCGCGCGGCCAGAAAAAGGCGCTGGAAAAAGTGAATTTCGTAACCAGAAGCCGAAGCCGGAGAACCAAGTTACTTTCAAGGCTCCCCGAGACGAT	WT	Pus1	id_uc001sxt.3_95_WT	id_uc001sxt.3_95_WT	id_uc001sxt.3_95
ATGGGGTTCGGTATGCGCCATTGAGAAGCATTCGGAGTGTATTTAGCCTGTAGATGTTGTGATATGCAAATATCCCATTCCCTATTTGCTAAAGGCTCCCCGAGACGAT	WT	TwoExp	id_uc003eqi.3_766_WT	id_uc003eqi.3_766_WT	id_uc003eqi.3_766
ATGGGGTTCGGTATGCGCTGTCCTCCGCTGTGGCAAGAAGAAGGTCTGGTTAGACCCCAATGAGACCAATGAAATCGCCAATGTATGGAAAAAGGCTCCCCGAGACGAT	WT	Dkc1	id_uc002hrq.1_134_WT	id_uc002hrq.1_134_WT	id_uc002hrq.1_134
ATGGGGTTCGGTATGCGCTGTCCTCCGCTGTGGCAAGAAGAAGGTCTGGTTAGACCCCAATGAGACCAATGAAATCGCCAATGTATGGAAAAAGGCTCCCCGAGACGAT	WT	TwoExp	id_uc002hrq.1_134_WT	id_uc002hrq.1_134_WT	id_uc002hrq.1_134
ATGGGGTTCGGTATGCGCTGTCCTCCGCTGTGGCAAGAAGAAGGTCTGGTTAGACCCCAATGAGACCAATGAAATCGCCAATGTTTTTGCGAAGGCTCCCCGAGACGAT	WT	Dkc1	id_uc002hrq.1_134_WT	id_uc002hrq.1_134_WT	id_uc002hrq.1_134
ATGGGGTTCGGTATGCGCTGTCCTCCGCTGTGGCAAGAAGAAGGTCTGGTTAGACCCCAATGAGACCAATGAAATCGCCAATGTTTTTGCGAAGGCTCCCCGAGACGAT	WT	TwoExp	id_uc002hrq.1_134_WT	id_uc002hrq.1_134_WT	id_uc002hrq.1_134
ATGGGGTTCGGTATGCGCGTTGGAGATTGATAATTCAGAACTTCTTTATATGCTCGAGTCTCCAGAGTCACTCCGTTCTAAGGGTCCAGTTAAGGCTCCCCGAGACGAT	WT	TwoExp	id_uc001upy.3_1834_WT	id_uc001upy.3_1834_WT	id_uc001upy.3_1834
ATGGGGTTCGGTATGCGCCCTAGCGTCAGTATTTTCCCTGCTAGGGGTTTTAGGTCTCTTCCCCTCTCAGAGCTACTTGGGCCCACTGGAAAAGGCTCCCCGAGACGAT	WT	TwoExp	id_uc004dwf.3_2921_WT	id_uc004dwf.3_2921_WT	id_uc004dwf.3_2921
ATGGGGTTCGGTATGCGCGCAAGGAAAAGAGGAAACATCTCGGGCCTAGTTCAAACCTTTGCCTCAAAGCCATCCCCCACCAGCTAGAACGAAGGCTCCCCGAGACGAT	WT	TwoExp	id_uc002mbo.3_3110_WT	id_uc002mbo.3_3110_WT	id_uc002mbo.3_3110
ATGGGGTTCGGTATGCGCGCAAGGAAAAGAGGAAACATCTCGGGCCTAGTTCAAACCTTTGCCTCAAAGCCATCCCCCACCAGCTAGAACGAAGGCTCCCCGAGACGAT	WT	IdentifiedTRUB1	id_uc002mbo.3_3110_WT	id_uc002mbo.3_3110_WT	id_uc002mbo.3_3110
ATGGGGTTCGGTATGCGCGCAAGGAAAAGAGGAAACATCTCGGGCCTAGTTCAAACCTTTGCCTCAAAGCCATCCCCCACCAGTACCGGGAAAGGCTCCCCGAGACGAT	WT	TwoExp	id_uc002mbo.3_3110_WT	id_uc002mbo.3_3110_WT	id_uc002mbo.3_3110
ATGGGGTTCGGTATGCGCGCAAGGAAAAGAGGAAACATCTCGGGCCTAGTTCAAACCTTTGCCTCAAAGCCATCCCCCACCAGTACCGGGAAAGGCTCCCCGAGACGAT	WT	IdentifiedTRUB1	id_uc002mbo.3_3110_WT	id_uc002mbo.3_3110_WT	id_uc002mbo.3_3110
ATGGGGTTCGGTATGCGCACGCGGCTGCCTGCACTGACCGTTCACGTGACTCAGCCAAAGGACGGTGGCTTCTGCGAAGTGTGTAGAGCGGAAGGCTCCCCGAGACGAT	WT	TwoExp	id_uc001jsm.3_1308_WT	id_uc001jsm.3_1308_WT	id_uc001jsm.3_1308
ATGGGGTTCGGTATGCGCCAGTAACAATGCTGCAGCTTTTCCGCGCTACCTGCAGAGGGGTCCATACGGCGTTGTTCTGGATTTTGGTGAAAAGGCTCCCCGAGACGAT	WT	TwoExp	id_uc002nrn.3_362_WT	id_uc002nrn.3_362_WT	id_uc002nrn.3_362
ATGGGGTTCGGTATGCGCGGAGGCCAATAAGAACCTCACATGGCGGGACATGCAACACCTGGTGGTACAGACCTCGAAGCCAGCTATTAGTAAGGCTCCCCGAGACGAT	WT	TwoExp	id_uc002bpu.1_1395_WT	id_uc002bpu.1_1395_WT	id_uc002bpu.1_1395
ATGGGGTTCGGTATGCGCCTCGCATTAACATAAAGAGCGGGAACAGCAGATTACCTAAAACCTCGGGCAGAAGAGGAGAGGAGATAACACGAAGGCTCCCCGAGACGAT	WT	TwoExp	id_uc003gar.3_318_WT	id_uc003gar.3_318_WT	id_uc003gar.3_318
ATGGGGTTCGGTATGCGCGGGCCCCTGGAGCCGGCTGTCGTGGATGCCTTTAATCAAGCCTGGCATTTGGTTGCTCACGAATGTGAGTACCAAGGCTCCCCGAGACGAT	WT	TwoExp	id_uc001bbw.3_1052_WT	id_uc001bbw.3_1052_WT	id_uc001bbw.3_1052
ATGGGGTTCGGTATGCGCTGTCCTCTGCTGTGGCAAGAAGAATATCTGGTTAGACCCCAATGAGACCAATGAAATCACCAATGACCAAATCAAGGCTCCCCGAGACGAT	WT	TwoExp	id_uc011klk.1_536_WT	id_uc011klk.1_536_WT	id_uc011klk.1_536
ATGGGGTTCGGTATGCGCCCACATGTGCTGGGTAGAGGGGTCCAGCCTGTTCCAGCCAGTGCCTGAACCTGTCCCTGAGAAGGAGTCTCCTAAGGCTCCCCGAGACGAT	WT	PredictedTRUB1	id_uc002foj.3_1648_WT	id_uc002foj.3_1648_WT	id_uc002foj.3_1648
ATGGGGTTCGGTATGCGCGCCGCCTGGGAGCCGTCCGGCGCAGCAGTTTCTAGGTCCCCACTGTCCCCGCCGTCCCGCCCCTTAAGAAATAAAGGCTCCCCGAGACGAT	WT	Pus1	id_uc002yto.3_95_WT	id_uc002yto.3_95_WT	id_uc002yto.3_95
ATGGGGTTCGGTATGCGCCCGAGCTCTCCAAGTCCAACAAGCAGAACCTCTTCCTTGGCTCCCTCACCAGCCGCTTGTGGCCTTCCCAGAAAAGGCTCCCCGAGACGAT	WT	TwoExp	id_uc002olu.1_1455_WT	id_uc002olu.1_1455_WT	id_uc002olu.1_1455
ATGGGGTTCGGTATGCGCCGGACATCAGGACATCTCTTACTGGGAGTAGTTCGAATCTATCACAGGAAAGCCAAATACCTTCTAGGATAACAAGGCTCCCCGAGACGAT	WT	IdentifiedTRUB1	id_uc003yod.3_481_WT	id_uc003yod.3_481_WT	id_uc003yod.3_481
ATGGGGTTCGGTATGCGCCGGACATCAGGACATCTCTTACTGGGAGTAGTTCGAATCTATCACAGGAAAGCCAAATACCTTCTAGGATAACAAGGCTCCCCGAGACGAT	WT	TwoExp	id_uc003yod.3_481_WT	id_uc003yod.3_481_WT	id_uc003yod.3_481
ATGGGGTTCGGTATGCGCCGGACATCAGGACATCTCTTACTGGGAGTAGTTCGAATCTATCACAGGAAAGCCAAATACCTTCTTAGAGTGTAAGGCTCCCCGAGACGAT	WT	IdentifiedTRUB1	id_uc003yod.3_481_WT	id_uc003yod.3_481_WT	id_uc003yod.3_481
ATGGGGTTCGGTATGCGCCGGACATCAGGACATCTCTTACTGGGAGTAGTTCGAATCTATCACAGGAAAGCCAAATACCTTCTTAGAGTGTAAGGCTCCCCGAGACGAT	WT	TwoExp	id_uc003yod.3_481_WT	id_uc003yod.3_481_WT	id_uc003yod.3_481
ATGGGGTTCGGTATGCGCCAATCTCCAATAGACTTGTGTCTTCACCCTGCTGCATTGTGACCAGCACCTACGGCTGGACAGCCAAAATGGTAAGGCTCCCCGAGACGAT	WT	Dkc1	id_uc010iko.1_1388_WT	id_uc010iko.1_1388_WT	id_uc010iko.1_1388
ATGGGGTTCGGTATGCGCAGAGTCCGGGCACCTGTGCCTATGTGGAGGGTTCCAGCCCCAGCCAGGCCCCTCCGCTGCCCACATATCAGAAAAGGCTCCCCGAGACGAT	WT	PredictedTRUB1	id_uc003mbt.3_4675_WT	id_uc003mbt.3_4675_WT	id_uc003mbt.3_4675
ATGGGGTTCGGTATGCGCCCCAGCAAGCCACCCGAGGGGACTGCCTGGCCTTCCAGATGCGAGCTGGGTTGCTTCCCTGAGGGGCTCTGGGAAGGCTCCCCGAGACGAT	WT	TwoExp	id_uc001uef.3_1134_WT	id_uc001uef.3_1134_WT	id_uc001uef.3_1134
ATGGGGTTCGGTATGCGCTGTTAGGAGGGACTCTGAGCTTCACACCTGTCTGCTGCCATGGGTGCAGAGCCCTAGTCCTGATGTCGTGCGAAAGGCTCCCCGAGACGAT	WT	TwoExp	id_uc002jzx.2_306_WT	id_uc002jzx.2_306_WT	id_uc002jzx.2_306
ATGGGGTTCGGTATGCGCAGGTCTACAGGGAGCCTGTCTCATGGAGACTGTAGAGCTGTTGCAAGCAAAGGTGAGCGCCCTAGACGTGCAGAAGGCTCCCCGAGACGAT	WT	TwoExp	id_uc001som.1_915_WT	id_uc001som.1_915_WT	id_uc001som.1_915
ATGGGGTTCGGTATGCGCTCGGGGGGACATCGCCAACGCTGAGCCACAGTTCCAGCCTGCTGCACAGCCTGGGCTCTGTCACGCTTTCACAAAGGCTCCCCGAGACGAT	WT	TwoExp	id_uc002jnz.4_1477_WT	id_uc002jnz.4_1477_WT	id_uc002jnz.4_1477
ATGGGGTTCGGTATGCGCTCGGGGGGACATCGCCAACGCTGAGCCACAGTTCCAGCCTGCTGCACAGCCTGGGCTCTGTCACGCTTTCACAAAGGCTCCCCGAGACGAT	WT	PredictedTRUB1	id_uc002jnz.4_1477_WT	id_uc002jnz.4_1477_WT	id_uc002jnz.4_1477
ATGGGGTTCGGTATGCGCTCGGGGGGACATCGCCAACGCTGAGCCACAGTTCCAGCCTGCTGCACAGCCTGGGCTCTGTCACGGCGCATTTAAGGCTCCCCGAGACGAT	WT	TwoExp	id_uc002jnz.4_1477_WT	id_uc002jnz.4_1477_WT	id_uc002jnz.4_1477
ATGGGGTTCGGTATGCGCTCGGGGGGACATCGCCAACGCTGAGCCACAGTTCCAGCCTGCTGCACAGCCTGGGCTCTGTCACGGCGCATTTAAGGCTCCCCGAGACGAT	WT	PredictedTRUB1	id_uc002jnz.4_1477_WT	id_uc002jnz.4_1477_WT	id_uc002jnz.4_1477
ATGGGGTTCGGTATGCGCTTGCAAAGGATATTGCCAGGAGAAGCAAAACTTTTAATCCAGGTGCTGGTTTGCCAACTGACAAAGGGAGGACAAGGCTCCCCGAGACGAT	WT	Pus1	id_uc002bww.3_619_WT	id_uc002bww.3_619_WT	id_uc002bww.3_619
ATGGGGTTCGGTATGCGCCCCGGACCTTCATTGCTACCCCTGGCAGCAGTTCCAGTCTGTGCATCGTGAATGACGAGCTGTTTTACGCGCGAAGGCTCCCCGAGACGAT	WT	PredictedTRUB1	id_uc004eiv.4_3461_WT	id_uc004eiv.4_3461_WT	id_uc004eiv.4_3461
ATGGGGTTCGGTATGCGCTCTGAGAACAGTGAGGCTGGTCCTCGTGCCGTTCCAGCCGGTGCCCGGCCAGTGGGGAGGACACATTCCTAACAAGGCTCCCCGAGACGAT	WT	TwoExp	id_uc001acu.2_1505_WT	id_uc001acu.2_1505_WT	id_uc001acu.2_1505
ATGGGGTTCGGTATGCGCGACCTGAGGATTTGCAGCCCCCAGCCCTGGGTTCAAGTCCCAGCTCTACCCCTTCTTGGCCCCTAGATTCTAAAAGGCTCCCCGAGACGAT	WT	PredictedTRUB1	id_uc003mbz.4_747_WT	id_uc003mbz.4_747_WT	id_uc003mbz.4_747
ATGGGGTTCGGTATGCGCGGGCGCGAGGATGACGACCTCAGGCGCGCTCTTTCCAAGCCTGGTGCCAGGCTCTCGGGGCGCCTCTGTAGACAAGGCTCCCCGAGACGAT	WT	TwoExp	id_uc002yco.3_100_WT	id_uc002yco.3_100_WT	id_uc002yco.3_100
ATGGGGTTCGGTATGCGCGGCGCCTGCTGGTGGCTGAGCTGCAGCGTGGCTTCTTTGACAAGCACATCTGGCTCTCCATATGGCTCCGGGTAAGGCTCCCCGAGACGAT	WT	Pus1	id_uc002cos.1_9979_WT	id_uc002cos.1_9979_WT	id_uc002cos.1_9979
ATGGGGTTCGGTATGCGCCCTTCCAGGGGGTCTTCATCTTCGTCTTTCACTGCGCCTTACAGAAGAAGGTGCACAAGGAGTACAGACCGGTAAGGCTCCCCGAGACGAT	WT	Dkc1	id_uc010xnn.2_3589_WT	id_uc010xnn.2_3589_WT	id_uc010xnn.2_3589
ATGGGGTTCGGTATGCGCCTCTGCAGGTGGCGACCTGCACATGACCCAGTTTTTCCGAGGCAATCTGGCTGGCTTAACTCTCCCCATCTAAAAGGCTCCCCGAGACGAT	WT	TwoExp	id_uc001aqh.3_2361_WT	id_uc001aqh.3_2361_WT	id_uc001aqh.3_2361
ATGGGGTTCGGTATGCGCCCAAAGTGTGGGATGCTGTCTCAGGAGATGAATTGATGACCCTGGCTCATAAACACATTGTCAAGCAGACACTAAGGCTCCCCGAGACGAT	WT	TwoExp	id_uc001rdc.4_635_WT	id_uc001rdc.4_635_WT	id_uc001rdc.4_635
ATGGGGTTCGGTATGCGCTGGAGGCTGTGGCCCTCTACAACCCTGTGAGCTTTGCCTTTGAGGTGACTCAGGACTTCATGATGGAGGACCTAAGGCTCCCCGAGACGAT	WT	Pus1	id_uc021srk.1_849_WT	id_uc021srk.1_849_WT	id_uc021srk.1_849
ATGGGGTTCGGTATGCGCTGCAGCAGCTCAATGCCTACAACCGCACTCGGTATGAACTGCGGGAATTCCTGGAGGACACCTGTCCCACTATAAGGCTCCCCGAGACGAT	WT	TwoExp	id_uc002xbt.3_711_WT	id_uc002xbt.3_711_WT	id_uc002xbt.3_711
ATGGGGTTCGGTATGCGCCCGACCCGATCCTCATCTCACTGCGGGAGGCCTACGTGCCCAGCAAGCAGCGGGACCTGAAGATCTTAGACAGAAGGCTCCCCGAGACGAT	WT	TwoExp	id_uc001olk.1_1298_WT	id_uc001olk.1_1298_WT	id_uc001olk.1_1298
ATGGGGTTCGGTATGCGCCCAGTCCGTTCTGTCACCAGGCCCCTTCGGGTTCCACTCCCACATCCGTGGCCTCACCAGCTGCCGGTAACGAAAGGCTCCCCGAGACGAT	WT	PredictedTRUB1	id_uc001hqx.4_1906_WT	id_uc001hqx.4_1906_WT	id_uc001hqx.4_1906
ATGGGGTTCGGTATGCGCCCGAGGCGGGTGGATCACCTGAGGTCAGGAGTTCGAGACCAGCCTGACCAACATGGTGAAACCCCGAAATCGCAAGGCTCCCCGAGACGAT	WT	PredictedTRUB1	id_uc010dvo.2_1051_WT	id_uc010dvo.2_1051_WT	id_uc010dvo.2_1051
ATGGGGTTCGGTATGCGCGATGTTACTAATATGACTCATACAGATGCAGTTAATCTGCTCCGGGCTGCATCCAAAACAGTCAGTATAGTCAAAGGCTCCCCGAGACGAT	WT	Pus1	id_uc003hpy.3_6049_WT	id_uc003hpy.3_6049_WT	id_uc003hpy.3_6049
ATGGGGTTCGGTATGCGCGGAGCAGGGGCTCCCTGCAGACAGGGGGGGCCTTCGCCCTGGAAGCCTGGACGCCGAGATAGACTGGTGTAAAAAGGCTCCCCGAGACGAT	WT	TwoExp	id_uc022aiu.1_306_WT	id_uc022aiu.1_306_WT	id_uc022aiu.1_306
ATGGGGTTCGGTATGCGCACATTGCCCCTCAGTGTGGCTTCCTGTTGTGGTGCATGGCCCCGAGCCCTTCTAATGGGGCTGAAACCGAAAGAAGGCTCCCCGAGACGAT	WT	TwoExp	id_uc011cvx.1_883_WT	id_uc011cvx.1_883_WT	id_uc011cvx.1_883
ATGGGGTTCGGTATGCGCTCCCCCAGCAGGCCGTCATGCTGCATACTCTGTAGGTTGGGAGATGGCACCTGCGGGGGCACCTGAGCTCTTCAAGGCTCCCCGAGACGAT	WT	Pus1	id_uc009wtf.3_1104_WT	id_uc009wtf.3_1104_WT	id_uc009wtf.3_1104
ATGGGGTTCGGTATGCGCCGGCCGCCTTTGCCGCCTACTGAAGCCGGCGCTGCTCTGTGGGGCTCTGGCCGCGCCTGGCCTGGGGGCCACGAAGGCTCCCCGAGACGAT	WT	Pus1	id_uc021umf.1_149_WT	id_uc021umf.1_149_WT	id_uc021umf.1_149
ATGGGGTTCGGTATGCGCGCCGAAGCCCATGGTCCCTGGATAGCAAAGGTTCAAGTCCTGGAAGGGGCAGTTCTGTTGATGCACCCTTCAGAAGGCTCCCCGAGACGAT	WT	PredictedTRUB1	id_uc001gwc.3_8220_WT	id_uc001gwc.3_8220_WT	id_uc001gwc.3_8220
ATGGGGTTCGGTATGCGCCTTCACTCCCTCCCTTTGGCCACTGGCCCAGTTCCAGCCTCTGATTGTGGCAGCAGCTTCATACCCTCTAAAAAAGGCTCCCCGAGACGAT	WT	PredictedTRUB1	id_uc010roq.1_606_WT	id_uc010roq.1_606_WT	id_uc010roq.1_606
ATGGGGTTCGGTATGCGCCTGGGGGGCACTTCGGGCGCCGCAACAGCAGCTTCGAGAGCTGTGCCCAGGAGTGAACAACCAGCTGCTGACCAAGGCTCCCCGAGACGAT	WT	TwoExp	id_uc002slj.2_275_WT	id_uc002slj.2_275_WT	id_uc002slj.2_275
ATGGGGTTCGGTATGCGCTCCTCTCCATGCAGCCGCCTTCACAGACCATGTAGAGTGTTTACAGCTGCTGCTCAGCCATAATGTAATCTCGAAGGCTCCCCGAGACGAT	WT	Pus1	id_uc003caj.1_2651_WT	id_uc003caj.1_2651_WT	id_uc003caj.1_2651
ATGGGGTTCGGTATGCGCACCAAAGAAAGGAAGAATGCACTTTTCAGGATTAGAAGAGGCTGTGTATAGAAACATACAAGCTTAGTTTTTGAAGGCTCCCCGAGACGAT	WT	TwoExp	id_uc011acp.2_144_WT	id_uc011acp.2_144_WT	id_uc011acp.2_144
ATGGGGTTCGGTATGCGCGCAAGCAGCTGCGGTTTGCACTCAAGACCTACTTTCCTTACACTTCTCCATCTCTTGCCATGGTGCATGGTTGAAGGCTCCCCGAGACGAT	WT	Pus1	id_uc004avh.3_1284_WT	id_uc004avh.3_1284_WT	id_uc004avh.3_1284
ATGGGGTTCGGTATGCGCTGTGCACGTCTCATGCATTGAACCAGGATTGTTCAAAACAAACTTGGCAGATCCAGTAAAGGTAATATAGGCCAAGGCTCCCCGAGACGAT	WT	PredictedTRUB1	id_uc002uep.3_2131_WT	id_uc002uep.3_2131_WT	id_uc002uep.3_2131
ATGGGGTTCGGTATGCGCATCTTGGTGACTTTGGGATGCTGGTTTCATTGTAGGTATAATTATGCAAAGCAAAGAATCCAGGAGAATGGCGAAGGCTCCCCGAGACGAT	WT	TwoExp	id_uc001iar.3_610_WT	id_uc001iar.3_610_WT	id_uc001iar.3_610
ATGGGGTTCGGTATGCGCTGAATAGTTGAAATGTATATTTGTACAGTCTTTTAGACCTATTCAAGTGATGCTCATGATCCTGTGAAGCCCTAAGGCTCCCCGAGACGAT	WT	TwoExp	id_uc002xvu.1_3950_WT	id_uc002xvu.1_3950_WT	id_uc002xvu.1_3950
ATGGGGTTCGGTATGCGCGTTTGAACCCAGAACTCCAGATGAATTATACTTTGAGGAAGGTGATATTATCTACATTACTGACAATAGGCTAAAGGCTCCCCGAGACGAT	WT	Pus1	id_uc004ajv.4_310_WT	id_uc004ajv.4_310_WT	id_uc004ajv.4_310
ATGGGGTTCGGTATGCGCGGAACCTCCAGACAAGCTCTCAAGTCCATTTGTAGGAGAACATAGGGTAGTCAAGCTTCCAAGATTTTCACAAAAGGCTCCCCGAGACGAT	WT	TwoExp	id_uc003vgc.3_2220_WT	id_uc003vgc.3_2220_WT	id_uc003vgc.3_2220
ATGGGGTTCGGTATGCGCCATGGAGACCAAAGGTGCCAGCAGCCCTGGGATTCTCGTGCTGACCACGGGCCTGAGCAAACCCTCCCGCACTAAGGCTCCCCGAGACGAT	WT	Pus1	id_uc001vrs.2_1438_WT	id_uc001vrs.2_1438_WT	id_uc001vrs.2_1438
ATGGGGTTCGGTATGCGCGGACAACACACTATACACCTCTTGCATGTGGTTCAAATCCTCTGAAGAGAGAGATTGGGGACTATCCATTTCTAAGGCTCCCCGAGACGAT	WT	TwoExp	id_uc004fmm.3_437_WT	id_uc004fmm.3_437_WT	id_uc004fmm.3_437
ATGGGGTTCGGTATGCGCGGACAACACACTATACACCTCTTGCATGTGGTTCAAATCCTCTGAAGAGAGAGATTGGGGACTATCCATTTCTAAGGCTCCCCGAGACGAT	WT	PredictedTRUB1	id_uc004fmm.3_437_WT	id_uc004fmm.3_437_WT	id_uc004fmm.3_437
ATGGGGTTCGGTATGCGCGGACAACACACTATACACCTCTTGCATGTGGTTCAAATCCTCTGAAGAGAGAGATTGGGGACTATCGGGCTTGAAGGCTCCCCGAGACGAT	WT	TwoExp	id_uc004fmm.3_437_WT	id_uc004fmm.3_437_WT	id_uc004fmm.3_437
ATGGGGTTCGGTATGCGCGGACAACACACTATACACCTCTTGCATGTGGTTCAAATCCTCTGAAGAGAGAGATTGGGGACTATCGGGCTTGAAGGCTCCCCGAGACGAT	WT	PredictedTRUB1	id_uc004fmm.3_437_WT	id_uc004fmm.3_437_WT	id_uc004fmm.3_437
ATGGGGTTCGGTATGCGCCGTTTTCATCTCTACACGTTGAACGATGGGCATTTGATGTAGAACTACTGTACATAGCACAGTTCCCCTGCCTAAGGCTCCCCGAGACGAT	WT	TwoExp	id_uc001uvy.3_846_WT	id_uc001uvy.3_846_WT	id_uc001uvy.3_846
ATGGGGTTCGGTATGCGCATAAACACTAACCACCTCGACAAGCAACAGGTTCAACTCCTGGCAGAGATGTGTATCCTTATTGAACCTAATAAAGGCTCCCCGAGACGAT	WT	IdentifiedTRUB1	id_uc001iga.3_332_WT	id_uc001iga.3_332_WT	id_uc001iga.3_332
ATGGGGTTCGGTATGCGCATAAACACTAACCACCTCGACAAGCAACAGGTTCAACTCCTGGCAGAGATGTGTATCCTTATTGAACCTAATAAAGGCTCCCCGAGACGAT	WT	TwoExp	id_uc001iga.3_332_WT	id_uc001iga.3_332_WT	id_uc001iga.3_332
ATGGGGTTCGGTATGCGCATAAACACTAACCACCTCGACAAGCAACAGGTTCAACTCCTGGCAGAGATGTGTATCCTTATTGAGTGTGGGTAAGGCTCCCCGAGACGAT	WT	IdentifiedTRUB1	id_uc001iga.3_332_WT	id_uc001iga.3_332_WT	id_uc001iga.3_332
ATGGGGTTCGGTATGCGCATAAACACTAACCACCTCGACAAGCAACAGGTTCAACTCCTGGCAGAGATGTGTATCCTTATTGAGTGTGGGTAAGGCTCCCCGAGACGAT	WT	TwoExp	id_uc001iga.3_332_WT	id_uc001iga.3_332_WT	id_uc001iga.3_332
ATGGGGTTCGGTATGCGCCGTACTGACAGATTACTTTTAACTCCATGGGTTAAATTCCTGTGGGAGTCTTACAGGCAGTGTTTGTGGGAGTAAGGCTCCCCGAGACGAT	WT	TwoExp	id_uc001ldu.3_597_WT	id_uc001ldu.3_597_WT	id_uc001ldu.3_597
ATGGGGTTCGGTATGCGCGCAGGCACTTCAGAGCTTACCTTATGTGTTCATTCCACCTGATATCCAGACCCCAGAGTCATCGTGTGTCGCAAAGGCTCCCCGAGACGAT	WT	TwoExp	id_uc001qlh.3_627_WT	id_uc001qlh.3_627_WT	id_uc001qlh.3_627
ATGGGGTTCGGTATGCGCGGGAGGGAACACCATTCACAAAGGCTGACGGTTCCAGTCCGAAGTCGTGGGCCCACCAGGATGCTCTTCTCTCAAGGCTCCCCGAGACGAT	WT	PredictedTRUB1	id_uc002sin.1_2072_WT	id_uc002sin.1_2072_WT	id_uc002sin.1_2072
ATGGGGTTCGGTATGCGCCACTTCTCACCGAGATGATTCATGAAGCGGCTTACAGGGAGAACACAGTTGGCCTCCACCGTTTCGCGGAACAAAGGCTCCCCGAGACGAT	WT	TwoExp	id_uc004chl.3_646_WT	id_uc004chl.3_646_WT	id_uc004chl.3_646
ATGGGGTTCGGTATGCGCTCAAAGATAAGTGGATCCATTCTCAATGAACTTATTGGACTTGTGAGATCACCCTTATTGCAGGGCCGGAGGTAAGGCTCCCCGAGACGAT	WT	TwoExp	id_uc001stn.2_2652_WT	id_uc001stn.2_2652_WT	id_uc001stn.2_2652
ATGGGGTTCGGTATGCGCATTATTAGTTCACTTCCCTGCTGCCATGAAACTTTGCCTTAAGAAGGTGCTGGATTCCAAGGTTTGGGTCACGAAGGCTCCCCGAGACGAT	WT	Pus1	id_uc011cjx.2_5066_WT	id_uc011cjx.2_5066_WT	id_uc011cjx.2_5066
ATGGGGTTCGGTATGCGCCCTCAAAGTGGCTAGAAACTTGTCAGCATGAATCAGATGAGCAGCCTCTAGATCCAATTCCCCAATTTTAGGTAAGGCTCCCCGAGACGAT	WT	TwoExp	id_uc002hbq.3_382_WT	id_uc002hbq.3_382_WT	id_uc002hbq.3_382
ATGGGGTTCGGTATGCGCACCAACACTGAAATTCTGTGGCATCACATATATTGGGCCTTGATGTCATGACAGATCAAAATCATCGGAACATAAGGCTCCCCGAGACGAT	WT	Pus1	id_uc001pfu.3_2600_WT	id_uc001pfu.3_2600_WT	id_uc001pfu.3_2600
ATGGGGTTCGGTATGCGCAAACATTCTAGCGGCCATCGAGGGCTCCAGGTTCTACACCTCGGACCCCAGCCAGGCGTGCCTCTCAGTCATAAAGGCTCCCCGAGACGAT	WT	TwoExp	id_uc003yok.1_1202_WT	id_uc003yok.1_1202_WT	id_uc003yok.1_1202
ATGGGGTTCGGTATGCGCAAACATTCTAGCGGCCATCGAGGGCTCCAGGTTCTACACCTCGGACCCCAGCCAGGCGTGCCTCTCAGTCATAAAGGCTCCCCGAGACGAT	WT	IdentifiedTRUB1	id_uc003yok.1_1202_WT	id_uc003yok.1_1202_WT	id_uc003yok.1_1202
ATGGGGTTCGGTATGCGCAAACATTCTAGCGGCCATCGAGGGCTCCAGGTTCTACACCTCGGACCCCAGCCAGGCGTGCCTCTAGGTTTAAAAGGCTCCCCGAGACGAT	WT	TwoExp	id_uc003yok.1_1202_WT	id_uc003yok.1_1202_WT	id_uc003yok.1_1202
ATGGGGTTCGGTATGCGCAAACATTCTAGCGGCCATCGAGGGCTCCAGGTTCTACACCTCGGACCCCAGCCAGGCGTGCCTCTAGGTTTAAAAGGCTCCCCGAGACGAT	WT	IdentifiedTRUB1	id_uc003yok.1_1202_WT	id_uc003yok.1_1202_WT	id_uc003yok.1_1202
ATGGGGTTCGGTATGCGCTTGAATATACTTTTTCAAACAAAGTTTCATGTTCTAATCATTGTCTGATTTCAGCATTAAATGAACCCGCTTTAAGGCTCCCCGAGACGAT	WT	PredictedTRUB1	id_uc002sux.1_2909_WT	id_uc002sux.1_2909_WT	id_uc002sux.1_2909
ATGGGGTTCGGTATGCGCACTCCTCATCCATTTTCTCCTTCAGTCTATGTTCTACCCATGATAAATTGCTATTTTCCTCCCAAAATGCGGCAAGGCTCCCCGAGACGAT	WT	PredictedTRUB1	id_uc003tds.1_158_WT	id_uc003tds.1_158_WT	id_uc003tds.1_158
ATGGGGTTCGGTATGCGCTGGGTGGGGGCTACCACCCACCCTCTCAGTCTTGTGAAGAGTCTGGGACCTCCTTCTTCCCCACTCTTTGCATAAGGCTCCCCGAGACGAT	WT	TwoExp	id_uc002nan.3_7266_WT	id_uc002nan.3_7266_WT	id_uc002nan.3_7266
ATGGGGTTCGGTATGCGCACATATATATAAAAAGGTTTGATCCATCAAGCTTGGCTCATGGGATCTGCTGCTGCATTAAATCGAGGACACTAAGGCTCCCCGAGACGAT	WT	TwoExp	id_uc003fdn.3_1986_WT	id_uc003fdn.3_1986_WT	id_uc003fdn.3_1986
ATGGGGTTCGGTATGCGCCTTCCATACCATCCCTCCAGGGATGCCTGAGTTCCAGTCTGAGGGTCACTGCACTTTGGAGTGCCTGCCGAAAAAGGCTCCCCGAGACGAT	WT	TwoExp	id_uc003qde.3_1098_WT	id_uc003qde.3_1098_WT	id_uc003qde.3_1098
ATGGGGTTCGGTATGCGCCTTCCATACCATCCCTCCAGGGATGCCTGAGTTCCAGTCTGAGGGTCACTGCACTTTGGAGTGCCTGCCGAAAAAGGCTCCCCGAGACGAT	WT	IdentifiedTRUB1	id_uc003qde.3_1098_WT	id_uc003qde.3_1098_WT	id_uc003qde.3_1098
ATGGGGTTCGGTATGCGCCTTCCATACCATCCCTCCAGGGATGCCTGAGTTCCAGTCTGAGGGTCACTGCACTTTGGAGTGCCCGTATACTAAGGCTCCCCGAGACGAT	WT	TwoExp	id_uc003qde.3_1098_WT	id_uc003qdf.3_1173_WT	id_uc003qdf.3_1173
ATGGGGTTCGGTATGCGCCTTCCATACCATCCCTCCAGGGATGCCTGAGTTCCAGTCTGAGGGTCACTGCACTTTGGAGTGCCCGTATACTAAGGCTCCCCGAGACGAT	WT	IdentifiedTRUB1	id_uc003qde.3_1098_WT	id_uc003qdf.3_1173_WT	id_uc003qdf.3_1173
ATGGGGTTCGGTATGCGCAATGCTATAGACTTTTCTGCAGGAATGACGTGTATATTCCTCACTGGCATTTACCAAAAATAAATGACGAGTCAAGGCTCCCCGAGACGAT	WT	TwoExp	id_uc010xph.2_5046_WT	id_uc010xph.2_5046_WT	id_uc010xph.2_5046
ATGGGGTTCGGTATGCGCTGGCCAATCACTGGTGTCACCGGGCAGCTGTCTAGAGGACTTCCGCGCCACACCATTCATCGAATAGTCCGGTAAGGCTCCCCGAGACGAT	WT	TwoExp	id_uc001vqx.3_5230_WT	id_uc001vqx.3_5230_WT	id_uc001vqx.3_5230
ATGGGGTTCGGTATGCGCGTAGTGAGTGTGGAAAAGTCTTCTCTAAGAGTTCAACTCTTAATAAACATCAGAAAATTCATAATAAGTCTGCAAGGCTCCCCGAGACGAT	WT	PredictedTRUB1	id_uc003mjo.2_873_WT	id_uc003mjo.2_873_WT	id_uc003mjo.2_873
ATGGGGTTCGGTATGCGCACAAAAGATTTAAACCATTGTGATGGCGTATATTCTCAAATGGTAATATCTTGCAATGGCACACATACCTTTAAAGGCTCCCCGAGACGAT	WT	Pus1	id_uc001ztr.3_2632_WT	id_uc001ztr.3_2632_WT	id_uc001ztr.3_2632
ATGGGGTTCGGTATGCGCGTATCTATAGGTAAATCTCAAGGGTAAAATGTTAGGTGTTGACATTGAGAACCCTGAAACCCCATCTACGACGAAGGCTCCCCGAGACGAT	WT	TwoExp	id_uc003mzk.4_799_WT	id_uc003mzk.4_799_WT	id_uc003mzk.4_799
ATGGGGTTCGGTATGCGCATTGGACGAGACTGGGAAACCAAAAACTTTGATTTTGAGGATGTTTTTGTGAAGATTCCCCAAGCTCGCGGCTAAGGCTCCCCGAGACGAT	WT	Pus1	id_uc001qnc.3_450_WT	id_uc001qnc.3_450_WT	id_uc001qnc.3_450
ATGGGGTTCGGTATGCGCGGGGACAGCCTCTTCCTGAGGAAAGCTGAGGATTTTGGAAATCGGCTAATGCCTGCCTTCAGAACGCGGTTATAAGGCTCCCCGAGACGAT	WT	TwoExp	id_uc004cld.2_1107_WT	id_uc004cld.2_1107_WT	id_uc004cld.2_1107
ATGGGGTTCGGTATGCGCGACCACCAACGTGGCCGGCCTCTCCTCTGAGTTCTACACCACCTTCAAGGCTTGTGAGCAGTTTCTGGAAACGAAGGCTCCCCGAGACGAT	WT	PredictedTRUB1	id_uc001cxj.2_1785_WT	id_uc001cxj.2_1785_WT	id_uc001cxj.2_1785
ATGGGGTTCGGTATGCGCGCGGCCTCCAGGTGGTGGATCCAATTTTTCATTAGGTTTTGATGAACCAACAGAACAACCTGTGAGATTTACAAAGGCTCCCCGAGACGAT	WT	TwoExp	id_uc002jmz.1_474_WT	id_uc002jmz.1_474_WT	id_uc002jmz.1_474
ATGGGGTTCGGTATGCGCGGGAGGGAAAGCAAGCCTGGCAGAGGCACCCATTCCATTCCCAGCTTGCTCCGTAGCTGGTGATTAAAATTTAAAGGCTCCCCGAGACGAT	WT	TwoExp	id_uc003eme.1_693_WT	id_uc003eme.1_693_WT	id_uc003eme.1_693
ATGGGGTTCGGTATGCGCGGGAGGGAAAGCAAGCCTGGCAGAGGCACCCATTCCATTCCCAGCTTGCTCCGTAGCTGGCGATTGCTACTAAAAGGCTCCCCGAGACGAT	WT	TwoExp	id_uc003bxl.3_87_WT	id_uc003bxl.3_87_WT	id_uc003bxl.3_87
ATGGGGTTCGGTATGCGCGCAACAGGCGTGGGTCACGCTCTCGCTCGGTCTTTCTGCCGCCATCTTGGTTCCGCGTTCCCTGCAGTCTCTGAAGGCTCCCCGAGACGAT	WT	TwoExp	id_uc001sma.2_246_WT	id_uc001sma.2_246_WT	id_uc001sma.2_246
ATGGGGTTCGGTATGCGCAAGCATATCAGGTTAGAACTCTCATCACATGTTCGACTCAAATTGTGGAGCAAAAGAGTAAATAACTAGATGAAAGGCTCCCCGAGACGAT	WT	PredictedTRUB1	id_uc021zhr.1_1149_WT	id_uc021zhr.1_1149_WT	id_uc021zhr.1_1149
ATGGGGTTCGGTATGCGCCATTTGGAACAACAGCTGGTTTCTCTGGAATATTCTCAAACTTCCTGTTCAGACGCTGCTTCAAGTTCCGATCAAGGCTCCCCGAGACGAT	WT	TwoExp	id_uc001pap.3_293_WT	id_uc001pap.3_293_WT	id_uc001pap.3_293
ATGGGGTTCGGTATGCGCCCCCTGCCCTTCTATCTGGGAGCTAGGGAAGGTATGGGGGAGGAAAGAGAATGGATTTATAGCTAAACCCTCAAAGGCTCCCCGAGACGAT	WT	TwoExp	id_uc001rsy.3_1252_WT	id_uc001rsy.3_1252_WT	id_uc001rsy.3_1252
ATGGGGTTCGGTATGCGCAATTGAGCCTTGCTGAAATTTATGAACAGGAGTACATCAAACTCAACCAGCAAAAAACAGCAGAATAAGTCTCAAGGCTCCCCGAGACGAT	WT	TwoExp	id_uc002sht.2_1782_WT	id_uc002sht.2_1782_WT	id_uc002sht.2_1782
ATGGGGTTCGGTATGCGCGACATAGATCTTGATACCGAAACAGAACAAGTTAAAGGCTTGTTCTAAGTGGACAAGGCTCTCACAGGAGCATAAGGCTCCCCGAGACGAT	WT	TwoExp	id_uc021zgs.1_3070_WT	id_uc021zgs.1_3070_WT	id_uc021zgs.1_3070
ATGGGGTTCGGTATGCGCGCTGAAGCTGTAGGAAGCGCCATTCTTCCCTGTATCTAACTGGGGCTGTGATCAAGAAGGTTCTGAGATGCTGAAGGCTCCCCGAGACGAT	WT	TwoExp	id_uc002iuv.4_1505_WT	id_uc002iuv.4_1505_WT	id_uc002iuv.4_1505
ATGGGGTTCGGTATGCGCCCCATGCGCCATCTCGAGGCCAAGCTGAAAGTTCTACTCTTTCTAGTGGAATATCAATAGGTAGCAGTTCGAAAAGGCTCCCCGAGACGAT	WT	PredictedTRUB1	id_uc001glz.3_1504_WT	id_uc001glz.3_1504_WT	id_uc001glz.3_1504
ATGGGGTTCGGTATGCGCCCAGCAGGAGGCTGATGAAGGACAACCCTCCATATGATAAGGGAGCCTTCAGAATCGAAATCAACCACGTCCGAAGGCTCCCCGAGACGAT	WT	TwoExp	id_uc011aig.2_118_WT	id_uc011aig.2_118_WT	id_uc011aig.2_118
ATGGGGTTCGGTATGCGCGAGAAACTTAACTCCTTGTGCATGGCCTGGCTTGTGGATCATGTATATGCCATCCGCGAGGCAGCAGGGTCGGAAGGCTCCCCGAGACGAT	WT	TwoExp	id_uc002pyp.3_1649_WT	id_uc002pyp.3_1649_WT	id_uc002pyp.3_1649
ATGGGGTTCGGTATGCGCATAAAGAAAATATTATGATATCTTGGAAAGGTTCTATTCCTGATCTCCAGCTGTGGTGAGCAAGTATCACGTCAAGGCTCCCCGAGACGAT	WT	PredictedTRUB1	id_uc021xbn.1_3368_WT	id_uc021xbn.1_3368_WT	id_uc021xbn.1_3368
ATGGGGTTCGGTATGCGCCTGTGAAGCAGCAGTTTACCGAGGAAGAAATATACAAAGACAGGGATAGCCAGATCACAGCCATTGATTGACTAAGGCTCCCCGAGACGAT	WT	TwoExp	id_uc002old.3_681_WT	id_uc002old.3_681_WT	id_uc002old.3_681
ATGGGGTTCGGTATGCGCCAAGGAGGATGCCTTCTCCGGGACAGATTGGATGTTGGAGAAAATGGATTTGAAGGAGTTCGACTATACTACAAAGGCTCCCCGAGACGAT	WT	TwoExp	id_uc003axz.3_535_WT	id_uc003axz.3_535_WT	id_uc003axz.3_535
ATGGGGTTCGGTATGCGCAGCATGGCCCCTTCCTGATTGCCAATGTGTTATACCTGGAGTCCCCAGCTGGGGTGGGCTTCTCCCGGCGGAAAAGGCTCCCCGAGACGAT	WT	TwoExp	id_uc010zxi.2_751_WT	id_uc010zxi.2_751_WT	id_uc010zxi.2_751
ATGGGGTTCGGTATGCGCTGAGCCAGATGACGCCACAGAGACCCGCCTCTTCCCTGAACGCGGGTCGGTGTGGAGTCAGTGACCATGACGGAAGGCTCCCCGAGACGAT	WT	Pus1	id_uc003ejg.3_7519_WT	id_uc003ejg.3_7519_WT	id_uc003ejg.3_7519
ATGGGGTTCGGTATGCGCCTTGGCTTCCCTCTCCCTGCGGCAGGAGAGCCTGTCCCGCCTCCTGTCCACCTGTGGCCTCGTCCAGTGTCCAAAGGCTCCCCGAGACGAT	WT	CTGsites	id_uc003bcp.3_788_WT	id_uc003bcp.3_788_WT	id_uc003bcp.3_788
ATGGGGTTCGGTATGCGCCTTGGCTTCCCTCTCCCTGCGGCAGGAGAGCCTGTCCCGCCTCCTGTCCACCTGTGGCCTCGTCCACCATTTAAAGGCTCCCCGAGACGAT	WT	CTGsites	id_uc003bcp.3_788_WT	id_uc003bcp.3_788_WT	id_uc003bcp.3_788
ATGGGGTTCGGTATGCGCGGCACCACCACAGCTGCCCACTTCTGGAAGGTTCCATCCCCTGCAGGCCTGGTCTCTAGAAGCTCCCGGGCGTAAGGCTCCCCGAGACGAT	WT	PredictedTRUB1	id_uc003nog.1_330_WT	id_uc003nog.1_330_WT	id_uc003nog.1_330
ATGGGGTTCGGTATGCGCAGTTTTAATAACATTCTTTTTTCTTTAAGGGGTTTGTTAAAGTTGTTAAGAATAAGGCCTACTTTTAATCCCAAAGGCTCCCCGAGACGAT	WT	TwoExp	id_uc001dpb.3_1034_WT	id_uc001dpb.3_1034_WT	id_uc001dpb.3_1034
ATGGGGTTCGGTATGCGCATATTTGTAAAATTATATTTAATGGAATTCTTTTCTTTGATTATCAAGGACTTTCACTGCAGGCAATGCAACAAAGGCTCCCCGAGACGAT	WT	Pus1	id_uc002kzb.3_3295_WT	id_uc002kzb.3_3295_WT	id_uc002kzb.3_3295
ATGGGGTTCGGTATGCGCATGAACCCAATTCTCCTATTCGATCAAGTGCATTTGACAGAAAAGTTCAGTTTCTTGGGAAGAAAATGGACTCAAGGCTCCCCGAGACGAT	WT	Pus1	id_uc010nej.2_643_WT	id_uc010nej.2_643_WT	id_uc010nej.2_643
ATGGGGTTCGGTATGCGCTCTAAGGGTTTAACCCCTTAGCCTACCATCTCTATAGCCCCAGCTCCCTCACAGGCCACACACACCTGGAGGTAAGGCTCCCCGAGACGAT	WT	TwoExp	id_uc002xhl.3_3746_WT	id_uc002xhl.3_3746_WT	id_uc002xhl.3_3746
ATGGGGTTCGGTATGCGCCAGACAGCTACCGTGGCCTTTGATAATGTGCATTTTGAATACATTGAGGGCCAGAAAGTCCTTAGAGATGGGAAAGGCTCCCCGAGACGAT	WT	Pus1	id_uc004ebz.3_1463_WT	id_uc004ebz.3_1463_WT	id_uc004ebz.3_1463
ATGGGGTTCGGTATGCGCCATTCATCAGACTTTTCAACTAATATTTAATATTCTCATAAACGGTGATGGCACTCTAACTAGAACGACATCAAAGGCTCCCCGAGACGAT	WT	Pus1	id_uc003dxb.4_992_WT	id_uc003dxb.4_992_WT	id_uc003dxb.4_992
ATGGGGTTCGGTATGCGCAGAGAGTGAAGACTATAATCTCTACAATCAGTTCAAGTCTGCACCATCTGACAGTTTAACATACAAAGGCACAAAGGCTCCCCGAGACGAT	WT	PredictedTRUB1	id_uc002tuj.3_1387_WT	id_uc002tuj.3_1387_WT	id_uc002tuj.3_1387
ATGGGGTTCGGTATGCGCATAACAATCCAGTGGTGGTGCTAGAGAATGAATTGATGTATGGGGTTCCTTTTGAATTTCCTCCGTTACCGTCAAGGCTCCCCGAGACGAT	WT	Pus1	id_uc003dkf.4_654_WT	id_uc003dkf.4_654_WT	id_uc003dkf.4_654
ATGGGGTTCGGTATGCGCTGGCTGGTATCTGGGGGGCAGTCAGGGCTGGTTCGAATCCATTTTGTCCGTGGACTCGCCTCCCCAGTTATGCAAGGCTCCCCGAGACGAT	WT	IdentifiedTRUB1	id_uc002rjw.1_2871_WT	id_uc002rjw.1_2871_WT	id_uc002rjw.1_2871
ATGGGGTTCGGTATGCGCTGGCTGGTATCTGGGGGGCAGTCAGGGCTGGTTCGAATCCATTTTGTCCGTGGACTCGCCTCCCCAGTTATGCAAGGCTCCCCGAGACGAT	WT	TwoExp	id_uc002rjw.1_2871_WT	id_uc002rjw.1_2871_WT	id_uc002rjw.1_2871
ATGGGGTTCGGTATGCGCTGGCTGGTATCTGGGGGGCAGTCAGGGCTGGTTCGAATCCATTTTGTCCGTGGACTCGCCTCCCCCCTAGCATAAGGCTCCCCGAGACGAT	WT	IdentifiedTRUB1	id_uc002rjw.1_2871_WT	id_uc010eyy.1_1110_WT	id_uc010eyy.1_1110
ATGGGGTTCGGTATGCGCTGGCTGGTATCTGGGGGGCAGTCAGGGCTGGTTCGAATCCATTTTGTCCGTGGACTCGCCTCCCCCCTAGCATAAGGCTCCCCGAGACGAT	WT	TwoExp	id_uc002rjw.1_2871_WT	id_uc010eyy.1_1110_WT	id_uc010eyy.1_1110
ATGGGGTTCGGTATGCGCATCAACTCTTATCCCCAACAGCTGCCTAATTTTAGGAGTCTGACCCTCCACATCTCACTGGTGTGTGGACGCAAAGGCTCCCCGAGACGAT	WT	Pus1	id_uc003igg.3_2727_WT	id_uc003igg.3_2727_WT	id_uc003igg.3_2727
ATGGGGTTCGGTATGCGCATCAACTCTTATCCCCAACAGCTGCCTAATTTTAGGAGTCTGACCCTCCACATCTCACTGGTGTGTGGACGCAAAGGCTCCCCGAGACGAT	WT	TwoExp	id_uc003igg.3_2727_WT	id_uc003igg.3_2727_WT	id_uc003igg.3_2727
ATGGGGTTCGGTATGCGCATCAACTCTTATCCCCAACAGCTGCCTAATTTTAGGAGTCTGACCCTCCACATCTCACTGGTGTGTCACAGACAAGGCTCCCCGAGACGAT	WT	Pus1	id_uc003igg.3_2727_WT	id_uc003igg.3_2727_WT	id_uc003igg.3_2727
ATGGGGTTCGGTATGCGCATCAACTCTTATCCCCAACAGCTGCCTAATTTTAGGAGTCTGACCCTCCACATCTCACTGGTGTGTCACAGACAAGGCTCCCCGAGACGAT	WT	TwoExp	id_uc003igg.3_2727_WT	id_uc003igg.3_2727_WT	id_uc003igg.3_2727
ATGGGGTTCGGTATGCGCATATTCCTAGTTATTTGTCATCTCAGGGAACGTTAGCTGACAGGCAGGATGGGTACGTGTCTTCAAGATTCCGAAGGCTCCCCGAGACGAT	WT	Pus1	id_uc001sqr.3_2837_WT	id_uc001sqr.3_2837_WT	id_uc001sqr.3_2837
ATGGGGTTCGGTATGCGCACATTTTGATTCACCACCACATCTTCTTGATATCTACCCAAGAACACCACATCCCCATGAGGAAAGAATACATAAGGCTCCCCGAGACGAT	WT	Pus1	id_uc001tba.3_1332_WT	id_uc001tba.3_1332_WT	id_uc001tba.3_1332
ATGGGGTTCGGTATGCGCTCCTATATACTTCCGTTTGCCTCGCGGTTTCTTTCTTTCCGCGCCGATAGCGCTCACGCAAGCATTGTCCTGAAAGGCTCCCCGAGACGAT	WT	TwoExp	id_uc022cah.1_125_WT	id_uc022cah.1_125_WT	id_uc022cah.1_125
ATGGGGTTCGGTATGCGCGCTCTCAGAGGTGGAAGAGCAAGGCTGGAAGTTCTAACCTTCTCAGTACATGGTTGGTTTTTCCTGGCTGGGTAAGGCTCCCCGAGACGAT	WT	PredictedTRUB1	id_uc001tcu.3_2302_WT	id_uc001tcu.3_2302_WT	id_uc001tcu.3_2302
ATGGGGTTCGGTATGCGCAATCATTGGACTCATGGTGGGCGGTGTTGTCATAGCGACAGTGATCGTCATCACCTTGGTGATGCGGGCACTTAAGGCTCCCCGAGACGAT	WT	TwoExp	id_uc002ylz.3_2336_WT	id_uc002ylz.3_2336_WT	id_uc002ylz.3_2336
ATGGGGTTCGGTATGCGCTGCCTCTGAGAACTTACGCAGATCAGCCGAGCTTTATTGAACAACTCTCATTATTACCATATGGCCCTATGCTAAGGCTCCCCGAGACGAT	WT	TwoExp	id_uc011kmi.2_232_WT	id_uc011kmi.2_232_WT	id_uc011kmi.2_232
ATGGGGTTCGGTATGCGCGCAGAGGCTTACCTGAATCTGGGGCCAGCTCTTTCAGCAGCACTTGCGTCATCTCAGAAACAGCAGAACCTGGAAGGCTCCCCGAGACGAT	WT	TwoExp	id_uc003yqc.2_596_WT	id_uc003yqc.2_596_WT	id_uc003yqc.2_596
ATGGGGTTCGGTATGCGCAACCTGGACTTCTTCCTAAGTGTGGCTCAAGTTCAACTCTTACATCAGTTAATAGTAGCAAATATGGTTCGGGAAGGCTCCCCGAGACGAT	WT	PredictedTRUB1	id_uc003yiv.3_5341_WT	id_uc003yiv.3_5341_WT	id_uc003yiv.3_5341
ATGGGGTTCGGTATGCGCGCAGTGATGATCCAGAACTATGTGCTGTGACGTTCGTGGACAGGCCAGTTATTGGCTCATCTGTGCCCGCCATAAGGCTCCCCGAGACGAT	WT	TwoExp	id_uc003cfi.1_2030_WT	id_uc003cfi.1_2030_WT	id_uc003cfi.1_2030
ATGGGGTTCGGTATGCGCGACTATAGATCAAAATGTGAAACATTTTATGTTCAATCCATATTTGTCTTGCACATTATAAATATGATCACAAAAGGCTCCCCGAGACGAT	WT	PredictedTRUB1	id_uc002lfc.4_3193_WT	id_uc002lfc.4_3193_WT	id_uc002lfc.4_3193
ATGGGGTTCGGTATGCGCTCCAGAATATATGGAAAAGATAAAACAGCGTTTGTTTGAAAATTTGCGCATGTTACCTCATGCACGATGGCGGAAGGCTCCCCGAGACGAT	WT	Dkc1	id_uc003pwc.2_1294_WT	id_uc003pwc.2_1294_WT	id_uc003pwc.2_1294
ATGGGGTTCGGTATGCGCGGCCAGGATGTCAGGGCGGAAGTGAAAGAGGTTCCATCCCTTTGCTGGTTAAAAACTCCACCTGCTGGGCCCCAAGGCTCCCCGAGACGAT	WT	PredictedTRUB1	id_uc002rmt.2_119_WT	id_uc002rmt.2_119_WT	id_uc002rmt.2_119
ATGGGGTTCGGTATGCGCAGGAACAGCAGAGAAGCTCAAGCCAGAGGATATTACTCAGATCCAACCACAGCAGTTGGTTTTGCGACGTACTAAGGCTCCCCGAGACGAT	WT	TwoExp	id_uc001iwt.4_554_WT	id_uc001iwt.4_554_WT	id_uc001iwt.4_554
ATGGGGTTCGGTATGCGCCCCGCATGTCCACAGCCGGGCACCGTCCCCACTCTACAGCGTGGAGTTCTCCGAGGAGCCCTTCGGGTAGATTAAGGCTCCCCGAGACGAT	WT	TwoExp	id_uc002jxq.3_726_WT	id_uc002jxq.3_726_WT	id_uc002jxq.3_726
ATGGGGTTCGGTATGCGCGAGATCTGCCATCCCAGCTCTTTGAGCCCAGTTCCAACCTTGGCCCCAATCAGAACTCAGCGGTGTAATATACAAGGCTCCCCGAGACGAT	WT	PredictedTRUB1	id_uc021tid.1_3335_WT	id_uc021tid.1_3335_WT	id_uc021tid.1_3335
ATGGGGTTCGGTATGCGCCCAGGTATGGGCCAGCAGTTTCCTGCCAGATATTGCCCAGCGTGAGGAGCGATCTCAGCAGGCCTGGCACTAGAAGGCTCCCCGAGACGAT	WT	Pus1	id_uc003zve.3_661_WT	id_uc003zve.3_661_WT	id_uc003zve.3_661
ATGGGGTTCGGTATGCGCCACGGGAAGCGATGATAACTGCGCGGCATTCTTTGAGGGACCCCCATTCAAGTTCAAGTTCACAACCCAACGTAAGGCTCCCCGAGACGAT	WT	Pus1	id_uc021xlv.1_805_WT	id_uc021xlv.1_805_WT	id_uc021xlv.1_805
ATGGGGTTCGGTATGCGCCATCTGCTTCAGCCGCTCCCTCCACTACCAGTTCTACGTCTGGTATTTCCACACACTGCCCTACCAACCGGTTAAGGCTCCCCGAGACGAT	WT	IdentifiedTRUB1	id_uc003fne.2_1111_WT	id_uc003fne.2_1111_WT	id_uc003fne.2_1111
ATGGGGTTCGGTATGCGCCATCTGCTTCAGCCGCTCCCTCCACTACCAGTTCTACGTCTGGTATTTCCACACACTGCCCTACCAACCGGTTAAGGCTCCCCGAGACGAT	WT	TwoExp	id_uc003fne.2_1111_WT	id_uc003fne.2_1111_WT	id_uc003fne.2_1111
ATGGGGTTCGGTATGCGCCATCTGCTTCAGCCGCTCCCTCCACTACCAGTTCTACGTCTGGTATTTCCACACACTGCCCTACCACGACCCCAAGGCTCCCCGAGACGAT	WT	IdentifiedTRUB1	id_uc003fne.2_1111_WT	id_uc003fne.2_1111_WT	id_uc003fne.2_1111
ATGGGGTTCGGTATGCGCCATCTGCTTCAGCCGCTCCCTCCACTACCAGTTCTACGTCTGGTATTTCCACACACTGCCCTACCACGACCCCAAGGCTCCCCGAGACGAT	WT	TwoExp	id_uc003fne.2_1111_WT	id_uc003fne.2_1111_WT	id_uc003fne.2_1111
ATGGGGTTCGGTATGCGCCTGCATACAAGTTGGCAGGACCATGGCCAACCTGGAGCGCACCTTCATCGCCATCAAGCCGGACGGGTGAGCTAAGGCTCCCCGAGACGAT	WT	CTGsites	id_uc002itj.3_488_WT	id_uc002itj.3_488_WT	id_uc002itj.3_488
ATGGGGTTCGGTATGCGCCTGCATACAAGTTGGCAGGACCATGGCCAACCTGGAGCGCACCTTCATCGCCATCAAGCCGGACGTTTAGGGCAAGGCTCCCCGAGACGAT	WT	CTGsites	id_uc002itj.3_488_WT	id_uc002itj.3_488_WT	id_uc002itj.3_488
ATGGGGTTCGGTATGCGCAGCCACGAACTGGGCCCCTCCCTGCGCCGGAATGTGGGCTTCCAGGTGCGGTTGGAAAGTAAGCCCACTGACCAAGGCTCCCCGAGACGAT	WT	TwoExp	id_uc003cru.3_1969_WT	id_uc003cru.3_1969_WT	id_uc003cru.3_1969
ATGGGGTTCGGTATGCGCTGACTGTGCCTTTCTTTCTGCATTTGGGGATGTTTCAAAACCGGAAAGATATAGTGGCGACAACATGAAGCAGAAGGCTCCCCGAGACGAT	WT	TwoExp	id_uc004bam.3_802_WT	id_uc004bam.3_802_WT	id_uc004bam.3_802
ATGGGGTTCGGTATGCGCGGTCGGGCCTGCCTGTGAGCAAACGAGGCCCCTGAGAGCTCCACCTAGTTCACAGGATAAAATCCGTCTTCCTAAGGCTCCCCGAGACGAT	WT	CTGsites	id_uc003joc.3_97_WT	id_uc003joc.3_97_WT	id_uc003joc.3_97
ATGGGGTTCGGTATGCGCGGTCGGGCCTGCCTGTGAGCAAACGAGGCCCCTGAGAGCTCCACCTAGTTCACAGGATAAAATCCCACGGCCTAAGGCTCCCCGAGACGAT	WT	CTGsites	id_uc003joc.3_97_WT	id_uc003joc.3_97_WT	id_uc003joc.3_97
ATGGGGTTCGGTATGCGCTTCACGGAAGCCAGGAATCAAACTGCCTGGGTTCCAGTCCCAGCTCTGCCAGTTATGCCCAGCTGATAGGACAAAGGCTCCCCGAGACGAT	WT	PredictedTRUB1	id_uc002qkv.3_3380_WT	id_uc002qkv.3_3380_WT	id_uc002qkv.3_3380
ATGGGGTTCGGTATGCGCGGCTCAGATTTATTTTTTCCTAACAAACTGGTTCTAGTCCACTCAAGATTCTATCCAAAAAGCAGAAACGTATAAGGCTCCCCGAGACGAT	WT	PredictedTRUB1	id_uc021pod.1_5786_WT	id_uc021pod.1_5786_WT	id_uc021pod.1_5786
ATGGGGTTCGGTATGCGCCCGCAGCCAGGGGGGCGGGGCCTGTCGCGACGTGAACGAGTGCGCCGAGGGCAGCCCCTGCTCGCGGTTGCCGAAGGCTCCCCGAGACGAT	WT	TwoExp	id_uc001oej.3_2504_WT	id_uc001oej.3_2504_WT	id_uc001oej.3_2504
ATGGGGTTCGGTATGCGCACCTTGCCGAAGATCAGAGTCCTCGGGCATTCTTCCTAACACCACAGACATGAGATTGCGACCAGGCGTGTCCAAGGCTCCCCGAGACGAT	WT	TwoExp	id_uc002iux.3_564_WT	id_uc002iux.3_564_WT	id_uc002iux.3_564
ATGGGGTTCGGTATGCGCCTGCGACTACGAGCCCGGCTCTGAGTACAACCTTGACTCTATTGCCCAGAGCTGCCTGAACCTGGTGATCACGAAGGCTCCCCGAGACGAT	WT	Pus1	id_uc002pgy.3_485_WT	id_uc002pgy.3_485_WT	id_uc002pgy.3_485
ATGGGGTTCGGTATGCGCAGCCTTCCTGACCATTGTCTGCATGGAAGAGTTTGAGGACATGGAGAGAAGTCTGCCACTATGCCTGACTCATAAGGCTCCCCGAGACGAT	WT	Pus1	id_uc002nic.1_529_WT	id_uc002nic.1_529_WT	id_uc002nic.1_529
ATGGGGTTCGGTATGCGCAGCCTTCCTGACCATTGTCTGCATGGAAGAGTTTGAGGACATGGAGAGAAGTCTGCCACTATGCCTGACTCATAAGGCTCCCCGAGACGAT	WT	TwoExp	id_uc002nic.1_529_WT	id_uc002nic.1_529_WT	id_uc002nic.1_529
ATGGGGTTCGGTATGCGCAGCCTTCCTGACCATTGTCTGCATGGAAGAGTTTGAGGACATGGAGAGAAGTCTGCCACTATGCCGACCCGAAAAGGCTCCCCGAGACGAT	WT	Pus1	id_uc002nic.1_529_WT	id_uc002nic.1_529_WT	id_uc002nic.1_529
ATGGGGTTCGGTATGCGCAGCCTTCCTGACCATTGTCTGCATGGAAGAGTTTGAGGACATGGAGAGAAGTCTGCCACTATGCCGACCCGAAAAGGCTCCCCGAGACGAT	WT	TwoExp	id_uc002nic.1_529_WT	id_uc002nic.1_529_WT	id_uc002nic.1_529
ATGGGGTTCGGTATGCGCCGGGACGGCACGGTTGCCCCAGCTGGGCACTGTAGGTCAATCTCCCTACACGAGCGCCCCGCCGCGTATCTAAAAGGCTCCCCGAGACGAT	WT	TwoExp	id_uc003myr.3_354_WT	id_uc003myr.3_354_WT	id_uc003myr.3_354
ATGGGGTTCGGTATGCGCTGAAAACAAACATGTTGTTGCAGCTTGATGGTTCAACTCCAATTTGTGAAGATATTGGTAGGCAAAGATACTGAAGGCTCCCCGAGACGAT	WT	TwoExp	id_uc003vbk.1_1278_WT	id_uc003vbl.3_1278_WT	id_uc003vbl.3_1278
ATGGGGTTCGGTATGCGCTGAAAACAAACATGTTGTTGCAGCTTGATGGTTCAACTCCAATTTGTGAAGATATTGGTAGGCAAAGATACTGAAGGCTCCCCGAGACGAT	WT	IdentifiedTRUB1	id_uc003vbk.1_1278_WT	id_uc003vbl.3_1278_WT	id_uc003vbl.3_1278
ATGGGGTTCGGTATGCGCTGAAAACAAACATGTTGTTGCAGCTTGATGGTTCAACTCCAATTTGTGAAGATATTGGTAGGCAAATCGCGCGAAGGCTCCCCGAGACGAT	WT	TwoExp	id_uc003vbk.1_1278_WT	id_uc003vbk.1_1278_WT	id_uc003vbk.1_1278
ATGGGGTTCGGTATGCGCTGAAAACAAACATGTTGTTGCAGCTTGATGGTTCAACTCCAATTTGTGAAGATATTGGTAGGCAAATCGCGCGAAGGCTCCCCGAGACGAT	WT	IdentifiedTRUB1	id_uc003vbk.1_1278_WT	id_uc003vbk.1_1278_WT	id_uc003vbk.1_1278
ATGGGGTTCGGTATGCGCAAAGGAAATTGACCATAAGGAATCAAAATGGATTGATGATGAAGAATTCCTTATTAAAATAGCTGTTAGATGTAAGGCTCCCCGAGACGAT	WT	Pus1	id_uc003grk.2_1126_WT	id_uc003grk.2_1126_WT	id_uc003grk.2_1126
ATGGGGTTCGGTATGCGCTCAAAGCGAATTACCACGTTTAATTGATCCAATAACTTGACCAACGGAACAAGTTACCCTAGGGATGACTATTAAGGCTCCCCGAGACGAT	WT	TwoExp	id_uc001miq.3_1222_WT	id_uc001miq.3_1222_WT	id_uc001miq.3_1222
ATGGGGTTCGGTATGCGCCATGGTACATGCTGCCCGGGGCAAGTGGGGAATTAAAGCAAACTGCCCTTGTATCAGTCGACAGAAGCCTGAGAAGGCTCCCCGAGACGAT	WT	Pus1	id_uc003lcy.1_3560_WT	id_uc003lcy.1_3560_WT	id_uc003lcy.1_3560
ATGGGGTTCGGTATGCGCTGCAAAATGCTTCCAAAGCCACCTTAGCCTGTTCTATTCAGCGGCAACCCCAAAGCACCTGTTAAGGTTTGACAAGGCTCCCCGAGACGAT	WT	TwoExp	id_uc002jwe.3_2245_WT	id_uc002jwf.3_2507_WT	id_uc002jwf.3_2507
ATGGGGTTCGGTATGCGCTGCAAAATGCTTCCAAAGCCACCTTAGCCTGTTCTATTCAGCGGCAACCCCAAAGCACCTGTTAAGGTTTGACAAGGCTCCCCGAGACGAT	WT	IdentifiedTRUB1	id_uc002jwe.3_2245_WT	id_uc002jwf.3_2507_WT	id_uc002jwf.3_2507
ATGGGGTTCGGTATGCGCTGCAAAATGCTTCCAAAGCCACCTTAGCCTGTTCTATTCAGCGGCAACCCCAAAGCACCTGTTAACATTTGATAAGGCTCCCCGAGACGAT	WT	TwoExp	id_uc002jwe.3_2245_WT	id_uc002jwe.3_2245_WT	id_uc002jwe.3_2245
ATGGGGTTCGGTATGCGCTGCAAAATGCTTCCAAAGCCACCTTAGCCTGTTCTATTCAGCGGCAACCCCAAAGCACCTGTTAACATTTGATAAGGCTCCCCGAGACGAT	WT	IdentifiedTRUB1	id_uc002jwe.3_2245_WT	id_uc002jwe.3_2245_WT	id_uc002jwe.3_2245
ATGGGGTTCGGTATGCGCAAAAACTGGGAGATTTTCTGCAGAAATTGAGTTCCAGCCTCTCTCGAACCTGGGAAGACCTGGCAAGTTTGGAAAGGCTCCCCGAGACGAT	WT	PredictedTRUB1	id_uc002kex.3_1827_WT	id_uc002kex.3_1827_WT	id_uc002kex.3_1827
ATGGGGTTCGGTATGCGCTGTCACAGACACCACTGCCTTGATCACCTGGTTCAAGCCCCTGGCTGAGATCGATGGCATTGAGCTGATACCTAAGGCTCCCCGAGACGAT	WT	PredictedTRUB1	id_uc004bjj.4_2884_WT	id_uc004bjj.4_2884_WT	id_uc004bjj.4_2884
ATGGGGTTCGGTATGCGCCACTGTGGGAGCATCAGGCAGACAGCCACCATTCTGAGCATGGACAAGGACTGTCTGCGCACTGGTGTTTACCAAGGCTCCCCGAGACGAT	WT	TwoExp	id_uc003awg.3_1727_WT	id_uc003awg.3_1727_WT	id_uc003awg.3_1727
ATGGGGTTCGGTATGCGCCCGCTGGGGGGACTCCGTACTCCTCGTGGACTTAACACACGAGGAGATGCCACAGAGCATCGTGGCGCATCTTAAGGCTCCCCGAGACGAT	WT	TwoExp	id_uc002mnn.3_953_WT	id_uc002mnn.3_953_WT	id_uc002mnn.3_953
ATGGGGTTCGGTATGCGCGCAAGCAGCCCAAGCAGGTGGAAGTAGAGCTTTTGTCCCGGCAGAGCGGGCTCTCTGGCCGCCAGGCTTCACGAAGGCTCCCCGAGACGAT	WT	Dkc1	id_uc001evy.3_734_WT	id_uc001evy.3_734_WT	id_uc001evy.3_734
ATGGGGTTCGGTATGCGCACATATGTTCAACGGCCACAGTACCCTGACCATGCAAAGGTAGCATAATCACTTGTTCCTTAAATACGTGATGAAGGCTCCCCGAGACGAT	WT	TwoExp	id_uc003vzz.2_887_WT	id_uc003vzz.2_887_WT	id_uc003vzz.2_887
ATGGGGTTCGGTATGCGCAGTCCTGCTGGGCAAGAGCCGGGAACAGAGGTTCGACCCCTCTGCCTCTCTGGACTTCCTCTGGGTTAGAATGAAGGCTCCCCGAGACGAT	WT	TwoExp	id_uc003skn.2_5168_WT	id_uc003skn.2_5168_WT	id_uc003skn.2_5168
ATGGGGTTCGGTATGCGCAGTCCTGCTGGGCAAGAGCCGGGAACAGAGGTTCGACCCCTCTGCCTCTCTGGACTTCCTCTGGGTTAGAATGAAGGCTCCCCGAGACGAT	WT	IdentifiedTRUB1	id_uc003skn.2_5168_WT	id_uc003skn.2_5168_WT	id_uc003skn.2_5168
ATGGGGTTCGGTATGCGCAGTCCTGCTGGGCAAGAGCCGGGAACAGAGGTTCGACCCCTCTGCCTCTCTGGACTTCCTCTGGGCGGGAGGAAAGGCTCCCCGAGACGAT	WT	TwoExp	id_uc003skn.2_5168_WT	id_uc003skn.2_5168_WT	id_uc003skn.2_5168
ATGGGGTTCGGTATGCGCAGTCCTGCTGGGCAAGAGCCGGGAACAGAGGTTCGACCCCTCTGCCTCTCTGGACTTCCTCTGGGCGGGAGGAAAGGCTCCCCGAGACGAT	WT	IdentifiedTRUB1	id_uc003skn.2_5168_WT	id_uc003skn.2_5168_WT	id_uc003skn.2_5168
ATGGGGTTCGGTATGCGCTCGCCGGCCTCCTAGGGCTGTGCTGTTTTGTTTTGACCCTCGCATTGTGCAGAATTAAAGTGCAGTGCTTTCGAAGGCTCCCCGAGACGAT	WT	Pus1	id_uc001ymz.4_631_WT	id_uc001ymz.4_631_WT	id_uc001ymz.4_631
ATGGGGTTCGGTATGCGCCGAAACGCTGCCCCCCGCACCCCGGCGGCGCCTGCCAGTCCGGCCGCGGTGCCCTCGGAGGGCAGAATAACACAAGGCTCCCCGAGACGAT	WT	CTGsites	id_uc002wjk.3_670_WT	id_uc002wjk.3_670_WT	id_uc002wjk.3_670
ATGGGGTTCGGTATGCGCCGAAACGCTGCCCCCCGCACCCCGGCGGCGCCTGCCAGTCCGGCCGCGGTGCCCTCGGAGGGCAGAGGGAGACAAGGCTCCCCGAGACGAT	WT	CTGsites	id_uc002wjk.3_670_WT	id_uc002wjk.3_670_WT	id_uc002wjk.3_670
ATGGGGTTCGGTATGCGCTTTAGTAGTATTTCAGTTATTTATTGCTGTGTTCAAACCACCCCCAAAATATAATGACTTAAAACACGATTGAAAGGCTCCCCGAGACGAT	WT	PredictedTRUB1	id_uc011boq.2_2510_WT	id_uc011boq.2_2510_WT	id_uc011boq.2_2510
ATGGGGTTCGGTATGCGCTTGGAAATCTTGCTCCGGAGGTCCGAAACACGTATTTTAAGCGTGCCCTTCCTCACCTCCTGGAGATAGATTAAAGGCTCCCCGAGACGAT	WT	TwoExp	id_uc001cqk.4_565_WT	id_uc001cqk.4_565_WT	id_uc001cqk.4_565
ATGGGGTTCGGTATGCGCGGAAAATGCCTTGGGGGCCATCTCCCTGGAGTTCGAATCTACTTTGCCCACCAAGTTCATGGTGGCTAGAAGGAAGGCTCCCCGAGACGAT	WT	PredictedTRUB1	id_uc002jkf.3_1085_WT	id_uc002jkf.3_1085_WT	id_uc002jkf.3_1085
ATGGGGTTCGGTATGCGCTAAGGTTTTAATTCATTTGAATCACTTATGAATTGATGATATACAGCAATTACTTTTCAAAATTAAAGTTGGCAAGGCTCCCCGAGACGAT	WT	Pus1	id_uc003exj.2_698_WT	id_uc003exj.2_698_WT	id_uc003exj.2_698
ATGGGGTTCGGTATGCGCAAGGGAGGAACTGGTGACAGATAGACCAGGGTTCAAGTCCCTGCCCTACCCACCATTTAGCTGCCTAAAAGAAAAGGCTCCCCGAGACGAT	WT	PredictedTRUB1	id_uc010ysb.1_1113_WT	id_uc010ysb.1_1113_WT	id_uc010ysb.1_1113
ATGGGGTTCGGTATGCGCGACATAATTTTTTAAATTGCTGATGAACCCAATAACCCTAATGTAGCTGAGCAGTGCAACATAGTTGAAGCACAAGGCTCCCCGAGACGAT	WT	TwoExp	id_uc009znj.1_894_WT	id_uc009znj.1_894_WT	id_uc009znj.1_894
ATGGGGTTCGGTATGCGCCTGTCTACCCTGCCCCTTGTCTTTTGAGAAGTTCAAACCTTCAGAAAAGTTGCAAGAACACGAGGGACACATTAAGGCTCCCCGAGACGAT	WT	TwoExp	id_uc021oge.1_627_WT	id_uc021oge.1_627_WT	id_uc021oge.1_627
ATGGGGTTCGGTATGCGCACCCCAAGAGTGGCCGTTCCTACCACGAGGAGTTCAACCCTCCAAAAGAGCCCATGAAAGATGACCTACGCAGAAGGCTCCCCGAGACGAT	WT	TwoExp	id_uc001bwp.2_550_WT	id_uc001bwp.2_550_WT	id_uc001bwp.2_550
ATGGGGTTCGGTATGCGCTGGCAGGAGGGTGGATTGTTGGTCTCAGTCAGTGGTGGGACAGACCAGAGCTCCGAACACTTCAGAATCTCTTAAGGCTCCCCGAGACGAT	WT	TwoExp	id_uc002hqy.1_1385_WT	id_uc002hqy.1_1385_WT	id_uc002hqy.1_1385
ATGGGGTTCGGTATGCGCTCCACTCTGGACAGCGCCAGGAGGCCCTGGGTTCCATTCCTAACTCTGCCTCAAACTGTACATTTCCACTTTCAAGGCTCCCCGAGACGAT	WT	IdentifiedTRUB1	id_uc001ofy.4_1976_WT	id_uc001ofy.4_1976_WT	id_uc001ofy.4_1976
ATGGGGTTCGGTATGCGCCTGGAAGTGAATGGAAACTATGCTCGCTTGGTTCTAGACCAAGTTCATACTGCATCGGGCACAGCTAAGACTAAAGGCTCCCCGAGACGAT	WT	IdentifiedTRUB1	id_uc003izf.3_11967_WT	id_uc003izf.3_11967_WT	id_uc003izf.3_11967
ATGGGGTTCGGTATGCGCCTGGAAGTGAATGGAAACTATGCTCGCTTGGTTCTAGACCAAGTTCATACTGCATCGGGCACAGCTAAGACTAAAGGCTCCCCGAGACGAT	WT	TwoExp	id_uc003izf.3_11967_WT	id_uc003izf.3_11967_WT	id_uc003izf.3_11967
ATGGGGTTCGGTATGCGCCTGGAAGTGAATGGAAACTATGCTCGCTTGGTTCTAGACCAAGTTCATACTGCATCGGGCACAGCCTCGCCAAAAGGCTCCCCGAGACGAT	WT	IdentifiedTRUB1	id_uc003izf.3_11967_WT	id_uc003izf.3_11967_WT	id_uc003izf.3_11967
ATGGGGTTCGGTATGCGCCTGGAAGTGAATGGAAACTATGCTCGCTTGGTTCTAGACCAAGTTCATACTGCATCGGGCACAGCCTCGCCAAAAGGCTCCCCGAGACGAT	WT	TwoExp	id_uc003izf.3_11967_WT	id_uc003izf.3_11967_WT	id_uc003izf.3_11967
ATGGGGTTCGGTATGCGCGATTGATAATAAGGTTTAAATGCTTCAAAAGTTCTAAGCTTAGATGCTTGGAAACAAAATTTGACTGTGAGGAAAGGCTCCCCGAGACGAT	WT	PredictedTRUB1	id_uc003yak.1_2084_WT	id_uc003yak.1_2084_WT	id_uc003yak.1_2084
ATGGGGTTCGGTATGCGCTAGTCTCTCTGGAATAAGTTTGCAGAAAAAACTTCAGCATGTGCCAGGAACACAACCTCACCTTGTCTATATGAAGGCTCCCCGAGACGAT	WT	TwoExp	id_uc011lrn.2_970_WT	id_uc011lrn.2_970_WT	id_uc011lrn.2_970
ATGGGGTTCGGTATGCGCTAGTCTCTCTGGAATAAGTTTGCAGAAAAAACTTCAGCATGTGCCAGGAACACAACCTCACCTTGTCTATATGAAGGCTCCCCGAGACGAT	WT	TwoExp	id_uc011lrn.2_970_WT	id_uc011lrn.2_970_WT	id_uc011lrn.2_970
ATGGGGTTCGGTATGCGCTAGTCTCTCTGGAATAAGTTTGCAGAAAAAACTTCAGCATGTGCCAGGAACACAACCTCACCTTGCAGCTCCTAAGGCTCCCCGAGACGAT	WT	TwoExp	id_uc011lrn.2_970_WT	id_uc011lro.2_970_WT	id_uc011lro.2_970
ATGGGGTTCGGTATGCGCTAGTCTCTCTGGAATAAGTTTGCAGAAAAAACTTCAGCATGTGCCAGGAACACAACCTCACCTTGCAGCTCCTAAGGCTCCCCGAGACGAT	WT	TwoExp	id_uc011lrn.2_970_WT	id_uc011lro.2_970_WT	id_uc011lro.2_970
ATGGGGTTCGGTATGCGCAACACTTGTTAAATGGTGATAATATGAGGTGTTCAGTGAATGCGACTCCTCAGCAGATGCCTCAGTCCCATGGAAGGCTCCCCGAGACGAT	WT	TwoExp	id_uc009xhv.2_2414_WT	id_uc009xhv.2_2414_WT	id_uc009xhv.2_2414
ATGGGGTTCGGTATGCGCATATGAACCTGAATGAGGAGAAACAGCAACCTTTGAGGGAGAAGGACATCATCATCAAGAGGGAGAGATGCGAAAGGCTCCCCGAGACGAT	WT	Pus1	id_uc003llb.4_479_WT	id_uc003llb.4_479_WT	id_uc003llb.4_479
ATGGGGTTCGGTATGCGCCTCTACTCCAGTGTTTGGGGGGATCCTATCCTTGATCAATGAGCACAGGATCCTTAGTGGCCGCCGAGCCAGCAAGGCTCCCCGAGACGAT	WT	TwoExp	id_uc001mel.1_1522_WT	id_uc001mel.1_1522_WT	id_uc001mel.1_1522
ATGGGGTTCGGTATGCGCCTGATGATATCAGTTTAAGTCTGGGCCAAAGTTCTAGTCTTTGTAAGGAAGGAAGTGAAGAACAAGCATCGTAAAGGCTCCCCGAGACGAT	WT	PredictedTRUB1	id_uc001xmo.2_1018_WT	id_uc001xmo.2_1018_WT	id_uc001xmo.2_1018
ATGGGGTTCGGTATGCGCTGTGGACGCCCAGGTGCAGACGGAGGCCCCCGTGCCTGTCAGCGTGCAGCCCCCGTCCCAGTATGCGGCAGCAAAGGCTCCCCGAGACGAT	WT	TwoExp	id_uc004bvq.1_403_WT	id_uc004bvq.1_403_WT	id_uc004bvq.1_403
ATGGGGTTCGGTATGCGCTTTCAAATGGAAGACCAATAAACAGATCCAGTTCAATCCTGGACAGACTACAGCCACATGGAGGGGCTCTAGGAAGGCTCCCCGAGACGAT	WT	PredictedTRUB1	id_uc021xsj.1_5496_WT	id_uc021xsj.1_5496_WT	id_uc021xsj.1_5496
ATGGGGTTCGGTATGCGCCCCTGGGGGCCAGGCTGACTTGGGGGGCAGACTTGACACTAGGCCCCACTCACTCAGATGTCCTGGAGACAGAAAGGCTCCCCGAGACGAT	WT	Pus1	id_uc002csv.4_813_WT	id_uc002csv.4_813_WT	id_uc002csv.4_813
ATGGGGTTCGGTATGCGCGAGGACTCACTGGAGGAATGTGCCATCACTTGTTCAAATAGCCACGGCCCTTGTGACTCCAACCAATCCAAGTAAGGCTCCCCGAGACGAT	WT	TwoExp	id_uc009wkf.1_493_WT	id_uc009wkf.1_493_WT	id_uc009wkf.1_493
ATGGGGTTCGGTATGCGCGCCGTCCCCGAAGGCGAGTCGCCGGCCGGGGCTGGCACGGGCGCCGCGGCGGGGGCTGGAGGCGCCCGCTTGAAAGGCTCCCCGAGACGAT	WT	CTGsites	id_uc003miu.3_354_WT	id_uc003miu.3_354_WT	id_uc003miu.3_354
ATGGGGTTCGGTATGCGCGCCGTCCCCGAAGGCGAGTCGCCGGCCGGGGCTGGCACGGGCGCCGCGGCGGGGGCTGGAGGCGCCCAAGCCAAAGGCTCCCCGAGACGAT	WT	CTGsites	id_uc003miu.3_354_WT	id_uc003miu.3_354_WT	id_uc003miu.3_354
ATGGGGTTCGGTATGCGCTGGCGCTCCCTGCGGGCCCCGCCGAGGCCGCCTGCGCCCTGTGCCAGCGCGCGCCCCGGGAACCGCGCTACCTAAGGCTCCCCGAGACGAT	WT	CTGsites	id_uc001htb.3_157_WT	id_uc001htb.3_157_WT	id_uc001htb.3_157
ATGGGGTTCGGTATGCGCTGGCGCTCCCTGCGGGCCCCGCCGAGGCCGCCTGCGCCCTGTGCCAGCGCGCGCCCCGGGAACCGTCGTGGTTAAGGCTCCCCGAGACGAT	WT	CTGsites	id_uc001htb.3_157_WT	id_uc001htb.3_157_WT	id_uc001htb.3_157
ATGGGGTTCGGTATGCGCACGTGGCTTCAGGGCGTTTCCCATTGACCAGTTTGACCCTGGTTTGAATAAAGAGAAGTGCGTTTGTCTTCGGAAGGCTCCCCGAGACGAT	WT	TwoExp	id_uc002lsn.3_2144_WT	id_uc002lsn.3_2144_WT	id_uc002lsn.3_2144
ATGGGGTTCGGTATGCGCCAGCAGGGCTCCTGGGATAACTCAGGCATAGTTCAACACTATGGGTCCTCCTCTGAAGCTCTTCATGAAATCAAAGGCTCCCCGAGACGAT	WT	PredictedTRUB1	id_uc004epc.2_185_WT	id_uc004epc.2_185_WT	id_uc004epc.2_185
ATGGGGTTCGGTATGCGCGTATTGCAATGGTGTCCTGGAGCCTCTGTACCTGTGCCCAAATGGTGCCCGCTGTGCCACCTGGTTACGCAAAAAGGCTCCCCGAGACGAT	WT	TwoExp	id_uc010wiy.1_370_WT	id_uc010wiy.1_370_WT	id_uc010wiy.1_370
ATGGGGTTCGGTATGCGCTAAGCCAGGCTCTGGAGCTAAGCTGCATGGGTTCAAATCCCAGCTCCAGCATTCAGCCTACAGAGAGTATGCTAAGGCTCCCCGAGACGAT	WT	PredictedTRUB1	id_uc002oxm.4_1368_WT	id_uc002oxm.4_1368_WT	id_uc002oxm.4_1368
ATGGGGTTCGGTATGCGCCACGTGCTGCGGCAGGTGGACGTCACGTCCTTTGCAGGTCACCCCTGCACCCGGGCCTCAGGCCATAACCCGAAAGGCTCCCCGAGACGAT	WT	TwoExp	id_uc001ack.2_5490_WT	id_uc001ack.2_5490_WT	id_uc001ack.2_5490
ATGGGGTTCGGTATGCGCTGGAAGATAATGCTTCTGATACAGTTGAAAGTTCGAGCCTTCAGGGAGAGTTGGAACCAGCATCAGATGTGATAAGGCTCCCCGAGACGAT	WT	PredictedTRUB1	id_uc001hxi.2_4151_WT	id_uc001hxi.2_4151_WT	id_uc001hxi.2_4151
ATGGGGTTCGGTATGCGCTCCCTTTCCTGCTGCAGGGCGAGGCCGGTCTGTAGCGGATCACTTCCTTTCGCCCACACATTGGCGCACATGCAAGGCTCCCCGAGACGAT	WT	TwoExp	id_uc001rey.3_314_WT	id_uc001rey.3_314_WT	id_uc001rey.3_314
ATGGGGTTCGGTATGCGCAATACATCTAAAACAAAGGAAACATATGTGGTTCAATTCCACCAAGGGATACTACGAGGCCGTGCGGGCTTTCAAGGCTCCCCGAGACGAT	WT	PredictedTRUB1	id_uc002qeu.1_2667_WT	id_uc002qeu.1_2667_WT	id_uc002qeu.1_2667
ATGGGGTTCGGTATGCGCACTGACAGGGGCTCCTGTCCTGTAAAATGGCATTTGAATCTCGTTCTTTGTGTCCTTACTTTCTGTGTACCCAAAGGCTCCCCGAGACGAT	WT	TwoExp	id_uc004ezo.3_1406_WT	id_uc004ezo.3_1406_WT	id_uc004ezo.3_1406
ATGGGGTTCGGTATGCGCGCTGGTCCACGGCCTGGCTTTCTGGTTTGACGTTGCTTTCATCGGCTCCATAATGACCGTGTGGCACGACCAAAAGGCTCCCCGAGACGAT	WT	TwoExp	id_uc002mpz.3_1305_WT	id_uc002mpz.3_1305_WT	id_uc002mpz.3_1305
ATGGGGTTCGGTATGCGCGAGCCTTGAGCTTGCCCACAGAGCCTTCTGGTTCCACCCCAGAGGGGCCGTTTTCAGACTCCCAAGGAACCGTAAGGCTCCCCGAGACGAT	WT	PredictedTRUB1	id_uc002lve.1_2597_WT	id_uc002lve.1_2597_WT	id_uc002lve.1_2597
ATGGGGTTCGGTATGCGCCGGTAAAGAAAGAAGAGAAGTGTGTGCCGCCTTACGTCCAAATCCGAGATCTCCACGGGATCCTCAGCAGCGCAAGGCTCCCCGAGACGAT	WT	TwoExp	id_uc001iij.3_6360_WT	id_uc001iij.3_6360_WT	id_uc001iij.3_6360
ATGGGGTTCGGTATGCGCTCTTGAGGTTCTGGACTTGACGTACAACAACTTGAGCGAAAATTCTCTTCCTGGAAACTTCTTCTCTCACTAGAAGGCTCCCCGAGACGAT	WT	TwoExp	id_uc001iol.3_506_WT	id_uc001iol.3_506_WT	id_uc001iol.3_506
ATGGGGTTCGGTATGCGCCTTCCTCAACTCCTGCCACAAGGTGATGGAGTTCAAGTCTCTGCTGCTGTCTCTGTGCTTGTTCCGCGCAGTGAAGGCTCCCCGAGACGAT	WT	PredictedTRUB1	id_uc003ddv.3_3316_WT	id_uc003ddv.3_3316_WT	id_uc003ddv.3_3316
ATGGGGTTCGGTATGCGCGAGGCTGTAGGCTGTGCCTGTCGCCCCCTACCTTCCTAATGGCTCCTCCTCTGAGGAGTGAAAGGTCGCCTATAAGGCTCCCCGAGACGAT	WT	TwoExp	id_uc003bdl.1_1301_WT	id_uc003bdl.1_1301_WT	id_uc003bdl.1_1301
ATGGGGTTCGGTATGCGCAACCTCTGTCTCCCTCAGACACTGACCACTACTTTCTGCGCTATGCTGTGCTGCCGCGGGAGGTGGCCGGCTAAAGGCTCCCCGAGACGAT	WT	TwoExp	id_uc010ghe.2_488_WT	id_uc010ghe.2_488_WT	id_uc010ghe.2_488
ATGGGGTTCGGTATGCGCTTTATTAATTTATAAGCAGAACAGGCCAGAGTTCTAGGCTCTGTTTCTAGGTGCTGTTTTCAAAAGGCAGGTTAAGGCTCCCCGAGACGAT	WT	PredictedTRUB1	id_uc003mec.1_1736_WT	id_uc003mec.1_1736_WT	id_uc003mec.1_1736
ATGGGGTTCGGTATGCGCTCAGAGATACCATCAGAGAACAAACACTAATGTTAATTGCCCAATTGAGTGCTTCATGCCTTTAGACGACCTCAAGGCTCCCCGAGACGAT	WT	TwoExp	id_uc002vfa.3_7634_WT	id_uc002vfa.3_7634_WT	id_uc002vfa.3_7634
ATGGGGTTCGGTATGCGCTGAGGTGTTTGCACTGCCGCTGGCCCACCTGCTGCAGACGCAGAATCAGGGCTATACCCACTTCTCGGCGCGGAAGGCTCCCCGAGACGAT	WT	TwoExp	id_uc001omn.3_541_WT	id_uc001omn.3_541_WT	id_uc001omn.3_541
ATGGGGTTCGGTATGCGCGGCTGGCCATGTAAGATCGTGGAGATGTCTGCTTCGAAGACTGGCAAGCACGGCCACGCCAAGGTATACACCGAAGGCTCCCCGAGACGAT	WT	TwoExp	id_uc009xrx.3_185_WT	id_uc009xrx.3_185_WT	id_uc009xrx.3_185
ATGGGGTTCGGTATGCGCACAGACAACCCAATGGCAGGGCCTGGGGGAGTTCTAACCTCCCGTGCCCAAGCCTGACTTCCCTTGGTAATTCAAGGCTCCCCGAGACGAT	WT	PredictedTRUB1	id_uc002hbf.2_4626_WT	id_uc002hbf.2_4626_WT	id_uc002hbf.2_4626
ATGGGGTTCGGTATGCGCTAAAATTAGAGGAACTAATTGACTCTCTGGGTTCTAACCCCTTCTTAACAAGGAATCAGATTCCCATCGGGCCAAGGCTCCCCGAGACGAT	WT	TwoExp	id_uc003znk.3_1968_WT	id_uc003znk.3_1968_WT	id_uc003znk.3_1968
ATGGGGTTCGGTATGCGCTAAAATTAGAGGAACTAATTGACTCTCTGGGTTCTAACCCCTTCTTAACAAGGAATCAGATTCCCATCGGGCCAAGGCTCCCCGAGACGAT	WT	IdentifiedTRUB1	id_uc003znk.3_1968_WT	id_uc003znk.3_1968_WT	id_uc003znk.3_1968
ATGGGGTTCGGTATGCGCTAAAATTAGAGGAACTAATTGACTCTCTGGGTTCTAACCCCTTCTTAACAAGGAATCAGATTCCCTGAACGAAAAGGCTCCCCGAGACGAT	WT	TwoExp	id_uc003znk.3_1968_WT	id_uc003znk.3_1968_WT	id_uc003znk.3_1968
ATGGGGTTCGGTATGCGCTAAAATTAGAGGAACTAATTGACTCTCTGGGTTCTAACCCCTTCTTAACAAGGAATCAGATTCCCTGAACGAAAAGGCTCCCCGAGACGAT	WT	IdentifiedTRUB1	id_uc003znk.3_1968_WT	id_uc003znk.3_1968_WT	id_uc003znk.3_1968
ATGGGGTTCGGTATGCGCGGGAGCCTGGCCAAAATGGAAAACTGCAAGGTTCAAATCCTGGAGTGCAGAAGAAGCATTAGGCATGCGGTACAAGGCTCCCCGAGACGAT	WT	PredictedTRUB1	id_uc002btn.3_921_WT	id_uc002btn.3_921_WT	id_uc002btn.3_921
ATGGGGTTCGGTATGCGCGTTAAGTAGTGCTTGAGAAAAAGGACTCTGGTTCAAATCCAGGTTCCATTTTGCTATCTTTGTGAGTGTCCAGAAGGCTCCCCGAGACGAT	WT	PredictedTRUB1	id_uc003hcj.1_1003_WT	id_uc003hcj.1_1003_WT	id_uc003hcj.1_1003
ATGGGGTTCGGTATGCGCTGCCGCTTCCACCACAGTTTGAAGAAAACAGGTCTGAAACAAGGTCTTACCCCCAGCTGCTTCTGCACCGATTAAGGCTCCCCGAGACGAT	WT	Dkc1	id_uc002wdx.1_184_WT	id_uc002wdx.1_184_WT	id_uc002wdx.1_184
ATGGGGTTCGGTATGCGCTTGCCTTGTTGTCACAAGAGGACTACTGCTGTTCAAGTCATCACTTCCACATTCCAGAAGGAAGATGGGTCTTAAGGCTCCCCGAGACGAT	WT	PredictedTRUB1	id_uc003cmy.1_3502_WT	id_uc003cmy.1_3502_WT	id_uc003cmy.1_3502
ATGGGGTTCGGTATGCGCCTAAAATATTTTAGTCAGAAACAAGATGTTGTTCTAATCAAGAATCTACTTATCAGTGTACAAAGCTCGTCTCAAGGCTCCCCGAGACGAT	WT	PredictedTRUB1	id_uc003pcy.4_12889_WT	id_uc003pcy.4_12889_WT	id_uc003pcy.4_12889
ATGGGGTTCGGTATGCGCGCTGGCCACCTCCAGCTCCTGCATCGAGTCTGTAAACCAGAGCTGGTTCTCATGGCCTTCGTCACTTTGGCTTAAGGCTCCCCGAGACGAT	WT	TwoExp	id_uc001dxm.2_5723_WT	id_uc001dxm.2_5723_WT	id_uc001dxm.2_5723
ATGGGGTTCGGTATGCGCTGTGTGATGAGCTGGTGGCAGAGATGGAGCACTACGGCCAGTGGTCAGGCGGCCGGCATGAGGATGGCTCATGAAGGCTCCCCGAGACGAT	WT	TwoExp	id_uc003uyd.3_2216_WT	id_uc003uyd.3_2216_WT	id_uc003uyd.3_2216
ATGGGGTTCGGTATGCGCCGACGTCTTCATCGGCCGCTACTACACTGTGTTTGACCGTGACAACAACAGGGTGGGCTTCGCCGCAATGATGAAGGCTCCCCGAGACGAT	WT	TwoExp	id_uc001luc.2_1324_WT	id_uc001luc.2_1324_WT	id_uc001luc.2_1324
ATGGGGTTCGGTATGCGCTTCAAGAACCTTACTATTATCCTCCAATCAGTTCTACACTGTTGGGGAAAATCCCCTGGACCTTAGTCACCCTAAGGCTCCCCGAGACGAT	WT	PredictedTRUB1	id_uc001itk.2_1957_WT	id_uc001itk.2_1957_WT	id_uc001itk.2_1957
ATGGGGTTCGGTATGCGCGGGCAGTAGAGAGCTTGAAAATCTCATTGGAATCTCCTGTGCATCACATTTCTTAAAAAGAGAAATAGCATTCAAGGCTCCCCGAGACGAT	WT	TwoExp	id_uc001dbb.2_632_WT	id_uc001dbb.2_632_WT	id_uc001dbb.2_632
ATGGGGTTCGGTATGCGCCCGCCGAGAGGCCTATCTCCTGCTCCAGCTGTTCAAGACAGCACTCCAGGAGGAAATCAAGTCAACACCTATTAAGGCTCCCCGAGACGAT	WT	PredictedTRUB1	id_uc001fpf.3_3105_WT	id_uc001fpf.3_3105_WT	id_uc001fpf.3_3105
ATGGGGTTCGGTATGCGCTTAATGGCTGCGGTACCCTAACCGTGTAAAGGTAGCATAATCACTTGTTCCTTAAATAGGGACTTGCGACTGTAAGGCTCCCCGAGACGAT	WT	TwoExp	id_uc002gzb.2_914_WT	id_uc002gzb.2_914_WT	id_uc002gzb.2_914
ATGGGGTTCGGTATGCGCCACGCTGGGCCAGACTACCTCAGAGGAGGCTGTAGGAGGAGCTACACTGGCCCAGACCACCTCGGTGTCTGCAAAGGCTCCCCGAGACGAT	WT	TwoExp	id_uc004dks.1_3048_WT	id_uc004dks.1_3048_WT	id_uc004dks.1_3048
ATGGGGTTCGGTATGCGCACCTCCTAGACCAGGAAGTAGCTTTGCTCATTTTGGGTTTGACGAACAACTTATGCACCAGATTCTGGGAGGTAAGGCTCCCCGAGACGAT	WT	TwoExp	id_uc002jbx.3_1075_WT	id_uc002jbx.3_1075_WT	id_uc002jbx.3_1075
ATGGGGTTCGGTATGCGCTAGATATGTGGGTTAATTTCTGGGCTCTCAGTTCCATTCTGTTGATGTATAGATCTGTCCTTATGTTAATCAGAAGGCTCCCCGAGACGAT	WT	PredictedTRUB1	id_uc021vkc.1_2344_WT	id_uc021vkc.1_2344_WT	id_uc021vkc.1_2344
ATGGGGTTCGGTATGCGCAGGGTGGTGCAGTTGAATCCTTGGCCTGAATATATTTACACACGTCTTGAGATGTATAATATACTGGTCCCCAAAGGCTCCCCGAGACGAT	WT	TwoExp	id_uc010iup.1_576_WT	id_uc010iup.1_576_WT	id_uc010iup.1_576
ATGGGGTTCGGTATGCGCCTTGAACCTCCAGAATTGTCATCTGAACCATTTCTATAACAATGGCATCTTAAATGGGGGTCATCCCTCATACAAGGCTCCCCGAGACGAT	WT	TwoExp	id_uc001vrn.3_699_WT	id_uc001vrn.3_699_WT	id_uc001vrn.3_699
ATGGGGTTCGGTATGCGCGTGAGAGAACCAAGTCTCACAGAGGCCTGGGTTCAAGTCCCACCTCTGCCACTAACTGGCATGTGGCATGGCCAAGGCTCCCCGAGACGAT	WT	TwoExp	id_uc003gfi.4_4479_WT	id_uc003gfj.4_4569_WT	id_uc003gfj.4_4569
ATGGGGTTCGGTATGCGCGTGAGAGAACCAAGTCTCACAGAGGCCTGGGTTCAAGTCCCACCTCTGCCACTAACTGGCATGTGGCATGGCCAAGGCTCCCCGAGACGAT	WT	PredictedTRUB1	id_uc003gfi.4_4479_WT	id_uc003gfj.4_4569_WT	id_uc003gfj.4_4569
ATGGGGTTCGGTATGCGCGTGAGAGAACCAAGTCTCACAGAGGCCTGGGTTCAAGTCCCACCTCTGCCACTAACTGGCATGTGGCTTTCTAAAGGCTCCCCGAGACGAT	WT	TwoExp	id_uc003gfi.4_4479_WT	id_uc003gfi.4_4479_WT	id_uc003gfi.4_4479
ATGGGGTTCGGTATGCGCGTGAGAGAACCAAGTCTCACAGAGGCCTGGGTTCAAGTCCCACCTCTGCCACTAACTGGCATGTGGCTTTCTAAAGGCTCCCCGAGACGAT	WT	PredictedTRUB1	id_uc003gfi.4_4479_WT	id_uc003gfi.4_4479_WT	id_uc003gfi.4_4479
ATGGGGTTCGGTATGCGCAGGAGGAGGACTGAGCCCAGAATTCACTAGGTTCGAATCCAGAGAGCAGTGTGGAAAAAAAAAAAGCACGCATAAGGCTCCCCGAGACGAT	WT	IdentifiedTRUB1	id_uc010sfy.2_1963_WT	id_uc010sfy.2_1963_WT	id_uc010sfy.2_1963
ATGGGGTTCGGTATGCGCAAAGATTTTGCAATGAGCAAAAATAATCGCTTTACAAGTGCTGGCCAAGCATCTAAGAATATAATTAAACCATAAGGCTCCCCGAGACGAT	WT	TwoExp	id_uc021vgc.1_1725_WT	id_uc021vgc.1_1725_WT	id_uc021vgc.1_1725
ATGGGGTTCGGTATGCGCAGAGAAAGTTTCTGCCTGGCCCTGCATCTGGTTCCAGCCCACCTGCCCTCCCCTTTTTCGGGACTAGCACGCGAAGGCTCCCCGAGACGAT	WT	PredictedTRUB1	id_uc002xoo.3_468_WT	id_uc002xoo.3_468_WT	id_uc002xoo.3_468
ATGGGGTTCGGTATGCGCCGGAAGGCTCTCTTCCCGTCACCTAGAACCTCTACAGGTCCCCTCGCCCCTATGATCGTGGTGCCTGGGCCTTAAGGCTCCCCGAGACGAT	WT	TwoExp	id_uc001ybm.4_1941_WT	id_uc001ybm.4_1941_WT	id_uc001ybm.4_1941
ATGGGGTTCGGTATGCGCCGCAGTTTTCATCGAAGACAGTTCATTACGCATTGGCTAGAGATTTACTACATCCGTCCTTGGAACGTATGCCAAGGCTCCCCGAGACGAT	WT	TwoExp	id_uc002alx.3_497_WT	id_uc002alx.3_497_WT	id_uc002alx.3_497
ATGGGGTTCGGTATGCGCGCCCCCCGCCACTCCTCTGGGACCCTGGGCCTTCTGGAGCAGGTCACAGTGGTGCCCTCTCCCCAAAAGCCGGAAGGCTCCCCGAGACGAT	WT	TwoExp	id_uc002plf.1_645_WT	id_uc002plf.1_645_WT	id_uc002plf.1_645
ATGGGGTTCGGTATGCGCGTGATGAATGTGGTAAATGCTTCACGAGAAGTTCAAGCCTTATCCGCCATAAAATAATCCACACTGAGGCATGAAGGCTCCCCGAGACGAT	WT	PredictedTRUB1	id_uc003usk.1_1388_WT	id_uc003usk.1_1388_WT	id_uc003usk.1_1388
ATGGGGTTCGGTATGCGCGCTCAAGAGGGACTGGACGGCTGAGCTGGGCATCCGACACGTACTGCTGACCATCAAGTGCCTGCTGGCTAACAAGGCTCCCCGAGACGAT	WT	TwoExp	id_uc002qkx.1_695_WT	id_uc002qkx.1_695_WT	id_uc002qkx.1_695
ATGGGGTTCGGTATGCGCTTCCTGGCAGCCTCCCTCTGGGGGGCTGCGGTTCGACCCCCCCCACCCCCACCGGGCTGGCTGCCCACCGCCCAAGGCTCCCCGAGACGAT	WT	IdentifiedTRUB1	id_uc002poq.3_3654_WT	id_uc002poq.3_3654_WT	id_uc002poq.3_3654
ATGGGGTTCGGTATGCGCTTCCTGGCAGCCTCCCTCTGGGGGGCTGCGGTTCGACCCCCCCCACCCCCACCGGGCTGGCTGCCCACCGCCCAAGGCTCCCCGAGACGAT	WT	TwoExp	id_uc002poq.3_3654_WT	id_uc002poq.3_3654_WT	id_uc002poq.3_3654
ATGGGGTTCGGTATGCGCTTCCTGGCAGCCTCCCTCTGGGGGGCTGCGGTTCGACCCCCCCCACCCCCACCGGGCTGGCTGCCGAAAGATAAAGGCTCCCCGAGACGAT	WT	IdentifiedTRUB1	id_uc002poq.3_3654_WT	id_uc002poq.3_3654_WT	id_uc002poq.3_3654
ATGGGGTTCGGTATGCGCTTCCTGGCAGCCTCCCTCTGGGGGGCTGCGGTTCGACCCCCCCCACCCCCACCGGGCTGGCTGCCGAAAGATAAAGGCTCCCCGAGACGAT	WT	TwoExp	id_uc002poq.3_3654_WT	id_uc002poq.3_3654_WT	id_uc002poq.3_3654
ATGGGGTTCGGTATGCGCGTTGTTCCACTGATTAAAGATGCCTGCCAGGTTCTACTCCTGAGATTGCCACCAGAATATGAAAACGATACTGAAGGCTCCCCGAGACGAT	WT	TwoExp	id_uc003jvh.3_2249_WT	id_uc003jvh.3_2249_WT	id_uc003jvh.3_2249
ATGGGGTTCGGTATGCGCGTTGTTCCACTGATTAAAGATGCCTGCCAGGTTCTACTCCTGAGATTGCCACCAGAATATGAAAACGATACTGAAGGCTCCCCGAGACGAT	WT	IdentifiedTRUB1	id_uc003jvh.3_2249_WT	id_uc003jvh.3_2249_WT	id_uc003jvh.3_2249
ATGGGGTTCGGTATGCGCGTTGTTCCACTGATTAAAGATGCCTGCCAGGTTCTACTCCTGAGATTGCCACCAGAATATGAAAATTGGTCTAAAGGCTCCCCGAGACGAT	WT	TwoExp	id_uc003jvh.3_2249_WT	id_uc003jvh.3_2249_WT	id_uc003jvh.3_2249
ATGGGGTTCGGTATGCGCGTTGTTCCACTGATTAAAGATGCCTGCCAGGTTCTACTCCTGAGATTGCCACCAGAATATGAAAATTGGTCTAAAGGCTCCCCGAGACGAT	WT	IdentifiedTRUB1	id_uc003jvh.3_2249_WT	id_uc003jvh.3_2249_WT	id_uc003jvh.3_2249
ATGGGGTTCGGTATGCGCAAACTCAAATTCAAAGGTAAAAAGCATGGCTCTGTGAGCGCTGATGAGGCTGCCCGCACGGCTCCTTATTCGCAAGGCTCCCCGAGACGAT	WT	CTGsites	id_uc010ujz.2_428_WT	id_uc010ujz.2_428_WT	id_uc010ujz.2_428
ATGGGGTTCGGTATGCGCAAACTCAAATTCAAAGGTAAAAAGCATGGCTCTGTGAGCGCTGATGAGGCTGCCCGCACGGCTCCGACAGCCTAAGGCTCCCCGAGACGAT	WT	CTGsites	id_uc010ujz.2_428_WT	id_uc010ujz.2_428_WT	id_uc010ujz.2_428
ATGGGGTTCGGTATGCGCAGACAGCAAGCAAAGCCAGCAGGACATGAAGTTGCTATTAAATGGACTTCGTGATTTTTGTTTTGCATCAGCTAAGGCTCCCCGAGACGAT	WT	TwoExp	id_uc001jsm.3_2747_WT	id_uc001jsm.3_2747_WT	id_uc001jsm.3_2747
ATGGGGTTCGGTATGCGCAGAAAGCTCCCTCCTGTGTGTCCCTGGTGGTCTAGTGGCTAGGATTCGGCGCTTTCACCGCCGCGTTTATAGGAAGGCTCCCCGAGACGAT	WT	TwoExp	id_uc021ogr.1_313_WT	id_uc021ogr.1_313_WT	id_uc021ogr.1_313
ATGGGGTTCGGTATGCGCCACGAGGGCCCCGTGGGTGGGCCTGGCCCTGCTTTCTACGCCAATGTTATGCCAGCTCCATGTTCGTTATATGAAGGCTCCCCGAGACGAT	WT	TwoExp	id_uc001vqx.3_5897_WT	id_uc001vqx.3_5897_WT	id_uc001vqx.3_5897
ATGGGGTTCGGTATGCGCCATTTAAAATGGGAGACCCTGGGAAAGCCTGTTCTAGTCAGTCCACCCTATTGTCATTATGAAAGTTCGAACTAAGGCTCCCCGAGACGAT	WT	PredictedTRUB1	id_uc009xfn.1_3487_WT	id_uc009xfn.1_3487_WT	id_uc009xfn.1_3487
ATGGGGTTCGGTATGCGCGGTTTTTCCTCTGTGACTGGGCCGTCTTGGTGTCTCGTGGCACGCGTCACAGTGGTGCTAGTCTGACTTCGGCAAGGCTCCCCGAGACGAT	WT	Pus1	id_uc002lqm.1_1481_WT	id_uc002lqm.1_1481_WT	id_uc002lqm.1_1481
ATGGGGTTCGGTATGCGCTTTCTGGTCAAAATGGCTGGTAAGCAGGCCGTTTCAGCATCAGGCAAGTGGCTGGATGGTATTCGCTAAATATAAGGCTCCCCGAGACGAT	WT	TwoExp	id_uc022ayx.1_126_WT	id_uc022ayx.1_126_WT	id_uc022ayx.1_126
ATGGGGTTCGGTATGCGCGGCTGAGGCACGTGGATCACAAGGTCAGGAGTTCAAGACCAGCCTGGCCAAGATGGTGAAACCCCTCGCTTGCAAGGCTCCCCGAGACGAT	WT	PredictedTRUB1	id_uc001bvr.3_4300_WT	id_uc001bvr.3_4300_WT	id_uc001bvr.3_4300
ATGGGGTTCGGTATGCGCACGGTGCACACATTGCATTTTCTAACTATGTTTTTAAAACCTCTTTGAATGCTGAAAGGTCTTCCTGCGGTATAAGGCTCCCCGAGACGAT	WT	TwoExp	id_uc003lsk.4_6696_WT	id_uc003lsk.4_6696_WT	id_uc003lsk.4_6696
ATGGGGTTCGGTATGCGCAGGCTTTTGAGCATCCCAATGTTGTCCGGATCTGATGCGCCAGTTTCTAAGAGGCCTAGATTTCCAGTAGATTAAGGCTCCCCGAGACGAT	WT	CTGsites	id_uc010ssb.2_516_WT	id_uc010ssb.2_516_WT	id_uc010ssb.2_516
ATGGGGTTCGGTATGCGCAGGCTTTTGAGCATCCCAATGTTGTCCGGATCTGATGCGCCAGTTTCTAAGAGGCCTAGATTTCCGCCCATAAAAGGCTCCCCGAGACGAT	WT	CTGsites	id_uc010ssb.2_516_WT	id_uc010ssb.2_516_WT	id_uc010ssb.2_516
ATGGGGTTCGGTATGCGCCCTTTGATCGTCTTCCTCTTCAGCCATCCAGGTAAGCCAAGATGGGTGCATACAAGTACATCCAGACCGGGATAAGGCTCCCCGAGACGAT	WT	Dkc1	id_uc003ccp.3_116_WT	id_uc003ccp.3_116_WT	id_uc003ccp.3_116
ATGGGGTTCGGTATGCGCCCTTTGATCGTCTTCCTCTTCAGCCATCCAGGTAAGCCAAGATGGGTGCATACAAGTACATCCAGACCGGGATAAGGCTCCCCGAGACGAT	WT	TwoExp	id_uc003ccp.3_116_WT	id_uc003ccp.3_116_WT	id_uc003ccp.3_116
ATGGGGTTCGGTATGCGCCCTTTGATCGTCTTCCTCTTCAGCCATCCAGGTAAGCCAAGATGGGTGCATACAAGTACATCCAGACGCTTGTAAGGCTCCCCGAGACGAT	WT	Dkc1	id_uc003ccp.3_116_WT	id_uc003ccp.3_116_WT	id_uc003ccp.3_116
ATGGGGTTCGGTATGCGCCCTTTGATCGTCTTCCTCTTCAGCCATCCAGGTAAGCCAAGATGGGTGCATACAAGTACATCCAGACGCTTGTAAGGCTCCCCGAGACGAT	WT	TwoExp	id_uc003ccp.3_116_WT	id_uc003ccp.3_116_WT	id_uc003ccp.3_116
ATGGGGTTCGGTATGCGCGGAGCCAGTCAGTCTCCATGGGCTACCAGCCTTACAACATGCAGAATCTCATGACCACCCTCCCATGAATTCAAAGGCTCCCCGAGACGAT	WT	TwoExp	id_uc002kbg.3_2261_WT	id_uc002kbg.3_2261_WT	id_uc002kbg.3_2261
ATGGGGTTCGGTATGCGCGTTGGTGGCGCTGTGCCCACGAGGCAGGGGCTTTTGTATTTCCTGCCTCTGCCCCACCCCCAAAGCCACAATGAAGGCTCCCCGAGACGAT	WT	Pus1	id_uc002jbc.3_1281_WT	id_uc002jbc.3_1281_WT	id_uc002jbc.3_1281
ATGGGGTTCGGTATGCGCTGGCCGAGGCCCTGGACGAACGGCTGGGTGACTTTGCCTTCCCTGACGAGTTCGTCTTTGACGTCGGGCTACTAAGGCTCCCCGAGACGAT	WT	Dkc1	id_uc002myt.3_1202_WT	id_uc002myt.3_1202_WT	id_uc002myt.3_1202
ATGGGGTTCGGTATGCGCAGGGCATGGATGAGACGAGAGTTCAACAAGGCTGAGAGCAACATGAACGACCTCGTCTCTGAGTAATGTTCATAAGGCTCCCCGAGACGAT	WT	TwoExp	id_uc001cuq.2_3785_WT	id_uc001cuq.2_3785_WT	id_uc001cuq.2_3785
ATGGGGTTCGGTATGCGCATAGCCAAGTGTAATCATCAGTAACCCTGTGTTCTATCCACAGGTAAAAAACAATCATCCTCTTCCCCCCCAAAAGGCTCCCCGAGACGAT	WT	PredictedTRUB1	id_uc003tbe.2_1042_WT	id_uc003tbe.2_1042_WT	id_uc003tbe.2_1042
ATGGGGTTCGGTATGCGCATAGCCAAGTGTAATCATCAGTAACCCTGTGTTCTATCCACAGTTAAAAGAATATTGGCAGAGAACGAGGGATAAGGCTCCCCGAGACGAT	WT	PredictedTRUB1	id_uc003tbd.3_800_WT	id_uc003tbd.3_800_WT	id_uc003tbd.3_800
ATGGGGTTCGGTATGCGCTGGGCCAATAAGGATTCCACTTCTTTCAGATTTGACCCATCAGATCTCAAAGGACTATGGTGTATCTTCCACGAAGGCTCCCCGAGACGAT	WT	Dkc1	id_uc004dam.3_583_WT	id_uc004dam.3_583_WT	id_uc004dam.3_583
ATGGGGTTCGGTATGCGCTGGGCCAATAAGGATTCCACTTCTTTCAGATTTGACCCATCAGATCTCAAAGGACTATGGTGTATCTTCCACGAAGGCTCCCCGAGACGAT	WT	Dkc1	id_uc004dam.3_583_WT	id_uc004dam.3_583_WT	id_uc004dam.3_583
ATGGGGTTCGGTATGCGCTGGGCCAATAAGGATTCCACTTCTTTCAGATTTGACCCATCAGATCTCAAAGGACTATGGTGTATCTTCCACGAAGGCTCCCCGAGACGAT	WT	TwoExp	id_uc004dam.3_583_WT	id_uc004dam.3_583_WT	id_uc004dam.3_583
ATGGGGTTCGGTATGCGCTGGGCCAATAAGGATTCCACTTCTTTCAGATTTGACCCATCAGATCTCAAAGGACTATGGTGTATGCATTCACAAGGCTCCCCGAGACGAT	WT	Dkc1	id_uc004dam.3_583_WT	id_uc004dam.3_583_WT	id_uc004dam.3_583
ATGGGGTTCGGTATGCGCTGGGCCAATAAGGATTCCACTTCTTTCAGATTTGACCCATCAGATCTCAAAGGACTATGGTGTATGCATTCACAAGGCTCCCCGAGACGAT	WT	Dkc1	id_uc004dam.3_583_WT	id_uc004dam.3_583_WT	id_uc004dam.3_583
ATGGGGTTCGGTATGCGCTGGGCCAATAAGGATTCCACTTCTTTCAGATTTGACCCATCAGATCTCAAAGGACTATGGTGTATGCATTCACAAGGCTCCCCGAGACGAT	WT	TwoExp	id_uc004dam.3_583_WT	id_uc004dam.3_583_WT	id_uc004dam.3_583
ATGGGGTTCGGTATGCGCTGGGCCAATAAGGATTCCACTTCTTTCAGATTTGACCCATCAGATCTCAAAGGACTATGGTGTATCTTTAAAAAAGGCTCCCCGAGACGAT	WT	Dkc1	id_uc004dam.3_583_WT	id_uc004dam.3_583_WT	id_uc004dam.3_583
ATGGGGTTCGGTATGCGCTGGGCCAATAAGGATTCCACTTCTTTCAGATTTGACCCATCAGATCTCAAAGGACTATGGTGTATCTTTAAAAAAGGCTCCCCGAGACGAT	WT	Dkc1	id_uc004dam.3_583_WT	id_uc004dam.3_583_WT	id_uc004dam.3_583
ATGGGGTTCGGTATGCGCTGGGCCAATAAGGATTCCACTTCTTTCAGATTTGACCCATCAGATCTCAAAGGACTATGGTGTATCTTTAAAAAAGGCTCCCCGAGACGAT	WT	TwoExp	id_uc004dam.3_583_WT	id_uc004dam.3_583_WT	id_uc004dam.3_583
ATGGGGTTCGGTATGCGCCAACACAGAAGAGTCTAGAAGTAGGCCAGGGTTCCAATCCTGGCTCTGCCACTTCCCAGGTGCCCGAATTGGGAAGGCTCCCCGAGACGAT	WT	PredictedTRUB1	id_uc010hmb.1_1308_WT	id_uc010hmb.1_1308_WT	id_uc010hmb.1_1308
ATGGGGTTCGGTATGCGCTTTTCTGCTCGACTCGCCCCTGATTTTCAAGTTCAAGACTTAACTCAGGGTTCAGGTCTTCCAGGAAATTCATAAGGCTCCCCGAGACGAT	WT	TwoExp	id_uc003ocd.3_3493_WT	id_uc003ocd.3_3493_WT	id_uc003ocd.3_3493
ATGGGGTTCGGTATGCGCGAGCCCAAGAGGAGATCAGCGCAATTGTCAGCTAAACCTCCTGCAAAAGTGGAAGCGAAGCCGAAATCTTAGAAAGGCTCCCCGAGACGAT	WT	TwoExp	id_uc002idg.3_1292_WT	id_uc002idg.3_1292_WT	id_uc002idg.3_1292
ATGGGGTTCGGTATGCGCCCCTCTGGGGCGTCCCCAGCCTCCCCGTCCTCTGTCTAACCTCACCCTCTAAACGTTCAGCGGTGTCGAGCTTAAGGCTCCCCGAGACGAT	WT	TwoExp	id_uc010drs.3_1276_WT	id_uc010drs.3_1276_WT	id_uc010drs.3_1276
ATGGGGTTCGGTATGCGCGTCGAGGAGCTTCAGTACATGGGTGATGAGTCTTCTGCCAACAGCTCCTCTGACCCCGAGAGCAAGCGAATCGAAGGCTCCCCGAGACGAT	WT	Pus1	id_uc002ass.3_1074_WT	id_uc002ass.3_1074_WT	id_uc002ass.3_1074
ATGGGGTTCGGTATGCGCGAACAGGGGTGGATTCCCCAACCTCAACCTCCTTTCTTCTCTGCTCCCAAACCATGTCAGGACCATCAGTATTAAGGCTCCCCGAGACGAT	WT	TwoExp	id_uc002kcr.1_1462_WT	id_uc002kcr.1_1462_WT	id_uc002kcr.1_1462
ATGGGGTTCGGTATGCGCTGGAGCAGAAGGCAGCAGCAATGCAGAGTCCCTGGACAGGCTCCTGCCACCTGTGGGCACTGGGCCTAGTTAGAAGGCTCCCCGAGACGAT	WT	CTGsites	id_uc011abm.2_435_WT	id_uc011abm.2_435_WT	id_uc011abm.2_435
ATGGGGTTCGGTATGCGCTGGAGCAGAAGGCAGCAGCAATGCAGAGTCCCTGGACAGGCTCCTGCCACCTGTGGGCACTGGGCGTATTTAGAAGGCTCCCCGAGACGAT	WT	CTGsites	id_uc011abm.2_435_WT	id_uc011abm.2_435_WT	id_uc011abm.2_435
ATGGGGTTCGGTATGCGCGTAGAGCTAAGCAGCCCTTAGAGGAAAACAGTTCAACTCTGACTTTCCTAGTTGTTTTTTTATTGATACACGTAAGGCTCCCCGAGACGAT	WT	IdentifiedTRUB1	id_uc001jrb.3_942_WT	id_uc001jrb.3_942_WT	id_uc001jrb.3_942
ATGGGGTTCGGTATGCGCGTAGAGCTAAGCAGCCCTTAGAGGAAAACAGTTCAACTCTGACTTTCCTAGTTGTTTTTTTATTGATACACGTAAGGCTCCCCGAGACGAT	WT	TwoExp	id_uc001jrb.3_942_WT	id_uc001jrb.3_942_WT	id_uc001jrb.3_942
ATGGGGTTCGGTATGCGCGTAGAGCTAAGCAGCCCTTAGAGGAAAACAGTTCAACTCTGACTTTCCTAGTTGTTTTTTTATTGTATGCGCCAAGGCTCCCCGAGACGAT	WT	IdentifiedTRUB1	id_uc001jrb.3_942_WT	id_uc001jrb.3_942_WT	id_uc001jrb.3_942
ATGGGGTTCGGTATGCGCGTAGAGCTAAGCAGCCCTTAGAGGAAAACAGTTCAACTCTGACTTTCCTAGTTGTTTTTTTATTGTATGCGCCAAGGCTCCCCGAGACGAT	WT	TwoExp	id_uc001jrb.3_942_WT	id_uc001jrb.3_942_WT	id_uc001jrb.3_942
ATGGGGTTCGGTATGCGCAGAGATCAAAGCTTTGGATCTGAAAGAGTGGTTCCAGCCCAGCAGCATGAACATGGCCTGGGAATTTTACAATAAGGCTCCCCGAGACGAT	WT	PredictedTRUB1	id_uc003owl.1_751_WT	id_uc003owl.1_751_WT	id_uc003owl.1_751
ATGGGGTTCGGTATGCGCGAGGCCAGCAGAACAAACATAGATGAGTCAGCTATGCCTCCACCACCACCTCAGGGAGTTAAGCGTGGTCCACAAGGCTCCCCGAGACGAT	WT	TwoExp	id_uc003yod.3_1690_WT	id_uc003yod.3_1690_WT	id_uc003yod.3_1690
ATGGGGTTCGGTATGCGCTAATGACGTGCTGGTGGAGGAGAGGATCATTGTGAAGCAGCTGGAGGAAGACCTGTATGACGGCCTCTCCAGCAAGGCTCCCCGAGACGAT	WT	Pus1	id_uc003ben.3_387_WT	id_uc003ben.3_387_WT	id_uc003ben.3_387
ATGGGGTTCGGTATGCGCCCTCTGCAGGCCTAGGGTCCAAAACTCAGGGTTCCATCCCCCTTGCCTTCCCGTCTTGCAAGAGGGATTCCGAAAGGCTCCCCGAGACGAT	WT	PredictedTRUB1	id_uc002jvt.1_1334_WT	id_uc002jvt.1_1334_WT	id_uc002jvt.1_1334
ATGGGGTTCGGTATGCGCACCTCTGTGATCTGCTTCCTTCCTTTCCAGATTATGCGGATCAAACCTCACCAAGGCCAGCACATTCTGTATTAAGGCTCCCCGAGACGAT	WT	TwoExp	id_uc003owk.3_741_WT	id_uc003owk.3_741_WT	id_uc003owk.3_741
ATGGGGTTCGGTATGCGCCCCCCTTCAGCTGGCAGCCAAGGAGGCGAAGCTTCGAGACCTGGAGGACTCACTGGCCCGTGAGCCTTAACAAAAGGCTCCCCGAGACGAT	WT	TwoExp	id_uc010pha.1_192_WT	id_uc010pha.1_192_WT	id_uc010pha.1_192
ATGGGGTTCGGTATGCGCGCAAGGAAGGGCCAGGGCATCCCCCTGCAGGTTCTAGTCCTGGCTGCCTGTGCTCATAGGAGGCATCCATGCCAAGGCTCCCCGAGACGAT	WT	PredictedTRUB1	id_uc003ehp.1_1450_WT	id_uc003ehp.1_1450_WT	id_uc003ehp.1_1450
ATGGGGTTCGGTATGCGCGGCGGCCGCCACCGCAGGCGACAGGGGTGTCTTTTATGAATAATCAAAAGCAGCAAAAGCCAACGTTGAGTAGAAGGCTCCCCGAGACGAT	WT	TwoExp	id_uc010zhg.2_170_WT	id_uc010zhg.2_170_WT	id_uc010zhg.2_170
ATGGGGTTCGGTATGCGCGATCAACTTCGACAAATACCACCCAGGCTACTTTGGGAAAGTTGGTATGAAGCATTACCACTTAAGCTTGGCTAAGGCTCCCCGAGACGAT	WT	TwoExp	id_uc001mgs.4_525_WT	id_uc001mgs.4_525_WT	id_uc001mgs.4_525
ATGGGGTTCGGTATGCGCGCCGCTGCTTCTTTCCCGAGCTTGGAACTTCGTTATCCGCGATGCGTTTCCTGGCAGCTACATTCTCTGATGCAAGGCTCCCCGAGACGAT	WT	TwoExp	id_uc001xpy.3_100_WT	id_uc001xpy.3_100_WT	id_uc001xpy.3_100
ATGGGGTTCGGTATGCGCTGAGCCCCAGGCACCGAGGAGGGTGCTGGCTGTAGGTGAATGGTAGTGGAGCCAGGCTTCCACTGTTCGACGTAAGGCTCCCCGAGACGAT	WT	TwoExp	id_uc002aun.4_1828_WT	id_uc002aun.4_1828_WT	id_uc002aun.4_1828
ATGGGGTTCGGTATGCGCGGAGGGTCTCAGCTCTGCTGCCCCCACCCCAGTACTAGCCTAGCTTCCCAAGCTGTGGCTTAGAGTGGACTACAAGGCTCCCCGAGACGAT	WT	TwoExp	id_uc001foc.4_4399_WT	id_uc001foc.4_4399_WT	id_uc001foc.4_4399
ATGGGGTTCGGTATGCGCGGAGTCATGGACCCAGCTATGGTTCTTCCGATTTGTGGTGAATGCTGCTGGCTATGCCAGCTTTAACATTCTTAAGGCTCCCCGAGACGAT	WT	TwoExp	id_uc003oxd.3_253_WT	id_uc003oxd.3_253_WT	id_uc003oxd.3_253
ATGGGGTTCGGTATGCGCCGGCCTCGGCGGCGGCGCGGCGAGCGCGGGCCTGTGGAGCGGCGGCCGGGCGCGCGGCCCCGGCGAAGTATTAAAGGCTCCCCGAGACGAT	WT	CTGsites	id_uc001hpc.1_93_WT	id_uc001hpc.1_93_WT	id_uc001hpc.1_93
ATGGGGTTCGGTATGCGCCGGCCTCGGCGGCGGCGCGGCGAGCGCGGGCCTGTGGAGCGGCGGCCGGGCGCGCGGCCCCGGCGTTTGGCTAAAGGCTCCCCGAGACGAT	WT	CTGsites	id_uc001hpc.1_93_WT	id_uc001hpc.1_93_WT	id_uc001hpc.1_93
ATGGGGTTCGGTATGCGCGGACGCTGCCATCATGTTGAAGCCTCAGCCGCTACAACAGCCCTCCCAGCCCCAGCAGCCGCCCCATCCTCTAAAGGCTCCCCGAGACGAT	WT	TwoExp	id_uc002dqy.3_188_WT	id_uc002dqy.3_188_WT	id_uc002dqy.3_188
ATGGGGTTCGGTATGCGCCTAGAAATCCATTGGGGTCTCCCCGCGCAGGTTCGAATCCTGCCGACTACGTCATATTTTTTTCTGGGAGAACAAGGCTCCCCGAGACGAT	WT	PredictedTRUB1	id_uc002gkq.4_5266_WT	id_uc002gkq.4_5266_WT	id_uc002gkq.4_5266
ATGGGGTTCGGTATGCGCGTGAGAAGACACGGGCACAGCCTGTCAGAGGTTCCACTCCTGAAAAGCTCTGAGGATGAAATTCTCGGATCCTAAGGCTCCCCGAGACGAT	WT	PredictedTRUB1	id_uc001als.2_3526_WT	id_uc001als.2_3526_WT	id_uc001als.2_3526
ATGGGGTTCGGTATGCGCGAATTTGGCTGAGGAGCAGCTTTAGGTATGGATTGATGACTAAGTCAAGCTACTTCCTGAGCTTCAGCCGTGGAAGGCTCCCCGAGACGAT	WT	TwoExp	id_uc002haz.3_2001_WT	id_uc002haz.3_2001_WT	id_uc002haz.3_2001
ATGGGGTTCGGTATGCGCCCAGCAGAACCCAGGCCCCTAGAGTCCTGCTGTAGGAGTGAGCCTGAGATACCGGAGTCCTCTCGTGATTTAAAAGGCTCCCCGAGACGAT	WT	TwoExp	id_uc001rtx.4_1848_WT	id_uc001rtx.4_1848_WT	id_uc001rtx.4_1848
ATGGGGTTCGGTATGCGCGCTGGACATTCCCATCGAGATGACACCTGGGTTCCAATCCCAGCTCTGCCTTTGAAGCACTTGTGGCGCTTTTAAGGCTCCCCGAGACGAT	WT	TwoExp	id_uc001cjk.2_10673_WT	id_uc001cjk.2_10673_WT	id_uc001cjk.2_10673
ATGGGGTTCGGTATGCGCGCTGGACATTCCCATCGAGATGACACCTGGGTTCCAATCCCAGCTCTGCCTTTGAAGCACTTGTGGCGCTTTTAAGGCTCCCCGAGACGAT	WT	PredictedTRUB1	id_uc001cjk.2_10673_WT	id_uc001cjk.2_10673_WT	id_uc001cjk.2_10673
ATGGGGTTCGGTATGCGCGCTGGACATTCCCATCGAGATGACACCTGGGTTCCAATCCCAGCTCTGCCTTTGAAGCACTTGTGGCATACTAAAGGCTCCCCGAGACGAT	WT	TwoExp	id_uc001cjk.2_10673_WT	id_uc001cjk.2_10673_WT	id_uc001cjk.2_10673
ATGGGGTTCGGTATGCGCGCTGGACATTCCCATCGAGATGACACCTGGGTTCCAATCCCAGCTCTGCCTTTGAAGCACTTGTGGCATACTAAAGGCTCCCCGAGACGAT	WT	PredictedTRUB1	id_uc001cjk.2_10673_WT	id_uc001cjk.2_10673_WT	id_uc001cjk.2_10673
ATGGGGTTCGGTATGCGCCGCTGCTGGAGGCCGGCCTGGCGCGGGTGCTCTTCTACCCGACGCTGCTCTACACCCTGTTCCGCACTCCACTAAGGCTCCCCGAGACGAT	WT	TwoExp	id_uc001nfs.4_240_WT	id_uc001nfs.4_240_WT	id_uc001nfs.4_240
ATGGGGTTCGGTATGCGCGCGATGGACGAGAGGAGATTTCAAGATGCGGTTCGACTCCGAGGGAGGAGCTTTGCGGGCAACCTGCGGTAGCAAGGCTCCCCGAGACGAT	WT	TwoExp	id_uc001igp.3_1217_WT	id_uc001igp.3_1217_WT	id_uc001igp.3_1217
ATGGGGTTCGGTATGCGCGCGATGGACGAGAGGAGATTTCAAGATGCGGTTCGACTCCGAGGGAGGAGCTTTGCGGGCAACCTGCGGTAGCAAGGCTCCCCGAGACGAT	WT	IdentifiedTRUB1	id_uc001igp.3_1217_WT	id_uc001igp.3_1217_WT	id_uc001igp.3_1217
ATGGGGTTCGGTATGCGCGCGATGGACGAGAGGAGATTTCAAGATGCGGTTCGACTCCGAGGGAGGAGCTTTGCGGGCAACCTTAATCCAGAAGGCTCCCCGAGACGAT	WT	TwoExp	id_uc001igp.3_1217_WT	id_uc001igp.3_1217_WT	id_uc001igp.3_1217
ATGGGGTTCGGTATGCGCGCGATGGACGAGAGGAGATTTCAAGATGCGGTTCGACTCCGAGGGAGGAGCTTTGCGGGCAACCTTAATCCAGAAGGCTCCCCGAGACGAT	WT	IdentifiedTRUB1	id_uc001igp.3_1217_WT	id_uc001igp.3_1217_WT	id_uc001igp.3_1217
ATGGGGTTCGGTATGCGCTCGGCCGCGCGGACTGAAGGAGACTGAAGCACTTCTACCCTAGCCGGGCCCAGCCCCCGAGCAGTAACCATCCAAGGCTCCCCGAGACGAT	WT	TwoExp	id_uc003fnq.3_185_WT	id_uc003fnq.3_185_WT	id_uc003fnq.3_185
ATGGGGTTCGGTATGCGCAAACATCCTGGACCACGACCTCATTATCTGGTTTGGAGACATGAACTTTCGGATCGAGGACTTTGCTTCCTCAAAGGCTCCCCGAGACGAT	WT	Pus1	id_uc002fsr.3_959_WT	id_uc002fsr.3_959_WT	id_uc002fsr.3_959
ATGGGGTTCGGTATGCGCCAGCCGAGGGCTGCTCTCCCAGAGCCTGGAGTTCAACTCTCCTGCCGACAACTACACAGTGTGTGCATCCTCAAAGGCTCCCCGAGACGAT	WT	PredictedTRUB1	id_uc002pwc.2_105_WT	id_uc002pwc.2_105_WT	id_uc002pwc.2_105
ATGGGGTTCGGTATGCGCCCGTCATCTTCGGGAGCCGTGGAGCTCTCGGATACAGCCGACACCATGGGTTTCGGAGACCTGAAGAGCGAATAAGGCTCCCCGAGACGAT	WT	TwoExp	id_uc002vbg.1_101_WT	id_uc002vbg.1_101_WT	id_uc002vbg.1_101
ATGGGGTTCGGTATGCGCGTACCTGGTTGAGTGGGGAGGAGGGGGCATCTTCTGAACAGCCTGCCTCTGCCCAGCTCCCCATTCTTATCTTAAGGCTCCCCGAGACGAT	WT	TwoExp	id_uc003oeh.3_1937_WT	id_uc003oeh.3_1937_WT	id_uc003oeh.3_1937
ATGGGGTTCGGTATGCGCGAGTGGCAAACGCATCCTCTTGCCGTTCCCGGTGTTTGGGCCTTGCCTGTGACGGTGGGAAAAGAGGCCCGGTAAGGCTCCCCGAGACGAT	WT	Pus1	id_uc001pdg.2_377_WT	id_uc001pdg.2_377_WT	id_uc001pdg.2_377
ATGGGGTTCGGTATGCGCGCTCCGCCGCCGAGCGCCTGTGCCGGCACGGCTACACCATGGAGCGCCCGGATAAGGCGGCGCTGTGTTAACTAAGGCTCCCCGAGACGAT	WT	TwoExp	id_uc004feu.3_120_WT	id_uc004feu.3_120_WT	id_uc004feu.3_120
ATGGGGTTCGGTATGCGCTCGCCGCCGCCGCGGCCGCCACCTGGAGTTTCTTCAGACTCCAGATTTCCCTGTCAACCACGAGGCAACCCGTAAGGCTCCCCGAGACGAT	WT	TwoExp	id_uc001dpn.3_342_WT	id_uc001dpn.3_342_WT	id_uc001dpn.3_342
ATGGGGTTCGGTATGCGCGGGCCCCTGGGGTGGGCACTGAGGGGGCGGGTTCCATCCCCCCAGGACTTCTCCTACGATGAGTCGTAGGGTTAAGGCTCCCCGAGACGAT	WT	PredictedTRUB1	id_uc001ady.2_265_WT	id_uc001ady.2_265_WT	id_uc001ady.2_265
ATGGGGTTCGGTATGCGCGAGATGCTGTTCGAAGAGTCATGTTTGCTCGATATAAAGAACTCGATTAAGAAAGGAGACAAGTTAAAGCTCTAAGGCTCCCCGAGACGAT	WT	TwoExp	id_uc003cyc.3_3604_WT	id_uc003cyc.3_3604_WT	id_uc003cyc.3_3604
ATGGGGTTCGGTATGCGCTCCTGCCACCCACCTTTGCCCACCCACAGGCCTGCCTGCTGCTCCAGAAGACCCTGTCCATGCGGACCAACGGAAGGCTCCCCGAGACGAT	WT	CTGsites	id_uc002fya.4_537_WT	id_uc002fya.4_537_WT	id_uc002fya.4_537
ATGGGGTTCGGTATGCGCTCCTGCCACCCACCTTTGCCCACCCACAGGCCTGCCTGCTGCTCCAGAAGACCCTGTCCATGCGGAGAGATACAAGGCTCCCCGAGACGAT	WT	CTGsites	id_uc002fya.4_537_WT	id_uc002fya.4_537_WT	id_uc002fya.4_537
ATGGGGTTCGGTATGCGCGCCAAGTCCTCACCCCCACACCTAATGGAGGTTCCATTCCCCCGTAGCTGGTCACGCCTGCCAGTGCACGGGCAAGGCTCCCCGAGACGAT	WT	PredictedTRUB1	id_uc003ufz.1_1546_WT	id_uc003ufz.1_1546_WT	id_uc003ufz.1_1546
ATGGGGTTCGGTATGCGCGCAGACACCCTCAGCAGACAGGAGGCCTGAGTTCCAGTCTCCACCTTTATTGTTCTTGAAAGCCCAAAGCTTGAAGGCTCCCCGAGACGAT	WT	PredictedTRUB1	id_uc002ayu.1_2200_WT	id_uc002ayu.1_2200_WT	id_uc002ayu.1_2200
ATGGGGTTCGGTATGCGCGCCCAGGTGTTCAAGGCTGCTGTGAGCTGTGTTCGAGCCACTACACTCCAGCCTGGGGACGGAGCACTGTTATAAGGCTCCCCGAGACGAT	WT	IdentifiedTRUB1	id_uc001jsd.3_2960_WT	id_uc001jsd.3_2960_WT	id_uc001jsd.3_2960
ATGGGGTTCGGTATGCGCCGGCGGCGGCGGCGGCAGCAGCGCGGCCCCTTTAAACGCCTGCGGCGCCCCCCGCCCCCGCCATCACGCATTTAAGGCTCCCCGAGACGAT	WT	Pus1	id_uc001yqx.3_81_WT	id_uc001yqx.3_81_WT	id_uc001yqx.3_81
ATGGGGTTCGGTATGCGCGAGCCAGCAGAGGCGCTGAGCCGGGCCGCGCCTGGGCGAACGGCCGGAGCGGGCTGGGCTGGGCCTGTTAATAAAGGCTCCCCGAGACGAT	WT	CTGsites	id_uc003czx.3_1338_WT	id_uc003czx.3_1338_WT	id_uc003czx.3_1338
ATGGGGTTCGGTATGCGCGAGCCAGCAGAGGCGCTGAGCCGGGCCGCGCCTGGGCGAACGGCCGGAGCGGGCTGGGCTGGGCCTAATTTATAAGGCTCCCCGAGACGAT	WT	CTGsites	id_uc003czx.3_1338_WT	id_uc003czx.3_1338_WT	id_uc003czx.3_1338
ATGGGGTTCGGTATGCGCGCGGCTCAACCCTTCAGTGCCCCGCAGGCGGCTGTGCGTGGCGAGCAGTGGACGCCCATCGAGCCGCTCGGCAAAGGCTCCCCGAGACGAT	WT	CTGsites	id_uc002flc.1_2117_WT	id_uc002flc.1_2117_WT	id_uc002flc.1_2117
ATGGGGTTCGGTATGCGCGCGGCTCAACCCTTCAGTGCCCCGCAGGCGGCTGTGCGTGGCGAGCAGTGGACGCCCATCGAGCCTCCGGATGAAGGCTCCCCGAGACGAT	WT	CTGsites	id_uc002flc.1_2117_WT	id_uc002flc.1_2117_WT	id_uc002flc.1_2117
ATGGGGTTCGGTATGCGCGGACTGGGCAGCACCATGCTCAAGCCTAGGGTTCGATCCCCGCCTCCGGAAGCCTCAGTATCCATATGAATCTAAGGCTCCCCGAGACGAT	WT	PredictedTRUB1	id_uc002nif.4_4632_WT	id_uc002nif.4_4632_WT	id_uc002nif.4_4632
ATGGGGTTCGGTATGCGCAGCCCTGGCTCCCATGCCCGTGCCTAGTGGCATGCTGCCCCCCAGCCACCCGGACCCTGCCTTCTCCTTCCTGAAGGCTCCCCGAGACGAT	WT	Pus1	id_uc003crh.1_1956_WT	id_uc003crh.1_1956_WT	id_uc003crh.1_1956
ATGGGGTTCGGTATGCGCGGGAGTCTGCTCAGGACAGTGGTGGAGCTGGGTCTTGAACCCCAGTCTGCACCTAAAAAACTAAACTGCCTTTAAGGCTCCCCGAGACGAT	WT	TwoExp	id_uc003aah.2_2359_WT	id_uc003aah.2_2359_WT	id_uc003aah.2_2359
ATGGGGTTCGGTATGCGCCACCCCTGGTGGATGGCGAGGATGAGAGCTCCTCTGGTGCAAGTGTGGTAGCTATTGACAACAAACATCACCTAAGGCTCCCCGAGACGAT	WT	TwoExp	id_uc001uzn.4_3409_WT	id_uc001uzn.4_3409_WT	id_uc001uzn.4_3409
ATGGGGTTCGGTATGCGCACTTTGAAATGTGTTTCTGTATAAAGCCTGTATTCTCAAACACAGTTACACTTGTGCACCCTCTATGGTTCCGAAGGCTCCCCGAGACGAT	WT	TwoExp	id_uc001jwd.3_3710_WT	id_uc001jwd.3_3710_WT	id_uc001jwd.3_3710
ATGGGGTTCGGTATGCGCGGAATGCCTGAACCAACTGTTTTGAGCCTACTTTGGGGATAAAGGATTATTTGGTCTTCTGGATTTGTTTTGGAAGGCTCCCCGAGACGAT	WT	TwoExp	id_uc003svk.3_183_WT	id_uc003svk.3_183_WT	id_uc003svk.3_183
ATGGGGTTCGGTATGCGCGAGCCTCAGCCTGGCCCAGCTCTCAGCCACCATTTTTCGAAAGGAAGGCTTGGAGGCCTGGCCACGCGAGCTGAAGGCTCCCCGAGACGAT	WT	Pus1	id_uc001wmv.1_1342_WT	id_uc001wmv.1_1342_WT	id_uc001wmv.1_1342
ATGGGGTTCGGTATGCGCCTCGACCCTCGGATAGTTGTAAAGAAGAAAGTTCTACCCTTTCTGTCAAAATGAAGTGTGATTTTATCTTTGCAAGGCTCCCCGAGACGAT	WT	TwoExp	id_uc003qpg.3_231_WT	id_uc003qpg.3_231_WT	id_uc003qpg.3_231
ATGGGGTTCGGTATGCGCCTCGACCCTCGGATAGTTGTAAAGAAGAAAGTTCTACCCTTTCTGTCAAAATGAAGTGTGATTTTATCTTTGCAAGGCTCCCCGAGACGAT	WT	IdentifiedTRUB1	id_uc003qpg.3_231_WT	id_uc003qpg.3_231_WT	id_uc003qpg.3_231
ATGGGGTTCGGTATGCGCCTCGACCCTCGGATAGTTGTAAAGAAGAAAGTTCTACCCTTTCTGTCAAAATGAAGTGTGATTTTCGGTAAACAAGGCTCCCCGAGACGAT	WT	TwoExp	id_uc003qpg.3_231_WT	id_uc003qpg.3_231_WT	id_uc003qpg.3_231
ATGGGGTTCGGTATGCGCCTCGACCCTCGGATAGTTGTAAAGAAGAAAGTTCTACCCTTTCTGTCAAAATGAAGTGTGATTTTCGGTAAACAAGGCTCCCCGAGACGAT	WT	IdentifiedTRUB1	id_uc003qpg.3_231_WT	id_uc003qpg.3_231_WT	id_uc003qpg.3_231
ATGGGGTTCGGTATGCGCGGAGGGGGTGGGGGAGGAGGGAAAGCGGCGAGTAAGATGGAAGATGAGGAGGTCGCTGAGAGCTGACTAGCGAAAGGCTCCCCGAGACGAT	WT	TwoExp	id_uc001aym.4_168_WT	id_uc001aym.4_168_WT	id_uc001aym.4_168
ATGGGGTTCGGTATGCGCTTTGCCTATCTGGGGCGCCTGGCTCACGAGGTTGGCTGGAAGTACCAGGCAGTGACAGCCACCCTGGATGCGTAAGGCTCCCCGAGACGAT	WT	TwoExp	id_uc010sho.2_458_WT	id_uc010sho.2_458_WT	id_uc010sho.2_458
ATGGGGTTCGGTATGCGCGGAGCAGCTGTCCAGGTTTCGTCACCCAAACATTGTGGACTTTGCTGGCTACTGTGCTCAGAACGTCCGATATAAGGCTCCCCGAGACGAT	WT	TwoExp	id_uc004fjs.1_892_WT	id_uc004fjs.1_892_WT	id_uc004fjs.1_892
ATGGGGTTCGGTATGCGCGCGGTTAATTTGGAGTGGCCCCTGGAGTCAGTTTCCTACACCATCCGAGGCCCCACCCAGCACGAATACCGCCAAGGCTCCCCGAGACGAT	WT	TwoExp	id_uc003zba.3_716_WT	id_uc003zba.3_716_WT	id_uc003zba.3_716
ATGGGGTTCGGTATGCGCGACCTTCGTGCAGGAGGACATCTATGATGAGTTTGTGGAGCGGAGCGTTGCCCGGGCCAAGTCTCTCTTGTCAAAGGCTCCCCGAGACGAT	WT	Pus1	id_uc001tst.3_1101_WT	id_uc001tst.3_1101_WT	id_uc001tst.3_1101
ATGGGGTTCGGTATGCGCGCAGGCAGTGAAAAGAGCCAGGAGTCCTGGGTTCTAGTCCCTGCTCTGCCCCCAACTGGCTGTATCCCGTTAAAAGGCTCCCCGAGACGAT	WT	IdentifiedTRUB1	id_uc003fri.3_3734_WT	id_uc003fri.3_3734_WT	id_uc003fri.3_3734
ATGGGGTTCGGTATGCGCTTAACAAGGACACCAAGGTACCCAAGGCCTGCTTATTCACCATCAACAAAGAAGACCACACACTGTGTCTCTAAAGGCTCCCCGAGACGAT	WT	TwoExp	id_uc003vah.3_220_WT	id_uc003vah.3_220_WT	id_uc003vah.3_220
ATGGGGTTCGGTATGCGCGCCCACACTCGCTTCTCCCCAAGCTCCCAGGTTCCATCCCTAGGCCCATCATACCCCTGGCATTGCAGCCTCGAAGGCTCCCCGAGACGAT	WT	PredictedTRUB1	id_uc002czb.3_981_WT	id_uc002czb.3_981_WT	id_uc002czb.3_981
ATGGGGTTCGGTATGCGCTTGGACAAAGTATTAACTCAGATGGGATCCCCTTCAGTGCGTTGCTCAAGCATGTCATAAAGCTTCGCTATAGAAGGCTCCCCGAGACGAT	WT	TwoExp	id_uc002lcz.3_1776_WT	id_uc002lcz.3_1776_WT	id_uc002lcz.3_1776
ATGGGGTTCGGTATGCGCGTGCTGGGAAGGTACACAACTTCATGCTGGGCTTGAATCTCAATACATCTTATCCACTGTCTCCTTCAGAAGCAAGGCTCCCCGAGACGAT	WT	Pus1	id_uc001gsc.3_1692_WT	id_uc001gsc.3_1692_WT	id_uc001gsc.3_1692
ATGGGGTTCGGTATGCGCCTCCTCCTCTGCGTCCTCGGCCGCGGCCCGGGTCCCTCGCAAAGCCGCTGCCATCCCGGAGGGCCCAAGCCAAAAGGCTCCCCGAGACGAT	WT	TwoExp	id_uc003wwt.3_213_WT	id_uc003wwt.3_213_WT	id_uc003wwt.3_213
ATGGGGTTCGGTATGCGCAAACAATATTTGTCAGACTCCAGAGAACAGGTTCTAGTCCTGCTCTGAGATTTGGTCTAAATGTGGAGTTATAAAGGCTCCCCGAGACGAT	WT	PredictedTRUB1	id_uc002txt.4_322_WT	id_uc002txt.4_322_WT	id_uc002txt.4_322
ATGGGGTTCGGTATGCGCTGCCAAATGGGATTCCCATTTCCGGGAAAGTGTAGAGAAAACCATACCTTACTCAGACAAACTCTGAGGCATAAAGGCTCCCCGAGACGAT	WT	TwoExp	id_uc002sqz.4_613_WT	id_uc002sqz.4_613_WT	id_uc002sqz.4_613
ATGGGGTTCGGTATGCGCCAAGGGAGACATCCTAAGAGAAGTACAACAGTTCCATCCTGCTGTTAGAAACTCATCTGAGGTGACGGTCGCGAAGGCTCCCCGAGACGAT	WT	PredictedTRUB1	id_uc002zir.1_2517_WT	id_uc002zir.1_2517_WT	id_uc002zir.1_2517
ATGGGGTTCGGTATGCGCCACGGGAGTGCGCCTGCCCACCGGCTACTACTTCGGGGCCTCCGCCGGCACCGGCGACCTGTCTGTGAAGTCGAAGGCTCCCCGAGACGAT	WT	TwoExp	id_uc003mge.3_996_WT	id_uc003mge.3_996_WT	id_uc003mge.3_996
ATGGGGTTCGGTATGCGCTGATGTGACTGAAGGGAAGTGTGCCCCATTCTTTTACGGCGGATGTGGCGGCAACCGGAACAACTTATTATGAAAGGCTCCCCGAGACGAT	WT	TwoExp	id_uc002ylz.3_1160_WT	id_uc002ylz.3_1160_WT	id_uc002ylz.3_1160
ATGGGGTTCGGTATGCGCAGACTCATTCCTGATTGAAATCACAGCCAATATTCTCAAGTTCCAAGACACCGATGGCAAACACCGGATAAGAAAGGCTCCCCGAGACGAT	WT	TwoExp	id_uc001arc.3_807_WT	id_uc001arc.3_807_WT	id_uc001arc.3_807
ATGGGGTTCGGTATGCGCCGACACCTTCAATGACATTGAGAAACGCAAGTTCAAGTCTTTGCTACTGCACAAGCGAACCGCTAATATTCAAAAGGCTCCCCGAGACGAT	WT	IdentifiedTRUB1	id_uc001tuw.3_1290_WT	id_uc001tux.3_1383_WT	id_uc001tux.3_1383
ATGGGGTTCGGTATGCGCCGACACCTTCAATGACATTGAGAAACGCAAGTTCAAGTCTTTGCTACTGCACAAGCGAACCGCTAATATTCAAAAGGCTCCCCGAGACGAT	WT	TwoExp	id_uc001tuw.3_1290_WT	id_uc001tux.3_1383_WT	id_uc001tux.3_1383
ATGGGGTTCGGTATGCGCCGACACCTTCAATGACATTGAGAAACGCAAGTTCAAGTCTTTGCTACTGCACAAGCGAACCGCTACACCTAACAAGGCTCCCCGAGACGAT	WT	IdentifiedTRUB1	id_uc001tuw.3_1290_WT	id_uc001tuw.3_1290_WT	id_uc001tuw.3_1290
ATGGGGTTCGGTATGCGCCGACACCTTCAATGACATTGAGAAACGCAAGTTCAAGTCTTTGCTACTGCACAAGCGAACCGCTACACCTAACAAGGCTCCCCGAGACGAT	WT	TwoExp	id_uc001tuw.3_1290_WT	id_uc001tuw.3_1290_WT	id_uc001tuw.3_1290
ATGGGGTTCGGTATGCGCGCAGCTCATCTTTCTGGTGGACTCCAATCCCTTTCCCTTTGGCTATATCAGCAACTACACCGTCTCGCTAGCGAAGGCTCCCCGAGACGAT	WT	TwoExp	id_uc002cos.1_8711_WT	id_uc002cos.1_8711_WT	id_uc002cos.1_8711
ATGGGGTTCGGTATGCGCAGCGGGGATTCCTGAATGTGGCACCGATGCTCTCCGGTTTGGATTATGTGCCTACATGTCCCAGGCTCACCCGAAGGCTCCCCGAGACGAT	WT	Pus1	id_uc003nxe.3_3189_WT	id_uc003nxe.3_3189_WT	id_uc003nxe.3_3189
ATGGGGTTCGGTATGCGCTTCCGTGAGACTGGTCCCTGGTGCCAAAAAGATTGGGAAAATGAGGTACGTTAGTGTTCGCGATTTGCCGAGAAAGGCTCCCCGAGACGAT	WT	TwoExp	id_uc003jht.2_628_WT	id_uc003jht.2_628_WT	id_uc003jht.2_628
ATGGGGTTCGGTATGCGCCTACTTTGCTGGAGTGATGGTGCGACTGATGTTGACTTTGACTCCAGTCGTGTGTATGCTGTCTGTAAACTTCAAGGCTCCCCGAGACGAT	WT	TwoExp	id_uc011axe.2_1386_WT	id_uc011axe.2_1386_WT	id_uc011axe.2_1386
ATGGGGTTCGGTATGCGCGAGAGAGAAATGCTGGGGTGCAGCTTCAAGCTTAGGACCACCCACCATGCCTATCCAGGTGCTGAGACTGGGGAAGGCTCCCCGAGACGAT	WT	TwoExp	id_uc002ptg.3_163_WT	id_uc002ptg.3_163_WT	id_uc002ptg.3_163
ATGGGGTTCGGTATGCGCCGATTGCGTGGTCAGTGATTGCGAGCTTGGATTAGAAGAACAAGAAAGACTCCACCTACTATGGAACCATCATAAGGCTCCCCGAGACGAT	WT	TwoExp	id_uc003jso.4_231_WT	id_uc003jso.4_231_WT	id_uc003jso.4_231
ATGGGGTTCGGTATGCGCCCTGCCGCAGCCCCCGCCCGCCCGCAGAGCTTTTGAAAGGCGGCGGGAGGCGGCGAGCGCCATGGATGCGGACAAGGCTCCCCGAGACGAT	WT	TwoExp	id_uc003xuw.3_256_WT	id_uc003xuw.3_256_WT	id_uc003xuw.3_256
ATGGGGTTCGGTATGCGCCAAAAGCAAACACGGAAAAGCCGACATCGGCCTGGCTGCCTGGGGACGCAAGGCCCTGGACATTGCGCATGTTAAGGCTCCCCGAGACGAT	WT	CTGsites	id_uc002xaj.3_345_WT	id_uc002xaj.3_345_WT	id_uc002xaj.3_345
ATGGGGTTCGGTATGCGCCAAAAGCAAACACGGAAAAGCCGACATCGGCCTGGCTGCCTGGGGACGCAAGGCCCTGGACATTGACTACATGAAGGCTCCCCGAGACGAT	WT	CTGsites	id_uc002xaj.3_345_WT	id_uc002xaj.3_345_WT	id_uc002xaj.3_345
ATGGGGTTCGGTATGCGCTCCTTGGCAGCTGTATTCTGGAGTCTGGATGTTGCTCTCTAAAGACCTTTAATAAAATTTTGTACAGATGATCAAGGCTCCCCGAGACGAT	WT	TwoExp	id_uc001owh.3_803_WT	id_uc001owh.3_803_WT	id_uc001owh.3_803
ATGGGGTTCGGTATGCGCCGTTCCACCGCTCGGGTTTGGCTGGGTGCTGTTCAAGTCAGTAGAAGAACCATTTCTTCGAATTCGGGGTCGTAAGGCTCCCCGAGACGAT	WT	PredictedTRUB1	id_uc010acn.3_376_WT	id_uc010acn.3_376_WT	id_uc010acn.3_376
ATGGGGTTCGGTATGCGCTGGGCGCCGCCGGCTCCTCCGCGCTGGCGCGCTTTGTCCTCCTCGCGCAATCCCGGCCCGGGTGGGTGAACACAAGGCTCCCCGAGACGAT	WT	Dkc1	id_uc001hms.3_283_WT	id_uc001hms.3_283_WT	id_uc001hms.3_283
ATGGGGTTCGGTATGCGCAGAAGATAGGCCGAGGACAGTTCAGCGAGGTGTACAAGGCCACCTGCCTGCTGGACAGGAAGACAAATATTTTAAGGCTCCCCGAGACGAT	WT	TwoExp	id_uc004boh.3_542_WT	id_uc004boh.3_542_WT	id_uc004boh.3_542
ATGGGGTTCGGTATGCGCAGGCCACCGGGGCCCCGGCGCCGTCCCGCCCCTGCGCCCCCGAGCCGGCGGCCTCGCCCGCGGGGGGTAATTAAAGGCTCCCCGAGACGAT	WT	CTGsites	id_uc002jsk.1_207_WT	id_uc002jsk.1_207_WT	id_uc002jsk.1_207
ATGGGGTTCGGTATGCGCAGGCCACCGGGGCCCCGGCGCCGTCCCGCCCCTGCGCCCCCGAGCCGGCGGCCTCGCCCGCGGGGAGTTACCAAAGGCTCCCCGAGACGAT	WT	CTGsites	id_uc002jsk.1_207_WT	id_uc002jsk.1_207_WT	id_uc002jsk.1_207
ATGGGGTTCGGTATGCGCGCGCAGGACTCCACAACCTTGGCAACACCTGCTTTCTCAATGCCACCATCCAGTGCTTGACCTACACCTGGAGAAGGCTCCCCGAGACGAT	WT	TwoExp	id_uc002jvz.1_720_WT	id_uc002jvz.1_720_WT	id_uc002jvz.1_720
ATGGGGTTCGGTATGCGCAAGTGCATTAAAGCAGCCATCAGCAGGGACCCTTTCTACGAAATGCTCGCAGCACGGAAAAAGAACCTAAGTTAAGGCTCCCCGAGACGAT	WT	Pus1	id_uc002jvw.3_1209_WT	id_uc002jvw.3_1209_WT	id_uc002jvw.3_1209
ATGGGGTTCGGTATGCGCGCTAGTACGGCTGTCCGGAGGTCAGCCTGATTTCAACCCAGGTGCCCCTGGCCTGGCCAGCAGTGCAAAACACAAGGCTCCCCGAGACGAT	WT	Pus1	id_uc002gse.1_1206_WT	id_uc002gse.1_1206_WT	id_uc002gse.1_1206
ATGGGGTTCGGTATGCGCGCCGCGGCGGCGGCTGCGGCCGCTGGCAGCGCTGGCCCTGGTCCTGGCGCTGGCCCCGGGGCTGCGATATTCCAAGGCTCCCCGAGACGAT	WT	CTGsites	id_uc001hjd.3_105_WT	id_uc001hjd.3_105_WT	id_uc001hjd.3_105
ATGGGGTTCGGTATGCGCGCCGCGGCGGCGGCTGCGGCCGCTGGCAGCGCTGGCCCTGGTCCTGGCGCTGGCCCCGGGGCTGCAGCATTATAAGGCTCCCCGAGACGAT	WT	CTGsites	id_uc001hjd.3_105_WT	id_uc001hjd.3_105_WT	id_uc001hjd.3_105
ATGGGGTTCGGTATGCGCGATTTCATCGAGAAATTGGTACCATTGTTGGATACTGGTGACATCATCATTGACGGAGGAAATTCGGGTAGTTAAGGCTCCCCGAGACGAT	WT	TwoExp	id_uc001arc.3_370_WT	id_uc001arc.3_370_WT	id_uc001arc.3_370
ATGGGGTTCGGTATGCGCGCCGGCCTCCCGCGCCCGCGCAGCCCCGCGTCTGCGTCCGGCCGGAGACGCCGGGCCCCGCGCCGTTGACTGCAAGGCTCCCCGAGACGAT	WT	CTGsites	id_uc010wsy.1_261_WT	id_uc010wsy.1_261_WT	id_uc010wsy.1_261
ATGGGGTTCGGTATGCGCGCCGGCCTCCCGCGCCCGCGCAGCCCCGCGTCTGCGTCCGGCCGGAGACGCCGGGCCCCGCGCCGCCCAAACAAAGGCTCCCCGAGACGAT	WT	CTGsites	id_uc010wsy.1_261_WT	id_uc010wsy.1_261_WT	id_uc010wsy.1_261
ATGGGGTTCGGTATGCGCTCGCGGCGGAACCCGAGGACAGGAGCCTCAGATGAAAGAAACAATCATGAACCAGGAAAAACTCGGAGAAGACAAGGCTCCCCGAGACGAT	WT	TwoExp	id_uc003kcr.1_378_WT	id_uc003kcr.1_378_WT	id_uc003kcr.1_378
ATGGGGTTCGGTATGCGCACCTCTTGACCCAGGACAACGGCATTCTGACATTCTCAAACCTGAGCCCTGGCCAGTATTACTTCGCCAATTGAAGGCTCCCCGAGACGAT	WT	TwoExp	id_uc002dcv.3_2813_WT	id_uc002dcv.3_2813_WT	id_uc002dcv.3_2813
ATGGGGTTCGGTATGCGCACCTCTTGACCCAGGACAACGGCATTCTGACATTCTCAAACCTGAGCCCTGGCCAGTATTACTTCTAGGCAATAAGGCTCCCCGAGACGAT	WT	TwoExp	id_uc002deq.3_2882_WT	id_uc002deq.3_2882_WT	id_uc002deq.3_2882
ATGGGGTTCGGTATGCGCACCTCTTGACCCAGGACAACGGCATTCTGACATTCTCAAACCTGAGCCCTGGCCAGTATTACTTCTAGGCAATAAGGCTCCCCGAGACGAT	WT	TwoExp	id_uc002deq.3_2882_WT	id_uc002deq.3_2882_WT	id_uc002deq.3_2882
ATGGGGTTCGGTATGCGCACCTCTTGACCCAGGACAACGGCATTCTGACATTCTCAAACCTGAGCCCTGGCCAGTATTACTTCGTGCAAGGAAGGCTCCCCGAGACGAT	WT	TwoExp	id_uc002deq.3_2882_WT	id_uc002dfe.3_2819_WT	id_uc002dfe.3_2819
ATGGGGTTCGGTATGCGCACCTCTTGACCCAGGACAACGGCATTCTGACATTCTCAAACCTGAGCCCTGGCCAGTATTACTTCGTGCAAGGAAGGCTCCCCGAGACGAT	WT	TwoExp	id_uc002deq.3_2882_WT	id_uc002dfe.3_2819_WT	id_uc002dfe.3_2819
ATGGGGTTCGGTATGCGCCTGGGTAGCTACAAAGTTCCTCAGGGGTTTCATTTTGCAGGCATGTCTCTGAGCTTCTATACCTGCATTAAGTAAGGCTCCCCGAGACGAT	WT	TwoExp	id_uc001ber.3_2553_WT	id_uc001ber.3_2553_WT	id_uc001ber.3_2553
ATGGGGTTCGGTATGCGCATTGGAGCGTTCCTCTTGTGGCAGTGTCCTTTTTCATGGTTACTTGCCCCCACCAGGTATTCCTAACTTAATCAAGGCTCCCCGAGACGAT	WT	TwoExp	id_uc001hks.3_669_WT	id_uc001hks.3_669_WT	id_uc001hks.3_669
ATGGGGTTCGGTATGCGCGAGAGCCTGAGGCCCAAGCAGGACCCGGGGGTTCCAGCCCCTAGCTGCTCTGGAGTGGGGGAGGTGAACTTGTAAGGCTCCCCGAGACGAT	WT	PredictedTRUB1	id_uc002gkd.3_4539_WT	id_uc002gkd.3_4539_WT	id_uc002gkd.3_4539
ATGGGGTTCGGTATGCGCAGCCGTTTGAGTTTGGCTGCGGGTGGAGAACGTTTGTCAGGGGCCCGGCCAAGAAGGAGGCCCGCTCTCAACAAAGGCTCCCCGAGACGAT	WT	TwoExp	id_uc002rdm.3_469_WT	id_uc002rdm.3_469_WT	id_uc002rdm.3_469
ATGGGGTTCGGTATGCGCCGGCGGCGGCGGCGGCGGCAGCGGCGGCGGCCTGGGCCCGGGCGCAGCGGCGGCGGCGGCGGGGCAATCCAGCAAGGCTCCCCGAGACGAT	WT	CTGsites	id_uc002mpz.3_78_WT	id_uc002mpz.3_78_WT	id_uc002mpz.3_78
ATGGGGTTCGGTATGCGCCGGCGGCGGCGGCGGCGGCAGCGGCGGCGGCCTGGGCCCGGGCGCAGCGGCGGCGGCGGCGGGGCAGCCGTGTAAGGCTCCCCGAGACGAT	WT	CTGsites	id_uc002mpz.3_78_WT	id_uc002mpz.3_78_WT	id_uc002mpz.3_78
ATGGGGTTCGGTATGCGCCCGGGGCCTGCCGCGTGTGAGCCTGGCCAACTTAAAGCCGAATCCCGGCTCCAAGAAACCGGAGATTACAAATAAGGCTCCCCGAGACGAT	WT	TwoExp	id_uc003xsa.2_144_WT	id_uc003xsa.2_144_WT	id_uc003xsa.2_144
ATGGGGTTCGGTATGCGCCGTGACGGTACGGCCGGGCCTGGCCAGGGCGCTGAGCGGGTCCACCGAGCCCTGCGCGCAGCTGTTACTCCGCAAGGCTCCCCGAGACGAT	WT	CTGsites	id_uc011ajk.1_171_WT	id_uc011ajk.1_171_WT	id_uc011ajk.1_171
ATGGGGTTCGGTATGCGCCGTGACGGTACGGCCGGGCCTGGCCAGGGCGCTGAGCGGGTCCACCGAGCCCTGCGCGCAGCTGTGTCGTTGGAAGGCTCCCCGAGACGAT	WT	CTGsites	id_uc011ajk.1_171_WT	id_uc011ajk.1_171_WT	id_uc011ajk.1_171
ATGGGGTTCGGTATGCGCGTGTGCTCCGAGCAACATCGCCGTGGACCAGCTAACGGAGAAGATCCACCAGACGGGGCTAAAGGCTGCCATCAAGGCTCCCCGAGACGAT	WT	Pus1	id_uc002nkf.3_1865_WT	id_uc002nkf.3_1865_WT	id_uc002nkf.3_1865
ATGGGGTTCGGTATGCGCTTACCATATAGAATATTGGAAGAATTAAATGTTCAAGTCATGTAAATCATATAGTAGGATCTTGAAGCACGAGAAGGCTCCCCGAGACGAT	WT	PredictedTRUB1	id_uc003ini.1_1401_WT	id_uc003ini.1_1401_WT	id_uc003ini.1_1401
ATGGGGTTCGGTATGCGCTGGACGAGGGCAGAACCACAACGTGCAAGGGTTCCACCCCTACCGACGCTAGCCCGCGGCGCCGCTTAGTTCCAAGGCTCCCCGAGACGAT	WT	IdentifiedTRUB1	id_uc002lsn.3_1395_WT	id_uc002lsn.3_1395_WT	id_uc002lsn.3_1395
ATGGGGTTCGGTATGCGCTGGACGAGGGCAGAACCACAACGTGCAAGGGTTCCACCCCTACCGACGCTAGCCCGCGGCGCCGCTTAGTTCCAAGGCTCCCCGAGACGAT	WT	TwoExp	id_uc002lsn.3_1395_WT	id_uc002lsn.3_1395_WT	id_uc002lsn.3_1395
ATGGGGTTCGGTATGCGCTGGACGAGGGCAGAACCACAACGTGCAAGGGTTCCACCCCTACCGACGCTAGCCCGCGGCGCCGCAGAGGTGCAAGGCTCCCCGAGACGAT	WT	IdentifiedTRUB1	id_uc002lsn.3_1395_WT	id_uc002lsn.3_1395_WT	id_uc002lsn.3_1395
ATGGGGTTCGGTATGCGCTGGACGAGGGCAGAACCACAACGTGCAAGGGTTCCACCCCTACCGACGCTAGCCCGCGGCGCCGCAGAGGTGCAAGGCTCCCCGAGACGAT	WT	TwoExp	id_uc002lsn.3_1395_WT	id_uc002lsn.3_1395_WT	id_uc002lsn.3_1395
ATGGGGTTCGGTATGCGCGGAGGCACAGCTCGATCGCCCTGGGCAAGGGATTGCTGTGCCTGTGGGCGAGGCCCACCGCCACGTCCTGTTAAAGGCTCCCCGAGACGAT	WT	Pus1	id_uc002jzz.1_1836_WT	id_uc002jzz.1_1836_WT	id_uc002jzz.1_1836
ATGGGGTTCGGTATGCGCACTGACCGCTGCTTCTCCTACGGGGGGAGTGTTCAAGCCACCTTTAGCCGGTCTCCAAGCAGCTGTAATGACGAAGGCTCCCCGAGACGAT	WT	PredictedTRUB1	id_uc001rya.3_577_WT	id_uc001rya.3_577_WT	id_uc001rya.3_577
ATGGGGTTCGGTATGCGCGTAATGAATGTGACAAGGTCTTCAGTAACAGTTCAAACCTTGTACAACATCAAAGAATTCATACTTCTCCGCAAAGGCTCCCCGAGACGAT	WT	PredictedTRUB1	id_uc002pzc.3_723_WT	id_uc002pzc.3_723_WT	id_uc002pzc.3_723
ATGGGGTTCGGTATGCGCATATTCCTGAGTTCTGAACTGCAAGAGGAAGTTCCAACCTTAAGCAGAAAAGATCACTTTCCAGATTGAGATAAAGGCTCCCCGAGACGAT	WT	PredictedTRUB1	id_uc002het.3_2356_WT	id_uc002het.3_2356_WT	id_uc002het.3_2356
ATGGGGTTCGGTATGCGCCTCCAGGGTCCTGTATCCAAATGATAACTTCTTTGAGGGGAAGGAGCTGCGGCTGAAGCAGGAGTAATCAGCGAAGGCTCCCCGAGACGAT	WT	Pus1	id_uc002wup.3_970_WT	id_uc002wup.3_970_WT	id_uc002wup.3_970
ATGGGGTTCGGTATGCGCTCTGATTGCAAGATCCAAAATGGCACATCAGGTATTCGTTTCATCTACACCAGAGAAGGCAGACCTTTATGAAAAGGCTCCCCGAGACGAT	WT	TwoExp	id_uc004ehn.3_355_WT	id_uc004ehn.3_355_WT	id_uc004ehn.3_355
ATGGGGTTCGGTATGCGCCACCGAAATGGCCGCGTCCAGTCAAGGAAACTTTGAGGGAAATTTTGAGTCACTGGACCTTGCGGCATCAAGCAAGGCTCCCCGAGACGAT	WT	TwoExp	id_uc004fmw.3_291_WT	id_uc004fmw.3_291_WT	id_uc004fmw.3_291
ATGGGGTTCGGTATGCGCTGTGACTCTCAGCTCCACAGGCCGGAATGGGTTCAAGTCCCACGCGCTGCAGCTGAACAACCGCCTATTCCCAAAGGCTCCCCGAGACGAT	WT	PredictedTRUB1	id_uc011doy.2_4068_WT	id_uc011doy.2_4068_WT	id_uc011doy.2_4068
ATGGGGTTCGGTATGCGCGCAGCTCATCTTTCTGGTGGACTCCAATCCCTTTCCCTTTGGCTATATCAGCAACTACACCGTCTAAGGGACCAAGGCTCCCCGAGACGAT	WT	TwoExp	id_uc002ddh.2_344_WT	id_uc002ddh.2_344_WT	id_uc002ddh.2_344
ATGGGGTTCGGTATGCGCAAAAGAAGGCTAAGAAGCCTAAACATAGTCGATCGCGATCCGTGGAGAAATCTCAAAGGTCTGGTGTAGGCTGAAGGCTCCCCGAGACGAT	WT	TwoExp	id_uc003ppp.4_2490_WT	id_uc003ppp.4_2490_WT	id_uc003ppp.4_2490
ATGGGGTTCGGTATGCGCGGTGGTTCAGAAACCAGACTACCTTAACGATTTTACCCACGAAATCCCAAATATCCAGACTGACTACAACTACAAGGCTCCCCGAGACGAT	WT	Pus1	id_uc001lha.2_944_WT	id_uc001lha.2_944_WT	id_uc001lha.2_944
ATGGGGTTCGGTATGCGCTGGCTCATGAGTTTACAGAGAAGAGGAAACCCTTTCAAGCTAACAACGTCTCCCTAAGCAACATGGCCCGCCTAAGGCTCCCCGAGACGAT	WT	TwoExp	id_uc003zxw.3_826_WT	id_uc003zxw.3_826_WT	id_uc003zxw.3_826
ATGGGGTTCGGTATGCGCGGGGTTCTCACTCTAGCTTGGGGAGCCAGGGTTCTAGCCCTGTATCTGTCATGGGCACCTGCTGTCGCCGGAGAAGGCTCCCCGAGACGAT	WT	PredictedTRUB1	id_uc002dof.3_2161_WT	id_uc002dof.3_2161_WT	id_uc002dof.3_2161
ATGGGGTTCGGTATGCGCACCCTGCCTCAGAAAGGACCCCACTTTTGGGTTCTAGCCCCACTCTTCCCACCTCCTTTGGTTCCTAGGTGCGAAGGCTCCCCGAGACGAT	WT	IdentifiedTRUB1	id_uc002fzs.3_1387_WT	id_uc002fzs.3_1387_WT	id_uc002fzs.3_1387
ATGGGGTTCGGTATGCGCACCCTGCCTCAGAAAGGACCCCACTTTTGGGTTCTAGCCCCACTCTTCCCACCTCCTTTGGTTCCTAGGTGCGAAGGCTCCCCGAGACGAT	WT	TwoExp	id_uc002fzs.3_1387_WT	id_uc002fzs.3_1387_WT	id_uc002fzs.3_1387
ATGGGGTTCGGTATGCGCACCCTGCCTCAGAAAGGACCCCACTTTTGGGTTCTAGCCCCACTCTTCCCACCTCCTTTGGTTCCCGCGGTCGAAGGCTCCCCGAGACGAT	WT	IdentifiedTRUB1	id_uc002fzs.3_1387_WT	id_uc002fzs.3_1387_WT	id_uc002fzs.3_1387
ATGGGGTTCGGTATGCGCACCCTGCCTCAGAAAGGACCCCACTTTTGGGTTCTAGCCCCACTCTTCCCACCTCCTTTGGTTCCCGCGGTCGAAGGCTCCCCGAGACGAT	WT	TwoExp	id_uc002fzs.3_1387_WT	id_uc002fzs.3_1387_WT	id_uc002fzs.3_1387
ATGGGGTTCGGTATGCGCGGGAGACCAGCGGGCCATGACAAGCTCCAGGCTTTGGTTTTCGCTGCTGCTGGCGGCAGCGTTCGCATGGCAGAAGGCTCCCCGAGACGAT	WT	TwoExp	id_uc002aun.4_225_WT	id_uc002aun.4_225_WT	id_uc002aun.4_225
ATGGGGTTCGGTATGCGCGCCTGCCAGTCTCCACCTGCTCCTCATCCTACTCTCATCACACACTGGATGCCGTATGGATCCCTCCAACGTGAAGGCTCCCCGAGACGAT	WT	Pus1	id_uc001mef.3_980_WT	id_uc001mef.3_980_WT	id_uc001mef.3_980
ATGGGGTTCGGTATGCGCCAAAAGCAGGAGCAGCTCCATATGTGCAGGCATTTGACTCGCTGCTTGCTGGTCCTGTGGCAGAGGATCGATAAAGGCTCCCCGAGACGAT	WT	TwoExp	id_uc001cey.4_351_WT	id_uc001cey.4_351_WT	id_uc001cey.4_351
ATGGGGTTCGGTATGCGCTCCCCGGGAGAGCAGAGCTTGCGCCTCGGGCATAGGGACGTGGGGTGCAGGCGCCAACATCAGTGGAGACAGGAAGGCTCCCCGAGACGAT	WT	TwoExp	id_uc002lqr.1_2514_WT	id_uc002lqr.1_2514_WT	id_uc002lqr.1_2514
ATGGGGTTCGGTATGCGCAAGAAGCAAGAGTACTGGGCTTTACCATGAGTTCAAATCTCATTTCTGCCAATTCCTATGTCTAACCTTGTCCAAGGCTCCCCGAGACGAT	WT	PredictedTRUB1	id_uc001ejb.3_496_WT	id_uc001ejb.3_496_WT	id_uc001ejb.3_496
ATGGGGTTCGGTATGCGCGAGGTCCTGCGCGCTTTCCGCGCCAGCTTCAGTGTCAGCTCGCGAGCCCTGGCGTCGCGTAGGAGCCACTAAAAAGGCTCCCCGAGACGAT	WT	Pus1	id_uc001ofn.3_144_WT	id_uc001ofn.3_144_WT	id_uc001ofn.3_144
ATGGGGTTCGGTATGCGCCAGCAGGCTCTCTGGAGTCCACAGAACCCATATATGTCTACAAAGCACAAGGTGCAGGAGTCACGCGGGATAGAAGGCTCCCCGAGACGAT	WT	TwoExp	id_uc002dda.4_2254_WT	id_uc002dda.4_2254_WT	id_uc002dda.4_2254
ATGGGGTTCGGTATGCGCTTCTTCTGTTGAAAGGCTTTGGCTTCCCGCTGTAGAGCTGCTCCCGCCACCACCTGCTGGGGTCCACTGTAGGAAGGCTCCCCGAGACGAT	WT	TwoExp	id_uc001bnr.4_963_WT	id_uc001bnr.4_963_WT	id_uc001bnr.4_963
ATGGGGTTCGGTATGCGCAGTCCCCACCTCTCTCAGCTTCCGGCTGGTAGTAGTTCCGCTTCCTGTCCGACTGTGGTGTCTTTCAAGGGAGAAGGCTCCCCGAGACGAT	WT	Pus1	id_uc002oav.3_104_WT	id_uc002oav.3_104_WT	id_uc002oav.3_104
ATGGGGTTCGGTATGCGCGGCAGCCGTCCGAAGGCGAGAGCAGGAATGTTTTGACCGAGTCTGCGAGGATCGCCCGTGGCAAAGAGGATCCAAGGCTCCCCGAGACGAT	WT	Pus1	id_uc002zec.4_403_WT	id_uc002zec.4_403_WT	id_uc002zec.4_403
ATGGGGTTCGGTATGCGCGTTGGTGTGTGAAGACGTCAATGTGGATCGGTTCTATCCTGTGCTCTACCCCAAGGCTTCCCGGCTCCCTGATAAGGCTCCCCGAGACGAT	WT	PredictedTRUB1	id_uc001bev.3_525_WT	id_uc001bev.3_525_WT	id_uc001bev.3_525
ATGGGGTTCGGTATGCGCGAAACCATCTGTTACCTGTGTTGATCAAGACTTCAAATCCCAAAAGAACTTCATCATTAACATGATTTCGTCGAAGGCTCCCCGAGACGAT	WT	TwoExp	id_uc002bxi.3_369_WT	id_uc002bxi.3_369_WT	id_uc002bxi.3_369
ATGGGGTTCGGTATGCGCCAAAAAGGAGTTTGCACCCTCAGATGAAGAGCTAGACTCTTACCGTCGTGGAGAGGAATGGGACCAGGTCAAAAAGGCTCCCCGAGACGAT	WT	TwoExp	id_uc002gae.3_387_WT	id_uc002gae.3_387_WT	id_uc002gae.3_387
ATGGGGTTCGGTATGCGCAAATTGCAATGGTGACTATCCAGCTGGTCTTATTTGGGCTAAGTAACCAGATGGTGGTAGCTTTCGGTGTCTTAAGGCTCCCCGAGACGAT	WT	TwoExp	id_uc001dkp.3_386_WT	id_uc001dkp.3_386_WT	id_uc001dkp.3_386
ATGGGGTTCGGTATGCGCTGTCCAGATGGACAGAGTTGATCAGTCTGCTGTAGGCTTTGAATACCAGGGGAAGACTGAGAAGCGAAGTTGCAAGGCTCCCCGAGACGAT	WT	TwoExp	id_uc001opu.3_617_WT	id_uc001opu.3_617_WT	id_uc001opu.3_617
ATGGGGTTCGGTATGCGCGCTGCCGCCGGGCCCCGAGCCGCCCCGCTTCGTGTGCTACTGCGAAGGGGAGGAAAGCGGGGAGGTTCAATCAAAGGCTCCCCGAGACGAT	WT	Pus1	id_uc004cki.3_89_WT	id_uc004cki.3_89_WT	id_uc004cki.3_89
ATGGGGTTCGGTATGCGCTCAGACCATGTCTGACCAGATCATTGGGAGAATTGATGATATGAGTAGTCGCATTGATGATCTGGATCTCGGCAAGGCTCCCCGAGACGAT	WT	TwoExp	id_uc002fgy.1_203_WT	id_uc002fgy.1_203_WT	id_uc002fgy.1_203
ATGGGGTTCGGTATGCGCAGCCTGTGTGTCTCTAAACCAGCCAGGCACTGTAGTGGCCTCAGCCTCCCAGAAGGGTACCCTTACGCTAAGGAAGGCTCCCCGAGACGAT	WT	TwoExp	id_uc004dmk.1_790_WT	id_uc004dmk.1_790_WT	id_uc004dmk.1_790
ATGGGGTTCGGTATGCGCAAAATCATTTTTCTTCTCTGGGAAGGTGAACATTTGTAGCATTGATTTCCCGGATCTGGTAACATTGATCTCTAAGGCTCCCCGAGACGAT	WT	TwoExp	id_uc001vtw.3_183_WT	id_uc001vtw.3_183_WT	id_uc001vtw.3_183
ATGGGGTTCGGTATGCGCGAGTTTAATGGAATATTTTTGTACCCGATGTTTACAGATGCTGTTGGGAAGTTATCAATAAAAAGGTTTAAGTAAGGCTCCCCGAGACGAT	WT	TwoExp	id_uc002njo.3_1398_WT	id_uc002njo.3_1398_WT	id_uc002njo.3_1398
ATGGGGTTCGGTATGCGCGTTCATCCTCCTCCTCCTCCTGCTCCTCCTGGTTGGAGCGCAGTGTCCGGAGCGGGCTGGGGGGACGTGGACGAAGGCTCCCCGAGACGAT	WT	TwoExp	id_uc001lej.1_394_WT	id_uc001lej.1_394_WT	id_uc001lej.1_394
ATGGGGTTCGGTATGCGCGGTACCTCAGCGTTGAGCTCACGGATGATTGATATCCAGACCAGGATGGCTGGGCGAGCATTGGACCCCCATAAAGGCTCCCCGAGACGAT	WT	TwoExp	id_uc003tyv.3_357_WT	id_uc003tyv.3_357_WT	id_uc003tyv.3_357
ATGGGGTTCGGTATGCGCGTTCTACCTGGGAACTTGGAGAGATGGGAACGTTGTCTGTGTGCAGTCTAATCATCTGAAAAACAGATTCGATAAGGCTCCCCGAGACGAT	WT	Pus1	id_uc004egq.3_905_WT	id_uc004egq.3_905_WT	id_uc004egq.3_905
ATGGGGTTCGGTATGCGCGTACCCTTGAATAGGTTTTCTGTAGTCAGAGTTCTAAACTCTAATTTGTAACTTGGACTTTCTAAGGGTAGAGAAGGCTCCCCGAGACGAT	WT	PredictedTRUB1	id_uc003igk.3_3990_WT	id_uc003igk.3_3990_WT	id_uc003igk.3_3990
ATGGGGTTCGGTATGCGCCTCAAATGATAACCGAAGGACGTATGAATGGATTTATTGACCAGATTGATGGAATAGTTCATTTTACCAGTGAAAGGCTCCCCGAGACGAT	WT	TwoExp	id_uc003hoa.3_1191_WT	id_uc003hoa.3_1191_WT	id_uc003hoa.3_1191
ATGGGGTTCGGTATGCGCAGTTCGTCTGACAAAAGTGTAAAAGTTTGGGATGTTGGAACGAGGACTTGTGTTCACACCTTCTTTTGGCGCAAAGGCTCCCCGAGACGAT	WT	TwoExp	id_uc002bdn.3_857_WT	id_uc002bdn.3_857_WT	id_uc002bdn.3_857
ATGGGGTTCGGTATGCGCCCGGCGCCCGCGCCCGCCCCGGCCGCCGCTGCTGGTCCGCCCACGCGCAAGAAGTCCAGGCGGGAATATCCCAAAGGCTCCCCGAGACGAT	WT	CTGsites	id_uc002poq.3_1658_WT	id_uc002poq.3_1658_WT	id_uc002poq.3_1658
ATGGGGTTCGGTATGCGCCCGGCGCCCGCGCCCGCCCCGGCCGCCGCTGCTGGTCCGCCCACGCGCAAGAAGTCCAGGCGGGAATTAATCCAAGGCTCCCCGAGACGAT	WT	CTGsites	id_uc002poq.3_1658_WT	id_uc002poq.3_1658_WT	id_uc002poq.3_1658
ATGGGGTTCGGTATGCGCCTTACAGGGAGAACACAGTTGGCCTCCACCGTTTCTGCCCCACAGAAAACGTAGCAAAGATCAACACTCCCGAAAGGCTCCCCGAGACGAT	WT	TwoExp	id_uc004chl.3_676_WT	id_uc004chl.3_676_WT	id_uc004chl.3_676
ATGGGGTTCGGTATGCGCCCAGCTCAGAGTGCTGCAGCCGCTGCCGCCGATTCCGGATCTCATTGCCACGCGCCCCCGACGACGTTGGCCAAAGGCTCCCCGAGACGAT	WT	TwoExp	id_uc001mok.3_198_WT	id_uc001mok.3_198_WT	id_uc001mok.3_198
ATGGGGTTCGGTATGCGCAAGTGGGATTCAGGAATGGGCCAAGCCAGGGTTCCAGACAGGGTGGGGCTTAGAATGGGGCTTCCCCTTGACGAAGGCTCCCCGAGACGAT	WT	PredictedTRUB1	id_uc004dmz.1_1805_WT	id_uc004dmz.1_1805_WT	id_uc004dmz.1_1805
ATGGGGTTCGGTATGCGCCGCTAGATCCCCCGTTTTCCCAAGAAGAGGGTTCGAGCCCTTGGTGGGGACAGCTGGGGAGATGGAATTTAATAAGGCTCCCCGAGACGAT	WT	PredictedTRUB1	id_uc010ekv.3_5436_WT	id_uc010ekv.3_5436_WT	id_uc010ekv.3_5436
ATGGGGTTCGGTATGCGCTTAAGGGCAGGGAGAAGCTGGCACCTGTACCCTTCTTCTCTCTCCTGCAGTATGAGTGACCACAGCAATACTGAAGGCTCCCCGAGACGAT	WT	TwoExp	id_uc002flv.3_553_WT	id_uc002flv.3_553_WT	id_uc002flv.3_553
ATGGGGTTCGGTATGCGCTGGTCCTAAAAGCTCTGCAGGATGGCCGGGCATATGGGTCTCCATGGTGCAACAAACAGATCACATAAGTTACAAGGCTCCCCGAGACGAT	WT	TwoExp	id_uc002env.3_5395_WT	id_uc002env.3_5395_WT	id_uc002env.3_5395
ATGGGGTTCGGTATGCGCACAGCTGCCCTCATTAGCGGATTCCGTTCCATTATCAAACCCGAGTGGATCCGAATGTTCTCAACATGAAGCAAAGGCTCCCCGAGACGAT	WT	Pus1	id_uc001toq.3_2977_WT	id_uc001toq.3_2977_WT	id_uc001toq.3_2977
ATGGGGTTCGGTATGCGCAAGGAGTTTTTCTTACTGGAGATTTTAATGGTTGGAATCCATTTTCGTACCCATACAAAAAACTGCAGTCAGCAAGGCTCCCCGAGACGAT	WT	TwoExp	id_uc021xav.1_602_WT	id_uc021xav.1_602_WT	id_uc021xav.1_602
ATGGGGTTCGGTATGCGCCCAGTGGCAGTCTGTTCCTGAGAGCACCGTGTTAAAGAAAGTCTCTGGTGTTCTTCGTGGGAACTTTGGACCCAAGGCTCCCCGAGACGAT	WT	Pus1	id_uc002zci.3_1072_WT	id_uc002zci.3_1072_WT	id_uc002zci.3_1072
ATGGGGTTCGGTATGCGCTACTTAGTGAGATCTGGGATGAAGCAGTGGGTTCCAGTCCTACAAGATTTCAGCAATAAGGGCACCCGGCGCCAAGGCTCCCCGAGACGAT	WT	TwoExp	id_uc002eet.3_963_WT	id_uc002eet.3_963_WT	id_uc002eet.3_963
ATGGGGTTCGGTATGCGCTACTTAGTGAGATCTGGGATGAAGCAGTGGGTTCCAGTCCTACAAGATTTCAGCAATAAGGGCACCCGGCGCCAAGGCTCCCCGAGACGAT	WT	IdentifiedTRUB1	id_uc002eet.3_963_WT	id_uc002eet.3_963_WT	id_uc002eet.3_963
ATGGGGTTCGGTATGCGCTACTTAGTGAGATCTGGGATGAAGCAGTGGGTTCCAGTCCTACAAGATTTCAGCAATAAGGGCACGTGTTCCTAAGGCTCCCCGAGACGAT	WT	TwoExp	id_uc002eet.3_963_WT	id_uc002eet.3_963_WT	id_uc002eet.3_963
ATGGGGTTCGGTATGCGCTACTTAGTGAGATCTGGGATGAAGCAGTGGGTTCCAGTCCTACAAGATTTCAGCAATAAGGGCACGTGTTCCTAAGGCTCCCCGAGACGAT	WT	IdentifiedTRUB1	id_uc002eet.3_963_WT	id_uc002eet.3_963_WT	id_uc002eet.3_963
ATGGGGTTCGGTATGCGCCCCCACAATCTGCCGCCGTGGAGGTACCTGGTTTGCTGGCTTTGGCAGAGAACGCAACTCAGGCAATCCTAAAAAGGCTCCCCGAGACGAT	WT	TwoExp	id_uc010rpw.1_521_WT	id_uc010rpw.1_521_WT	id_uc010rpw.1_521
ATGGGGTTCGGTATGCGCAGAGAAAGCCAGGTCTTCACGTTCGTGTAGGTTCGAGACCTTAACGAACTGCAGAGCGCAACAAAATACGGTGAAGGCTCCCCGAGACGAT	WT	IdentifiedTRUB1	id_uc001vjt.1_152_WT	id_uc001vjt.1_152_WT	id_uc001vjt.1_152
ATGGGGTTCGGTATGCGCCCCTCACCTGCCACAGAGCAACCCAGGTTAAATACAGCCCATGCACAAAGCCACAGGCCAAAGCCTTGAGTTAAAGGCTCCCCGAGACGAT	WT	TwoExp	id_uc001ouw.3_2005_WT	id_uc001ouw.3_2005_WT	id_uc001ouw.3_2005
ATGGGGTTCGGTATGCGCTCCAAGGGACAGGAAGGCTGGGGGAGGGAGTTTACAACCCAAGCCATTCCACCCCCTCCCCTGCTTTGAGGTCAAGGCTCCCCGAGACGAT	WT	TwoExp	id_uc001eck.3_3398_WT	id_uc001eck.3_3398_WT	id_uc001eck.3_3398
ATGGGGTTCGGTATGCGCTCTTCAAAGCGCATAAATCTTTCGCCTTTTACTAAAGATTTCCGTGGAGAGAAAGTTGTGAGTTTTGAATTGAAAGGCTCCCCGAGACGAT	WT	TwoExp	id_uc021omv.1_4191_WT	id_uc021omv.1_4191_WT	id_uc021omv.1_4191
ATGGGGTTCGGTATGCGCAGTGGGATTCACAGATTATCAATGACCGGATCTATCCATATGCTGCCATCTCCTATGAAGAATGGATGCGACGAAGGCTCCCCGAGACGAT	WT	Pus1	id_uc009ykt.3_1620_WT	id_uc009ykt.3_1620_WT	id_uc009ykt.3_1620
ATGGGGTTCGGTATGCGCGTGCTATCCGCCCAGGTGCTCCTAGAGTACCATTTAGTACTATGAGACCAGCTTCTTCACAGGTTCCTGCGGTAAGGCTCCCCGAGACGAT	WT	TwoExp	id_uc001upy.3_1431_WT	id_uc001upy.3_1431_WT	id_uc001upy.3_1431
ATGGGGTTCGGTATGCGCGGCCTGAGGATGTGATCAACTTTAAGAAGATTTACAAAACGCTCAAGAAAGATGAGGATATCCCATTTACGTAAAGGCTCCCCGAGACGAT	WT	TwoExp	id_uc001ycj.3_2207_WT	id_uc001ycj.3_2207_WT	id_uc001ycj.3_2207
ATGGGGTTCGGTATGCGCGCGATGGTGACACCCTGACTCTCAGTGCAGCCTACACAAAGGACCTACTACTGCCTATCAAAACGGTAGCGAAAAGGCTCCCCGAGACGAT	WT	TwoExp	id_uc001hms.3_637_WT	id_uc001hms.3_637_WT	id_uc001hms.3_637
ATGGGGTTCGGTATGCGCGATTCCCCATCACCAATTCGGCTGGGGCGCCCTGCAAGGCCGCAGGCAGGATGAACATTCTGGCAAAGACGGAAAGGCTCCCCGAGACGAT	WT	CTGsites	id_uc010was.1_156_WT	id_uc010was.1_156_WT	id_uc010was.1_156
ATGGGGTTCGGTATGCGCGATTCCCCATCACCAATTCGGCTGGGGCGCCCTGCAAGGCCGCAGGCAGGATGAACATTCTGGCACCACAGTGAAGGCTCCCCGAGACGAT	WT	CTGsites	id_uc010was.1_156_WT	id_uc010was.1_156_WT	id_uc010was.1_156
ATGGGGTTCGGTATGCGCGGAGTGGACTTTGGCCTCTCCATCCTGTGGTTTCTGATCTTCACTCCCTGTGCCTTCCTTTGTTGCGCCACTCAAGGCTCCCCGAGACGAT	WT	TwoExp	id_uc002azb.1_648_WT	id_uc002azb.1_648_WT	id_uc002azb.1_648
ATGGGGTTCGGTATGCGCTGGGATTTAATGAATTTGTCTGAAAAACATGATAAGATACCAGAAATCTGGGAAGGCCATAATATGGCGTGGCAAGGCTCCCCGAGACGAT	WT	TwoExp	id_uc001ift.3_1353_WT	id_uc001ift.3_1353_WT	id_uc001ift.3_1353
ATGGGGTTCGGTATGCGCCTTTGAGTAGCTCCTGGTGGACTCAACCCTGTTCAACTCAGAGACGGGCCTCCTCTCACTGATGCAAGCTCCTAAGGCTCCCCGAGACGAT	WT	PredictedTRUB1	id_uc004chp.3_1533_WT	id_uc004chp.3_1533_WT	id_uc004chp.3_1533
ATGGGGTTCGGTATGCGCGCACTGCTCCCGCCTCCACCAGCGCCTCCCACTGATGTCGTGGTCCCGGGCCTGGCCCAGGGGCCTAGCGAGGAAGGCTCCCCGAGACGAT	WT	TwoExp	id_uc002ooh.1_5052_WT	id_uc002ooh.1_5052_WT	id_uc002ooh.1_5052
ATGGGGTTCGGTATGCGCACGGGCAAGGCAGCCCAGGGGGCTGTGTCTGTTCAAGTCAGGCTTCCCCGGCCCCTCGCGCAGCAGCTAAACGAAGGCTCCCCGAGACGAT	WT	IdentifiedTRUB1	id_uc002hee.3_889_WT	id_uc002hee.3_889_WT	id_uc002hee.3_889
ATGGGGTTCGGTATGCGCACGGGCAAGGCAGCCCAGGGGGCTGTGTCTGTTCAAGTCAGGCTTCCCCGGCCCCTCGCGCAGCAGCTAAACGAAGGCTCCCCGAGACGAT	WT	TwoExp	id_uc002hee.3_889_WT	id_uc002hee.3_889_WT	id_uc002hee.3_889
ATGGGGTTCGGTATGCGCACGGGCAAGGCAGCCCAGGGGGCTGTGTCTGTTCAAGTCAGGCTTCCCCGGCCCCTCGCGCAGCACTAGGTTCAAGGCTCCCCGAGACGAT	WT	IdentifiedTRUB1	id_uc002hee.3_889_WT	id_uc002hee.3_889_WT	id_uc002hee.3_889
ATGGGGTTCGGTATGCGCACGGGCAAGGCAGCCCAGGGGGCTGTGTCTGTTCAAGTCAGGCTTCCCCGGCCCCTCGCGCAGCACTAGGTTCAAGGCTCCCCGAGACGAT	WT	TwoExp	id_uc002hee.3_889_WT	id_uc002hee.3_889_WT	id_uc002hee.3_889
ATGGGGTTCGGTATGCGCCAGGGAGTTGGCTCTCTTGGTGGAGATGACTTTCCTGGGCCTCTGGATGACAATCTTCCAAAGGACTCAATCTAAGGCTCCCCGAGACGAT	WT	TwoExp	id_uc001yck.3_617_WT	id_uc001yck.3_617_WT	id_uc001yck.3_617
ATGGGGTTCGGTATGCGCATTATTCTGCTCCACTTCTAGCCCACACAGCATACCTCTGACAGAGGTGATTGGGCCGATATGGCACCACGACAAGGCTCCCCGAGACGAT	WT	TwoExp	id_uc003ugq.4_593_WT	id_uc003ugq.4_593_WT	id_uc003ugq.4_593
ATGGGGTTCGGTATGCGCTCGCGCTGTGCGCCACAGGCGCCCAGGGGCTCTACTTCCACATCGGCGAGACCGAGAAGCGCTGTTGATTGAAAAGGCTCCCCGAGACGAT	WT	TwoExp	id_uc003tli.3_114_WT	id_uc003tli.3_114_WT	id_uc003tli.3_114
ATGGGGTTCGGTATGCGCCGCAACTGAAACAAAGGTGGCACAGCAACTGTTCCAATCCCGTGTCTTTCCTCATGGCTTCCCAGGCCTGAGCAAGGCTCCCCGAGACGAT	WT	PredictedTRUB1	id_uc004ftl.1_309_WT	id_uc004ftl.1_309_WT	id_uc004ftl.1_309
ATGGGGTTCGGTATGCGCCAGCAGGGCATCTTGGAAAAGGAACTCTTGGTTCGATACCTGGAGCAGAGGAGGGGAAAGTCCAGAAAATCCTAAGGCTCCCCGAGACGAT	WT	TwoExp	id_uc002eix.3_1451_WT	id_uc002eiy.3_2687_WT	id_uc002eiy.3_2687
ATGGGGTTCGGTATGCGCCAGCAGGGCATCTTGGAAAAGGAACTCTTGGTTCGATACCTGGAGCAGAGGAGGGGAAAGTCCAGAAAATCCTAAGGCTCCCCGAGACGAT	WT	IdentifiedTRUB1	id_uc002eix.3_1451_WT	id_uc002eiy.3_2687_WT	id_uc002eiy.3_2687
ATGGGGTTCGGTATGCGCCAGCAGGGCATCTTGGAAAAGGAACTCTTGGTTCGATACCTGGAGCAGAGGAGGGGAAAGTCCAGTCGACTGAAAGGCTCCCCGAGACGAT	WT	TwoExp	id_uc002eix.3_1451_WT	id_uc002eix.3_1451_WT	id_uc002eix.3_1451
ATGGGGTTCGGTATGCGCCAGCAGGGCATCTTGGAAAAGGAACTCTTGGTTCGATACCTGGAGCAGAGGAGGGGAAAGTCCAGTCGACTGAAAGGCTCCCCGAGACGAT	WT	IdentifiedTRUB1	id_uc002eix.3_1451_WT	id_uc002eix.3_1451_WT	id_uc002eix.3_1451
ATGGGGTTCGGTATGCGCTGCAGGGCAAACGGGGCATTGAGAAGCCCCCCTTCGAGCTGCCAGACTTCATCAAACGCACAGGCTTTGGCCGAAGGCTCCCCGAGACGAT	WT	TwoExp	id_uc001ogy.1_1605_WT	id_uc001ogy.1_1605_WT	id_uc001ogy.1_1605
ATGGGGTTCGGTATGCGCCTCTGGGCCCATTTCTGCTGTTTCTGCTCAGTTCAACCCTGATGGCTTCCTTTATGGGTGACACTTACATCGGAAGGCTCCCCGAGACGAT	WT	PredictedTRUB1	id_uc002mmn.2_763_WT	id_uc002mmn.2_763_WT	id_uc002mmn.2_763
ATGGGGTTCGGTATGCGCTAAAAGGAAGGAAGTCTTCTTAGGGATCCAGTTCAAAGCTATTTGGGGGCATCAAACTGAAACTCCGCCACTGAAGGCTCCCCGAGACGAT	WT	PredictedTRUB1	id_uc001bld.4_2945_WT	id_uc001bld.4_2945_WT	id_uc001bld.4_2945
ATGGGGTTCGGTATGCGCGCTATGCCGTGCGCCGTAGCCTGGGACTCCAGTATCTCCCCGATGCAGTGAAGGGCCTTCCACTGAGGCACGCAAGGCTCCCCGAGACGAT	WT	Pus1	id_uc001rrh.3_966_WT	id_uc001rrh.3_966_WT	id_uc001rrh.3_966
ATGGGGTTCGGTATGCGCGCAGGTGCTGGAGAACCTTGAATCTAAGAGGTTCCAGCTGGTGGATTCAAGGTCTCAAGGGCGGTTACTTATTAAGGCTCCCCGAGACGAT	WT	Pus1	id_uc003aqh.3_603_WT	id_uc003aqh.3_603_WT	id_uc003aqh.3_603
ATGGGGTTCGGTATGCGCAGGCTCCCAGTGGGCAGCCCTGGCCTCTTCCTTAACGCTGGCCCCGGTCCAGGGCCGGCCCCTGTCAGACTGCAAGGCTCCCCGAGACGAT	WT	TwoExp	id_uc002mps.2_2932_WT	id_uc002mps.2_2932_WT	id_uc002mps.2_2932
ATGGGGTTCGGTATGCGCGCTTCACAGAAGAAAAGCCTGGTTCATAAAACTTTGCCTGATGTTCTAGCAGAACCTTTATCAAGTTGATATTAAGGCTCCCCGAGACGAT	WT	TwoExp	id_uc002txc.3_500_WT	id_uc002txc.3_500_WT	id_uc002txc.3_500
ATGGGGTTCGGTATGCGCCCCGCTCTTTGCCGGCATCGACTGTGAGGTGTTCGAGTCACGCTTCCCCACCACCATGGCCTTGTCTCGCCCAAAGGCTCCCCGAGACGAT	WT	PredictedTRUB1	id_uc002fwx.2_2846_WT	id_uc002fwx.2_2846_WT	id_uc002fwx.2_2846
ATGGGGTTCGGTATGCGCCGTCCCCCCTCCCAGGACTGGTCTGTTGTCTTTTCATCTGTTCAAGAGGAGATTGAAACTGAAAAATAATCACAAGGCTCCCCGAGACGAT	WT	TwoExp	id_uc002mer.4_2890_WT	id_uc002mer.4_2890_WT	id_uc002mer.4_2890
ATGGGGTTCGGTATGCGCTGAGCATCCCGGGTCACTGGATCCTGCTGCTGTAATGGGAACCCCTCCCCCATTTACTTCTCCACCCTTCAGGAAGGCTCCCCGAGACGAT	WT	Pus1	id_uc002pyp.3_2364_WT	id_uc002pyp.3_2364_WT	id_uc002pyp.3_2364
ATGGGGTTCGGTATGCGCTGTTCTGAATCGGTCTCCAGAAATGCTTTGGGTTCATCTTTCATTGCTGCAAGGAACTTCCATGCCGATGTCTAAGGCTCCCCGAGACGAT	WT	TwoExp	id_uc010dnl.1_466_WT	id_uc010dnl.1_466_WT	id_uc010dnl.1_466
ATGGGGTTCGGTATGCGCCAAAAGTGAACTATATCTTCAAGACACTGTCTTTTTGGGGCCAGGTCTTTTGTTTTTAGACCAGTCGCACACTAAGGCTCCCCGAGACGAT	WT	TwoExp	id_uc001tin.3_1210_WT	id_uc001tin.3_1210_WT	id_uc001tin.3_1210
ATGGGGTTCGGTATGCGCAGCCCGAGCCCAGCACATTGTGCCCTGTACTATATCTCAGCTGCTTTCTGCCACTTTGGTTGATGTATATGAGAAGGCTCCCCGAGACGAT	WT	TwoExp	id_uc001bpe.1_435_WT	id_uc001bpe.1_435_WT	id_uc001bpe.1_435
ATGGGGTTCGGTATGCGCGTCATCTATGTGGGAAAGCCTTCAGTAAAAGTTCTAACCTTAGACGACATGAGATGATTCACACTGCGTGAAGAAGGCTCCCCGAGACGAT	WT	PredictedTRUB1	id_uc003wot.3_1079_WT	id_uc003wot.3_1079_WT	id_uc003wot.3_1079
ATGGGGTTCGGTATGCGCATTCTAGTGCTCATTATTCATTATTGTTTATTTTCATTGTGCTGATTTTTGGTGATCAAGCCTCATTGGTATCAAGGCTCCCCGAGACGAT	WT	TwoExp	id_uc001fvw.3_605_WT	id_uc001fvw.3_605_WT	id_uc001fvw.3_605
ATGGGGTTCGGTATGCGCAAAGATGAAGAGGAGACTGTGACGACAAAGCATATTCATATCACACAGGCCACAGAGACCACCACAAATCTTAAAGGCTCCCCGAGACGAT	WT	TwoExp	id_uc011ddv.2_989_WT	id_uc011ddv.2_989_WT	id_uc011ddv.2_989
ATGGGGTTCGGTATGCGCACTATGCTTTCCTTCTTTGGGATAGAGAATGTTCCAGACATTCTCGCTTCCCTGAAAGACTGAAGAGTGGCCCAAGGCTCCCCGAGACGAT	WT	PredictedTRUB1	id_uc002liz.4_1662_WT	id_uc002liz.4_1662_WT	id_uc002liz.4_1662
ATGGGGTTCGGTATGCGCTAACTTTTACTTGCTTTTTCCAGAGTTATTTATACCAAATCCTACAGGGGATTGTGTTTTGTCACGTTCCCAGAAGGCTCCCCGAGACGAT	WT	TwoExp	id_uc010qii.2_2755_WT	id_uc010qii.2_2755_WT	id_uc010qii.2_2755
ATGGGGTTCGGTATGCGCTTGCTGTTGCTGAGCCTCAAATCGCAATGTTTTGTGGGAAGTTAAATATGCATGTGAACATTCAGTTCTAAGTAAGGCTCCCCGAGACGAT	WT	TwoExp	id_uc021qsg.1_242_WT	id_uc021qsg.1_242_WT	id_uc021qsg.1_242
ATGGGGTTCGGTATGCGCACGGGAAAAAGCTGCCAACAGCTTGGAAGCATTCATATTTGAGACCCAGGACAAGCTGTACCAGCAGGTTACGAAGGCTCCCCGAGACGAT	WT	TwoExp	id_uc001pux.3_2307_WT	id_uc010ryw.2_2504_WT	id_uc010ryw.2_2504
ATGGGGTTCGGTATGCGCACGGGAAAAAGCTGCCAACAGCTTGGAAGCATTCATATTTGAGACCCAGGACAAGCTGTACCAGCAGGTTACGAAGGCTCCCCGAGACGAT	WT	Dkc1	id_uc001pux.3_2307_WT	id_uc010ryw.2_2504_WT	id_uc010ryw.2_2504
ATGGGGTTCGGTATGCGCACGGGAAAAAGCTGCCAACAGCTTGGAAGCATTCATATTTGAGACCCAGGACAAGCTGTACCAGCTGCTTTGTAAGGCTCCCCGAGACGAT	WT	TwoExp	id_uc001pux.3_2307_WT	id_uc001pux.3_2307_WT	id_uc001pux.3_2307
ATGGGGTTCGGTATGCGCACGGGAAAAAGCTGCCAACAGCTTGGAAGCATTCATATTTGAGACCCAGGACAAGCTGTACCAGCTGCTTTGTAAGGCTCCCCGAGACGAT	WT	Dkc1	id_uc001pux.3_2307_WT	id_uc001pux.3_2307_WT	id_uc001pux.3_2307
ATGGGGTTCGGTATGCGCAGCGCCTGTCTAGTAAACAGGAGATCCTGGGTTCGAATCCCAGCGGTGCCTTTATTCAATTGAAATCTCCCTGAAGGCTCCCCGAGACGAT	WT	PredictedTRUB1	id_uc002gkq.4_5641_WT	id_uc002gkq.4_5641_WT	id_uc002gkq.4_5641
ATGGGGTTCGGTATGCGCAATGGCAGTTGGCAATTACGCTGCTTCTCAGTTCCATCCTGTGTTGCCCCAGGTTTACTTCATGGCGTGAAATAAGGCTCCCCGAGACGAT	WT	PredictedTRUB1	id_uc003iir.1_1365_WT	id_uc003iir.1_1365_WT	id_uc003iir.1_1365
ATGGGGTTCGGTATGCGCCAACAAGCGGTTCCAGTGTCCGGAGGCGCTGTTCCAGCCTTCCTTCCTGGGTATGGAATCTTGCGCGTAGCCAAAGGCTCCCCGAGACGAT	WT	TwoExp	id_uc021oju.1_1581_WT	id_uc021oju.1_1581_WT	id_uc021oju.1_1581
ATGGGGTTCGGTATGCGCTCCACCAGACACAGCTCGGGCCTGTGTAATTGTAGGAGAAGACACTCAGCAGTGATTGCCATGGCTCGCGAGCAAGGCTCCCCGAGACGAT	WT	TwoExp	id_uc003wzj.3_2309_WT	id_uc003wzj.3_2309_WT	id_uc003wzj.3_2309
ATGGGGTTCGGTATGCGCGTCTGAGGATCTGACTTGGGTCTTGGAAGGGTTCCAACCCCAAGTCAGTCAGGAAGCTGCCCATTCATATCTCAAGGCTCCCCGAGACGAT	WT	PredictedTRUB1	id_uc001saw.3_2884_WT	id_uc001saw.3_2884_WT	id_uc001saw.3_2884
ATGGGGTTCGGTATGCGCTAGATGATGTTCCAAAGGAAAATTCCTCAGGTTCCAGTCCTTTGGATCAAGTTGATTCTTCTTTAGGCCGGGCAAGGCTCCCCGAGACGAT	WT	IdentifiedTRUB1	id_uc003kos.4_456_WT	id_uc003kos.4_456_WT	id_uc003kos.4_456
ATGGGGTTCGGTATGCGCTAGATGATGTTCCAAAGGAAAATTCCTCAGGTTCCAGTCCTTTGGATCAAGTTGATTCTTCTTTAGGCCGGGCAAGGCTCCCCGAGACGAT	WT	TwoExp	id_uc003kos.4_456_WT	id_uc003kos.4_456_WT	id_uc003kos.4_456
ATGGGGTTCGGTATGCGCTAGATGATGTTCCAAAGGAAAATTCCTCAGGTTCCAGTCCTTTGGATCAAGTTGATTCTTCTTTAGTGGTCATAAGGCTCCCCGAGACGAT	WT	IdentifiedTRUB1	id_uc003kos.4_456_WT	id_uc003kos.4_456_WT	id_uc003kos.4_456
ATGGGGTTCGGTATGCGCTAGATGATGTTCCAAAGGAAAATTCCTCAGGTTCCAGTCCTTTGGATCAAGTTGATTCTTCTTTAGTGGTCATAAGGCTCCCCGAGACGAT	WT	TwoExp	id_uc003kos.4_456_WT	id_uc003kos.4_456_WT	id_uc003kos.4_456
ATGGGGTTCGGTATGCGCGCCGGTTTCTGCGTGCTGCGTGCGCGGCCGCGTGGGCTATGGGGCGGCGGTCGCGGGGTCGGCGGTCGCTTAGAAGGCTCCCCGAGACGAT	WT	Dkc1	id_uc003jdu.3_377_WT	id_uc003jdu.3_377_WT	id_uc003jdu.3_377
ATGGGGTTCGGTATGCGCCCTGGGCTGCAATGTCTCACCAGTGCCTGGGTTCCAGCCCCAAGACGAGAGTCTGGTGTATTTGTAACTTAAGAAGGCTCCCCGAGACGAT	WT	PredictedTRUB1	id_uc002dcv.3_840_WT	id_uc002dcv.3_840_WT	id_uc002dcv.3_840
ATGGGGTTCGGTATGCGCCCTGGGCTGCAATGTCTCACCAGTGCCTGGGTTCCAGCCCCAAGACGAGAGTCTGGTGTATTTGTAACTTAAGAAGGCTCCCCGAGACGAT	WT	TwoExp	id_uc002dcv.3_840_WT	id_uc002dcv.3_840_WT	id_uc002dcv.3_840
ATGGGGTTCGGTATGCGCCCTGGGCTGCAATGTCTCACCAGTGCCTGGGTTCCAGCCCCAAGACGAGAGTCTGGTGTATTTGTAACTTAAGAAGGCTCCCCGAGACGAT	WT	TwoExp	id_uc002dcv.3_840_WT	id_uc002dcv.3_840_WT	id_uc002dcv.3_840
ATGGGGTTCGGTATGCGCCCTGGGCTGCAATGTCTCACCAGTGCCTGGGTTCCAGCCCCAAGACGAGAGTCTGGTGTATTTGTAACTTAAGAAGGCTCCCCGAGACGAT	WT	TwoExp	id_uc002dcv.3_840_WT	id_uc002dcv.3_840_WT	id_uc002dcv.3_840
ATGGGGTTCGGTATGCGCCCTGGGCTGCAATGTCTCACCAGTGCCTGGGTTCCAGCCCCAAGACGAGAGTCTGGTGTATTTGTTCGGGTCAAAGGCTCCCCGAGACGAT	WT	PredictedTRUB1	id_uc002dcv.3_840_WT	id_uc002dcv.3_840_WT	id_uc002dcv.3_840
ATGGGGTTCGGTATGCGCCCTGGGCTGCAATGTCTCACCAGTGCCTGGGTTCCAGCCCCAAGACGAGAGTCTGGTGTATTTGTTCGGGTCAAAGGCTCCCCGAGACGAT	WT	TwoExp	id_uc002dcv.3_840_WT	id_uc002dcv.3_840_WT	id_uc002dcv.3_840
ATGGGGTTCGGTATGCGCCCTGGGCTGCAATGTCTCACCAGTGCCTGGGTTCCAGCCCCAAGACGAGAGTCTGGTGTATTTGTTCGGGTCAAAGGCTCCCCGAGACGAT	WT	TwoExp	id_uc002dcv.3_840_WT	id_uc002dcv.3_840_WT	id_uc002dcv.3_840
ATGGGGTTCGGTATGCGCCCTGGGCTGCAATGTCTCACCAGTGCCTGGGTTCCAGCCCCAAGACGAGAGTCTGGTGTATTTGTTCGGGTCAAAGGCTCCCCGAGACGAT	WT	TwoExp	id_uc002dcv.3_840_WT	id_uc002dcv.3_840_WT	id_uc002dcv.3_840
ATGGGGTTCGGTATGCGCCCTGGGCTGCAATGTCTCACCAGTGCCTGGGTTCCAGCCCCAAGACGAGAGTCTGGTGTATTTGTTAACACAAAAGGCTCCCCGAGACGAT	WT	PredictedTRUB1	id_uc002dcv.3_840_WT	id_uc002dfe.3_846_WT	id_uc002dfe.3_846
ATGGGGTTCGGTATGCGCCCTGGGCTGCAATGTCTCACCAGTGCCTGGGTTCCAGCCCCAAGACGAGAGTCTGGTGTATTTGTTAACACAAAAGGCTCCCCGAGACGAT	WT	TwoExp	id_uc002dcv.3_840_WT	id_uc002dfe.3_846_WT	id_uc002dfe.3_846
ATGGGGTTCGGTATGCGCCCTGGGCTGCAATGTCTCACCAGTGCCTGGGTTCCAGCCCCAAGACGAGAGTCTGGTGTATTTGTTAACACAAAAGGCTCCCCGAGACGAT	WT	TwoExp	id_uc002dcv.3_840_WT	id_uc002dfe.3_846_WT	id_uc002dfe.3_846
ATGGGGTTCGGTATGCGCCCTGGGCTGCAATGTCTCACCAGTGCCTGGGTTCCAGCCCCAAGACGAGAGTCTGGTGTATTTGTTAACACAAAAGGCTCCCCGAGACGAT	WT	TwoExp	id_uc002dcv.3_840_WT	id_uc002dfe.3_846_WT	id_uc002dfe.3_846
ATGGGGTTCGGTATGCGCCCTGGGCTGCAATGTCTCACCAGTGCCTGGGTTCCAGCCCCAAGACGAGAGTCTGGTGTATTTGTTCCCTTGGAAGGCTCCCCGAGACGAT	WT	PredictedTRUB1	id_uc002dcv.3_840_WT	id_uc002deq.3_909_WT	id_uc002deq.3_909
ATGGGGTTCGGTATGCGCCCTGGGCTGCAATGTCTCACCAGTGCCTGGGTTCCAGCCCCAAGACGAGAGTCTGGTGTATTTGTTCCCTTGGAAGGCTCCCCGAGACGAT	WT	TwoExp	id_uc002dcv.3_840_WT	id_uc002deq.3_909_WT	id_uc002deq.3_909
ATGGGGTTCGGTATGCGCCCTGGGCTGCAATGTCTCACCAGTGCCTGGGTTCCAGCCCCAAGACGAGAGTCTGGTGTATTTGTTCCCTTGGAAGGCTCCCCGAGACGAT	WT	TwoExp	id_uc002dcv.3_840_WT	id_uc002deq.3_909_WT	id_uc002deq.3_909
ATGGGGTTCGGTATGCGCCCTGGGCTGCAATGTCTCACCAGTGCCTGGGTTCCAGCCCCAAGACGAGAGTCTGGTGTATTTGTTCCCTTGGAAGGCTCCCCGAGACGAT	WT	TwoExp	id_uc002dcv.3_840_WT	id_uc002deq.3_909_WT	id_uc002deq.3_909
ATGGGGTTCGGTATGCGCGGATGCATCTGTATATTTACAAAGAGAAGTTTTTTTGGGCACATTAAATGATCGCACGAATGCAATTCAGGATAAGGCTCCCCGAGACGAT	WT	TwoExp	id_uc001vmt.3_2144_WT	id_uc001vmt.3_2144_WT	id_uc001vmt.3_2144
ATGGGGTTCGGTATGCGCTTGTGTGAGCGTGTGGACAGTGGTGGCCGCGCTGTGCCTGCTCGTGTTGCCTACATGTCCCTGGCTCATCCTAAAGGCTCCCCGAGACGAT	WT	TwoExp	id_uc001jsm.3_2457_WT	id_uc001jsm.3_2457_WT	id_uc001jsm.3_2457
ATGGGGTTCGGTATGCGCGAAAGCTTAACTGCTGTGGTTTAAAGTACAGTTTCTCTAAAGATCAGACATGGCACTGTCTCCTCTAGCTGCTAAGGCTCCCCGAGACGAT	WT	TwoExp	id_uc003uih.3_2947_WT	id_uc003uih.3_2947_WT	id_uc003uih.3_2947
ATGGGGTTCGGTATGCGCCGCCAATGCTGGGGAACGGAAAATGAGGGAGTTCAACTCTGGCCCTCACAATCCAGTGGAGGAGACCGCGGTCAAGGCTCCCCGAGACGAT	WT	PredictedTRUB1	id_uc001hzq.2_462_WT	id_uc001hzq.2_462_WT	id_uc001hzq.2_462
ATGGGGTTCGGTATGCGCAGAGGGTGGTGCAGTTGAATCCTTGGCCTGAATATATTTACACACGTCTTGAGATGTATAATATATCCTGGCTAAGGCTCCCCGAGACGAT	WT	TwoExp	id_uc010iup.1_574_WT	id_uc010iup.1_574_WT	id_uc010iup.1_574
ATGGGGTTCGGTATGCGCTTGACTTACCACCCTACAAAAGATGGCATGAATTGATGCTTGACAAGGCACCAGTGCTAAAGGTTCAGAGCGGAAGGCTCCCCGAGACGAT	WT	TwoExp	id_uc003wyl.2_506_WT	id_uc003wyl.2_506_WT	id_uc003wyl.2_506
ATGGGGTTCGGTATGCGCAAATGAGTTTTGACCCATTGTGTCCTGTTAGCTTCCTCGGTTATGTGGACATGCTTGGTGTAGCCATAGGACTAAGGCTCCCCGAGACGAT	WT	TwoExp	id_uc010pda.2_695_WT	id_uc010pda.2_695_WT	id_uc010pda.2_695
ATGGGGTTCGGTATGCGCGTTCTAGGCGCTTCGGGAGCCGCGGCTTATGGTGCAGACATGGCCAAGTCCAAGAACCACACCACTCAGCTATAAGGCTCCCCGAGACGAT	WT	TwoExp	id_uc003dcs.3_89_WT	id_uc003dcs.3_89_WT	id_uc003dcs.3_89
ATGGGGTTCGGTATGCGCTGGCTTCACCCTCTGATACCAACTGATTATATTAAAAACTTACCAATGTGGCGATTTAAATGTCTAGGTACTCAAGGCTCCCCGAGACGAT	WT	TwoExp	id_uc021vkg.1_1531_WT	id_uc021vkg.1_1531_WT	id_uc021vkg.1_1531
ATGGGGTTCGGTATGCGCCTAGCAGAGGAGCAGTTTATCCTTTCCCAGGTTGCACTCCTGGAGCAGGTGAATGCCTTGGTGCCCGCCGCTAAAGGCTCCCCGAGACGAT	WT	TwoExp	id_uc003zux.1_330_WT	id_uc003zux.1_330_WT	id_uc003zux.1_330
ATGGGGTTCGGTATGCGCCCTTGCCGCAGCACAATCCCGTGGACAGAGCTTACTCCATCTAACTCGTTTTCAAGTGCATGATTGCGACCATAAGGCTCCCCGAGACGAT	WT	TwoExp	id_uc001lxc.3_1439_WT	id_uc001lxc.3_1439_WT	id_uc001lxc.3_1439
ATGGGGTTCGGTATGCGCTTGTAAAATACACAGATTGAAATCATGGCAGGTCCAGAAAGTGATGCGCAATACCAGTTCACTGGCGTAGTCCAAGGCTCCCCGAGACGAT	WT	TwoExp	id_uc001kww.2_320_WT	id_uc001kww.2_320_WT	id_uc001kww.2_320
ATGGGGTTCGGTATGCGCCAGTGATCTCACTTAAATCTATATACAAAGCCTTGGTCCCGTGAAAACACTCGTGTGCCCACCAGCTCCTCAAAAGGCTCCCCGAGACGAT	WT	Dkc1	id_uc003gfo.3_3014_WT	id_uc003gfo.3_3014_WT	id_uc003gfo.3_3014
ATGGGGTTCGGTATGCGCCCCGCCGCTAAGCTGAGAAGGGAGAGCGAGCTTAGGACCGCCTGCCCGGGGCAACCCCGAACCAATAATTGGCAAGGCTCCCCGAGACGAT	WT	TwoExp	id_uc001nsg.3_325_WT	id_uc001nsg.3_325_WT	id_uc001nsg.3_325
ATGGGGTTCGGTATGCGCGAAGCAGAATCACTTATGTGAAAGGAGACCTTTTTGCATGCCCGAAAACAGACTCTTTAGCCCACTTTGTCGCAAGGCTCCCCGAGACGAT	WT	TwoExp	id_uc003opm.3_237_WT	id_uc003opm.3_237_WT	id_uc003opm.3_237
ATGGGGTTCGGTATGCGCGAGCTAAGCAGTTTCTCTGGAAACCCCCCTGGTAAGTGTGGAGGAGGCGGGACACTCTGACCCAACAACGTCGAAGGCTCCCCGAGACGAT	WT	TwoExp	id_uc002imz.4_163_WT	id_uc002imz.4_163_WT	id_uc002imz.4_163
ATGGGGTTCGGTATGCGCCCTTGACTGTGTCTCTTTCCTTCTAGGCGGCTTATGACCCCTACGCTTATCCCAGCGACTATGATCTTTGCGTAAGGCTCCCCGAGACGAT	WT	TwoExp	id_uc003aug.3_542_WT	id_uc003aug.3_542_WT	id_uc003aug.3_542
ATGGGGTTCGGTATGCGCGGAGAGGGGAGTGGGCTGGTTCTTCCCACCACTTCCCAGGCTCTGACAGCCGAGACTCATTTCCAAACGGGTGAAGGCTCCCCGAGACGAT	WT	TwoExp	id_uc002xrq.3_1689_WT	id_uc002xrq.3_1689_WT	id_uc002xrq.3_1689
ATGGGGTTCGGTATGCGCCTGGCAGCGCGGAGGCCGCACGATGCCTGGAGTTACTGTAAAAGACGTGAACCAGCAGGAGTTCGCAACAGATAAGGCTCCCCGAGACGAT	WT	TwoExp	id_uc002ort.3_384_WT	id_uc002ort.3_384_WT	id_uc002ort.3_384
ATGGGGTTCGGTATGCGCGGATTCGGCGCTTTCACCGCCGCGGCCCGGGTTCGATTCCCGGTCAGGGAATTGTTTTACACTGGGATCTGGGAAGGCTCCCCGAGACGAT	WT	PredictedTRUB1	id_uc021ogr.1_354_WT	id_uc021ogr.1_354_WT	id_uc021ogr.1_354
ATGGGGTTCGGTATGCGCATTTTCAGAGAATCATAAAAATGATATGGATATTACCCAGAGTTGTATGGTGGAAATAGATAACGCAGTGATCAAGGCTCCCCGAGACGAT	WT	Pus1	id_uc010bbt.1_3425_WT	id_uc010bbt.1_3425_WT	id_uc010bbt.1_3425
ATGGGGTTCGGTATGCGCATTGCCAGATGCGACTGTGCGCCTCGCTGGGCTGATCAGCTGACCGAAGAACAGATTGCTGAATTAATATCTTAAGGCTCCCCGAGACGAT	WT	CTGsites	id_uc001xym.2_228_WT	id_uc001xym.2_228_WT	id_uc001xym.2_228
ATGGGGTTCGGTATGCGCATTGCCAGATGCGACTGTGCGCCTCGCTGGGCTGATCAGCTGACCGAAGAACAGATTGCTGAATTACGGGGGTAAGGCTCCCCGAGACGAT	WT	CTGsites	id_uc001xym.2_228_WT	id_uc001xym.2_228_WT	id_uc001xym.2_228
ATGGGGTTCGGTATGCGCTATTTAAAGTGATTTATATTTGAGTAAAAAGTTCAATTCTTTTTTGCTTTTTAAAAAATCTGATGTTGGAGTCAAGGCTCCCCGAGACGAT	WT	PredictedTRUB1	id_uc001unr.4_5140_WT	id_uc001unr.4_5140_WT	id_uc001unr.4_5140
ATGGGGTTCGGTATGCGCGAGAGTTCATCCCGTTCTTAAACTGGACCCTGTACACGTATCCTGAAAACTGGAGGGCCTTCAAGGATAGATAAAGGCTCCCCGAGACGAT	WT	TwoExp	id_uc010rlw.1_261_WT	id_uc010rlw.1_261_WT	id_uc010rlw.1_261
ATGGGGTTCGGTATGCGCCCACCATTTCCAGGTCAACAGGACTAGAGCGTTGATGGTTTTCAAACCCTGTTGGAAGAAAGTGCTACAAGAGAAGGCTCCCCGAGACGAT	WT	TwoExp	id_uc001rwb.1_464_WT	id_uc001rwb.1_464_WT	id_uc001rwb.1_464
ATGGGGTTCGGTATGCGCGAGACCCCACTCAGAGAATGGGGCTGACACTGTAGGAGAAATATAAGCAGGACTCCTGCTGGCTGAGTTTGACAAGGCTCCCCGAGACGAT	WT	TwoExp	id_uc022bon.1_709_WT	id_uc022bon.1_709_WT	id_uc022bon.1_709
ATGGGGTTCGGTATGCGCTCTGGCGGCAGCCATCAGTTTGATTTCACAGGTAAGCCAAGATGGGTGCATACAAGTACATCCAGAATTTACGAAGGCTCCCCGAGACGAT	WT	Dkc1	id_uc003ccr.3_386_WT	id_uc003ccr.3_386_WT	id_uc003ccr.3_386
ATGGGGTTCGGTATGCGCGGACCTCTGGATGTTCCCGAGTATCCTGATGTTCCACCCAGAAGCCGCCAGGGCCATCCTGGAGTACAATAGCAAGGCTCCCCGAGACGAT	WT	PredictedTRUB1	id_uc001lor.4_1008_WT	id_uc001lor.4_1008_WT	id_uc001lor.4_1008
ATGGGGTTCGGTATGCGCCAGAGGCGCTAAAGAGGAGCACGGTGGACTGATTCGTTCCCCCCGCCACGAGAAGAAGAAGAAGGGATGTGCAAAGGCTCCCCGAGACGAT	WT	TwoExp	id_uc002qlu.3_1286_WT	id_uc002qlu.3_1286_WT	id_uc002qlu.3_1286
ATGGGGTTCGGTATGCGCCCAGCTAGAACACAGCAGGGCTGGGACTGGGTTCCAGCCCCACGTGGAGTCTGGATTTGTTTTGTGCCGCTACAAGGCTCCCCGAGACGAT	WT	PredictedTRUB1	id_uc003xhl.3_695_WT	id_uc003xhl.3_695_WT	id_uc003xhl.3_695
ATGGGGTTCGGTATGCGCGGGAAGTGGAATGCTTCGATGCAGGCCAGAGTTCAAGGCTCTGGGGCTGGCCTCACAAGAGGCTTTGTTGCACAAGGCTCCCCGAGACGAT	WT	PredictedTRUB1	id_uc021pmu.1_3527_WT	id_uc021pmu.1_3527_WT	id_uc021pmu.1_3527
ATGGGGTTCGGTATGCGCGTGGTTCCGGAGGCCGGCTGGCAGGGCTGGGTTCAAGCCCCAACATCCACACCAGTGTTGTTCACGTTGGTCAAAGGCTCCCCGAGACGAT	WT	PredictedTRUB1	id_uc010ibz.3_2708_WT	id_uc010ibz.3_2708_WT	id_uc010ibz.3_2708
ATGGGGTTCGGTATGCGCTCGACCTGAGCCCCTTCCTCTTTACCCGCTTTTACTTGGGAGAGAAGATCCAGGAGAACAACATCCGCTCGGTAAGGCTCCCCGAGACGAT	WT	TwoExp	id_uc001qdi.3_1591_WT	id_uc001qdi.3_1591_WT	id_uc001qdi.3_1591
ATGGGGTTCGGTATGCGCATTCGAGCGAAATATCCCGACAGGGTTCCGCCTAACTATGGGACAGCTTTACGAGAAGGAAAAAGTAATTGCCAAGGCTCCCCGAGACGAT	WT	TwoExp	id_uc010cgy.3_230_WT	id_uc010cgy.3_230_WT	id_uc010cgy.3_230
ATGGGGTTCGGTATGCGCAAAGAAGGGTAGAAGTTCTAATGTCTGTTAGCTACCCATAAGAATGCTGTTTGCTGCAGTTCTGTCTAATTGCAAGGCTCCCCGAGACGAT	WT	TwoExp	id_uc010znu.2_2561_WT	id_uc010znu.2_2561_WT	id_uc010znu.2_2561
ATGGGGTTCGGTATGCGCGCACCAACAGACCTGTCTATGCTTTTGACCTATTGGGTTTTGGACGAAGTAGTAGACCCAGGTTTATACTGTAAAGGCTCCCCGAGACGAT	WT	Pus1	id_uc003cmx.3_439_WT	id_uc003cmx.3_439_WT	id_uc003cmx.3_439
ATGGGGTTCGGTATGCGCGACATGTGCTTGGGCACTGGTGGGCCTGGGCTTCTGAGGTGGCCTCCTGCCCTGATCAGGGACCCCGTAGTTAAAGGCTCCCCGAGACGAT	WT	TwoExp	id_uc001jsm.3_2073_WT	id_uc001jsm.3_2073_WT	id_uc001jsm.3_2073
ATGGGGTTCGGTATGCGCAAGGGAGCTGCTGTTGACGGAGGCAAGTTGGATGTCGGGAATGCTGAGGTGAAGTTGGAGGAAGATGTATAAAAAGGCTCCCCGAGACGAT	WT	TwoExp	id_uc004fid.2_1139_WT	id_uc004fid.2_1139_WT	id_uc004fid.2_1139
ATGGGGTTCGGTATGCGCCACCCTAGAGCCAAGGTGACGCTGAATGGGGTTCCAGCCCAGCCACTGGGCCCGAGGGCCCAGCTACACACACAAGGCTCCCCGAGACGAT	WT	PredictedTRUB1	id_uc002mnq.2_1355_WT	id_uc002mnq.2_1355_WT	id_uc002mnq.2_1355
ATGGGGTTCGGTATGCGCGGAAAAGCTAATTGGTATTTTTTATTGGCACGTTCTGATCCAGATCCTAAAGCTCCTGCTAATAAAGAGAATCAAGGCTCCCCGAGACGAT	WT	TwoExp	id_uc009wbp.3_1061_WT	id_uc009wbp.3_1061_WT	id_uc009wbp.3_1061
ATGGGGTTCGGTATGCGCGTGTTCAATGTAGACAATGCAAAATTTGTAGTTAAATTTGACCTCAGTGCCCTGACTACAATTGGGCGGACGTAAGGCTCCCCGAGACGAT	WT	TwoExp	id_uc010bxf.3_2223_WT	id_uc010bxf.3_2223_WT	id_uc010bxf.3_2223
ATGGGGTTCGGTATGCGCGAGGATGGCGGACGCCGGCATTCGCCGCGTGGTTCCCAGCGACCTGTATCCCCTCGTGCTCGGCTTGATAGTTAAGGCTCCCCGAGACGAT	WT	TwoExp	id_uc001kuo.2_265_WT	id_uc001kuo.2_265_WT	id_uc001kuo.2_265
ATGGGGTTCGGTATGCGCGCATGACCAGTGTCAGCGGAAGCAGTGGCGGGTGGATCTGCCGGCCACCAGCGTGGTGATCACGTTCCATTCGAAGGCTCCCCGAGACGAT	WT	TwoExp	id_uc010pwa.1_471_WT	id_uc010pwa.1_471_WT	id_uc010pwa.1_471
ATGGGGTTCGGTATGCGCATGGATGTCAAGCTGGATCCTGCCCTCCAGGATAAGTGCCTGATTGATCTGGGAAAATGGTGCAGCCAGCAAGAAGGCTCCCCGAGACGAT	WT	TwoExp	id_uc002fcx.3_1962_WT	id_uc002fcx.3_1962_WT	id_uc002fcx.3_1962
ATGGGGTTCGGTATGCGCCGCTTCCGCCCACCGAGATGGCGGCCCAGGATTTCTTCCAGCGCTGGAAGCAGCTGAGCCTCCCTGAACGACGAAGGCTCCCCGAGACGAT	WT	TwoExp	id_uc010enk.3_150_WT	id_uc010enk.3_150_WT	id_uc010enk.3_150
ATGGGGTTCGGTATGCGCACTGCCCCAGAAATTGCAGTTCCTGAGCTGGATGGAAAGACAGCAAAGATGTACAGGGGTGGCAATATTATTAAAGGCTCCCCGAGACGAT	WT	Dkc1	id_uc001fyd.4_564_WT	id_uc001fyd.4_564_WT	id_uc001fyd.4_564
ATGGGGTTCGGTATGCGCGTGTGACTGATAGAGCGTTGCTATTTCATTTTTTTAAGACAAAATGAAAGCAAAATATAGAGTTCCGTGTATAAAGGCTCCCCGAGACGAT	WT	TwoExp	id_uc002ivi.3_1860_WT	id_uc002ivi.3_1860_WT	id_uc002ivi.3_1860
ATGGGGTTCGGTATGCGCACAAGTGTTAGGACTTGTCACAGATTTCTAACTCTGCCGCATAAACTATAAATCTGTAAGGTGGTTACTCTAGAAGGCTCCCCGAGACGAT	WT	TwoExp	id_uc003pqk.3_7349_WT	id_uc003pqk.3_7349_WT	id_uc003pqk.3_7349
ATGGGGTTCGGTATGCGCCACGAGGACGAGAAGAAGGGAGCCGGAGGAGCTGGTCGCTGTCGGCTAAGCAAGATTGGAGCTACGGAATAATAAGGCTCCCCGAGACGAT	WT	CTGsites	id_uc010vdw.1_260_WT	id_uc010vdw.1_260_WT	id_uc010vdw.1_260
ATGGGGTTCGGTATGCGCCACGAGGACGAGAAGAAGGGAGCCGGAGGAGCTGGTCGCTGTCGGCTAAGCAAGATTGGAGCTACCGTCAGTCAAGGCTCCCCGAGACGAT	WT	CTGsites	id_uc010vdw.1_260_WT	id_uc010vdw.1_260_WT	id_uc010vdw.1_260
ATGGGGTTCGGTATGCGCCCGGCTGGACATGGAGATCGATGGGCAGAAGCTGCGAGACGCCTTCACCTGGAACATGAATGAGACACCACTTAAGGCTCCCCGAGACGAT	WT	Pus1	id_uc002zyb.3_807_WT	id_uc002zyb.3_807_WT	id_uc002zyb.3_807
ATGGGGTTCGGTATGCGCGTCTCTGAACCGCACCACGCAGTGGGAGTGGTTCCACCCCAAGCTGGACACGCTGCGGGACGACCGTTCTACAAAGGCTCCCCGAGACGAT	WT	PredictedTRUB1	id_uc002pdl.3_197_WT	id_uc002pdl.3_197_WT	id_uc002pdl.3_197
ATGGGGTTCGGTATGCGCCCCCGTGCTCCTTCTGGCCGCTCTGCCTCCGGTGCTGCTGCCTGGGGCGGCCGGCTTCACACCTTATTTGAGCAAGGCTCCCCGAGACGAT	WT	TwoExp	id_uc001dpn.3_507_WT	id_uc001dpn.3_507_WT	id_uc001dpn.3_507
ATGGGGTTCGGTATGCGCCCTGCAGCTGCAGAAGGTGACTGTCCTGGGCGTGGCCACGGCGCCCCAGCAGGTCCTCTCCAACGCTAGGTCTAAGGCTCCCCGAGACGAT	WT	TwoExp	id_uc002jxq.3_2829_WT	id_uc002jxq.3_2829_WT	id_uc002jxq.3_2829
ATGGGGTTCGGTATGCGCAACAGGCGGCACATCATTGATAATAGGGTGCATTGTTGCTTTTACTTTATTTCACCTTTTGGACAGCACACGGAAGGCTCCCCGAGACGAT	WT	Pus1	id_uc002wbd.3_762_WT	id_uc002wbd.3_762_WT	id_uc002wbd.3_762
ATGGGGTTCGGTATGCGCCAGAAAGTAGAAGCTTTTGAGCATCGAATGTATTCTCATCCACTTCACAATGATCCAAATTTGGATACATAGAAAGGCTCCCCGAGACGAT	WT	Pus1	id_uc003jpy.4_2682_WT	id_uc003jpy.4_2682_WT	id_uc003jpy.4_2682
ATGGGGTTCGGTATGCGCCTCTGGGAGGACCTTGGATGACTTTCTGACCTTCCCCAGGCACGTTTTCAGGGTCATGATCCTGCGGCTGCTCAAGGCTCCCCGAGACGAT	WT	TwoExp	id_uc003wcj.3_526_WT	id_uc003wcj.3_526_WT	id_uc003wcj.3_526
ATGGGGTTCGGTATGCGCAGAAGATCTGCGAGGTTGTCTGCTAAACCTGCTCCTCCAAAGCCAGAGCCCAAGCCTAAAAAGGCTCGAAGTCAAGGCTCCCCGAGACGAT	WT	TwoExp	id_uc001xff.4_4363_WT	id_uc001xff.4_4363_WT	id_uc001xff.4_4363
ATGGGGTTCGGTATGCGCATGGACCTAGAGCCTCAGGATATTCAAGGGGTTCGAACCCATGAACTGAAGCCCTATGTCATATTCGTATTACAAGGCTCCCCGAGACGAT	WT	PredictedTRUB1	id_uc002uyi.4_1450_WT	id_uc002uyi.4_1450_WT	id_uc002uyi.4_1450
ATGGGGTTCGGTATGCGCCCGTGTGGAGCTTCCCACCTGCATGTACCGGCTCTCTAACGTGCAAGGCAGGAGCGGCGGCCCAGCGTAAGGGAAGGCTCCCCGAGACGAT	WT	TwoExp	id_uc003tvt.4_194_WT	id_uc003tvt.4_194_WT	id_uc003tvt.4_194
ATGGGGTTCGGTATGCGCTGGGGTCTGAGATTTCTTGTCTCACTGAGGGTTCCAAGCCCCAGCTAGAAATGTGCCCTGTCTCAGCTAAGCCAAGGCTCCCCGAGACGAT	WT	PredictedTRUB1	id_uc011dmd.2_722_WT	id_uc011dmd.2_722_WT	id_uc011dmd.2_722
ATGGGGTTCGGTATGCGCGTTGCTGATGATCAGAAACTTATGATTTGGGATACTCGTTCAAACAATACTTCCAAACCAAGCCAGTGTTGGGAAGGCTCCCCGAGACGAT	WT	TwoExp	id_uc001bvr.3_928_WT	id_uc001bvr.3_928_WT	id_uc001bvr.3_928
ATGGGGTTCGGTATGCGCGATAAACCACATGATGTAGAAATAAATAAAATTATATCCACAACTGCATCAAAGACAGAAACACCACCAAAAAAAGGCTCCCCGAGACGAT	WT	TwoExp	id_uc002xza.3_762_WT	id_uc002xza.3_762_WT	id_uc002xza.3_762
ATGGGGTTCGGTATGCGCTTAGATGAACCAATTGATCTTCTTAATGTAGCTTTCATAGCTGAAGAAAAGACCATGCCAACTACCTACTCTAAAGGCTCCCCGAGACGAT	WT	TwoExp	id_uc002uqt.3_1500_WT	id_uc002uqt.3_1500_WT	id_uc002uqt.3_1500
ATGGGGTTCGGTATGCGCACCGTCTCCAACCCCCGAAAACAAGGACTTGTTTTTTGTCACAAGGTCCTCCGGGGTCCAGCCCTAGTTGGCAAAGGCTCCCCGAGACGAT	WT	TwoExp	id_uc004bln.3_2118_WT	id_uc004bln.3_2118_WT	id_uc004bln.3_2118
ATGGGGTTCGGTATGCGCAGTTACCCTGCCAAGAAGAGTAGAAAATGGGTTCAACTCCTGTTTCGCTCCACCAACACCTCTGTGGATCGGGAAGGCTCCCCGAGACGAT	WT	TwoExp	id_uc001gdt.1_3558_WT	id_uc001gdt.1_3558_WT	id_uc001gdt.1_3558
ATGGGGTTCGGTATGCGCAGTTACCCTGCCAAGAAGAGTAGAAAATGGGTTCAACTCCTGTTTCGCTCCACCAACACCTCTGTGGATCGGGAAGGCTCCCCGAGACGAT	WT	IdentifiedTRUB1	id_uc001gdt.1_3558_WT	id_uc001gdt.1_3558_WT	id_uc001gdt.1_3558
ATGGGGTTCGGTATGCGCAGTTACCCTGCCAAGAAGAGTAGAAAATGGGTTCAACTCCTGTTTCGCTCCACCAACACCTCTGTACTGTCCGAAGGCTCCCCGAGACGAT	WT	TwoExp	id_uc001gdt.1_3558_WT	id_uc001gdt.1_3558_WT	id_uc001gdt.1_3558
ATGGGGTTCGGTATGCGCAGTTACCCTGCCAAGAAGAGTAGAAAATGGGTTCAACTCCTGTTTCGCTCCACCAACACCTCTGTACTGTCCGAAGGCTCCCCGAGACGAT	WT	IdentifiedTRUB1	id_uc001gdt.1_3558_WT	id_uc001gdt.1_3558_WT	id_uc001gdt.1_3558
ATGGGGTTCGGTATGCGCGCTTGGGAGACCACAGCCTTAAGGTCTGCAGTTCCACCCTGCCCATCAAGCCCTTTCTCTCCTGCTCGTCACGAAGGCTCCCCGAGACGAT	WT	PredictedTRUB1	id_uc001ecs.1_1969_WT	id_uc001ecs.1_1969_WT	id_uc001ecs.1_1969
ATGGGGTTCGGTATGCGCAGAGGTTCGCCATCGGTGGTGTGAACTCATTGTTAAGCACAAGTTCACGAAAGCCTACAAAAGTGGGAGGTATAAGGCTCCCCGAGACGAT	WT	TwoExp	id_uc004ava.3_2397_WT	id_uc004ava.3_2397_WT	id_uc004ava.3_2397
ATGGGGTTCGGTATGCGCGGCTGGCATACTCCAGCCGCTGTCCCCTGGGTTCCAGCCCCAGCGCCTGGCTTCTGGTCCTGGTTGGGTCGATAAGGCTCCCCGAGACGAT	WT	PredictedTRUB1	id_uc010akm.3_856_WT	id_uc010akm.3_856_WT	id_uc010akm.3_856
ATGGGGTTCGGTATGCGCCCGAAGAAAATGCATCCACCTCAACTCCCAGTTCAACCCTGGTGCGTCCTATCAGAAGCCGGAGACCCAGTAGAAGGCTCCCCGAGACGAT	WT	PredictedTRUB1	id_uc004ahg.2_1181_WT	id_uc004ahg.2_1181_WT	id_uc004ahg.2_1181
ATGGGGTTCGGTATGCGCGGCCAAGCACAAAGGCTCCAGTGAGCAAATGTTCAAGCCCCTGGTAGCCAGGCCTCCCCTTGCCGTCAAAGTAAAGGCTCCCCGAGACGAT	WT	PredictedTRUB1	id_uc021tuf.1_2087_WT	id_uc021tuf.1_2087_WT	id_uc021tuf.1_2087
ATGGGGTTCGGTATGCGCTTCCAGCCACTTGACTGTCCTCGACGGCCTGTTCCAGACAGGGCGTTTGTTTTGTCCATGCCTTCCTGCTCGCAAGGCTCCCCGAGACGAT	WT	PredictedTRUB1	id_uc002fjv.3_2656_WT	id_uc002fjv.3_2656_WT	id_uc002fjv.3_2656
ATGGGGTTCGGTATGCGCCTCTCCCCTCGTCCACCGCTGCCGCCTCCTTCTTCTGCCGCTCCTGGTGCTGCTTGTGTGCTCGTTGTCGTGTAAGGCTCCCCGAGACGAT	WT	TwoExp	id_uc002jne.3_78_WT	id_uc002jne.3_78_WT	id_uc002jne.3_78
ATGGGGTTCGGTATGCGCTTTTCGCGCCCTCTCGGGACATGTACAGCCACTACGTGCTTCTCAAGTCCATCCGCAACGACATCTTACCAACAAGGCTCCCCGAGACGAT	WT	TwoExp	id_uc010ngz.3_592_WT	id_uc010ngz.3_592_WT	id_uc010ngz.3_592
ATGGGGTTCGGTATGCGCCTCCTCCATCTGCCAGTGTGGGCCCATGGAGATCCGTGCAGACGGCCTGGGCATCCCGCAGCTCCGAAATCCGAAGGCTCCCCGAGACGAT	WT	Pus1	id_uc001lmt.2_162_WT	id_uc001lmt.2_162_WT	id_uc001lmt.2_162
ATGGGGTTCGGTATGCGCCGGCAAGAGACTACCAAGACAGACGCTATGACTGAGGCTGATGTGAATCCAAAGGCCTATCCCCTAGATCCCGAAGGCTCCCCGAGACGAT	WT	CTGsites	id_uc003bat.3_201_WT	id_uc003bat.3_201_WT	id_uc003bat.3_201
ATGGGGTTCGGTATGCGCCGGCAAGAGACTACCAAGACAGACGCTATGACTGAGGCTGATGTGAATCCAAAGGCCTATCCCCTACTCCGTAAAGGCTCCCCGAGACGAT	WT	CTGsites	id_uc003bat.3_201_WT	id_uc003bat.3_201_WT	id_uc003bat.3_201
ATGGGGTTCGGTATGCGCTCCCCGGTCCAACACCATGTCCTCCGCCAGGTTCGACTCCTCGGACCGCTCCGCCTGGTATATGGGCTTTATCAAGGCTCCCCGAGACGAT	WT	PredictedTRUB1	id_uc002ztf.2_527_WT	id_uc002ztf.2_527_WT	id_uc002ztf.2_527
ATGGGGTTCGGTATGCGCTACAAAATGGATCTGTACATCAAAAGGATGGATTAAACGATGATGATTTTGAACCTTACTTGAGTTGAACGTGAAGGCTCCCCGAGACGAT	WT	Pus1	id_uc021okf.1_349_WT	id_uc021okf.1_349_WT	id_uc021okf.1_349
ATGGGGTTCGGTATGCGCTGGGGTGCTGGATGTCATGTATGAGTCCCCTTTCACACTGCTGTCCTGTGGCTATGACACCTATGTGACCGCAAAGGCTCCCCGAGACGAT	WT	Pus1	id_uc001kto.3_1261_WT	id_uc001kto.3_1261_WT	id_uc001kto.3_1261
ATGGGGTTCGGTATGCGCGTTCATCAGAAACAGAATTCTAAAATGTGAGTTCAATTCAATAAATTTGAATTTCTGTAGGAAGACAGGCAGTAAGGCTCCCCGAGACGAT	WT	PredictedTRUB1	id_uc001zbn.2_4760_WT	id_uc001zbn.2_4760_WT	id_uc001zbn.2_4760
ATGGGGTTCGGTATGCGCCGTCATCCAGGCCCTGGATCTCAGTGTCCCACTCATGGACGTGGGGGAGACGGCCATGGTCACTGACATATCAAAGGCTCCCCGAGACGAT	WT	TwoExp	id_uc002njj.1_599_WT	id_uc002njj.1_599_WT	id_uc002njj.1_599
ATGGGGTTCGGTATGCGCCTACACAGAGCTGGATGTTGGTGTGGACACGCTGACCGACGGGCTGTCCAGCCTGACTCCAGTGTGCCATGGTAAGGCTCCCCGAGACGAT	WT	TwoExp	id_uc002ygq.3_814_WT	id_uc002ygq.3_814_WT	id_uc002ygq.3_814
ATGGGGTTCGGTATGCGCCTTGGGTAAATCCACCTTAATCAACACCCTCTTCAAATCCAAAATCAGCCGGAAGTCGGTGCAGCTGGTTTCCAAGGCTCCCCGAGACGAT	WT	Pus1	id_uc002jts.4_1083_WT	id_uc002jts.4_1083_WT	id_uc002jts.4_1083
ATGGGGTTCGGTATGCGCCGGTACCCGGGTCCTGGCCCCAGCGCTGACGTTTTCTCTCCCCTTTCTTCTCTCTTCGCGGTTGCCGATGATCAAGGCTCCCCGAGACGAT	WT	TwoExp	id_uc003gwi.2_306_WT	id_uc003gwi.2_306_WT	id_uc003gwi.2_306
ATGGGGTTCGGTATGCGCTGTTTGGGAGAAATGCTGAGGGGGATGCATGTTCAAGCCATTCAGTAGAGAGCTAAGGAGGGCACGTCTCCCAAAGGCTCCCCGAGACGAT	WT	PredictedTRUB1	id_uc002nps.4_4020_WT	id_uc002nps.4_4020_WT	id_uc002nps.4_4020
ATGGGGTTCGGTATGCGCATTTCTGAAATCATAAATAAGTTTATTCAGGTTCTAACCCTTTGCTGTACACAAGCAGACAGAAACTCAGGAAAAGGCTCCCCGAGACGAT	WT	TwoExp	id_uc003aze.3_2892_WT	id_uc003aze.3_2892_WT	id_uc003aze.3_2892
ATGGGGTTCGGTATGCGCATTTCTGAAATCATAAATAAGTTTATTCAGGTTCTAACCCTTTGCTGTACACAAGCAGACAGAAACTCAGGAAAAGGCTCCCCGAGACGAT	WT	IdentifiedTRUB1	id_uc003aze.3_2892_WT	id_uc003aze.3_2892_WT	id_uc003aze.3_2892
ATGGGGTTCGGTATGCGCATTTCTGAAATCATAAATAAGTTTATTCAGGTTCTAACCCTTTGCTGTACACAAGCAGACAGAAACCATGGCTAAGGCTCCCCGAGACGAT	WT	TwoExp	id_uc003aze.3_2892_WT	id_uc003aze.3_2892_WT	id_uc003aze.3_2892
ATGGGGTTCGGTATGCGCATTTCTGAAATCATAAATAAGTTTATTCAGGTTCTAACCCTTTGCTGTACACAAGCAGACAGAAACCATGGCTAAGGCTCCCCGAGACGAT	WT	IdentifiedTRUB1	id_uc003aze.3_2892_WT	id_uc003aze.3_2892_WT	id_uc003aze.3_2892
ATGGGGTTCGGTATGCGCCGCTTCATCCTGAATCTGCCAACCTTCAGTGTTCGAATCATTGACAAAAATGGCATCCATGACCTGCGTAGGTAAGGCTCCCCGAGACGAT	WT	IdentifiedTRUB1	id_uc001bzf.2_953_WT	id_uc001bzf.2_953_WT	id_uc001bzf.2_953
ATGGGGTTCGGTATGCGCCGCTTCATCCTGAATCTGCCAACCTTCAGTGTTCGAATCATTGACAAAAATGGCATCCATGACCTGCGTAGGTAAGGCTCCCCGAGACGAT	WT	TwoExp	id_uc001bzf.2_953_WT	id_uc001bzf.2_953_WT	id_uc001bzf.2_953
ATGGGGTTCGGTATGCGCCGCTTCATCCTGAATCTGCCAACCTTCAGTGTTCGAATCATTGACAAAAATGGCATCCATGACCTATGCGTCGAAGGCTCCCCGAGACGAT	WT	IdentifiedTRUB1	id_uc001bzf.2_953_WT	id_uc001bzf.2_953_WT	id_uc001bzf.2_953
ATGGGGTTCGGTATGCGCCGCTTCATCCTGAATCTGCCAACCTTCAGTGTTCGAATCATTGACAAAAATGGCATCCATGACCTATGCGTCGAAGGCTCCCCGAGACGAT	WT	TwoExp	id_uc001bzf.2_953_WT	id_uc001bzf.2_953_WT	id_uc001bzf.2_953
ATGGGGTTCGGTATGCGCTTTGAGATCCAGATAGACATGGTTTGTGCACTTACGTCCAGATGGGAAGCATCCTTCCTGCAACCACAAACTCAAGGCTCCCCGAGACGAT	WT	TwoExp	id_uc003mbw.4_1987_WT	id_uc003mbw.4_1987_WT	id_uc003mbw.4_1987
ATGGGGTTCGGTATGCGCGCTGAAAGGAATCTGCAGTCTCCTGCTGCAGTTCAACTCTGCTGTTTTTCAGTCATTTCCTACTGTTGACGCGAAGGCTCCCCGAGACGAT	WT	TwoExp	id_uc002knz.3_2677_WT	id_uc002knz.3_2677_WT	id_uc002knz.3_2677
ATGGGGTTCGGTATGCGCGCTGAAAGGAATCTGCAGTCTCCTGCTGCAGTTCAACTCTGCTGTTTTTCAGTCATTTCCTACTGTTGACGCGAAGGCTCCCCGAGACGAT	WT	IdentifiedTRUB1	id_uc002knz.3_2677_WT	id_uc002knz.3_2677_WT	id_uc002knz.3_2677
ATGGGGTTCGGTATGCGCGCTGAAAGGAATCTGCAGTCTCCTGCTGCAGTTCAACTCTGCTGTTTTTCAGTCATTTCCTACTGTGACCGGGAAGGCTCCCCGAGACGAT	WT	TwoExp	id_uc002knz.3_2677_WT	id_uc002knz.3_2677_WT	id_uc002knz.3_2677
ATGGGGTTCGGTATGCGCGCTGAAAGGAATCTGCAGTCTCCTGCTGCAGTTCAACTCTGCTGTTTTTCAGTCATTTCCTACTGTGACCGGGAAGGCTCCCCGAGACGAT	WT	IdentifiedTRUB1	id_uc002knz.3_2677_WT	id_uc002knz.3_2677_WT	id_uc002knz.3_2677
ATGGGGTTCGGTATGCGCTTTCTGTCTTGAAACTTTCATGACCTACTATATACTCAAAAATCATCAGAAGTCTTTCCATGCCAATCGATCTAAGGCTCCCCGAGACGAT	WT	TwoExp	id_uc003etw.3_2572_WT	id_uc003etw.3_2572_WT	id_uc003etw.3_2572
ATGGGGTTCGGTATGCGCGTTATGAGTGTGGGAAGGCGTTCAGTCAGAGTTCGAGCCTCTGCATCCACCAGAGAGTCCACACTTATAATTAAAGGCTCCCCGAGACGAT	WT	TwoExp	id_uc001uga.3_1528_WT	id_uc001uga.3_1528_WT	id_uc001uga.3_1528
ATGGGGTTCGGTATGCGCGTTATGAGTGTGGGAAGGCGTTCAGTCAGAGTTCGAGCCTCTGCATCCACCAGAGAGTCCACACTTATAATTAAAGGCTCCCCGAGACGAT	WT	IdentifiedTRUB1	id_uc001uga.3_1528_WT	id_uc001uga.3_1528_WT	id_uc001uga.3_1528
ATGGGGTTCGGTATGCGCGTTATGAGTGTGGGAAGGCGTTCAGTCAGAGTTCGAGCCTCTGCATCCACCAGAGAGTCCACACTTCCGATCAAAGGCTCCCCGAGACGAT	WT	TwoExp	id_uc001uga.3_1528_WT	id_uc001uga.3_1528_WT	id_uc001uga.3_1528
ATGGGGTTCGGTATGCGCGTTATGAGTGTGGGAAGGCGTTCAGTCAGAGTTCGAGCCTCTGCATCCACCAGAGAGTCCACACTTCCGATCAAAGGCTCCCCGAGACGAT	WT	IdentifiedTRUB1	id_uc001uga.3_1528_WT	id_uc001uga.3_1528_WT	id_uc001uga.3_1528
ATGGGGTTCGGTATGCGCACCGGAAATGGGACCTTCTGGCTGCCTACAGTTCAACCCTTTCAGGAGGGCACCTATCTGGCCACAGCAAATAAAGGCTCCCCGAGACGAT	WT	IdentifiedTRUB1	id_uc003ody.3_1130_WT	id_uc003ody.3_1130_WT	id_uc003ody.3_1130
ATGGGGTTCGGTATGCGCAGAGTAGTAGTAAGAAACATGGGAGAGTGCTATTCCCTTCAGCAAGCTCAAGCTTTTTATACGTTGCCCGAGAAAGGCTCCCCGAGACGAT	WT	Pus1	id_uc009zuk.3_325_WT	id_uc009zuk.3_325_WT	id_uc009zuk.3_325
ATGGGGTTCGGTATGCGCATGACCCACTCTATGGGAAACTCTTCAGCACCTACCTGCGCCCCCCACACACCTCTCGAGGCACCAGTTTCCTAAGGCTCCCCGAGACGAT	WT	TwoExp	id_uc001zig.3_1551_WT	id_uc001zig.3_1551_WT	id_uc001zig.3_1551
ATGGGGTTCGGTATGCGCCTGAGTGCTGACCAGTGCCGGCAGAAATCAGTTCCACCCTGTGGCCCTGACACTATATGTCAGGGCTTTACATAAGGCTCCCCGAGACGAT	WT	PredictedTRUB1	id_uc001xhr.3_8750_WT	id_uc001xhr.3_8750_WT	id_uc001xhr.3_8750
ATGGGGTTCGGTATGCGCTTTCGAATTACATTAGCCACATTGTCAAGTGTTCAAATCACAGGTGGTTAGTGGCTACTGTACTGGTGGTAATAAGGCTCCCCGAGACGAT	WT	PredictedTRUB1	id_uc002uba.3_2694_WT	id_uc002uba.3_2694_WT	id_uc002uba.3_2694
ATGGGGTTCGGTATGCGCTGGGCGGCGGCTCCACGTCCCGAGCTACCTCTTTCCTGCTGGCTTTGGAGCCTGAGCTCGAGGCCTTACGAAAAAGGCTCCCCGAGACGAT	WT	TwoExp	id_uc003ekr.1_282_WT	id_uc003ekr.1_282_WT	id_uc003ekr.1_282
ATGGGGTTCGGTATGCGCGGGGGGAACATATTTGTATTAGATGGAAGTCATGATGATGGGCAGCGCCCGAGTGGCGGAGCTGCTTAGGTCTAAGGCTCCCCGAGACGAT	WT	TwoExp	id_uc003zpj.3_430_WT	id_uc003zpj.3_430_WT	id_uc003zpj.3_430
ATGGGGTTCGGTATGCGCGGTCCCTCCTGGAGTGAGGGGCAATCCCGTACTGAAGTTCGTGCGCAATGTGCCCTGGGAATTTGGACGCGTGAAGGCTCCCCGAGACGAT	WT	CTGsites	id_uc002pbu.2_223_WT	id_uc002pbu.2_223_WT	id_uc002pbu.2_223
ATGGGGTTCGGTATGCGCGGTCCCTCCTGGAGTGAGGGGCAATCCCGTACTGAAGTTCGTGCGCAATGTGCCCTGGGAATTTGGAAGGTGTAAGGCTCCCCGAGACGAT	WT	CTGsites	id_uc002pbu.2_223_WT	id_uc002pbu.2_223_WT	id_uc002pbu.2_223
ATGGGGTTCGGTATGCGCTGAGCCTCACAGCCCCTCTCTGGAGGCCTTTCTAGGGGATGTTTTTTTATAAGCCAGATGTTTTTGCAACAGTAAGGCTCCCCGAGACGAT	WT	Pus1	id_uc002box.3_1553_WT	id_uc002box.3_1553_WT	id_uc002box.3_1553
ATGGGGTTCGGTATGCGCGGTGTTCCCAATATACCCACAAGACAACATGTTCAAAACTTCATCACCTGGTCCCCACAAACCTAGAGAGGTAAAGGCTCCCCGAGACGAT	WT	PredictedTRUB1	id_uc002lfg.2_3445_WT	id_uc002lfg.2_3445_WT	id_uc002lfg.2_3445
ATGGGGTTCGGTATGCGCATATTGGGGGAAATTGCTACATTCTCTCAGGGTCACGTGATGCAACTCTTTTGCTGTGGTATTGGCACGCTCGAAGGCTCCCCGAGACGAT	WT	Pus1	id_uc003ilu.4_8234_WT	id_uc003ilu.4_8234_WT	id_uc003ilu.4_8234
ATGGGGTTCGGTATGCGCGTTCTCCATAAACCAGTCCTGCCTCCCTGGGTTCTATACCCCAGCTGAACTGAAGCCCTTCTGGGAGCGACACAAGGCTCCCCGAGACGAT	WT	PredictedTRUB1	id_uc001ryk.2_504_WT	id_uc001ryk.2_504_WT	id_uc001ryk.2_504
ATGGGGTTCGGTATGCGCGGAGCCCGCGCTGCCCTCCGGCGCCGGCCCCCTGCCCGACCGCGCCCCGGCCCCGCCGCCCCCGGCTACCAGTAAGGCTCCCCGAGACGAT	WT	CTGsites	id_uc003yyx.2_648_WT	id_uc003yyx.2_648_WT	id_uc003yyx.2_648
ATGGGGTTCGGTATGCGCGGAGCCCGCGCTGCCCTCCGGCGCCGGCCCCCTGCCCGACCGCGCCCCGGCCCCGCCGCCCCCGGCAGTGCAAAAGGCTCCCCGAGACGAT	WT	CTGsites	id_uc003yyx.2_648_WT	id_uc003yyx.2_648_WT	id_uc003yyx.2_648
ATGGGGTTCGGTATGCGCGAGGACTCACTGGAGGAATGTGCCATCACTTGTTCAAATAGCCACGGCCCTTGTGACTCCAACCAATAAGTAAAAGGCTCCCCGAGACGAT	WT	TwoExp	id_uc009vos.1_2335_WT	id_uc009vos.1_2335_WT	id_uc009vos.1_2335
ATGGGGTTCGGTATGCGCGAGGACTCACTGGAGGAATGTGCCATCACTTGTTCAAATAGCCACGGCCCTTGTGACTCCAACCAAGGTGTGCAAGGCTCCCCGAGACGAT	WT	TwoExp	id_uc010ozk.1_1404_WT	id_uc010ozk.1_1404_WT	id_uc010ozk.1_1404
ATGGGGTTCGGTATGCGCGAGGACTCACTGGAGGAATGTGCCATCACTTGTTCAAATAGCCACGGCCCTTGTGACTCCAACCACGAGATAAAAGGCTCCCCGAGACGAT	WT	TwoExp	id_uc021oul.1_669_WT	id_uc021oul.1_669_WT	id_uc021oul.1_669
ATGGGGTTCGGTATGCGCGAGGACTCACTGGAGGAATGTGCCATCACTTGTTCAAATAGCCACGGCCCTTGTGACTCCAACCATGCCAGACAAGGCTCCCCGAGACGAT	WT	TwoExp	id_uc001eli.3_599_WT	id_uc001eli.3_599_WT	id_uc001eli.3_599
ATGGGGTTCGGTATGCGCCACAGACGGACCCCCCACCCCCACACGCACTTTATGAGGGAGACCCCGACAGAGGACGCTTGAGCATTTGCAGAAGGCTCCCCGAGACGAT	WT	TwoExp	id_uc002chi.3_3684_WT	id_uc002chi.3_3684_WT	id_uc002chi.3_3684
ATGGGGTTCGGTATGCGCACCCCAGCTACCATGTCCCAGATAGCCAAGGATGTGTGCACCTTCCTGCGCTGGGCATCTGAGCCCTAGCAGCAAGGCTCCCCGAGACGAT	WT	Dkc1	id_uc003zay.3_1473_WT	id_uc003zay.3_1473_WT	id_uc003zay.3_1473
ATGGGGTTCGGTATGCGCCAGTTTGGGAGGCCAAGGCCTCGGGATGTCTCTGGCAGATGAGCTCTTAGCTGATCTCGAAGAGGCCAAACAAAAGGCTCCCCGAGACGAT	WT	CTGsites	id_uc021vbi.1_1324_WT	id_uc021vbi.1_1324_WT	id_uc021vbi.1_1324
ATGGGGTTCGGTATGCGCCAGTTTGGGAGGCCAAGGCCTCGGGATGTCTCTGGCAGATGAGCTCTTAGCTGATCTCGAAGAGGCCCTCATCAAGGCTCCCCGAGACGAT	WT	CTGsites	id_uc021vbi.1_1324_WT	id_uc021vbi.1_1324_WT	id_uc021vbi.1_1324
ATGGGGTTCGGTATGCGCATGATGCACGTGCAACAGCTGTCTCTTGCGTCTTTATGTGTGAAAAAACAACAGCCAAAGAAGCCGACGGGGGAAGGCTCCCCGAGACGAT	WT	Pus1	id_uc002ihf.3_808_WT	id_uc002ihf.3_808_WT	id_uc002ihf.3_808
ATGGGGTTCGGTATGCGCGGGCCCCGCGCCGCGGCGGCGGCTGCGGCCGCTGGCAGCGCTGGCCCTGGTCCTGGCGCTGGCCCCAAACTCGAAGGCTCCCCGAGACGAT	WT	CTGsites	id_uc001hjd.3_96_WT	id_uc001hjd.3_96_WT	id_uc001hjd.3_96
ATGGGGTTCGGTATGCGCGGGCCCCGCGCCGCGGCGGCGGCTGCGGCCGCTGGCAGCGCTGGCCCTGGTCCTGGCGCTGGCCCTCAGGGGAAAGGCTCCCCGAGACGAT	WT	CTGsites	id_uc001hjd.3_96_WT	id_uc001hjd.3_96_WT	id_uc001hjd.3_96
ATGGGGTTCGGTATGCGCTGTGGAATGGGCACAGCAGTTTGGGGGAGCTGTTATGTACCCAAGCAAAGAAACAGCCCACTGGACCCTGCGGAAGGCTCCCCGAGACGAT	WT	TwoExp	id_uc001fyw.3_392_WT	id_uc001fyw.3_392_WT	id_uc001fyw.3_392
ATGGGGTTCGGTATGCGCGAAGATCAAGGTCTGTGGTAAGAAGACGAAGCTTCAGTATCTCACCAGTCAGATTAAGGCGATCACGCCTCACAAGGCTCCCCGAGACGAT	WT	TwoExp	id_uc002yse.1_6078_WT	id_uc002yse.1_6078_WT	id_uc002yse.1_6078
ATGGGGTTCGGTATGCGCCTCGCGGGCCCCGCTCCCGCCCTCCGCTCGCCTGGCCCGGACCGGAAGCGGCGCCGCACGGCCTGATAAGAAGAAGGCTCCCCGAGACGAT	WT	CTGsites	id_uc002ege.2_90_WT	id_uc002ege.2_90_WT	id_uc002ege.2_90
ATGGGGTTCGGTATGCGCCTCGCGGGCCCCGCTCCCGCCCTCCGCTCGCCTGGCCCGGACCGGAAGCGGCGCCGCACGGCCTGAGTTAAATAAGGCTCCCCGAGACGAT	WT	CTGsites	id_uc002ege.2_90_WT	id_uc002ege.2_90_WT	id_uc002ege.2_90
ATGGGGTTCGGTATGCGCAAGTGTGTGGTGGTGGGAGACGGAGCTGTAGGTAAAACTTGCCTACTGATCAGTTACACAACCAAACTCGTGAAAGGCTCCCCGAGACGAT	WT	TwoExp	id_uc003spw.3_287_WT	id_uc003spw.3_287_WT	id_uc003spw.3_287
ATGGGGTTCGGTATGCGCCGGGTGGCTGAGCAGCGGCCTGGTGCGCTCGCTTAGCGGGCGACGGAATCAGACGGACGTGGACGCGGACTCCAAGGCTCCCCGAGACGAT	WT	TwoExp	id_uc002pmk.3_297_WT	id_uc002pmk.3_297_WT	id_uc002pmk.3_297
ATGGGGTTCGGTATGCGCAATCAATAGATAAGGATGAAGAATTTGCCGGTTCTAGTCCACAGAGTTCCAAATCCACAGTTGTTCTACGGTGAAGGCTCCCCGAGACGAT	WT	IdentifiedTRUB1	id_uc001zfc.3_724_WT	id_uc001zfc.3_724_WT	id_uc001zfc.3_724
ATGGGGTTCGGTATGCGCAATCAATAGATAAGGATGAAGAATTTGCCGGTTCTAGTCCACAGAGTTCCAAATCCACAGTTGTTCTACGGTGAAGGCTCCCCGAGACGAT	WT	TwoExp	id_uc001zfc.3_724_WT	id_uc001zfc.3_724_WT	id_uc001zfc.3_724
ATGGGGTTCGGTATGCGCAATCAATAGATAAGGATGAAGAATTTGCCGGTTCTAGTCCACAGAGTTCCAAATCCACAGTTGTTCCTTAGTAAAGGCTCCCCGAGACGAT	WT	IdentifiedTRUB1	id_uc001zfc.3_724_WT	id_uc001zff.3_827_WT	id_uc001zff.3_827
ATGGGGTTCGGTATGCGCAATCAATAGATAAGGATGAAGAATTTGCCGGTTCTAGTCCACAGAGTTCCAAATCCACAGTTGTTCCTTAGTAAAGGCTCCCCGAGACGAT	WT	TwoExp	id_uc001zfc.3_724_WT	id_uc001zff.3_827_WT	id_uc001zff.3_827
ATGGGGTTCGGTATGCGCTCGGCTGCTTTGCCAAGCTCACCAACACCTACTGTCTGGTAGCGATCGGAGGCTCAGAGAACTTCCGTTTCCTAAGGCTCCCCGAGACGAT	WT	Dkc1	id_uc002xby.1_142_WT	id_uc002xby.1_142_WT	id_uc002xby.1_142
ATGGGGTTCGGTATGCGCAGTGTGTGGAGGAGGCATCTGTGTGGTGGCCCTGGCACTGCAGAGACTGGTCCGGGCTGTCAGGATGCCGTCAAAGGCTCCCCGAGACGAT	WT	Dkc1	id_uc003gcu.1_1777_WT	id_uc003gcu.1_1777_WT	id_uc003gcu.1_1777
ATGGGGTTCGGTATGCGCGAGGGTCCCAGAGCACACACCCTCTGGAAAGTTCCAGCCTTGTTTATACGTTCTACAGTGTAGCAGAAGCGCAAAGGCTCCCCGAGACGAT	WT	PredictedTRUB1	id_uc002bva.1_1848_WT	id_uc002bva.1_1848_WT	id_uc002bva.1_1848
ATGGGGTTCGGTATGCGCCCCTGCCCCACCTGTGCAGCGTACTTCTGGCTTTTGCGCGTCTGAACTTCCATCCAGACCAAGAGAAGATAGTAAGGCTCCCCGAGACGAT	WT	Dkc1	id_uc003tmw.3_902_WT	id_uc003tmw.3_902_WT	id_uc003tmw.3_902
ATGGGGTTCGGTATGCGCCTACCAGAGATTCACTGACTGCTATAAGTGCTTCTACCAGTTGCAGCCTGCGATGACACAGCAAACGAGCTCTAAGGCTCCCCGAGACGAT	WT	TwoExp	id_uc009wru.2_853_WT	id_uc009wru.2_853_WT	id_uc009wru.2_853
ATGGGGTTCGGTATGCGCCTGGGCGCGCGCACGCTGGGGCCCCGCGGGGCTGGCCGCCTAGCGAGCCTGCCGGTCGACCCCAGTCTTTGGAAAGGCTCCCCGAGACGAT	WT	CTGsites	id_uc001dbu.1_94_WT	id_uc001dbu.1_94_WT	id_uc001dbu.1_94
ATGGGGTTCGGTATGCGCCTGGGCGCGCGCACGCTGGGGCCCCGCGGGGCTGGCCGCCTAGCGAGCCTGCCGGTCGACCCCAGAACCATAGAAGGCTCCCCGAGACGAT	WT	CTGsites	id_uc001dbu.1_94_WT	id_uc001dbu.1_94_WT	id_uc001dbu.1_94
ATGGGGTTCGGTATGCGCCGGCACTGCAGGGCCCGAGCCAGGCCAAGTCCTGTATCTGCCATGTCTGTGGCGTCCACCTCAACTCTGGGTGAAGGCTCCCCGAGACGAT	WT	CTGsites	id_uc002gyn.4_146_WT	id_uc002gyn.4_146_WT	id_uc002gyn.4_146
ATGGGGTTCGGTATGCGCCGGCACTGCAGGGCCCGAGCCAGGCCAAGTCCTGTATCTGCCATGTCTGTGGCGTCCACCTCAACTGGATGGGAAGGCTCCCCGAGACGAT	WT	CTGsites	id_uc002gyn.4_146_WT	id_uc002gyn.4_146_WT	id_uc002gyn.4_146
ATGGGGTTCGGTATGCGCTACTGTTCCTGTTGGCCGAGTGGAGACTGGTGTTCTCAAACCCGGTATGGTGGTCACCTTTGCTCGTGGCATTAAGGCTCCCCGAGACGAT	WT	Pus1	id_uc003phj.3_876_WT	id_uc003phj.3_876_WT	id_uc003phj.3_876
ATGGGGTTCGGTATGCGCCGCATGCTTAATGCTTCTGGGGAGGAGGGGGCTGGTCCCAGCGGAGCCGCACTCTTCGCCCGCTCTCGACAGCAAGGCTCCCCGAGACGAT	WT	TwoExp	id_uc002wdh.3_1845_WT	id_uc002wdh.3_1845_WT	id_uc002wdh.3_1845
ATGGGGTTCGGTATGCGCAAAGAAAGGGAGAGGAGTTGAGGTCCCAAGGTTCAAGGCCTGGTGATCTCCAGGTCCCAGGCTGGGCTGGCCTAAGGCTCCCCGAGACGAT	WT	PredictedTRUB1	id_uc003cld.1_110_WT	id_uc003cld.1_110_WT	id_uc003cld.1_110
ATGGGGTTCGGTATGCGCTTGGCTGCCGTCCCCGCTGCTGTGCATTGGGTTAAAAACGACAACCAACATCAGCCATGAAAGATTTAGGCCGAAGGCTCCCCGAGACGAT	WT	TwoExp	id_uc003led.3_155_WT	id_uc003led.3_155_WT	id_uc003led.3_155
ATGGGGTTCGGTATGCGCCAGCGTCTTCGCTGCTGCTGGATAGTCGTGTTTTCGGGGATCGAGGATACTCACCAGAAACCGAACTCTTTTGAAGGCTCCCCGAGACGAT	WT	TwoExp	id_uc003qru.4_149_WT	id_uc003qru.4_149_WT	id_uc003qru.4_149
ATGGGGTTCGGTATGCGCCAGCATGTTGAGTCAAGTTTACCGCTGTGGGTTCCAGCCCTTCAACCAACATCTTCTGCCCTGGGGCGACACAAAGGCTCCCCGAGACGAT	WT	TwoExp	id_uc001kky.3_272_WT	id_uc001kky.3_272_WT	id_uc001kky.3_272
ATGGGGTTCGGTATGCGCCAGCATGTTGAGTCAAGTTTACCGCTGTGGGTTCCAGCCCTTCAACCAACATCTTCTGCCCTGGGGCGACACAAAGGCTCCCCGAGACGAT	WT	IdentifiedTRUB1	id_uc001kky.3_272_WT	id_uc001kky.3_272_WT	id_uc001kky.3_272
ATGGGGTTCGGTATGCGCCAGCATGTTGAGTCAAGTTTACCGCTGTGGGTTCCAGCCCTTCAACCAACATCTTCTGCCCTGGGTTTGACTAAAGGCTCCCCGAGACGAT	WT	TwoExp	id_uc001kky.3_272_WT	id_uc001kkz.3_272_WT	id_uc001kkz.3_272
ATGGGGTTCGGTATGCGCCAGCATGTTGAGTCAAGTTTACCGCTGTGGGTTCCAGCCCTTCAACCAACATCTTCTGCCCTGGGTTTGACTAAAGGCTCCCCGAGACGAT	WT	IdentifiedTRUB1	id_uc001kky.3_272_WT	id_uc001kkz.3_272_WT	id_uc001kkz.3_272
ATGGGGTTCGGTATGCGCGCGACAACAGCATCAGGGCATTCTTAGCAGGGTTACAGAATCTGTTAAGAATATTGTGCCAGGGTGGTACCTTAAGGCTCCCCGAGACGAT	WT	Pus1	id_uc003ncd.1_329_WT	id_uc003ncd.1_329_WT	id_uc003ncd.1_329
ATGGGGTTCGGTATGCGCGGACATGCGCGTGCAGACTTTCAGCATTCATTTTGGGTTCAAGCACAAGTTTCTGGCCAGCGACGACCTTTCTAAGGCTCCCCGAGACGAT	WT	TwoExp	id_uc002zpr.3_1173_WT	id_uc002zpr.3_1173_WT	id_uc002zpr.3_1173
ATGGGGTTCGGTATGCGCGCAGCTCATCTTTCTGGTGGACTCCAATCCCTTTCCCTTTGGCTATATCAGCAACTACACCGTCTATGACAAGAAGGCTCCCCGAGACGAT	WT	TwoExp	id_uc010uzk.2_1195_WT	id_uc010uzk.2_1195_WT	id_uc010uzk.2_1195
ATGGGGTTCGGTATGCGCGCAGCTCATCTTTCTGGTGGACTCCAATCCCTTTCCCTTTGGCTATATCAGCAACTACACCGTCTATGACAAGAAGGCTCCCCGAGACGAT	WT	TwoExp	id_uc010uzk.2_1195_WT	id_uc010uzk.2_1195_WT	id_uc010uzk.2_1195
ATGGGGTTCGGTATGCGCGCAGCTCATCTTTCTGGTGGACTCCAATCCCTTTCCCTTTGGCTATATCAGCAACTACACCGTCTAGTCCTTGAAGGCTCCCCGAGACGAT	WT	TwoExp	id_uc010uzk.2_1195_WT	id_uc010vac.2_1195_WT	id_uc010vac.2_1195
ATGGGGTTCGGTATGCGCGCAGCTCATCTTTCTGGTGGACTCCAATCCCTTTCCCTTTGGCTATATCAGCAACTACACCGTCTAGTCCTTGAAGGCTCCCCGAGACGAT	WT	TwoExp	id_uc010uzk.2_1195_WT	id_uc010vac.2_1195_WT	id_uc010vac.2_1195
ATGGGGTTCGGTATGCGCACTTCAGCCAGCGCTATGCCAAGGTCCCCCTCTTCAGCCCCAACTTCAGCGAGAAAGTGGGAGTTCTTCCACTAAGGCTCCCCGAGACGAT	WT	TwoExp	id_uc002gnz.4_2321_WT	id_uc002gnz.4_2321_WT	id_uc002gnz.4_2321
ATGGGGTTCGGTATGCGCCAGGTTTGTGGAGTCTGTGGATGAATATCAGTTTGTGGAGCGCCTGTTACCGGCTACCAGGATCCTACGGGGTAAGGCTCCCCGAGACGAT	WT	Pus1	id_uc001oda.2_244_WT	id_uc001oda.2_244_WT	id_uc001oda.2_244
ATGGGGTTCGGTATGCGCGGGACTTGGCATTGCATCTGATTTAATGAACTTAAGTCTGTGAATAAGCCTTTGTGTTAACGACTGATTATAGAAGGCTCCCCGAGACGAT	WT	TwoExp	id_uc003ljg.3_500_WT	id_uc003ljg.3_500_WT	id_uc003ljg.3_500
ATGGGGTTCGGTATGCGCAGAGCTCCAGATGGGCAAGGAAGAGGCTTGGTTCTAGCCTGGCTCTGCCCCTCACTGCAGTGGATGCTCCCGGAAGGCTCCCCGAGACGAT	WT	PredictedTRUB1	id_uc002vws.3_2513_WT	id_uc002vws.3_2513_WT	id_uc002vws.3_2513
ATGGGGTTCGGTATGCGCAAGGCTTGAAGAGGATAGGCACAGCATTGATATTACCTCAGAGCTGTGGAATGATGAGCTTCAGTCTTCCGAAAAGGCTCCCCGAGACGAT	WT	Pus1	id_uc001wtl.3_657_WT	id_uc001wtl.3_657_WT	id_uc001wtl.3_657
ATGGGGTTCGGTATGCGCGCTGCTGGCCTTGCTGCAAGAATGTCCCAGGTTCCAGCCCCGGTGCCTCTCATGAGTCTCAGAACATAGTGCTAAGGCTCCCCGAGACGAT	WT	Dkc1	id_uc002crj.1_6910_WT	id_uc002crj.1_6910_WT	id_uc002crj.1_6910
ATGGGGTTCGGTATGCGCACTTCGCTTTCTTTTGGGAAATGTGGCTGATTTCAACCCAGAAACAGATTCCATCCCTGTAAACGACGGTGCAAAGGCTCCCCGAGACGAT	WT	TwoExp	id_uc001hmc.3_2324_WT	id_uc001hmc.3_2324_WT	id_uc001hmc.3_2324
ATGGGGTTCGGTATGCGCCTCCGGCTGGCAGGCCTTCTTTCCCATGCATTTCCAAGCCTTCCACCCAGCTGTGGCCCCACCACTCATTCTCAAGGCTCCCCGAGACGAT	WT	TwoExp	id_uc002vmc.4_2159_WT	id_uc002vmc.4_2159_WT	id_uc002vmc.4_2159
ATGGGGTTCGGTATGCGCTTGGTCTCTACTTATGCTCATCAGCTAATAGTTCTACTCTAAAGGACACTGTCATGGCTATGATGAAAATCTCAAGGCTCCCCGAGACGAT	WT	PredictedTRUB1	id_uc002fvj.1_800_WT	id_uc002fvj.1_800_WT	id_uc002fvj.1_800
ATGGGGTTCGGTATGCGCAGCGATGAAGATGGTCGCGCCCTGGACGCGGTTCTACTCCAACAGCTGCTGCTTGTGCTGCCATGAGCAGATGAAGGCTCCCCGAGACGAT	WT	TwoExp	id_uc003yia.3_459_WT	id_uc003yia.3_459_WT	id_uc003yia.3_459
ATGGGGTTCGGTATGCGCAGCGATGAAGATGGTCGCGCCCTGGACGCGGTTCTACTCCAACAGCTGCTGCTTGTGCTGCCATGAGCAGATGAAGGCTCCCCGAGACGAT	WT	IdentifiedTRUB1	id_uc003yia.3_459_WT	id_uc003yia.3_459_WT	id_uc003yia.3_459
ATGGGGTTCGGTATGCGCAGCGATGAAGATGGTCGCGCCCTGGACGCGGTTCTACTCCAACAGCTGCTGCTTGTGCTGCCATGTAAGCTGTAAGGCTCCCCGAGACGAT	WT	TwoExp	id_uc003yia.3_459_WT	id_uc003yia.3_459_WT	id_uc003yia.3_459
ATGGGGTTCGGTATGCGCAGCGATGAAGATGGTCGCGCCCTGGACGCGGTTCTACTCCAACAGCTGCTGCTTGTGCTGCCATGTAAGCTGTAAGGCTCCCCGAGACGAT	WT	IdentifiedTRUB1	id_uc003yia.3_459_WT	id_uc003yia.3_459_WT	id_uc003yia.3_459
ATGGGGTTCGGTATGCGCGGGCGCAGGAGGCCGACGCGGGCCCGGCGCCCTGGGCCGCGAGCTCCGCCGCCGCCTGCGAGCTGTTTATCTAAAGGCTCCCCGAGACGAT	WT	CTGsites	id_uc002siu.4_534_WT	id_uc002siu.4_534_WT	id_uc002siu.4_534
ATGGGGTTCGGTATGCGCGGGCGCAGGAGGCCGACGCGGGCCCGGCGCCCTGGGCCGCGAGCTCCGCCGCCGCCTGCGAGCTGTAGTCGTAAAGGCTCCCCGAGACGAT	WT	CTGsites	id_uc002siu.4_534_WT	id_uc002siu.4_534_WT	id_uc002siu.4_534
ATGGGGTTCGGTATGCGCCCGCTGCCCCCCAGCCCCTGCAGATGGGGCCCTGCGCCTACGAGATCAGGCAGTTCCTGGACTGTTAAGCAAAAAGGCTCCCCGAGACGAT	WT	CTGsites	id_uc002zxw.3_385_WT	id_uc002zxw.3_385_WT	id_uc002zxw.3_385
ATGGGGTTCGGTATGCGCCCGCTGCCCCCCAGCCCCTGCAGATGGGGCCCTGCGCCTACGAGATCAGGCAGTTCCTGGACTGTGCGCCTAAAAGGCTCCCCGAGACGAT	WT	CTGsites	id_uc002zxw.3_385_WT	id_uc002zxw.3_385_WT	id_uc002zxw.3_385
ATGGGGTTCGGTATGCGCAGACTACGTCGTCCAGTTTGAAGAAGACCAGTTCCAACCTGGGGTCTGGCATGACCATTCCAAGTTCGCCAACAAGGCTCCCCGAGACGAT	WT	IdentifiedTRUB1	id_uc001hbj.3_2338_WT	id_uc001hbj.3_2338_WT	id_uc001hbj.3_2338
ATGGGGTTCGGTATGCGCTCCCTGGGTGGGGGGACTGGGTCTGGGATGGTTACCCTCCTCATCAGCAAGATCCGGGAGGAGTAGTCTCCAGAAGGCTCCCCGAGACGAT	WT	TwoExp	id_uc010ncq.3_1601_WT	id_uc010ncq.3_1601_WT	id_uc010ncq.3_1601
ATGGGGTTCGGTATGCGCGGGCCACACCAAGGTGAAGGAGCTGGCCAGGTTCAAGCCCATGCAGCGGCACCTGTTCCTGCACGGAGGAACCAAGGCTCCCCGAGACGAT	WT	PredictedTRUB1	id_uc001vsq.3_2646_WT	id_uc001vsq.3_2646_WT	id_uc001vsq.3_2646
ATGGGGTTCGGTATGCGCGGAGCGGTAGGGTCTGGACTGGGCAGATGCTGTATGACCTCCCTGAGCACCCGTGACTGCCCCATTCCCCAAGAAGGCTCCCCGAGACGAT	WT	TwoExp	id_uc003azu.3_2915_WT	id_uc003azu.3_2915_WT	id_uc003azu.3_2915
ATGGGGTTCGGTATGCGCCGTGGCGCAACGGTAGCGCGTCTGACTCCAGATCAGAAGGTTGCGTGTTCAAATCACGTCGGGGTAACGAAACAAGGCTCCCCGAGACGAT	WT	TwoExp	id_uc002gkp.4_1822_WT	id_uc002gkp.4_1822_WT	id_uc002gkp.4_1822
ATGGGGTTCGGTATGCGCCATGGTTACCGAGTGGTAGAGATTCTCGAACATTCTCAAACTCTCTTTTTGGGTAAATGATTGTGGTTACCGCAAGGCTCCCCGAGACGAT	WT	Pus1	id_uc002nuw.4_3316_WT	id_uc002nuw.4_3316_WT	id_uc002nuw.4_3316
ATGGGGTTCGGTATGCGCTCGCCTGGAGCCACTTCAGGGCACCTCAGACGTTGCTCAGGTTCCCCCTGTGGGTTCCGGTCCTCCGGGGTGAAAGGCTCCCCGAGACGAT	WT	Pus1	id_uc004cna.3_1959_WT	id_uc004cna.3_1959_WT	id_uc004cna.3_1959
ATGGGGTTCGGTATGCGCCTCTGTTCACCCGCTTCCTTTGTGTTGCAGCCTCGGAAAATTGAGGAAATCAAGGACTTCCTGCTATTCCCACAAGGCTCCCCGAGACGAT	WT	TwoExp	id_uc002jjy.1_306_WT	id_uc002jjy.1_306_WT	id_uc002jjy.1_306
ATGGGGTTCGGTATGCGCGCGGACGCGACAGGGCTGGCAGCGGTACTACTTTGAGGGCATTAAACAGACCTTTGGCTATGGCGGACCATGGAAGGCTCCCCGAGACGAT	WT	TwoExp	id_uc001xtw.3_1132_WT	id_uc001xtw.3_1132_WT	id_uc001xtw.3_1132
ATGGGGTTCGGTATGCGCTGGATAGCTTTTTTTCTGACTTATGTTGTGGTTGCACCCCTCACAAATGGCAGAACAGTATGTAAACTATCCGAAGGCTCCCCGAGACGAT	WT	TwoExp	id_uc003hwc.2_2521_WT	id_uc003hwc.2_2521_WT	id_uc003hwc.2_2521
ATGGGGTTCGGTATGCGCGACTACAAAGGGAAGTTTTTGTGCCTTGGTGTTCCAGTCACTGATTGTGGTTTTAGAATCTTCTGTACCGTGCAAGGCTCCCCGAGACGAT	WT	PredictedTRUB1	id_uc001uqf.4_3862_WT	id_uc001uqf.4_3862_WT	id_uc001uqf.4_3862
ATGGGGTTCGGTATGCGCGGCTTTTCGACCAGCATTTCCGGCTGACGGGTTCCACCCCGATGCAGGTGGTCACGTGCTTGACGCCGGACTTAAGGCTCCCCGAGACGAT	WT	PredictedTRUB1	id_uc003ded.4_3880_WT	id_uc003ded.4_3880_WT	id_uc003ded.4_3880
ATGGGGTTCGGTATGCGCGTCTTCTTAAAGAGTATGGTTCCTGCCTCAGTTCCAGCCTGGTATGGTTCTTTGATATGCCCTGAGTCAGATAAAGGCTCCCCGAGACGAT	WT	PredictedTRUB1	id_uc003lvk.3_3850_WT	id_uc003lvk.3_3850_WT	id_uc003lvk.3_3850
ATGGGGTTCGGTATGCGCAGCCAAATACATCTGTAATCGCATCATTCAGTTCAAACCTGGACAGGACAGATATTTTACACTGGGCTGCAGTAAGGCTCCCCGAGACGAT	WT	PredictedTRUB1	id_uc003gwy.3_238_WT	id_uc003gwy.3_238_WT	id_uc003gwy.3_238
ATGGGGTTCGGTATGCGCGCGACTGGCGGCTCCAGCAGGGACTACCTTTCTTATAAACCCAGGGGGACCACACACACACACACCAGCACTGAAGGCTCCCCGAGACGAT	WT	TwoExp	id_uc001bza.3_3267_WT	id_uc001bza.3_3267_WT	id_uc001bza.3_3267
ATGGGGTTCGGTATGCGCCCCAGACAAGGACAGCGGTGGCAAGATCGACGTCAGTCTGAACATCAGTTTACCCAATCTGCACTTAAGCCAAAAGGCTCCCCGAGACGAT	WT	TwoExp	id_uc003mbz.4_293_WT	id_uc003mbz.4_293_WT	id_uc003mbz.4_293
ATGGGGTTCGGTATGCGCAAGAAGTGGTGGACTTTGAAAAGTTGGATGACTACGCCTCTGCCTTTCAAGGTCATGATGTTGGAATCAAGGGAAGGCTCCCCGAGACGAT	WT	TwoExp	id_uc001mpx.2_404_WT	id_uc001mpx.2_404_WT	id_uc001mpx.2_404
ATGGGGTTCGGTATGCGCTCATTCCGGCACCACCATGTCGAAGGTTTCCTTTAAGATCACGCTGACGTCGGACCCACGGCTGCCACGCGGGAAGGCTCCCCGAGACGAT	WT	TwoExp	id_uc001uwu.3_133_WT	id_uc001uwu.3_133_WT	id_uc001uwu.3_133
ATGGGGTTCGGTATGCGCGGTTTTAAATATTCATCTGACTGCATATGATATGACCCTGGCAGAGAGTTATGCCCAGTATGTTCCTGTCTCAAAGGCTCCCCGAGACGAT	WT	TwoExp	id_uc001ouh.4_400_WT	id_uc001ouh.4_400_WT	id_uc001ouh.4_400
ATGGGGTTCGGTATGCGCTGAAGAAGAAGCTGTTCAAACGCCGGCGGGTGTTGAATCGGGAGCGGCGTCTGAGGCACCGGGTGATGTGACTAAGGCTCCCCGAGACGAT	WT	Pus1	id_uc001nuf.3_792_WT	id_uc001nuf.3_792_WT	id_uc001nuf.3_792
ATGGGGTTCGGTATGCGCAGGTGACATCACAGAAGATGAGACCATCAGGTTTAAATCCTACTTGCTGAGCATGGGAATAGCTATGTTGCTCAAGGCTCCCCGAGACGAT	WT	TwoExp	id_uc001vgs.3_685_WT	id_uc001vgs.3_685_WT	id_uc001vgs.3_685
ATGGGGTTCGGTATGCGCAGTGAGTAGTTTTATGTATCACCAGACTGGGTTATTGCCAAGTTATATATCACCAAAAGCTGTATAACTCCAAAAGGCTCCCCGAGACGAT	WT	TwoExp	id_uc010dmy.3_3339_WT	id_uc010dmy.3_3339_WT	id_uc010dmy.3_3339
ATGGGGTTCGGTATGCGCTTGGAGCTGGAGGGAGCATCACTGGGCTGAAGTTTAACCCTCTCAATACCAACCAGTTTTACGCCCATCCACTAAGGCTCCCCGAGACGAT	WT	TwoExp	id_uc001neb.2_686_WT	id_uc001neb.2_686_WT	id_uc001neb.2_686
ATGGGGTTCGGTATGCGCCCGGAAGGCGTCGTCTTCTCTTAAAATTTTCTTTTTTAGGTGATTTCCTTCCTGCCAGGCTCCGTTAGGCCTCAAGGCTCCCCGAGACGAT	WT	TwoExp	id_uc010rtc.1_1331_WT	id_uc010rtc.1_1331_WT	id_uc010rtc.1_1331
ATGGGGTTCGGTATGCGCAGGCCGTCTGCCTCACCCGCCACCTCACCGCCTTCGGCGCCAGCCTCTTCGTGCCCCCAAGCCATCTTTACGTAAGGCTCCCCGAGACGAT	WT	Pus1	id_uc002cos.1_9361_WT	id_uc002cos.1_9361_WT	id_uc002cos.1_9361
ATGGGGTTCGGTATGCGCTGACGGGGGTGTCGGCACCCACGGTGACCGTTTTCATCAGCAGCTCCCTCAACACCTTCCGCTCCGATATTACAAGGCTCCCCGAGACGAT	WT	TwoExp	id_uc002odg.1_616_WT	id_uc002odg.1_616_WT	id_uc002odg.1_616
ATGGGGTTCGGTATGCGCCCATTGAAAACCCTGCTGATGTCAGTGTTATATCCTCCAGGAATACTGGCCAGAGGGCTGTGCTGTCGCCTGGAAGGCTCCCCGAGACGAT	WT	TwoExp	id_uc011lsj.1_333_WT	id_uc011lsj.1_333_WT	id_uc011lsj.1_333
ATGGGGTTCGGTATGCGCGGCGAACTCACTGTTCGCCTTCTCGCTGAGCGTGATGGCGGCGCTCACCTTCGGCTGCTTCATCAGGAGAATAAAGGCTCCCCGAGACGAT	WT	TwoExp	id_uc003iur.4_192_WT	id_uc003iur.4_192_WT	id_uc003iur.4_192
ATGGGGTTCGGTATGCGCTTCAGATTCTTTCCTGGAAACCAATGTTCCACTTTTGGTATTGATTGAAGCTGCAAAGAATGGAATCGATCTTAAGGCTCCCCGAGACGAT	WT	TwoExp	id_uc003ldh.3_1298_WT	id_uc003ldh.3_1298_WT	id_uc003ldh.3_1298
ATGGGGTTCGGTATGCGCCAAAGATGTTTCACTTCTAGATCTGGATGATTTTAACCCAGTATCCACTCCAGTTGCACTTCCCATGCTTGTCAAGGCTCCCCGAGACGAT	WT	TwoExp	id_uc003kfj.3_2597_WT	id_uc003kfj.3_2597_WT	id_uc003kfj.3_2597
ATGGGGTTCGGTATGCGCTGTCCAAAGACAAAGGGCTCCTTGGCAAAGTATTGGTTGCTCTGGCATCTGAAGAACTTGCCAAATACTGATGAAGGCTCCCCGAGACGAT	WT	Pus1	id_uc003wob.1_2657_WT	id_uc003wob.1_2657_WT	id_uc003wob.1_2657
ATGGGGTTCGGTATGCGCAGCAGCCTCTATGCTGTGATTTCCACACCGGGTCCGTGCAGAGGAAACAGAAACTCCCAACTGTCGGTCACCAAAGGCTCCCCGAGACGAT	WT	Pus1	id_uc002eel.3_3133_WT	id_uc002eel.3_3133_WT	id_uc002eel.3_3133
ATGGGGTTCGGTATGCGCGGTGATTAACTCTTTTTTCTTTTTAGGTATCATACCGTTCCACTGCCACCAAAAGGAAGGGTTTTGGATATATAAGGCTCCCCGAGACGAT	WT	TwoExp	id_uc001paq.2_814_WT	id_uc001paq.2_814_WT	id_uc001paq.2_814
ATGGGGTTCGGTATGCGCGCAAAGTGGCTTCCTGACGTTTGGCCAGCGGTTCCACCCCTATGTCCAGTACTGCCTCCGAGTGAATGCGCCGAAGGCTCCCCGAGACGAT	WT	PredictedTRUB1	id_uc001qnr.3_919_WT	id_uc001qnr.3_919_WT	id_uc001qnr.3_919
ATGGGGTTCGGTATGCGCCAGGGGAAGGAAGCCAGTTATCAGAGCCAGGTTCCAATCCTGCCTCAGCTACTACATCCCTCCCTACGATCTTAAGGCTCCCCGAGACGAT	WT	PredictedTRUB1	id_uc001ybb.1_773_WT	id_uc001ybb.1_773_WT	id_uc001ybb.1_773
ATGGGGTTCGGTATGCGCGGATCCGGCCACAGGAGACACGATCCCGCTGTTCCAGGCCATGCAGAAGCAGCTCATCGAGAAGGATGGAGGTAAGGCTCCCCGAGACGAT	WT	PredictedTRUB1	id_uc003zaa.1_5983_WT	id_uc003zaa.1_5983_WT	id_uc003zaa.1_5983
ATGGGGTTCGGTATGCGCCTTTCTCCCTTTCTCTCTTTCTCTTTCTGTGTTCAAGTCACATTACATGGGATTCTGTTCTTTTGCAAGTTAGAAGGCTCCCCGAGACGAT	WT	PredictedTRUB1	id_uc001pyw.2_205_WT	id_uc001pyw.2_205_WT	id_uc001pyw.2_205
ATGGGGTTCGGTATGCGCTGTGTATTGTCCCTTAATTTCAGGACTCAGAATTCATGATTGAAGAAATGCAGGTTAGTTTAAACGCGCAATTAAGGCTCCCCGAGACGAT	WT	TwoExp	id_uc001gjk.3_1084_WT	id_uc001gjk.3_1084_WT	id_uc001gjk.3_1084
ATGGGGTTCGGTATGCGCGAAGGGGGGAACATATTTGTATTAGATGGAAGTCATGATGATGGGCAGCGCCCGAGTGGCGGAGCGACGTCGTAAGGCTCCCCGAGACGAT	WT	TwoExp	id_uc003zpj.3_427_WT	id_uc003zpj.3_427_WT	id_uc003zpj.3_427
ATGGGGTTCGGTATGCGCGGCGCGAGGATGACGACCTCAGGCGCGCTCTTTCCAAGCCTGGTGCCAGGCTCTCGGGGCGCCTCAAGAGCTTAAGGCTCCCCGAGACGAT	WT	TwoExp	id_uc002yco.3_101_WT	id_uc002yco.3_101_WT	id_uc002yco.3_101
ATGGGGTTCGGTATGCGCAGAGGCGGGAGCCTGCCACCCTCTTCCTGCCCTACCTCCTACTAACACTTCCTGCCCCATTTGGACGTGAATTAAGGCTCCCCGAGACGAT	WT	TwoExp	id_uc003atr.3_7907_WT	id_uc003atr.3_7907_WT	id_uc003atr.3_7907
ATGGGGTTCGGTATGCGCTGGCGGCCTTCTCCGGCTTTTAGTATTCCAGTTATCCAGATAGTTTATGAAACTCTGAAAGACCAATCGAGCTAAGGCTCCCCGAGACGAT	WT	TwoExp	id_uc010yjq.1_323_WT	id_uc010yjq.1_323_WT	id_uc010yjq.1_323
ATGGGGTTCGGTATGCGCGTGAGCCAGTGACCCATGAACTTGCCGCTCTGTGAGGGCCAGAGTCAGGGCCAGTCATGGTAATGCTAGAACCAAGGCTCCCCGAGACGAT	WT	TwoExp	id_uc002tsd.3_3779_WT	id_uc002tsd.3_3779_WT	id_uc002tsd.3_3779
ATGGGGTTCGGTATGCGCCCTGAACCATTACCAGATGAAAAACCCAAGACTGACAGGCTCCAACTACCCGGGACTCAGTATTAGGTGGTTGAAGGCTCCCCGAGACGAT	WT	CTGsites	id_uc002ojj.1_764_WT	id_uc002ojj.1_764_WT	id_uc002ojj.1_764
ATGGGGTTCGGTATGCGCCCTGAACCATTACCAGATGAAAAACCCAAGACTGACAGGCTCCAACTACCCGGGACTCAGTATTACTATCTAAAAGGCTCCCCGAGACGAT	WT	CTGsites	id_uc002ojj.1_764_WT	id_uc002ojj.1_764_WT	id_uc002ojj.1_764
ATGGGGTTCGGTATGCGCGGGCATCCAGGTTCCGCTGAATGCAACAGAGTTCAACTATCTCTGTCCAGCCATCATCAACCAAATTCCAAAGAAGGCTCCCCGAGACGAT	WT	IdentifiedTRUB1	id_uc010dmy.3_1151_WT	id_uc010dmy.3_1151_WT	id_uc010dmy.3_1151
ATGGGGTTCGGTATGCGCGGGCATCCAGGTTCCGCTGAATGCAACAGAGTTCAACTATCTCTGTCCAGCCATCATCAACCAAATTCCAAAGAAGGCTCCCCGAGACGAT	WT	TwoExp	id_uc010dmy.3_1151_WT	id_uc010dmy.3_1151_WT	id_uc010dmy.3_1151
ATGGGGTTCGGTATGCGCGGGCATCCAGGTTCCGCTGAATGCAACAGAGTTCAACTATCTCTGTCCAGCCATCATCAACCAAATCGTCTTCAAGGCTCCCCGAGACGAT	WT	IdentifiedTRUB1	id_uc010dmy.3_1151_WT	id_uc010dmy.3_1151_WT	id_uc010dmy.3_1151
ATGGGGTTCGGTATGCGCGGGCATCCAGGTTCCGCTGAATGCAACAGAGTTCAACTATCTCTGTCCAGCCATCATCAACCAAATCGTCTTCAAGGCTCCCCGAGACGAT	WT	TwoExp	id_uc010dmy.3_1151_WT	id_uc010dmy.3_1151_WT	id_uc010dmy.3_1151
ATGGGGTTCGGTATGCGCAGCAGGAGAAGCTGCTGCGCATCTGTTCCATTTATACCCAGAGTGGAGAAAACAGCCTGGTGCAGGTCGTTGAAAGGCTCCCCGAGACGAT	WT	TwoExp	id_uc004dwa.2_1611_WT	id_uc004dwa.2_1611_WT	id_uc004dwa.2_1611
ATGGGGTTCGGTATGCGCGAAGATGAGGAAGAAGATTCTAGCAACGTTGATTTACCTTACATTCCTGCTGAAAACTCACCAACAGGAACAGAAGGCTCCCCGAGACGAT	WT	TwoExp	id_uc002jbv.3_448_WT	id_uc002jbv.3_448_WT	id_uc002jbv.3_448
ATGGGGTTCGGTATGCGCACCACACCACCGCACAGGGGACAAATGGTGCATCTATCCCACCTACGACTACACACACTGCCTCTACGAGATTAAGGCTCCCCGAGACGAT	WT	Dkc1	id_uc003cvx.3_1307_WT	id_uc003cvx.3_1307_WT	id_uc003cvx.3_1307
ATGGGGTTCGGTATGCGCACCACACCACCGCACAGGGGACAAATGGTGCATCTATCCCACCTACGACTACACACACTGCCTCTACGAGATTAAGGCTCCCCGAGACGAT	WT	TwoExp	id_uc003cvx.3_1307_WT	id_uc003cvx.3_1307_WT	id_uc003cvx.3_1307
ATGGGGTTCGGTATGCGCACCACACCACCGCACAGGGGACAAATGGTGCATCTATCCCACCTACGACTACACACACTGCCTCTTCGCGCACAAGGCTCCCCGAGACGAT	WT	Dkc1	id_uc003cvx.3_1307_WT	id_uc003cvx.3_1307_WT	id_uc003cvx.3_1307
ATGGGGTTCGGTATGCGCACCACACCACCGCACAGGGGACAAATGGTGCATCTATCCCACCTACGACTACACACACTGCCTCTTCGCGCACAAGGCTCCCCGAGACGAT	WT	TwoExp	id_uc003cvx.3_1307_WT	id_uc003cvx.3_1307_WT	id_uc003cvx.3_1307
ATGGGGTTCGGTATGCGCCCAGAACAACTACGGATGGGCAACACTCCAGATTCAGCCTCAGACAACCTCGGTTTCCGCTGTGCGGCCTATCAAGGCTCCCCGAGACGAT	WT	TwoExp	id_uc003trv.3_784_WT	id_uc003trv.3_784_WT	id_uc003trv.3_784
ATGGGGTTCGGTATGCGCGATCACAGGTGCCGGGCCTGGGGCGTCGTCCGTGTGTAACAGCGCACCCGGCTCCGGCCCCAGCTTGAATAGAAAGGCTCCCCGAGACGAT	WT	Pus1	id_uc002iff.1_1265_WT	id_uc002iff.1_1265_WT	id_uc002iff.1_1265
ATGGGGTTCGGTATGCGCGAAGCTGGGTGGCTTGTTGGAGGAGGCTGTGTTCTAATCAGAAGGTCTGGGTTCAAGTCCTAGTTGACAATCGAAGGCTCCCCGAGACGAT	WT	PredictedTRUB1	id_uc002zxs.3_2719_WT	id_uc002zxs.3_2719_WT	id_uc002zxs.3_2719
ATGGGGTTCGGTATGCGCACAGTGAGAGCACAGAAAACTGAATCTGTAGATAACGAGGGAGAATGAATTGTCATGAAAAATTGTAGCTTAAAAGGCTCCCCGAGACGAT	WT	TwoExp	id_uc021zbz.1_557_WT	id_uc021zbz.1_557_WT	id_uc021zbz.1_557
ATGGGGTTCGGTATGCGCAGAAATTTTTCCATCGAGCCTTTTTAAAATTGTAGGACTTGTTCCTGTGGGCTTCAGTGATGGGATATGAGTGAAGGCTCCCCGAGACGAT	WT	TwoExp	id_uc010roh.2_5591_WT	id_uc010roh.2_5591_WT	id_uc010roh.2_5591
ATGGGGTTCGGTATGCGCCACCAAGCAGCTGTTGGCCGATATCATACAGTTCCATCCTGGGGACACCCTCAAGGAGATCCTGTGTGGGGATAAGGCTCCCCGAGACGAT	WT	PredictedTRUB1	id_uc001fpf.3_4212_WT	id_uc001fpf.3_4212_WT	id_uc001fpf.3_4212
ATGGGGTTCGGTATGCGCTTTTGAAATGTGTTTATGGAGTTTAAGAAATTTATTTTCCAGGTGCAGCCCCTGTCTAACTGAAACGGATTGAAAGGCTCCCCGAGACGAT	WT	TwoExp	id_uc003hwl.3_1851_WT	id_uc003hwl.3_1851_WT	id_uc003hwl.3_1851
ATGGGGTTCGGTATGCGCGCTGGAGCAGCTAAGGAGAGATCACAGATGAATTCTCAAACTGAAGATCATGCCTTGGCACCTGTTAGAAATGAAGGCTCCCCGAGACGAT	WT	Pus1	id_uc001wsy.1_652_WT	id_uc001wsy.1_652_WT	id_uc001wsy.1_652
ATGGGGTTCGGTATGCGCAATCAAGATAACAGATCTTGTGTATGTGGGGTTCCATGCCCACAAGGCTTCCTGTGCTACTGTTTCACGCTGTAAGGCTCCCCGAGACGAT	WT	PredictedTRUB1	id_uc001vjh.1_958_WT	id_uc001vjh.1_958_WT	id_uc001vjh.1_958
ATGGGGTTCGGTATGCGCGGCTCAAAAGCCAAGGCTGCCCCCAAAGATTGTTTCATTGAAGTGAATTCTAAAGGTGACAGATTTATGAACGAAGGCTCCCCGAGACGAT	WT	TwoExp	id_uc003xmr.3_1696_WT	id_uc003xmr.3_1696_WT	id_uc003xmr.3_1696
ATGGGGTTCGGTATGCGCTCCGGGGGAGGCCTCGCTCTGCCTGGAAGAGGTGGCCCCCCCTGCCAGTGGGACCCGCAAAGCTCACTAATTAAAGGCTCCCCGAGACGAT	WT	Dkc1	id_uc004bwv.3_1136_WT	id_uc004bwv.3_1136_WT	id_uc004bwv.3_1136
ATGGGGTTCGGTATGCGCGCCGGTGCGACGTCAACGCAGCCGGGCGAGTTTTACCGATCTGTGTTCCGCGGCCCGGCCGCGGCTGGCCCAAAAGGCTCCCCGAGACGAT	WT	Pus1	id_uc002pha.2_233_WT	id_uc002pha.2_233_WT	id_uc002pha.2_233
ATGGGGTTCGGTATGCGCACATTCACACAAACTTCAGAGACTGCCATGGTTCAAGTCCAAGCTCCTGTATCCCGTCCTGTGCTTGTTATGCAAGGCTCCCCGAGACGAT	WT	PredictedTRUB1	id_uc009wsz.1_315_WT	id_uc009wsz.1_315_WT	id_uc009wsz.1_315
ATGGGGTTCGGTATGCGCACATTCACACAAACTTCAGAGACTGCCATGGTTCAAGTCCAAGGTGAGTCACCAGCTTGGGAGTTATTGGGTGAAGGCTCCCCGAGACGAT	WT	PredictedTRUB1	id_uc010pix.1_382_WT	id_uc010pix.1_382_WT	id_uc010pix.1_382
ATGGGGTTCGGTATGCGCCTTGGCTGTCGAGGTGGAGAACCAGGGTGTGTTCCAGCCACTCCCAGGGAGGCTGCCGCCAGGCTGCGCCAACAAGGCTCCCCGAGACGAT	WT	IdentifiedTRUB1	id_uc003bxv.1_1856_WT	id_uc003bxv.1_1856_WT	id_uc003bxv.1_1856
ATGGGGTTCGGTATGCGCCTTGGCTGTCGAGGTGGAGAACCAGGGTGTGTTCCAGCCACTCCCAGGGAGGCTGCCGCCAGGCTGCGCCAACAAGGCTCCCCGAGACGAT	WT	TwoExp	id_uc003bxv.1_1856_WT	id_uc003bxv.1_1856_WT	id_uc003bxv.1_1856
ATGGGGTTCGGTATGCGCCTTGGCTGTCGAGGTGGAGAACCAGGGTGTGTTCCAGCCACTCCCAGGGAGGCTGCCGCCAGGCTCGCCAGCAAAGGCTCCCCGAGACGAT	WT	IdentifiedTRUB1	id_uc003bxv.1_1856_WT	id_uc003bxv.1_1856_WT	id_uc003bxv.1_1856
ATGGGGTTCGGTATGCGCCTTGGCTGTCGAGGTGGAGAACCAGGGTGTGTTCCAGCCACTCCCAGGGAGGCTGCCGCCAGGCTCGCCAGCAAAGGCTCCCCGAGACGAT	WT	TwoExp	id_uc003bxv.1_1856_WT	id_uc003bxv.1_1856_WT	id_uc003bxv.1_1856
ATGGGGTTCGGTATGCGCCCCTCAGATCAGCCTCTTCTACATTTTCAATTTCCTCAAGTACACCCTCTGGCCATGCCTAGTCCCCCACTTCAAGGCTCCCCGAGACGAT	WT	TwoExp	id_uc002iex.3_1178_WT	id_uc002iex.3_1178_WT	id_uc002iex.3_1178
ATGGGGTTCGGTATGCGCCGTGGCTGTGTGCCGGGACAAGATGTTTGTATTCTCTGGGCAAAGCGGAGCCAAAATAACCAACATTGAACTGAAGGCTCCCCGAGACGAT	WT	TwoExp	id_uc002zto.3_832_WT	id_uc002zto.3_832_WT	id_uc002zto.3_832
ATGGGGTTCGGTATGCGCCCGCGGCCCGCGGGGGCGACGCAGCAGCCCGCTGTCCCCGCGCCGCCGGCGGGGGAGCTGATCCAAACCAACCAAGGCTCCCCGAGACGAT	WT	CTGsites	id_uc002ffz.1_196_WT	id_uc002ffz.1_196_WT	id_uc002ffz.1_196
ATGGGGTTCGGTATGCGCCCGCGGCCCGCGGGGGCGACGCAGCAGCCCGCTGTCCCCGCGCCGCCGGCGGGGGAGCTGATCCATGTACGCCAAGGCTCCCCGAGACGAT	WT	CTGsites	id_uc002ffz.1_196_WT	id_uc002ffz.1_196_WT	id_uc002ffz.1_196
ATGGGGTTCGGTATGCGCTGGAGGCGGCGGAGCGGAAGCCCCACCATGGCTGCAATCCGAAAGAAGCTGGTGATCGTTGGGGATTTTTTGTAAGGCTCCCCGAGACGAT	WT	TwoExp	id_uc001ecr.1_340_WT	id_uc001ecr.1_340_WT	id_uc001ecr.1_340
ATGGGGTTCGGTATGCGCCGGGCGTCCTGGGAAGGGAGATCCGGAGCGAATAGGGGGCTTCGCCTCTGGCCCAGCCCTCCCGCTATTACTGAAGGCTCCCCGAGACGAT	WT	TwoExp	id_uc003ysi.3_284_WT	id_uc003ysi.3_284_WT	id_uc003ysi.3_284
ATGGGGTTCGGTATGCGCTTGGTTAGAGCAGCCAGCGGGTACAGAATGGATTTTGGAAGAGGGAGTCACCACTGGACCTCCAATTTGGGCGAAGGCTCCCCGAGACGAT	WT	TwoExp	id_uc002xuj.3_251_WT	id_uc002xuj.3_251_WT	id_uc002xuj.3_251
ATGGGGTTCGGTATGCGCGTGGTTGGCACTCCTGGTTTCCAGGACGGGGTTCAAATCCCTGCGGCGTCTTTGCTTTGACTACTATCGCCTCAAGGCTCCCCGAGACGAT	WT	PredictedTRUB1	id_uc010roh.2_8396_WT	id_uc010roh.2_8396_WT	id_uc010roh.2_8396
ATGGGGTTCGGTATGCGCGTGGTTGGCACTCCTGGTTTCCAGGACGGGGTTCAAATCCCTGCGGCGTCTTTGCTTTGACTACTATCGCCTCAAGGCTCCCCGAGACGAT	WT	Pus1	id_uc010roh.2_8396_WT	id_uc010roh.2_8396_WT	id_uc010roh.2_8396
ATGGGGTTCGGTATGCGCGTGGTTGGCACTCCTGGTTTCCAGGACGGGGTTCAAATCCCTGCGGCGTCTTTGCTTTGACTACTAGGCGCGGAAGGCTCCCCGAGACGAT	WT	PredictedTRUB1	id_uc010roh.2_8396_WT	id_uc010roh.2_8396_WT	id_uc010roh.2_8396
ATGGGGTTCGGTATGCGCGTGGTTGGCACTCCTGGTTTCCAGGACGGGGTTCAAATCCCTGCGGCGTCTTTGCTTTGACTACTAGGCGCGGAAGGCTCCCCGAGACGAT	WT	Pus1	id_uc010roh.2_8396_WT	id_uc010roh.2_8396_WT	id_uc010roh.2_8396
ATGGGGTTCGGTATGCGCCCTCCTGGGGAAGCAGGCAGATAACCCCCATGTAGCTCTTTACCAGGCCCGCTTCCCGGAGCACGAGATCTTCAAGGCTCCCCGAGACGAT	WT	TwoExp	id_uc001pux.3_408_WT	id_uc001pux.3_408_WT	id_uc001pux.3_408
ATGGGGTTCGGTATGCGCAGTGATCCCCGGGCTCTGCCCACCCTCCCCACTGCCACTTCCGGGCAGAGGCCAGCAAAGCGGCGAACTACAAAAGGCTCCCCGAGACGAT	WT	CTGsites	id_uc002nvf.3_240_WT	id_uc002nvf.3_240_WT	id_uc002nvf.3_240
ATGGGGTTCGGTATGCGCAGTGATCCCCGGGCTCTGCCCACCCTCCCCACTGCCACTTCCGGGCAGAGGCCAGCAAAGCGGCGTTCTGATTAAGGCTCCCCGAGACGAT	WT	CTGsites	id_uc002nvf.3_240_WT	id_uc002nvf.3_240_WT	id_uc002nvf.3_240
ATGGGGTTCGGTATGCGCCCGGGTTTGCAAATAGAGGCTACCGGGTGCTGTATTCAGCAACACCTGTTTTACTATTTGTTATTATTCGGAAAAGGCTCCCCGAGACGAT	WT	TwoExp	id_uc003ilu.4_9703_WT	id_uc003ilu.4_9703_WT	id_uc003ilu.4_9703
ATGGGGTTCGGTATGCGCGGTGCCGGTGGCCGCGCTCGGACCCGGTGACTTAAGAGATTAAAATTAATTTGGTTGCTGTTGGTCTGAACAAAAGGCTCCCCGAGACGAT	WT	TwoExp	id_uc021svo.1_352_WT	id_uc021svo.1_352_WT	id_uc021svo.1_352
ATGGGGTTCGGTATGCGCAACTTTTTGTAGTTCTTTGTGTAAAAAGCGTATTCTGAATTTATACACATGGCATGTTCTTCATTTCTCATGCAAGGCTCCCCGAGACGAT	WT	Pus1	id_uc021rms.1_1641_WT	id_uc021rms.1_1641_WT	id_uc021rms.1_1641
ATGGGGTTCGGTATGCGCGCCTTGTTCTTCGTCGGGAACCAGCTCATTGCTACAAGCCACACAGGGCGCATCGGGGTGTGGAAATCCTATTAAGGCTCCCCGAGACGAT	WT	TwoExp	id_uc002oob.3_956_WT	id_uc002oob.3_956_WT	id_uc002oob.3_956
ATGGGGTTCGGTATGCGCCCGGCGAAGCGCGCGGCCTGCCGTTGGCGGCCTGGTCCGCAGCGCCCTGCGCCCACCCGCCCCGGGATCTAACAAGGCTCCCCGAGACGAT	WT	CTGsites	id_uc001jmt.3_127_WT	id_uc001jmt.3_127_WT	id_uc001jmt.3_127
ATGGGGTTCGGTATGCGCCCGGCGAAGCGCGCGGCCTGCCGTTGGCGGCCTGGTCCGCAGCGCCCTGCGCCCACCCGCCCCGGTGTGTTGAAAGGCTCCCCGAGACGAT	WT	CTGsites	id_uc001jmt.3_127_WT	id_uc001jmt.3_127_WT	id_uc001jmt.3_127
ATGGGGTTCGGTATGCGCGCGCGGCGGGCGGCGGCGGCCGCGGCGGCGGCTGGGGCGTTCGCGGGCCGGCGCGCGGCGTGCGGATTTAGCAAAGGCTCCCCGAGACGAT	WT	CTGsites	id_uc001uhu.2_135_WT	id_uc001uhu.2_135_WT	id_uc001uhu.2_135
ATGGGGTTCGGTATGCGCGCGCGGCGGGCGGCGGCGGCCGCGGCGGCGGCTGGGGCGTTCGCGGGCCGGCGCGCGGCGTGCGGCTCCAGCGAAGGCTCCCCGAGACGAT	WT	CTGsites	id_uc001uhu.2_135_WT	id_uc001uhu.2_135_WT	id_uc001uhu.2_135
ATGGGGTTCGGTATGCGCTGTGGTGGTAGAATGTCCAGATGAAAGCTTCATTCAACCCATCTGTGAGAATGCCACCTTTCAGATGTGAGGGAAGGCTCCCCGAGACGAT	WT	TwoExp	id_uc002gnz.4_1068_WT	id_uc002gnz.4_1068_WT	id_uc002gnz.4_1068
ATGGGGTTCGGTATGCGCTATGCTGAGGCTGTCACTCGGGCTAAGCAGATTGTGTGGAATGGTCCTGTGGGGGTATTTGAATGATTATTTTAAGGCTCCCCGAGACGAT	WT	Pus1	id_uc004ecz.4_1175_WT	id_uc004ecz.4_1175_WT	id_uc004ecz.4_1175
ATGGGGTTCGGTATGCGCGGGGGTCCCTTCCCAGCCCGGAGGATCCCTGCTGCCTTGGTGATCCCGGGCTGACAGCCAGAGAGCGGCGCGCAAGGCTCCCCGAGACGAT	WT	CTGsites	id_uc021wdf.1_119_WT	id_uc021wdf.1_119_WT	id_uc021wdf.1_119
ATGGGGTTCGGTATGCGCGGGGGTCCCTTCCCAGCCCGGAGGATCCCTGCTGCCTTGGTGATCCCGGGCTGACAGCCAGAGAGGATAACGAAAGGCTCCCCGAGACGAT	WT	CTGsites	id_uc021wdf.1_119_WT	id_uc021wdf.1_119_WT	id_uc021wdf.1_119
ATGGGGTTCGGTATGCGCAGATTTACTTGGAGTACATGTGAAAGAAAACGTCAGTCTGCCTGTAAATTTCAGCAAGCCGTGTTGACCGTCAAAGGCTCCCCGAGACGAT	WT	TwoExp	id_uc001yoi.4_310_WT	id_uc001yoi.4_310_WT	id_uc001yoi.4_310
ATGGGGTTCGGTATGCGCAGAGCCCGAGCCCAGCACATTGTGCCCTGTACTATATCTCAGCTGCTTTCTGCCACTTTGGTTGAAGAAAGATAAGGCTCCCCGAGACGAT	WT	TwoExp	id_uc001bpe.1_433_WT	id_uc001bpe.1_433_WT	id_uc001bpe.1_433
ATGGGGTTCGGTATGCGCCTAAAAACTATGGCTCTCCACTCATCAGTGGTTCCACTCCAAAGCATGAGCGTGGCTCTCCCAGCAAGGCCGTAAGGCTCCCCGAGACGAT	WT	TwoExp	id_uc002hrv.4_4528_WT	id_uc002hrv.4_4528_WT	id_uc002hrv.4_4528
ATGGGGTTCGGTATGCGCCTAAAAACTATGGCTCTCCACTCATCAGTGGTTCCACTCCAAAGCATGAGCGTGGCTCTCCCAGCAAGGCCGTAAGGCTCCCCGAGACGAT	WT	IdentifiedTRUB1	id_uc002hrv.4_4528_WT	id_uc002hrv.4_4528_WT	id_uc002hrv.4_4528
ATGGGGTTCGGTATGCGCCTAAAAACTATGGCTCTCCACTCATCAGTGGTTCCACTCCAAAGCATGAGCGTGGCTCTCCCAGCTTCGAATGAAGGCTCCCCGAGACGAT	WT	TwoExp	id_uc002hrv.4_4528_WT	id_uc002hrv.4_4528_WT	id_uc002hrv.4_4528
ATGGGGTTCGGTATGCGCCTAAAAACTATGGCTCTCCACTCATCAGTGGTTCCACTCCAAAGCATGAGCGTGGCTCTCCCAGCTTCGAATGAAGGCTCCCCGAGACGAT	WT	IdentifiedTRUB1	id_uc002hrv.4_4528_WT	id_uc002hrv.4_4528_WT	id_uc002hrv.4_4528
ATGGGGTTCGGTATGCGCTTCAGGACTCTGCCTTCAGGAACACGGGTCTGTAGAGGGTCTGCTGGAGACGCCTGAAAGACAGTAGATTGGGAAGGCTCCCCGAGACGAT	WT	TwoExp	id_uc003nxq.4_1468_WT	id_uc003nxq.4_1468_WT	id_uc003nxq.4_1468
ATGGGGTTCGGTATGCGCTCCTGCTTCGGGCCTGGGCCGAGGGCCTTGTGTAGGCCATGTTCCTCGGGCAGCTGCCCCGGGCCTTGAGGAAAAGGCTCCCCGAGACGAT	WT	TwoExp	id_uc001zmr.1_600_WT	id_uc001zmr.1_600_WT	id_uc001zmr.1_600
ATGGGGTTCGGTATGCGCCAGAAATGTCAGGGAGCAAGGCCTCAGCGACCTGGCATGTCACCAGGGAACCGGATGCCCATGGCGAGCGTTCAAGGCTCCCCGAGACGAT	WT	CTGsites	id_uc010wpt.1_126_WT	id_uc010wpt.1_126_WT	id_uc010wpt.1_126
ATGGGGTTCGGTATGCGCCAGAAATGTCAGGGAGCAAGGCCTCAGCGACCTGGCATGTCACCAGGGAACCGGATGCCCATGGCCTAAGATCAAGGCTCCCCGAGACGAT	WT	CTGsites	id_uc010wpt.1_126_WT	id_uc010wpt.1_126_WT	id_uc010wpt.1_126
ATGGGGTTCGGTATGCGCAGGACATGATGAAGAAGCTGTGGGGTGACAGGTACTTTGACCCAGCCAACGGCAAGTTCAGCAAGTTCGAAGAAAGGCTCCCCGAGACGAT	WT	TwoExp	id_uc002lze.3_877_WT	id_uc002lze.3_877_WT	id_uc002lze.3_877
ATGGGGTTCGGTATGCGCCATGGCAGCTCAGAAATGTTGCCTGACCTACTTTGAGGAGATGATTTGAGCGAAACACCCATTCTTTTCATTCAAGGCTCCCCGAGACGAT	WT	Pus1	id_uc001brp.1_266_WT	id_uc001brp.1_266_WT	id_uc001brp.1_266
ATGGGGTTCGGTATGCGCGCCTGTGGTAGCTTTTCAAGCTGGCTCCTTTCTAGCCTCACGTCCCCGGCAGACTCCTTTTGCCGTATATATTAAGGCTCCCCGAGACGAT	WT	TwoExp	id_uc001ner.1_1778_WT	id_uc001ner.1_1778_WT	id_uc001ner.1_1778
ATGGGGTTCGGTATGCGCGGACTCAACCCAGTTACCTCACATGGGGCCTTTTCTGAGCAAGGTCTCGAAAGCGCAGGCCGCCCCACTTGATAAGGCTCCCCGAGACGAT	WT	TwoExp	id_uc004cdj.3_1876_WT	id_uc004cdj.3_1876_WT	id_uc004cdj.3_1876
ATGGGGTTCGGTATGCGCCTTTCCGCTCCCAGGGGCGTTGGGAACGGTTGTAGGACGTGGCTCTTTATTCGTGAGTTTTCCATGATTGTGCAAGGCTCCCCGAGACGAT	WT	TwoExp	id_uc001qrw.1_6086_WT	id_uc001qrw.1_6086_WT	id_uc001qrw.1_6086
ATGGGGTTCGGTATGCGCAAGCATGCACACATGGAGACGGCGCCTGCCTGTAGATGTTTGGATCTTCGAGATCTCCCCAGGCAGCAGCGTCAAGGCTCCCCGAGACGAT	WT	TwoExp	id_uc001xlt.2_3551_WT	id_uc001xlt.2_3551_WT	id_uc001xlt.2_3551
ATGGGGTTCGGTATGCGCGGGGCGCCGGGGGCTCCGCACGGACCATGTATTTTCTGAGCGGCTGGCCCAAGAGGCTGCTGTGCACCGGGTGAAGGCTCCCCGAGACGAT	WT	TwoExp	id_uc003zji.3_199_WT	id_uc003zji.3_199_WT	id_uc003zji.3_199
ATGGGGTTCGGTATGCGCCCAAGGCAGGCAGATCGCCTGAGGTCAGGAGTTCCAGACCAGCCTGACCAACGTGGAGAAATCCCGGCCCTGAAAGGCTCCCCGAGACGAT	WT	PredictedTRUB1	id_uc001azu.2_1131_WT	id_uc001azu.2_1131_WT	id_uc001azu.2_1131
ATGGGGTTCGGTATGCGCCACCCAGCCGGCATAGAGCCCACGCCCACCCTTACCCTCACTGGCCATGATGAGTTTGGCCGATTTTCCATTCAAGGCTCCCCGAGACGAT	WT	TwoExp	id_uc001sga.3_1212_WT	id_uc001sga.3_1212_WT	id_uc001sga.3_1212
ATGGGGTTCGGTATGCGCTGTTCAGAATGTACGGAAAGATGATCAGCTATTTTCAACATAACTGAAGGCATATGCTGGCCCATCACGGACAAAGGCTCCCCGAGACGAT	WT	Pus1	id_uc003ocg.3_2873_WT	id_uc003ocg.3_2873_WT	id_uc003ocg.3_2873
ATGGGGTTCGGTATGCGCGGTCACAGTGCTGAGGGGGCTTGAGTCCCACCTTTCAGCTTGATGGATGCTCACCTCTTCTCAGCAACTAACCAAGGCTCCCCGAGACGAT	WT	TwoExp	id_uc002slt.2_1997_WT	id_uc002slt.2_1997_WT	id_uc002slt.2_1997
ATGGGGTTCGGTATGCGCGAGCCAAGAGCAGGCAAAGAGGAATCTGGAGTTTCAGTCTCCAACTCTCAGCCCACCAATGAAAGCCACCTCAAAGGCTCCCCGAGACGAT	WT	TwoExp	id_uc003owy.1_939_WT	id_uc003owy.1_939_WT	id_uc003owy.1_939
ATGGGGTTCGGTATGCGCGAGAAGCCCTTTGCCTGCGAGGTCTGCGGTGTTCGATTCACCAGGAACGACAAGCTGAAGATCCACATCATCTAAGGCTCCCCGAGACGAT	WT	IdentifiedTRUB1	id_uc001fgj.4_1531_WT	id_uc001fgj.4_1531_WT	id_uc001fgj.4_1531
ATGGGGTTCGGTATGCGCGAGAAGCCCTTTGCCTGCGAGGTCTGCGGTGTTCGATTCACCAGGAACGACAAGCTGAAGATCCACATCATCTAAGGCTCCCCGAGACGAT	WT	TwoExp	id_uc001fgj.4_1531_WT	id_uc001fgj.4_1531_WT	id_uc001fgj.4_1531
ATGGGGTTCGGTATGCGCGAGAAGCCCTTTGCCTGCGAGGTCTGCGGTGTTCGATTCACCAGGAACGACAAGCTGAAGATCCAAAGTGTTCAAGGCTCCCCGAGACGAT	WT	IdentifiedTRUB1	id_uc001fgj.4_1531_WT	id_uc010peq.2_1608_WT	id_uc010peq.2_1608
ATGGGGTTCGGTATGCGCGAGAAGCCCTTTGCCTGCGAGGTCTGCGGTGTTCGATTCACCAGGAACGACAAGCTGAAGATCCAAAGTGTTCAAGGCTCCCCGAGACGAT	WT	TwoExp	id_uc001fgj.4_1531_WT	id_uc010peq.2_1608_WT	id_uc010peq.2_1608
ATGGGGTTCGGTATGCGCGGAAGCCCCAGTAGGAGGGAGCTTCAGACAGTTCAATTCTGGCCTGTCTTCCTTCCCTGCACCGGGCCGACAAAAGGCTCCCCGAGACGAT	WT	PredictedTRUB1	id_uc002bed.1_1840_WT	id_uc002bed.1_1840_WT	id_uc002bed.1_1840
ATGGGGTTCGGTATGCGCTTCCCTCCATGGTTTCTCTCCGCTCCCGTGAGTAACTTGGCTCCGGGGGCTCCGCTCGCCTGCCCACGAAGTAAAGGCTCCCCGAGACGAT	WT	TwoExp	id_uc004aya.3_171_WT	id_uc004aya.3_171_WT	id_uc004aya.3_171
ATGGGGTTCGGTATGCGCCGTGGCCTGCCTTGCACCCCCTGCAGGCTCCGTGCTCTATCACCTCTTTATGTGCCACCAAGGGGTGAATTAGAAGGCTCCCCGAGACGAT	WT	TwoExp	id_uc002csj.4_625_WT	id_uc002csj.4_625_WT	id_uc002csj.4_625
ATGGGGTTCGGTATGCGCTCGAAGGTGGGCAGGTCCCACCTTGTGGAGGATGGAGGTGACCGGGGACGCCGGGGTACCAGAATAACCCTAAAAGGCTCCCCGAGACGAT	WT	Dkc1	id_uc001arj.3_101_WT	id_uc001arj.3_101_WT	id_uc001arj.3_101
ATGGGGTTCGGTATGCGCATGTCACTGACTCTAAATCAGGCGAGAACCACTGTCTCTGATCAACGTGCGGAAGAGGAACGTGGTGAGTAATAAGGCTCCCCGAGACGAT	WT	CTGsites	id_uc010tbr.2_525_WT	id_uc010tbr.2_525_WT	id_uc010tbr.2_525
ATGGGGTTCGGTATGCGCATGTCACTGACTCTAAATCAGGCGAGAACCACTGTCTCTGATCAACGTGCGGAAGAGGAACGTGGGCTGCTTTAAGGCTCCCCGAGACGAT	WT	CTGsites	id_uc010tbr.2_525_WT	id_uc010tbr.2_525_WT	id_uc010tbr.2_525
ATGGGGTTCGGTATGCGCCCGAGGTGGGTGGATCACTTGAGGTCAGGAGTTCAAGACCAGCCTGGCCAACATGGTGAAACCCCAAAGTCGGAAGGCTCCCCGAGACGAT	WT	PredictedTRUB1	id_uc003jes.3_1882_WT	id_uc003jes.3_1882_WT	id_uc003jes.3_1882
ATGGGGTTCGGTATGCGCGTGATAACAGCGTGGGGGTGCTCTTCAATGACTCAACACGCCTCATCCTCTACAATGATGGTGACTTCTACACAAGGCTCCCCGAGACGAT	WT	TwoExp	id_uc002dlz.1_1369_WT	id_uc002dlz.1_1369_WT	id_uc002dlz.1_1369
ATGGGGTTCGGTATGCGCTGGGAGCTCGCCCTTTTCGGCTGGAGTCGGGCTTTACGGCGCCGGATGGCTCTGGACGTGAAGTCGCGAGCGGAAGGCTCCCCGAGACGAT	WT	TwoExp	id_uc003jvs.4_170_WT	id_uc003jvs.4_170_WT	id_uc003jvs.4_170
ATGGGGTTCGGTATGCGCCCTGGACACGTGGTCCCTTGTGCTGGAGAAGTTCCAGTCTTTAGTCTTGCCCTATTTGCAGAGTGGTGACAGCAAGGCTCCCCGAGACGAT	WT	PredictedTRUB1	id_uc001hts.1_1699_WT	id_uc001hts.1_1699_WT	id_uc001hts.1_1699
ATGGGGTTCGGTATGCGCCCAGCCCAACTCAGCCACTATAAAAACTGAGTTCAACTCTCTGTGCCAGGTGTTGGGGATACACATCCTCTACAAGGCTCCCCGAGACGAT	WT	PredictedTRUB1	id_uc002bkv.2_559_WT	id_uc002bkv.2_559_WT	id_uc002bkv.2_559
ATGGGGTTCGGTATGCGCAGAGGAGCTCACCTACCTTATTGAGGCCCTGTTCAAGACAGAGGTGCTGCCCGGCCAGCTGGGCTTCACGCGCAAGGCTCCCCGAGACGAT	WT	PredictedTRUB1	id_uc001jez.3_2316_WT	id_uc001jez.3_2316_WT	id_uc001jez.3_2316
ATGGGGTTCGGTATGCGCGAGGTGGACACTCCTAGGGGCTTTTCTAAAGCTAGACTCGCAGCTCCTTGCTCAGGAAAATTAAATGCCCGGCAAGGCTCCCCGAGACGAT	WT	TwoExp	id_uc021xvv.1_952_WT	id_uc021xvv.1_952_WT	id_uc021xvv.1_952
ATGGGGTTCGGTATGCGCTCTAGTTGCTTGACCCTGCCACATGGGTCCAGTGTTCATCTGAGCATAACTGTACTAAATCCTTTGGAACCTCAAGGCTCCCCGAGACGAT	WT	TwoExp	id_uc001knh.3_1653_WT	id_uc001knh.3_1653_WT	id_uc001knh.3_1653
ATGGGGTTCGGTATGCGCCCCCCTCCTGACTGTCATTGTCGCCCAGCAGCTGACCATGCCACTGCCTCGGTACGGCTCCGGGCAGGATCAAAAGGCTCCCCGAGACGAT	WT	CTGsites	id_uc011mch.2_663_WT	id_uc011mch.2_663_WT	id_uc011mch.2_663
ATGGGGTTCGGTATGCGCCCCCCTCCTGACTGTCATTGTCGCCCAGCAGCTGACCATGCCACTGCCTCGGTACGGCTCCGGGCCGTCATCCAAGGCTCCCCGAGACGAT	WT	CTGsites	id_uc011mch.2_663_WT	id_uc011mch.2_663_WT	id_uc011mch.2_663
ATGGGGTTCGGTATGCGCCCACGTTTGACAACTTCCTGAGATGGCACAGTTCTAACCTGGGGAAAAAGATCCACGACCATGCTCTATGTAGAAGGCTCCCCGAGACGAT	WT	PredictedTRUB1	id_uc003xdz.2_1107_WT	id_uc003xdz.2_1107_WT	id_uc003xdz.2_1107
ATGGGGTTCGGTATGCGCGTCATGAATGAGTCTGAAGATCTATTCAGCCTTATCGAAACACATGAAGCAAAACCATTGAAACTTGAAGTTGAAGGCTCCCCGAGACGAT	WT	TwoExp	id_uc002ugj.3_517_WT	id_uc002ugj.3_517_WT	id_uc002ugj.3_517
ATGGGGTTCGGTATGCGCATCGAGGACCTCTCAGGCCCCTACATCTGGGTTCCAGCCCGAGAGAGACTCTGATTCCTGCCCTGTCTACAACAAGGCTCCCCGAGACGAT	WT	PredictedTRUB1	id_uc002get.4_3485_WT	id_uc002get.4_3485_WT	id_uc002get.4_3485
ATGGGGTTCGGTATGCGCGCTGGAGTTCCTGCGACCCGCTGTGCAGCAGCTCGACTCTCACGTACACGCCGTCAGAGAGAGCCACCGCAAGAAGGCTCCCCGAGACGAT	WT	Dkc1	id_uc001fcq.3_195_WT	id_uc001fcq.3_195_WT	id_uc001fcq.3_195
ATGGGGTTCGGTATGCGCTCTCCTTCCACCCTCTGGTTCCAATTTCCTGTTCTAAGCAGGACTAGGGCCCAGGAGGCTAAGGCTGGTACGTAAGGCTCCCCGAGACGAT	WT	IdentifiedTRUB1	id_uc001bzv.2_3271_WT	id_uc001bzv.2_3271_WT	id_uc001bzv.2_3271
ATGGGGTTCGGTATGCGCCTCTGTCCTAGCTCAGGTCTGGGTGCCATTCTTTACACTCGTGTGCTCGCTCACGCACACATCACGCACGACGAAGGCTCCCCGAGACGAT	WT	TwoExp	id_uc002bhv.4_1237_WT	id_uc002bhv.4_1237_WT	id_uc002bhv.4_1237
ATGGGGTTCGGTATGCGCTTCTTTGTTCTGCAGAGCTGTCCTTTGCACTGTAGGAGATTTACTAATATCCCTGGCCTCTACCCATGCGGGAAAGGCTCCCCGAGACGAT	WT	TwoExp	id_uc021qdx.1_4980_WT	id_uc021qdx.1_4980_WT	id_uc021qdx.1_4980
ATGGGGTTCGGTATGCGCCTGTGAAAGTGAAGAATTAGTACAGCTGTGTTTTTTAAAGCCACCTCTCTGTCTCCACCCCATGGTTTTAACGAAGGCTCCCCGAGACGAT	WT	TwoExp	id_uc003tlr.3_3791_WT	id_uc003tlr.3_3791_WT	id_uc003tlr.3_3791
ATGGGGTTCGGTATGCGCTGTACTTCCACGTGACTGGGTGCTGAGGGGAGTTAAAGCCTCCCTGGTGCCAGCCCCAGTGCTTGCCAGCGGCAAGGCTCCCCGAGACGAT	WT	Pus1	id_uc003dut.3_3626_WT	id_uc003dut.3_3626_WT	id_uc003dut.3_3626
ATGGGGTTCGGTATGCGCGCCATGGATGTGGCCGGAGAACAGCAGCTGGATGTGGAACACAACCTGTTCAAGCAACGACTAGAGCTAACTCAAGGCTCCCCGAGACGAT	WT	TwoExp	id_uc002xcs.3_364_WT	id_uc002xcs.3_364_WT	id_uc002xcs.3_364
ATGGGGTTCGGTATGCGCAAACAGTCCTGGAAAAATATGGTGAGAATGGTTTAATTCCGGTCTTCACATATTCTAAAAAATTTTTTACTGTAAGGCTCCCCGAGACGAT	WT	Pus1	id_uc001xgi.3_1515_WT	id_uc001xgi.3_1515_WT	id_uc001xgi.3_1515
ATGGGGTTCGGTATGCGCAGCGTGGTGCTAATAACGCCAAGGTCGCGGGTTCGAACCCCGTACGGGCCAGTGGGTGGCTTTTTGGCGCTGTAAGGCTCCCCGAGACGAT	WT	PredictedTRUB1	id_uc002gkq.4_4885_WT	id_uc002gkq.4_4885_WT	id_uc002gkq.4_4885
ATGGGGTTCGGTATGCGCTTTCTTGAAAGATTAAGTAATTTTATTTTAGTTCCATTCTAGAATGTTGGGGAGTGGGGCACAAGTTTCCCGGAAGGCTCCCCGAGACGAT	WT	PredictedTRUB1	id_uc002yms.3_1141_WT	id_uc002yms.3_1141_WT	id_uc002yms.3_1141
ATGGGGTTCGGTATGCGCTCTCTAGCTGGTCTGGGGATAGCTGGAGCACTTACTCAGGTGGCTGGTGAAATGACACCTCAGAACCCAGAGGAAGGCTCCCCGAGACGAT	WT	TwoExp	id_uc001ttk.1_1112_WT	id_uc001ttk.1_1112_WT	id_uc001ttk.1_1112
ATGGGGTTCGGTATGCGCACGCTGGTAGTGAACCCTTGGCTCACTCAAGTTCGAATCTTTCATCAACTCAGATACAATAAGTCACACCCATAAGGCTCCCCGAGACGAT	WT	PredictedTRUB1	id_uc002ues.3_13168_WT	id_uc002ues.3_13168_WT	id_uc002ues.3_13168
ATGGGGTTCGGTATGCGCCCTTCTTGGATACCACAGCCAATTCAAACTGTTCAACCCAGTCCTTTTCCTGAGGGAACCGCTTCTGTTGAAAAAGGCTCCCCGAGACGAT	WT	PredictedTRUB1	id_uc003qmu.1_2130_WT	id_uc003qmu.1_2130_WT	id_uc003qmu.1_2130
ATGGGGTTCGGTATGCGCAAACTCATTTGGCAGCAGAGGTGAGACGAAGCTTCACAAAAGATGTCTAAGCAACAGCCAACTCACTCTGTGCAAGGCTCCCCGAGACGAT	WT	TwoExp	id_uc002wbc.3_413_WT	id_uc002wbc.3_413_WT	id_uc002wbc.3_413
ATGGGGTTCGGTATGCGCAATTACTGAAATAGGAGGGTGGCAAGAACAGTTCTATCCTGGTGCCTTACGAATAAAAAACTGGATCCTGATGAAGGCTCCCCGAGACGAT	WT	PredictedTRUB1	id_uc001tse.3_2945_WT	id_uc001tse.3_2945_WT	id_uc001tse.3_2945
ATGGGGTTCGGTATGCGCGGGCAGGATGGTTCTGTGGTGCAGTTTAAGATTAAGAGGCATACACCACTTAGTAAACTAATGAAGGGTTCAAAAGGCTCCCCGAGACGAT	WT	TwoExp	id_uc002jne.3_272_WT	id_uc002jne.3_272_WT	id_uc002jne.3_272
ATGGGGTTCGGTATGCGCAGCAAGGGCTTGGAGATCCGAAAGACCTGTGTTCCAACCCTGGCTCCAATACTCCGAGCTACGGACTTGGATTAAGGCTCCCCGAGACGAT	WT	PredictedTRUB1	id_uc001mvq.2_1186_WT	id_uc001mvq.2_1186_WT	id_uc001mvq.2_1186
ATGGGGTTCGGTATGCGCCCATGGCGGCGGCACTGAAGTGTCTACTGACATTAGGAAGATGGTGCCCCGGCCTTGGAGTGGCTTCTCTCCGAAGGCTCCCCGAGACGAT	WT	TwoExp	id_uc001vyo.3_229_WT	id_uc001vyo.3_229_WT	id_uc001vyo.3_229
ATGGGGTTCGGTATGCGCTTAATGTAGCCTGCCTCTATTTGTTGGGCAGGTAATTTCAAAGGGTTATTTGCCTCATCTCCTATGTGACTAGAAGGCTCCCCGAGACGAT	WT	TwoExp	id_uc002rsk.3_1531_WT	id_uc002rsk.3_1531_WT	id_uc002rsk.3_1531
ATGGGGTTCGGTATGCGCGGCCGGCGCCGCCATGGCGGCCGTGTTTGATTTGGATTTGGAGACGGAGGAAGGCAGCGAGGGCGAGGGACTGAAGGCTCCCCGAGACGAT	WT	Dkc1	id_uc001old.3_103_WT	id_uc001old.3_103_WT	id_uc001old.3_103
ATGGGGTTCGGTATGCGCGATTTTCTCCATTTGTCATCGTTCCCCACCCCTTCGACATGCTGCCAGGAAACAAGGGAAGGGGCATACGAAGAAGGCTCCCCGAGACGAT	WT	Dkc1	id_uc002jts.4_2008_WT	id_uc002jts.4_2008_WT	id_uc002jts.4_2008
ATGGGGTTCGGTATGCGCCATTGGGAGAAGTTCACCTTTATTGAGAAGTGTAACAACCCTCGTTCTGTCACATTATTGATCAAATCATTGAAAGGCTCCCCGAGACGAT	WT	TwoExp	id_uc003tug.3_951_WT	id_uc003tug.3_951_WT	id_uc003tug.3_951
ATGGGGTTCGGTATGCGCTCGCACTGGCTGGCACATTCCACTACTACAGCTGCGAGAGAGCCAAAAAGGCCATGGGCTACCAGGCAATTTGAAGGCTCCCCGAGACGAT	WT	TwoExp	id_uc004fgs.1_1213_WT	id_uc004fgs.1_1213_WT	id_uc004fgs.1_1213
ATGGGGTTCGGTATGCGCCACCGACCTCAAGGTGGCCAGCGACACACAGTTCTACCCTGGCCTCGGGCTGGCCCTGGCCTTCCCTTCCCTGAAGGCTCCCCGAGACGAT	WT	IdentifiedTRUB1	id_uc002lqd.1_1279_WT	id_uc002lqd.1_1279_WT	id_uc002lqd.1_1279
ATGGGGTTCGGTATGCGCCACCGACCTCAAGGTGGCCAGCGACACACAGTTCTACCCTGGCCTCGGGCTGGCCCTGGCCTTCCCTTCCCTGAAGGCTCCCCGAGACGAT	WT	TwoExp	id_uc002lqd.1_1279_WT	id_uc002lqd.1_1279_WT	id_uc002lqd.1_1279
ATGGGGTTCGGTATGCGCCACCGACCTCAAGGTGGCCAGCGACACACAGTTCTACCCTGGCCTCGGGCTGGCCCTGGCCTTCCAACGGACAAAGGCTCCCCGAGACGAT	WT	IdentifiedTRUB1	id_uc002lqd.1_1279_WT	id_uc002lqd.1_1279_WT	id_uc002lqd.1_1279
ATGGGGTTCGGTATGCGCCACCGACCTCAAGGTGGCCAGCGACACACAGTTCTACCCTGGCCTCGGGCTGGCCCTGGCCTTCCAACGGACAAAGGCTCCCCGAGACGAT	WT	TwoExp	id_uc002lqd.1_1279_WT	id_uc002lqd.1_1279_WT	id_uc002lqd.1_1279
ATGGGGTTCGGTATGCGCGTCGGGGCCAGGTTCTCACACCATCCAGATAATGTATGGCTGCGACGTGGGGTCGGACGGGCGCTTGTTAGCTAAGGCTCCCCGAGACGAT	WT	TwoExp	id_uc003nok.3_691_WT	id_uc003nok.3_691_WT	id_uc003nok.3_691
ATGGGGTTCGGTATGCGCAGTTTCTAACTTTTACTTGCTTTTTCCAGAGTTATTTATACCAAATCCTACAGGGGATTGTGTTTGCCTAGCTAAGGCTCCCCGAGACGAT	WT	TwoExp	id_uc010qii.2_2749_WT	id_uc010qii.2_2749_WT	id_uc010qii.2_2749
ATGGGGTTCGGTATGCGCGGCTGGTTACTTGCATAGACTATCAGACTTTGTTTGATCCAAAGTCGAATCCTCTCTTCACACCAATAAGTCTAAGGCTCCCCGAGACGAT	WT	TwoExp	id_uc003eps.3_2009_WT	id_uc003eps.3_2009_WT	id_uc003eps.3_2009
ATGGGGTTCGGTATGCGCAAGGCTCGGAGGCCGCGAGGCCTTCGCTGGAGTTTCGCCGCCGCAGTCTTCGCCACCATGCCGCCGAAGAGTTAAGGCTCCCCGAGACGAT	WT	Pus1	id_uc001omf.3_226_WT	id_uc001omf.3_226_WT	id_uc001omf.3_226
ATGGGGTTCGGTATGCGCGGTGGTTAGGGGCCACTTTTCCTTTGAGGCTCTAGTGGAGGTGGATGTCCTTCTCTGCCAGGCTTGATATTTCAAGGCTCCCCGAGACGAT	WT	TwoExp	id_uc001nqg.3_2198_WT	id_uc001nqg.3_2198_WT	id_uc001nqg.3_2198
ATGGGGTTCGGTATGCGCGCTTTCAATATTTCCCACGTCAGTAACAAGGTTCGAATCCTAGAACTCCTTCCAGCTCTTACAACAGTTGTCGAAGGCTCCCCGAGACGAT	WT	TwoExp	id_uc001zwx.2_8721_WT	id_uc001zwx.2_8721_WT	id_uc001zwx.2_8721
ATGGGGTTCGGTATGCGCGCTTTCAATATTTCCCACGTCAGTAACAAGGTTCGAATCCTAGAACTCCTTCCAGCTCTTACAACAGTTGTCGAAGGCTCCCCGAGACGAT	WT	IdentifiedTRUB1	id_uc001zwx.2_8721_WT	id_uc001zwx.2_8721_WT	id_uc001zwx.2_8721
ATGGGGTTCGGTATGCGCGCTTTCAATATTTCCCACGTCAGTAACAAGGTTCGAATCCTAGAACTCCTTCCAGCTCTTACAACGGTCGGTAAAGGCTCCCCGAGACGAT	WT	TwoExp	id_uc001zwx.2_8721_WT	id_uc001zwx.2_8721_WT	id_uc001zwx.2_8721
ATGGGGTTCGGTATGCGCGCTTTCAATATTTCCCACGTCAGTAACAAGGTTCGAATCCTAGAACTCCTTCCAGCTCTTACAACGGTCGGTAAAGGCTCCCCGAGACGAT	WT	IdentifiedTRUB1	id_uc001zwx.2_8721_WT	id_uc001zwx.2_8721_WT	id_uc001zwx.2_8721
ATGGGGTTCGGTATGCGCTTTCTAAAGGAATAGAACCATCTTCAGAAGGTTCCAAACCTTTATCAAATCCTTCAAGTCCTGGCCCAGTCTGAAGGCTCCCCGAGACGAT	WT	PredictedTRUB1	id_uc010ezu.3_3118_WT	id_uc010ezu.3_3118_WT	id_uc010ezu.3_3118
ATGGGGTTCGGTATGCGCGCCTGCCGGAAGGGCAGGCATATGGGCATAGGTAAGCGGAAGGGTACAGCCAATGCCCGAATGCCGGAGTAGAAAGGCTCCCCGAGACGAT	WT	TwoExp	id_uc011klk.1_702_WT	id_uc011klk.1_702_WT	id_uc011klk.1_702
ATGGGGTTCGGTATGCGCCTGCCCAGCAAGGCTGACCGCACTGAGGTAGTTCAAACCTTATGGCGTAAGACAGGTCATTTCCTTATAGTACAAGGCTCCCCGAGACGAT	WT	PredictedTRUB1	id_uc001vym.3_1041_WT	id_uc001vym.3_1041_WT	id_uc001vym.3_1041
ATGGGGTTCGGTATGCGCGATGAAAAATTACTAATGAAACTGTGTGTACGTGTCTGTGCGTGCAACATAAAAATACAGTAGCACCATCGTAAAGGCTCCCCGAGACGAT	WT	TwoExp	id_uc001nxn.3_4810_WT	id_uc001nxn.3_4810_WT	id_uc001nxn.3_4810
ATGGGGTTCGGTATGCGCCGCTGTGGAAGAATTTGTGCCGGGAGATGTGTTCCACCCACCTCCCTGTTTTGCTGTGCTCAGGCGTAGCCGGAAGGCTCCCCGAGACGAT	WT	PredictedTRUB1	id_uc002een.3_256_WT	id_uc002een.3_256_WT	id_uc002een.3_256
ATGGGGTTCGGTATGCGCCTTTGGCCCCTCCCAGGCCATCAGTCTGCACTTGAAATCCCCAGGGCCTGAAACCTACTCCACCTAAGCCTGGAAGGCTCCCCGAGACGAT	WT	TwoExp	id_uc001orw.3_774_WT	id_uc001orw.3_774_WT	id_uc001orw.3_774
ATGGGGTTCGGTATGCGCCGCGACGCCGCCGCCTTAGAACGCCTTTCCAGTACTGCTAGCAGCAGCCCGACCACGCGTTACCGGTCGAGCAAAGGCTCCCCGAGACGAT	WT	TwoExp	id_uc001rpg.3_130_WT	id_uc001rpg.3_130_WT	id_uc001rpg.3_130
ATGGGGTTCGGTATGCGCGGTGGTTAGTACTAATTTGTAGATATTTTTGTTCTACACCCTGAATATTCTACCCCTGGCCCAGATCGTGGCAAAGGCTCCCCGAGACGAT	WT	PredictedTRUB1	id_uc001ryy.2_2536_WT	id_uc001ryy.2_2536_WT	id_uc001ryy.2_2536
ATGGGGTTCGGTATGCGCCCGCGGGCGGCGGCGGCAGCGGTTGGAGGTTGTAGGACCGGCGAGGAATAGGAATCATGGCGGCTGTCGCGGTAAGGCTCCCCGAGACGAT	WT	TwoExp	id_uc002loz.3_76_WT	id_uc002loz.3_76_WT	id_uc002loz.3_76
ATGGGGTTCGGTATGCGCGGAGAGGAGGTAGAAGAAACCGAACTGATGGGTTTCGTGGATGATCAGCAGACTTTCTTCTGTGGGACCGTCGAAGGCTCCCCGAGACGAT	WT	TwoExp	id_uc001nrc.4_1577_WT	id_uc001nrc.4_1577_WT	id_uc001nrc.4_1577
ATGGGGTTCGGTATGCGCCACTTGTGCAATCCAGATGGGTGAAAGTGAGTTCCACTCTCACACACAAACAACGCTGTTCCATAAAATACTAAAGGCTCCCCGAGACGAT	WT	PredictedTRUB1	id_uc002roi.3_1323_WT	id_uc002roi.3_1323_WT	id_uc002roi.3_1323
ATGGGGTTCGGTATGCGCTCTTATTCCACTGGTTTCTTTAGCAGGACTGTTCTACTCAGCCTCTGTGGAAGAAAACTTCCCACGCCTGGTGAAGGCTCCCCGAGACGAT	WT	PredictedTRUB1	id_uc003hru.1_610_WT	id_uc003hru.1_610_WT	id_uc003hru.1_610
ATGGGGTTCGGTATGCGCATATATACACATGCGTCTATCCATACTGTGCTTTTATCTGTGATTTTCTCGCTGAAACCATGTTTCGCTCTCGAAGGCTCCCCGAGACGAT	WT	Pus1	id_uc002lvy.3_2840_WT	id_uc002lvy.3_2840_WT	id_uc002lvy.3_2840
ATGGGGTTCGGTATGCGCCATTGGCGTCTTTCTCACAAAGGCCAGCAATTTGGGCCTCGGGTCTGGTGCAGTATCATAGTAGAGTAGCTTTAAGGCTCCCCGAGACGAT	WT	Dkc1	id_uc010whv.2_1488_WT	id_uc010whv.2_1488_WT	id_uc010whv.2_1488
ATGGGGTTCGGTATGCGCCGGGGCCGCGGGCAACGGCGCGGTCCGGGGGCTGCGGGTGGACGGGCTGCCCCCGCTGCCAAAGAGACCTAGGAAGGCTCCCCGAGACGAT	WT	CTGsites	id_uc001hui.2_95_WT	id_uc001hui.2_95_WT	id_uc001hui.2_95
ATGGGGTTCGGTATGCGCCGGGGCCGCGGGCAACGGCGCGGTCCGGGGGCTGCGGGTGGACGGGCTGCCCCCGCTGCCAAAGACGAATACTAAGGCTCCCCGAGACGAT	WT	CTGsites	id_uc001hui.2_95_WT	id_uc001hui.2_95_WT	id_uc001hui.2_95
ATGGGGTTCGGTATGCGCGGGGTGTCAACGAGCTGGCAAACTATGGGGAGTACTCAGGCGCCCCCAGCGAGCAGCAGACCTATGGTTCTCCAAGGCTCCCCGAGACGAT	WT	TwoExp	id_uc002hyg.3_1083_WT	id_uc002hyg.3_1083_WT	id_uc002hyg.3_1083
ATGGGGTTCGGTATGCGCGCCTAATGAAAAGGGGTTCTAGTTGAGCTCTGTAGATAAATGCCTTGTTTCAGTGTGGTTGGAGAACACCTAGAAGGCTCCCCGAGACGAT	WT	TwoExp	id_uc001eve.3_951_WT	id_uc001eve.3_951_WT	id_uc001eve.3_951
ATGGGGTTCGGTATGCGCCAGCCCTGATGATGGAGGGGCTGCTCAGTGCTTGCTATCATGTGTGCCCCAACTATACCAATTTCTGGTCTGCAAGGCTCCCCGAGACGAT	WT	TwoExp	id_uc001pqh.1_1738_WT	id_uc001pqh.1_1738_WT	id_uc001pqh.1_1738
ATGGGGTTCGGTATGCGCCTGATGGGGCTGGAATAGTTGAGGTGGATGGTTCTACCCTTTCTGCCTTCTGTTTGGGACCCAGCGTCACGCAAAGGCTCCCCGAGACGAT	WT	IdentifiedTRUB1	id_uc002xnu.3_1948_WT	id_uc002xnu.3_1948_WT	id_uc002xnu.3_1948
ATGGGGTTCGGTATGCGCAGTTCTTTTAGAACTCATCAAATTGAAGCTGTTCCAACCAGCTCTGCAAGTGATGGATTTAAGGCTTAACGTTAAGGCTCCCCGAGACGAT	WT	TwoExp	id_uc001cur.2_1435_WT	id_uc001cur.2_1435_WT	id_uc001cur.2_1435
ATGGGGTTCGGTATGCGCAGTTCTTTTAGAACTCATCAAATTGAAGCTGTTCCAACCAGCTCTGCAAGTGATGGATTTAAGGCTTAACGTTAAGGCTCCCCGAGACGAT	WT	IdentifiedTRUB1	id_uc001cur.2_1435_WT	id_uc001cur.2_1435_WT	id_uc001cur.2_1435
ATGGGGTTCGGTATGCGCAGTTCTTTTAGAACTCATCAAATTGAAGCTGTTCCAACCAGCTCTGCAAGTGATGGATTTAAGGCGATAGGTCAAGGCTCCCCGAGACGAT	WT	TwoExp	id_uc001cur.2_1435_WT	id_uc001cus.2_4178_WT	id_uc001cus.2_4178
ATGGGGTTCGGTATGCGCAGTTCTTTTAGAACTCATCAAATTGAAGCTGTTCCAACCAGCTCTGCAAGTGATGGATTTAAGGCGATAGGTCAAGGCTCCCCGAGACGAT	WT	IdentifiedTRUB1	id_uc001cur.2_1435_WT	id_uc001cus.2_4178_WT	id_uc001cus.2_4178
ATGGGGTTCGGTATGCGCGTGAAATCACAGCTAAAACATCTTTCACTGGTTCCAGTCCACCTGGGAAACTCACCAGGCCAAGCTTCGTTCAAAGGCTCCCCGAGACGAT	WT	PredictedTRUB1	id_uc021qxf.1_3915_WT	id_uc021qxf.1_3915_WT	id_uc021qxf.1_3915
ATGGGGTTCGGTATGCGCTCGTCCAAGCCACCCCCCACAATAGGGTATCATTTTTACGGGCCTTCTGGAGATGCTTCCGAACTTTATAGTCAAGGCTCCCCGAGACGAT	WT	Pus1	id_uc001ndr.3_339_WT	id_uc001ndr.3_339_WT	id_uc001ndr.3_339
ATGGGGTTCGGTATGCGCCACGGAGTTCATGGGAGTGAATATGGATGTGATTCGTGCCCTCCTCATCTTCCTAGAGAAGCGTTCTCCCGTTAAGGCTCCCCGAGACGAT	WT	TwoExp	id_uc001lof.3_1255_WT	id_uc001lof.3_1255_WT	id_uc001lof.3_1255
ATGGGGTTCGGTATGCGCTCTCAGCACAGCCAGCTCCGTGCCCTCTGAATTATGTTTCGCAGAAAAGTGTCCCCAAGGAAGTGTGGCGTACAAGGCTCCCCGAGACGAT	WT	TwoExp	id_uc002dlq.3_1381_WT	id_uc002dlq.3_1381_WT	id_uc002dlq.3_1381
ATGGGGTTCGGTATGCGCCGGCCCTTCCGTTTTCTTTGTCACTCGTAAAGTCTCATATAATGGCAGCAAAGGCTGTAGCAAATGAGCGCCTAAGGCTCCCCGAGACGAT	WT	TwoExp	id_uc011cms.2_357_WT	id_uc011cms.2_357_WT	id_uc011cms.2_357
ATGGGGTTCGGTATGCGCCTCACTAGGTGCAGAGAGCCCAGGCCTTATGTTAAAATCATGCACTTGAAAAGCAAACCTTAATCTGAAGTCAAAGGCTCCCCGAGACGAT	WT	TwoExp	id_uc003vnq.3_3129_WT	id_uc003vnq.3_3129_WT	id_uc003vnq.3_3129
ATGGGGTTCGGTATGCGCGACTTTCCTCAGGGATCACACCAATGCACAGTTCAAATCTCTGGTTGACTTGACAGCAGTGGACGGAACCGTAAAGGCTCCCCGAGACGAT	WT	PredictedTRUB1	id_uc001nft.3_1124_WT	id_uc001nft.3_1124_WT	id_uc001nft.3_1124
ATGGGGTTCGGTATGCGCTGATGTTGTGAAGTCTGTCACCAATGAGGATGTTACCCAGGAGGAGCTCGGTGGTGCCAAGACCCTTTACATCAAGGCTCCCCGAGACGAT	WT	Pus1	id_uc003eqy.2_768_WT	id_uc003eqy.2_768_WT	id_uc003eqy.2_768
ATGGGGTTCGGTATGCGCGGGCCCTAAGAGCTTGGACTTTGAAGCCAGGTTCAAATCCTGGCTTTCTCACCTTCTAGCTCCGTCCCCACTTAAGGCTCCCCGAGACGAT	WT	PredictedTRUB1	id_uc003fub.1_2697_WT	id_uc003fub.1_2697_WT	id_uc003fub.1_2697
ATGGGGTTCGGTATGCGCAGCGCATAAATCTTTCGCCTTTTACTAAAGATTTCCGTGGAGAGAAAGTTGTGAGTTTTTATTCACGGCCTACAAGGCTCCCCGAGACGAT	WT	TwoExp	id_uc021omv.1_4198_WT	id_uc021omv.1_4198_WT	id_uc021omv.1_4198
ATGGGGTTCGGTATGCGCCAGTCTTTCTCATCTTGTTCCTGCCTTGAGGTTACCAGGTAGAAAACTGGTGTCATCAGCTGTTTTCCCGCCCAAGGCTCCCCGAGACGAT	WT	Pus1	id_uc003tue.2_1153_WT	id_uc003tue.2_1153_WT	id_uc003tue.2_1153
ATGGGGTTCGGTATGCGCCGAGGGGACAGCCTATCAGGCAAGTATTTGGTTCCAGCCCACCAAATCTGTATGAAACTGAGATTAGCGACCAAAGGCTCCCCGAGACGAT	WT	PredictedTRUB1	id_uc001nmq.1_1360_WT	id_uc001nmq.1_1360_WT	id_uc001nmq.1_1360
ATGGGGTTCGGTATGCGCGGGGATGGCTTGAAGGATTAGTCCTGCTTTGTTCAACTCAGAGCTCAGAATAAGAGAAGCAGTTTGGAAGTCTAAGGCTCCCCGAGACGAT	WT	PredictedTRUB1	id_uc002wtv.1_876_WT	id_uc002wtv.1_876_WT	id_uc002wtv.1_876
ATGGGGTTCGGTATGCGCTTCTGGTGTGGCCTTCACCGGTGCCAAGGAGTTACAGCTGGCGGATGCTGCCAAGCGGGGAGCGTCATATACAAAGGCTCCCCGAGACGAT	WT	TwoExp	id_uc010zpa.2_518_WT	id_uc010zpa.2_518_WT	id_uc010zpa.2_518
ATGGGGTTCGGTATGCGCAAACCAGATAATCTACTTTTTTACCTTAGGTATTGGCATACTCCACACATCTGTACCATTCTTGATGCTGTTTAAGGCTCCCCGAGACGAT	WT	TwoExp	id_uc001pec.3_2456_WT	id_uc001pec.3_2456_WT	id_uc001pec.3_2456
ATGGGGTTCGGTATGCGCCCACTGTCTCACAGATTGTTTTTTGTATATTGTAGCAAAATCCTGAAACAATGGGGTCCTTCCAGCCCTTAATAAGGCTCCCCGAGACGAT	WT	TwoExp	id_uc002srj.3_1919_WT	id_uc002srj.3_1919_WT	id_uc002srj.3_1919
ATGGGGTTCGGTATGCGCATTCCTTCTATTAAGGGATTGGCTCGCTGAGTTCTAAGCTCTAAATGGGTCAACTCCTTTGTTTTGTTCGTATAAGGCTCCCCGAGACGAT	WT	IdentifiedTRUB1	id_uc002pql.4_1772_WT	id_uc002pql.4_1772_WT	id_uc002pql.4_1772
ATGGGGTTCGGTATGCGCATTCCTTCTATTAAGGGATTGGCTCGCTGAGTTCTAAGCTCTAAATGGGTCAACTCCTTTGTTTTGTTCGTATAAGGCTCCCCGAGACGAT	WT	TwoExp	id_uc002pql.4_1772_WT	id_uc002pql.4_1772_WT	id_uc002pql.4_1772
ATGGGGTTCGGTATGCGCATTCCTTCTATTAAGGGATTGGCTCGCTGAGTTCTAAGCTCTAAATGGGTCAACTCCTTTGTTTTTGGCTGCGAAGGCTCCCCGAGACGAT	WT	IdentifiedTRUB1	id_uc002pql.4_1772_WT	id_uc002pqn.4_1172_WT	id_uc002pqn.4_1172
ATGGGGTTCGGTATGCGCATTCCTTCTATTAAGGGATTGGCTCGCTGAGTTCTAAGCTCTAAATGGGTCAACTCCTTTGTTTTTGGCTGCGAAGGCTCCCCGAGACGAT	WT	TwoExp	id_uc002pql.4_1772_WT	id_uc002pqn.4_1172_WT	id_uc002pqn.4_1172
ATGGGGTTCGGTATGCGCAGGCAACTGACAGATTCTGCCTTTTAGGTACTTGAACTGGCAGGAAATGCATCAAAAGACTTAAATACGGCCAAAGGCTCCCCGAGACGAT	WT	TwoExp	id_uc003hvn.1_995_WT	id_uc003hvn.1_995_WT	id_uc003hvn.1_995
ATGGGGTTCGGTATGCGCAATTCCTTAGTGCAGGGGAACGGAGTCTTGAATTCCAGGGATGCGGCAAGACACACAGCCGGAGCTATCCAATAAGGCTCCCCGAGACGAT	WT	TwoExp	id_uc002szb.3_1236_WT	id_uc002szb.3_1236_WT	id_uc002szb.3_1236
ATGGGGTTCGGTATGCGCGCGAGGCGCGGGCTGTGGGGCCGCCGCGTGCCTGGCCCCGCTCGCCCGTGCCGGCCGCTCGCCCGGGAGAAAGAAGGCTCCCCGAGACGAT	WT	CTGsites	id_uc002hcs.3_75_WT	id_uc002hcs.3_75_WT	id_uc002hcs.3_75
ATGGGGTTCGGTATGCGCGCGAGGCGCGGGCTGTGGGGCCGCCGCGTGCCTGGCCCCGCTCGCCCGTGCCGGCCGCTCGCCCGTCCGGAACAAGGCTCCCCGAGACGAT	WT	CTGsites	id_uc002hcs.3_75_WT	id_uc002hcs.3_75_WT	id_uc002hcs.3_75
ATGGGGTTCGGTATGCGCCGCGGGACGGAGCTTGGCTGTTGGTCGGTGGGTTCCCGTGCGGCGGCGGCCAAGGAGGAGGAGACATCTCTTTAAGGCTCCCCGAGACGAT	WT	TwoExp	id_uc003miu.3_74_WT	id_uc003miu.3_74_WT	id_uc003miu.3_74
ATGGGGTTCGGTATGCGCTATTAGCAGCGGTTATTCGGAACTATATAAAGTTCAGAAAACATGTCTCGAAGATATGACTCCAGAAATCGATAAGGCTCCCCGAGACGAT	WT	TwoExp	id_uc010blf.3_74_WT	id_uc010blf.3_74_WT	id_uc010blf.3_74
ATGGGGTTCGGTATGCGCCACCGCGCATGCTCCTTCCTTTCCAGCCCCGGTACCGGACCCTGCAGCCGCAGAGATGTTGATGCTTACAAGCAAGGCTCCCCGAGACGAT	WT	TwoExp	id_uc021yyt.1_73_WT	id_uc021yyt.1_73_WT	id_uc021yyt.1_73
ATGGGGTTCGGTATGCGCTTGCTGCTTCCTCCTCCTCGGCCTCACCGTTTTTGCCAATCCAGAAGACTGTGTAGCATTTGGCAACCATCGCAAGGCTCCCCGAGACGAT	WT	TwoExp	id_uc009zih.1_72_WT	id_uc009zih.1_72_WT	id_uc009zih.1_72
ATGGGGTTCGGTATGCGCATGCCCGGTTGGCCACCCCGTTTCTGGGGGCATGAGCTTCACCACTCGCTCCACCTTCTCCACCAAATCATTTAAGGCTCCCCGAGACGAT	WT	Dkc1	id_uc001sbe.3_72_WT	id_uc001sbe.3_72_WT	id_uc001sbe.3_72
ATGGGGTTCGGTATGCGCCGAGCGCGGCGGCGGCGGTGGGCCGTGCGGGTTCCAGCCCGCGTCCCGCGGCGGCGGCGAGCAAGGGAACTAGAAGGCTCCCCGAGACGAT	WT	PredictedTRUB1	id_uc003tme.3_70_WT	id_uc003tme.3_70_WT	id_uc003tme.3_70
ATGGGGTTCGGTATGCGCGTGACCTTTCCGAGTTGGCTGCAGATTTGTGGTGCGTTCTGAGCCGTCTGTCCTGCGCCAAGATGGGTGCCCCAAGGCTCCCCGAGACGAT	WT	TwoExp	id_uc001yoi.4_69_WT	id_uc001yoi.4_69_WT	id_uc001yoi.4_69
ATGGGGTTCGGTATGCGCTTTCCTTTCGCTGCTGCGGCCGCAGCCATGAGTATGCTCAGGCTTCAGAAGAGGCTCGCCTCTAGATCTCAAGAAGGCTCCCCGAGACGAT	WT	TwoExp	id_uc002hrq.1_69_WT	id_uc002hrq.1_69_WT	id_uc002hrq.1_69
ATGGGGTTCGGTATGCGCGGCTTGGGGCGCTGGCACCTCCTCTTACAGCTTTACTCCTGCCAGCTTGGGAAAAGGCCGGAGAAAGCTATGTAAGGCTCCCCGAGACGAT	WT	Pus1	id_uc001yck.3_69_WT	id_uc001yck.3_69_WT	id_uc001yck.3_69
ATGGGGTTCGGTATGCGCAAATGCAGACCGCGCGGCCGTAGCTTCCTCTCTGCTCTCGCGGCCGACTCGCAAGATGGCGCCGCCCCTCAATAAGGCTCCCCGAGACGAT	WT	TwoExp	id_uc003fhc.4_68_WT	id_uc003fhc.4_68_WT	id_uc003fhc.4_68
ATGGGGTTCGGTATGCGCTGGTACTTAAAAACAGCACCTTAGGATCTAGTTCCATCCTATCTTTTCCCTTAAATGCCATGACAACGAATACAAGGCTCCCCGAGACGAT	WT	PredictedTRUB1	id_uc003zlm.3_67_WT	id_uc003zlm.3_67_WT	id_uc003zlm.3_67
ATGGGGTTCGGTATGCGCGGGGCCATATTAGCAGCGGTTATTCGGAACTATATAAAGTTCAGAAAACATGTCTCGAAGATATGCGGTATGCAAGGCTCCCCGAGACGAT	WT	TwoExp	id_uc010blf.3_67_WT	id_uc010blf.3_67_WT	id_uc010blf.3_67
ATGGGGTTCGGTATGCGCCTCTCTTTAGACAGGACTTATCCAGAGGGGGCTGCAGGCGAGCACTCTCGTGCCCCGCCGGAGCGCGCTACTTAAGGCTCCCCGAGACGAT	WT	CTGsites	id_uc004dba.4_67_WT	id_uc004dba.4_67_WT	id_uc004dba.4_67
ATGGGGTTCGGTATGCGCCTCTCTTTAGACAGGACTTATCCAGAGGGGGCTGCAGGCGAGCACTCTCGTGCCCCGCCGGAGCGTGCCCCGCAAGGCTCCCCGAGACGAT	WT	CTGsites	id_uc004dba.4_67_WT	id_uc004dba.4_67_WT	id_uc004dba.4_67
ATGGGGTTCGGTATGCGCCGGTGACTCAGTGTTCGCGGGAGCGCCGCACCTACACCAGCCAACCCAGATCCCGAGGTCCGACATCTATGATAAGGCTCCCCGAGACGAT	WT	TwoExp	id_uc001fni.2_66_WT	id_uc001fni.2_66_WT	id_uc001fni.2_66
ATGGGGTTCGGTATGCGCCCGTGTGGGTGAGTTGGCTGCCGGGGCGTGAATACTTTTTCTCCCGAAGGAAGATTATTTCAAGTGGGGTCTGAAGGCTCCCCGAGACGAT	WT	TwoExp	id_uc021ord.1_66_WT	id_uc021ord.1_66_WT	id_uc021ord.1_66
ATGGGGTTCGGTATGCGCCTTGTGCGGCATCCTGCTCCGTCTGCAGGTTGTGCTTCCGGTGCGGAGGTCAGGGACAAGATGGTAATAGAGAAAGGCTCCCCGAGACGAT	WT	Pus1	id_uc003gas.3_65_WT	id_uc003gas.3_65_WT	id_uc003gas.3_65
ATGGGGTTCGGTATGCGCGCGCATGCGCGGAGCGCGGCGCGCGCGGCGGTTGGGCCGTTGGCTGTTCGGCCCTGGGATCCGCCATAACGTTAAGGCTCCCCGAGACGAT	WT	Dkc1	id_uc004dho.3_65_WT	id_uc004dho.3_65_WT	id_uc004dho.3_65
ATGGGGTTCGGTATGCGCTGGCTCTTCGGGTAAAGATGGCGGAGCGCGGGTACAGCTTTTCGCTGACTACATTCAGCCCGTCTTTCCGAGAAAGGCTCCCCGAGACGAT	WT	TwoExp	id_uc003thy.3_65_WT	id_uc003thy.3_65_WT	id_uc003thy.3_65
ATGGGGTTCGGTATGCGCGCGGAAGTGGGCGAGTCAGAGCACATCCGGTGTTAGAAGCGCTGGTAGGCCTTGGAGAGGCGGGTAGGCAGGTAAGGCTCCCCGAGACGAT	WT	TwoExp	id_uc001rux.2_64_WT	id_uc001rux.2_64_WT	id_uc001rux.2_64
ATGGGGTTCGGTATGCGCCCACCGTCCCTTCTCTCTTCCTCGGCGCTGCCTACGGAGGTGGCAGCCATCTCCTTCTCGCTGGCTTGACTCAAAGGCTCCCCGAGACGAT	WT	TwoExp	id_uc003bxn.3_63_WT	id_uc003bxn.3_63_WT	id_uc003bxn.3_63
ATGGGGTTCGGTATGCGCAAGGCAGCGCCCCGGAGAGCTCTTGCGCGTCTTGTTCTTGCCTGGTGTCGGTGGTTAGTTTCTGCACCGGTCGAAGGCTCCCCGAGACGAT	WT	TwoExp	id_uc001coa.3_62_WT	id_uc001coa.3_62_WT	id_uc001coa.3_62
ATGGGGTTCGGTATGCGCTCAAGGCAGCCATCTCGCCGTGAGACAGCAAGTGTCGGATCCGCAGGCGCAGCCGTGCGATGTTGTTCCTACAAAGGCTCCCCGAGACGAT	WT	TwoExp	id_uc011ehe.2_62_WT	id_uc011ehe.2_62_WT	id_uc011ehe.2_62
ATGGGGTTCGGTATGCGCATTAGGTGGTTTCCGGTTCCGCTATCTTCTTTTTCTTCAGCGAGGCGGCCGAGCTGACGCAAACAGCCGTCTAAAGGCTCCCCGAGACGAT	WT	TwoExp	id_uc002njs.3_62_WT	id_uc002njs.3_62_WT	id_uc002njs.3_62
ATGGGGTTCGGTATGCGCTTACGGCAGGCGTCCGCGTCGCTAGCTAGTCGTTCTGAAGCGGCGGCCAGAGAAGAGTCAAGGGCCTAGAAGAAAGGCTCCCCGAGACGAT	WT	TwoExp	id_uc001ccy.3_62_WT	id_uc001ccy.3_62_WT	id_uc001ccy.3_62
ATGGGGTTCGGTATGCGCGCGGCCGGTTTGGCCCTTCTTTGTAGGAGAGTTTCATCCGCCCTGAAATCTTCCCGATCGTTAATTATACTCGAAGGCTCCCCGAGACGAT	WT	TwoExp	id_uc003fjz.3_62_WT	id_uc003fjz.3_62_WT	id_uc003fjz.3_62
ATGGGGTTCGGTATGCGCCAAGTGTAGTATCTGTTCTTATCAGTTTAATATCTGATACGTCCTCTATCCGAGGACAATATATTTGAGCATCAAGGCTCCCCGAGACGAT	WT	TwoExp	id_uc009yoi.2_61_WT	id_uc009yoi.2_61_WT	id_uc009yoi.2_61
ATGGGGTTCGGTATGCGCTGACCTGCCCTCCTGGCTGCAGGTGCTGGACCTGGTGGAGGTGCTAGTGACCAAGCAGCCCGAGACGACTGGCAAGGCTCCCCGAGACGAT	WT	CTGsites	id_uc010vsa.2_61_WT	id_uc010vsa.2_61_WT	id_uc010vsa.2_61
ATGGGGTTCGGTATGCGCTGACCTGCCCTCCTGGCTGCAGGTGCTGGACCTGGTGGAGGTGCTAGTGACCAAGCAGCCCGAGAGAAACTAAAAGGCTCCCCGAGACGAT	WT	CTGsites	id_uc010vsa.2_61_WT	id_uc010vsa.2_61_WT	id_uc010vsa.2_61
ATGGGGTTCGGTATGCGCGCCTCGGCGGCAGAGGAGACTCGGGGGCCATTTTGTGAAGAGACGAAGACTGAGCGGTTGTGGCCAGGCGCCCAAGGCTCCCCGAGACGAT	WT	TwoExp	id_uc001waa.3_60_WT	id_uc001waa.3_60_WT	id_uc001waa.3_60
ATGGGGTTCGGTATGCGCGAGCCCCTGGAGTAGGCGCTTCCGGCCATTCATACTGCAGTCGGTCAGTGTTCGGTTGAAGGATTCCATAGCCAAGGCTCCCCGAGACGAT	WT	TwoExp	id_uc002ktj.1_60_WT	id_uc002ktj.1_60_WT	id_uc002ktj.1_60
ATGGGGTTCGGTATGCGCCCTCTCGGCTTTCGGCTCGGAGGAGGCCAAGGTGCAACTTCCTTCGGTCGTCCCGAATCCGGGTTATAAGTCGAAGGCTCCCCGAGACGAT	WT	TwoExp	id_uc004bqy.2_60_WT	id_uc004bqy.2_60_WT	id_uc004bqy.2_60
ATGGGGTTCGGTATGCGCCTGGGCCATGGAGACTGTGGCACAGTAGACTGTAGTGTGAGGCTCGCGGGGGCAGTGGCCATGGAACCCCTCCAAGGCTCCCCGAGACGAT	WT	TwoExp	id_uc003uyj.4_60_WT	id_uc003uyj.4_60_WT	id_uc003uyj.4_60
ATGGGGTTCGGTATGCGCGACTAGCTGCTTCCTTTCTCTCTCGCGCGCGGTGTGGTGGCAGCAGGCGCAGCCCAGCCTCGAAACCTTGAGAAAGGCTCCCCGAGACGAT	WT	TwoExp	id_uc002ycr.3_60_WT	id_uc002ycr.3_60_WT	id_uc002ycr.3_60
ATGGGGTTCGGTATGCGCCTTCCTTCTCGCCTAACGCCGCCAACATGGTGTTCAGGCGCTTCGTGGAGGTTGGCCGGGTGGCCCCCGGGATAAGGCTCCCCGAGACGAT	WT	TwoExp	id_uc003ckg.3_59_WT	id_uc003ckg.3_59_WT	id_uc003ckg.3_59
ATGGGGTTCGGTATGCGCATCAAGTGTAGTATCTGTTCTTATCAGTTTAATATCTGATACGTCCTCTATCCGAGGACAATATAACGGTTTAAAGGCTCCCCGAGACGAT	WT	TwoExp	id_uc009yoi.2_59_WT	id_uc009yoi.2_59_WT	id_uc009yoi.2_59
ATGGGGTTCGGTATGCGCCCGTAAGGCCGACCGGCCTCTACCGGCGGGATTTGATGGCGTGATGTCTCACAGAAAGTTCTCCGGTATCATCAAGGCTCCCCGAGACGAT	WT	TwoExp	id_uc003axi.3_59_WT	id_uc003axi.3_59_WT	id_uc003axi.3_59
ATGGGGTTCGGTATGCGCGGACAGCAGTCTGGCTTCCGCGGTCGGACTTCTACACCCGCCTCCAGACAGGAGAGGGGCACGTAATATCACGAAGGCTCCCCGAGACGAT	WT	TwoExp	id_uc002dsx.3_59_WT	id_uc002dsx.3_59_WT	id_uc002dsx.3_59
ATGGGGTTCGGTATGCGCGGACAGCAGTCTGGCTTCCGCGGTCGGACTTCTACACCCGCCTCCAGACAGGAGAGGGGCACGTAATATCACGAAGGCTCCCCGAGACGAT	WT	TwoExp	id_uc002dsx.3_59_WT	id_uc002dsx.3_59_WT	id_uc002dsx.3_59
ATGGGGTTCGGTATGCGCGGACAGCAGTCTGGCTTCCGCGGTCGGACTTCTACACCCGCCTCCAGACAGGAGAGGGGCACGTACCTTAGGCAAGGCTCCCCGAGACGAT	WT	TwoExp	id_uc002dsx.3_59_WT	id_uc002dxg.3_59_WT	id_uc002dxg.3_59
ATGGGGTTCGGTATGCGCGGACAGCAGTCTGGCTTCCGCGGTCGGACTTCTACACCCGCCTCCAGACAGGAGAGGGGCACGTACCTTAGGCAAGGCTCCCCGAGACGAT	WT	TwoExp	id_uc002dsx.3_59_WT	id_uc002dxg.3_59_WT	id_uc002dxg.3_59
ATGGGGTTCGGTATGCGCTACACTGCGCAGTCTGGGGGCGGGGCCGGAGTTCAAGCCTCGGAGGAAGTAAATGCAAATCTAAGGCTGCTCAAAGGCTCCCCGAGACGAT	WT	PredictedTRUB1	id_uc001grg.4_58_WT	id_uc001grg.4_58_WT	id_uc001grg.4_58
ATGGGGTTCGGTATGCGCCTAACCTTGATCCCAGCAATGTGGATTCCCTCTTCTACGCTGCCCAGGCCAGCCAGGCCCTCTCAGCAGCGCAAAGGCTCCCCGAGACGAT	WT	TwoExp	id_uc021wdb.1_56_WT	id_uc021wdb.1_56_WT	id_uc021wdb.1_56
ATGGGGTTCGGTATGCGCTAAGATCAAGTGTAGTATCTGTTCTTATCAGTTTAATATCTGATACGTCCTCTATCCGAGGACAAGCTTGCGTAAGGCTCCCCGAGACGAT	WT	TwoExp	id_uc009yoi.2_55_WT	id_uc009yoi.2_55_WT	id_uc009yoi.2_55
ATGGGGTTCGGTATGCGCGCTACTGCTCGTGGAGGGGAATACAGGCTCCCTGGGGAAGGGAATGCAGGGTTGCTGGGGCTGGGACGGTCCAAAGGCTCCCCGAGACGAT	WT	CTGsites	id_uc021ywf.1_54_WT	id_uc021ywf.1_54_WT	id_uc021ywf.1_54
ATGGGGTTCGGTATGCGCGCTACTGCTCGTGGAGGGGAATACAGGCTCCCTGGGGAAGGGAATGCAGGGTTGCTGGGGCTGGGCACGGTGTAAGGCTCCCCGAGACGAT	WT	CTGsites	id_uc021ywf.1_54_WT	id_uc021ywf.1_54_WT	id_uc021ywf.1_54
ATGGGGTTCGGTATGCGCCGTAGCGGGAGGGCGAAAGATGGCGGCGGCAGTACTGGGACAGTTGGGTGCGTTATGGATACATAACACAGGAAAGGCTCCCCGAGACGAT	WT	TwoExp	id_uc003lvy.4_53_WT	id_uc003lvy.4_53_WT	id_uc003lvy.4_53
ATGGGGTTCGGTATGCGCAACATGGCTGCGGCCGGTTTGGCCCTTCTTTGTAGGAGAGTTTCATCCGCCCTGAAATCTTCCCGCAATGTCAAAGGCTCCCCGAGACGAT	WT	TwoExp	id_uc003fjz.3_53_WT	id_uc003fjz.3_53_WT	id_uc003fjz.3_53
ATGGGGTTCGGTATGCGCAGCGCGGCGCGGGAGGCCGGCGGCCGGCCGGCTGCATGGCGCGCTGCGAGAGGCTGCGCGGAGCGGCAACTCAAAGGCTCCCCGAGACGAT	WT	CTGsites	id_uc003atm.1_52_WT	id_uc003atm.1_52_WT	id_uc003atm.1_52
ATGGGGTTCGGTATGCGCAGCGCGGCGCGGGAGGCCGGCGGCCGGCCGGCTGCATGGCGCGCTGCGAGAGGCTGCGCGGAGCGTGACAAGAAAGGCTCCCCGAGACGAT	WT	CTGsites	id_uc003atm.1_52_WT	id_uc003atm.1_52_WT	id_uc003atm.1_52
ATGGGGTTCGGTATGCGCAATGACGACAGACGTTCTTTCTTTGCTGCGTCTACTGCGAGAATGAAGACTATTCTCAGCAATCAAAGTCGACAAGGCTCCCCGAGACGAT	WT	TwoExp	id_uc003guc.3_51_WT	id_uc003guc.3_51_WT	id_uc003guc.3_51
ATGGGGTTCGGTATGCGCGCGGAAGCAGCGCGGAGGTCGGAGAAGTGGCCTAAAACTTCGGCGTTGGGTGAAAGAAAATGGCCCAAATGGGAAGGCTCCCCGAGACGAT	WT	TwoExp	id_uc001rkr.3_50_WT	id_uc001rkr.3_50_WT	id_uc001rkr.3_50
ATGGGGTTCGGTATGCGCCGGGCCCACGGGGCTGCAGGTGTGGAGCCCCCTGGAGCTGAGATCAGGATGTTCCGCTTCATGAGTTGTGGTTAAGGCTCCCCGAGACGAT	WT	CTGsites	id_uc010sfi.2_49_WT	id_uc010sfi.2_49_WT	id_uc010sfi.2_49
ATGGGGTTCGGTATGCGCCGGGCCCACGGGGCTGCAGGTGTGGAGCCCCCTGGAGCTGAGATCAGGATGTTCCGCTTCATGAGACGCCATCAAGGCTCCCCGAGACGAT	WT	CTGsites	id_uc010sfi.2_49_WT	id_uc010sfi.2_49_WT	id_uc010sfi.2_49
ATGGGGTTCGGTATGCGCTGAAAACGTGGTGCATTTCTTTTCTGCTTAGTTCAAACCTAAAGGCAATTGTTTATTTAGAAATGAATGAGGAAAGGCTCCCCGAGACGAT	WT	PredictedTRUB1	id_uc011axj.1_49_WT	id_uc011axj.1_49_WT	id_uc011axj.1_49
ATGGGGTTCGGTATGCGCGCAGTACCGGAGGAGAAAGATGGCGGCTACCTTACTAGCTGCTCGGGGAGCCGGGCCAGCACCGGAATTCATCAAGGCTCCCCGAGACGAT	WT	TwoExp	id_uc002fzb.3_48_WT	id_uc002fzb.3_48_WT	id_uc002fzb.3_48
ATGGGGTTCGGTATGCGCCTGAGGAGATTGGAGGGGCGGCTGCGCGAGGCTGCAGACTGGTGCAGCGCACTGTGCTGGCGGCTTTCACTGCAAGGCTCCCCGAGACGAT	WT	CTGsites	id_uc003pja.4_46_WT	id_uc003pja.4_46_WT	id_uc003pja.4_46
ATGGGGTTCGGTATGCGCCTGAGGAGATTGGAGGGGCGGCTGCGCGAGGCTGCAGACTGGTGCAGCGCACTGTGCTGGCGGCTAGCCTGTAAAGGCTCCCCGAGACGAT	WT	CTGsites	id_uc003pja.4_46_WT	id_uc003pja.4_46_WT	id_uc003pja.4_46
ATGGGGTTCGGTATGCGCGCAGCCTCCCGCTTCGCTCTCTGCTCCTCCTGTTCGACAGTCAGCCGCATCTTCTTTTGCGTCGCTCCCATCGAAGGCTCCCCGAGACGAT	WT	TwoExp	id_uc001qop.1_45_WT	id_uc001qop.1_45_WT	id_uc001qop.1_45
ATGGGGTTCGGTATGCGCGCCTTTTGGCTAAGATCAAGTGTAGTATCTGTTCTTATCAGTTTAATATCTGATACGTCCTCTATTACATCGTAAGGCTCCCCGAGACGAT	WT	TwoExp	id_uc009yoi.2_45_WT	id_uc009yoi.2_45_WT	id_uc009yoi.2_45
ATGGGGTTCGGTATGCGCGTTTGAAGAAGGTGAAGAAACAATTACAGCCTTTGTAGAACCTTTTGTAATTTTACTCATATTAGCGCGTAACAAGGCTCCCCGAGACGAT	WT	TwoExp	id_uc021rdt.1_45_WT	id_uc021rdt.1_45_WT	id_uc021rdt.1_45
ATGGGGTTCGGTATGCGCGTATGGCCGGCGACATTAGCTAGCGCTCGCTCTACTCTCTCTAACGGGAAAGCAGCGGAATACAACGCAGGAGAAGGCTCCCCGAGACGAT	WT	TwoExp	id_uc003puk.1_44_WT	id_uc003puk.1_44_WT	id_uc003puk.1_44
ATGGGGTTCGGTATGCGCTGCTGCTAGTCGCGGACGCAATGGCTTCAAGGTTACTTCGCGGAGCTGGAACGCTGGCCGCGCAGGCTACCGCAAGGCTCCCCGAGACGAT	WT	TwoExp	id_uc002sya.3_43_WT	id_uc002sya.3_43_WT	id_uc002sya.3_43
ATGGGGTTCGGTATGCGCCTTTTACCAAGGACCCGCCAACATGGGCCGCGTTCGCACCAAAACCGTGAAGAAGGCGGCCCGGGCAGTGCTAAAGGCTCCCCGAGACGAT	WT	TwoExp	id_uc002bhr.1_41_WT	id_uc002bhr.1_41_WT	id_uc002bhr.1_41
ATGGGGTTCGGTATGCGCCTTTTACCAAGGACCCGCCAACATGGGCCGCGTTCGCACCAAAACCGTGAAGAAGGCGGCCCGGGCAGTGCTAAAGGCTCCCCGAGACGAT	WT	TwoExp	id_uc002bhr.1_41_WT	id_uc002bhr.1_41_WT	id_uc002bhr.1_41
ATGGGGTTCGGTATGCGCCTTTTACCAAGGACCCGCCAACATGGGCCGCGTTCGCACCAAAACCGTGAAGAAGGCGGCCCGGGTCGTAAGGAAGGCTCCCCGAGACGAT	WT	TwoExp	id_uc002bhr.1_41_WT	id_uc002bio.1_41_WT	id_uc002bio.1_41
ATGGGGTTCGGTATGCGCCTTTTACCAAGGACCCGCCAACATGGGCCGCGTTCGCACCAAAACCGTGAAGAAGGCGGCCCGGGTCGTAAGGAAGGCTCCCCGAGACGAT	WT	TwoExp	id_uc002bhr.1_41_WT	id_uc002bio.1_41_WT	id_uc002bio.1_41
ATGGGGTTCGGTATGCGCGACGGAAGTTCCCGAAGCTTCCGGTGGCCGGCTTAGTTAGGAGCTATGGCTAAACATCATCCTGACGGTGTGGAAGGCTCCCCGAGACGAT	WT	TwoExp	id_uc003bab.3_40_WT	id_uc003bab.3_40_WT	id_uc003bab.3_40
ATGGGGTTCGGTATGCGCCCTGCAGGGTCATCCCTAATCTCTTCCCCAAGTACATCCGTGCCCCCAACGGGCCCGAAGCCAACGGCCCTTGAAGGCTCCCCGAGACGAT	WT	TwoExp	id_uc002flo.4_40_WT	id_uc002flo.4_40_WT	id_uc002flo.4_40
ATGGGGTTCGGTATGCGCCTAAGCCCGAGGTTTCTTCTCTTTTGCAGTCCTGCTTCACCTTCCCCTGACCTGAGTAGTCGCCATGTCGCCTAAGGCTCCCCGAGACGAT	WT	CTGsites	id_uc003idu.4_40_WT	id_uc003idu.4_40_WT	id_uc003idu.4_40
ATGGGGTTCGGTATGCGCCTAAGCCCGAGGTTTCTTCTCTTTTGCAGTCCTGCTTCACCTTCCCCTGACCTGAGTAGTCGCCATCGCCTGTAAGGCTCCCCGAGACGAT	WT	CTGsites	id_uc003idu.4_40_WT	id_uc003idu.4_40_WT	id_uc003idu.4_40
ATGGGGTTCGGTATGCGCCCGGGAGAGTAGCAGTGCCTTGGACCCCAGGCTCCATCTGGCCTGAGCACCCTGCCCCAGCGAGTATCACGTTAAGGCTCCCCGAGACGAT	WT	TwoExp	id_uc010vuu.2_40_WT	id_uc010vuu.2_40_WT	id_uc010vuu.2_40
ATGGGGTTCGGTATGCGCCCGCGGGTGAGATCCCCAGCCCTGTGAGCCTGTAGGAGTAGAATGGCTCCCCAAATGTATGAGTTACCCAGGCAAGGCTCCCCGAGACGAT	WT	TwoExp	id_uc001qoo.2_38_WT	id_uc001qoo.2_38_WT	id_uc001qoo.2_38
ATGGGGTTCGGTATGCGCGCGTGCCCGTGCGCTGGTGAGGTGGCGTCCGTTCTACCCGGTCGCTCCCGTTCCGCGCCATGCAGCCGAGTATAAGGCTCCCCGAGACGAT	WT	TwoExp	id_uc003grk.2_38_WT	id_uc003grk.2_38_WT	id_uc003grk.2_38
ATGGGGTTCGGTATGCGCGCGTGCCCGTGCGCTGGTGAGGTGGCGTCCGTTCTACCCGGTCGCTCCCGTTCCGCGCCATGCAGCCGAGTATAAGGCTCCCCGAGACGAT	WT	IdentifiedTRUB1	id_uc003grk.2_38_WT	id_uc003grk.2_38_WT	id_uc003grk.2_38
ATGGGGTTCGGTATGCGCGCGTGCCCGTGCGCTGGTGAGGTGGCGTCCGTTCTACCCGGTCGCTCCCGTTCCGCGCCATGCAGCCTTAACTAAGGCTCCCCGAGACGAT	WT	TwoExp	id_uc003grk.2_38_WT	id_uc003grk.2_38_WT	id_uc003grk.2_38
ATGGGGTTCGGTATGCGCGCGTGCCCGTGCGCTGGTGAGGTGGCGTCCGTTCTACCCGGTCGCTCCCGTTCCGCGCCATGCAGCCTTAACTAAGGCTCCCCGAGACGAT	WT	IdentifiedTRUB1	id_uc003grk.2_38_WT	id_uc003grk.2_38_WT	id_uc003grk.2_38
ATGGGGTTCGGTATGCGCATAAGGCCGCTCGCTGACGCCGTGTTTCCTCTTTCGGCCGCGCTGGTGAACAGGACCCGTCGCCACTGTTCAGAAGGCTCCCCGAGACGAT	WT	TwoExp	id_uc003zec.3_36_WT	id_uc003zec.3_36_WT	id_uc003zec.3_36
ATGGGGTTCGGTATGCGCCTGCCACCGCAGTCTGGTTGGAGCTGTTGTCTTGTATGCTCAGCGAGGCCCGGAGAGACCCGGGATGCGCCAGAAGGCTCCCCGAGACGAT	WT	TwoExp	id_uc002rdv.3_36_WT	id_uc002rdv.3_36_WT	id_uc002rdv.3_36
ATGGGGTTCGGTATGCGCTCGCTTCTCGGCCTTTTGGCTAAGATCAAGTGTAGTATCTGTTCTTATCAGTTTAATATCTGATAGCCTTGAAAAGGCTCCCCGAGACGAT	WT	TwoExp	id_uc009yoi.2_35_WT	id_uc009yoi.2_35_WT	id_uc009yoi.2_35
ATGGGGTTCGGTATGCGCGGCGCTGCGGCAGTCCAGATCAAAAATGGCGGTAGTTGGTGTGTCCTCGGTTTCTCGGCTGCTGGACATTAAAAAGGCTCCCCGAGACGAT	WT	TwoExp	id_uc001tyf.1_35_WT	id_uc001tyf.1_35_WT	id_uc001tyf.1_35
ATGGGGTTCGGTATGCGCTTGCTCTCAGAGGCAGCGTGCGGGTGTGCTCTTTGTGAAATTCCACCATGGCGTACCGTGGCCAGTCCGGGACAAGGCTCCCCGAGACGAT	WT	TwoExp	id_uc001hai.3_35_WT	id_uc001hai.3_35_WT	id_uc001hai.3_35
ATGGGGTTCGGTATGCGCAATATAAGTGGAGGCGTCGCGCTGGCGGGCATTCCTGAAGCTGACAGCATTCGGGCCGAGATGTCTTGTTCTAAAGGCTCCCCGAGACGAT	WT	TwoExp	id_uc001zuc.3_34_WT	id_uc001zuc.3_34_WT	id_uc001zuc.3_34
ATGGGGTTCGGTATGCGCCCCTGGAGGCTGCCCGAATTTGTGCCAATAAGTACATGGTAAAAAGTTGTGGCAAAGATGGCTTCCCATCACCAAGGCTCCCCGAGACGAT	WT	TwoExp	id_uc004fkr.1_34_WT	id_uc004fkr.1_34_WT	id_uc004fkr.1_34
ATGGGGTTCGGTATGCGCCTGCTCTCGCAACTCAAGATGGCGGACGAGAGTGAGACAGCAGTGAAGCCGCCGGCACCTCCGCTGTATACCGAAGGCTCCCCGAGACGAT	WT	Dkc1	id_uc002ihz.3_34_WT	id_uc002ihz.3_34_WT	id_uc002ihz.3_34
ATGGGGTTCGGTATGCGCGCCGCTGTCGCCGCCGCGGAGACAAAGATGGCTGCGAGAGTCGGCGCCTTCCTCAAGAATGCCTGCGGCTCGAAAGGCTCCCCGAGACGAT	WT	TwoExp	id_uc002qde.3_34_WT	id_uc002qde.3_34_WT	id_uc002qde.3_34
ATGGGGTTCGGTATGCGCGGCGTCCATTTAGTGGCGGGAAAAGCGACCTTTTCTGAGCGCGTTTGCCTGTTGAGTGGTAGCCTCCGTCTGGAAGGCTCCCCGAGACGAT	WT	TwoExp	id_uc003jvp.3_40_WT	id_uc003jvp.3_40_WT	id_uc003jvp.3_40
ATGGGGTTCGGTATGCGCCACCTCTTCTGCCACAAACGTCAGCATGGTGGTATCAGCCGGCCCTTGGTCCAGCGAGAAGGCAGACCCGACCAAGGCTCCCCGAGACGAT	WT	TwoExp	id_uc021ovf.1_44_WT	id_uc021ovf.1_44_WT	id_uc021ovf.1_44
ATGGGGTTCGGTATGCGCCTAAAGTCCCCAGTCACCCACCCGGACTCACATTCTCCCCAGAGGCCGAGATGCGGGTCATGGCGCGATGCGCAAGGCTCCCCGAGACGAT	WT	TwoExp	id_uc003nsy.3_49_WT	id_uc003nsy.3_49_WT	id_uc003nsy.3_49
ATGGGGTTCGGTATGCGCGCTCGGGTCCGCGGCCGCTGCGGCGCCGGGCATTTCTCCGCAGCTCGGCTCGCGGCCGCGCCCGCCACGGAGGAAGGCTCCCCGAGACGAT	WT	Pus1	id_uc002kdf.3_56_WT	id_uc002kdf.3_56_WT	id_uc002kdf.3_56
ATGGGGTTCGGTATGCGCAGCTGCGGGGCAAGATGGAGGCGCTGATTTTGTACTATGACGACACCTACCCCAGTGTCAAGGAGATACAATGAAGGCTCCCCGAGACGAT	WT	TwoExp	id_uc010sot.1_57_WT	id_uc010sot.1_57_WT	id_uc010sot.1_57
ATGGGGTTCGGTATGCGCATGTATCTGGTATTTAAGTAATCTGAACCAGTTCTGCAAGTGACTGTGTTTTGTATTACTGTGAAGCTCTCTTAAGGCTCCCCGAGACGAT	WT	TwoExp	id_uc002qzx.3_1166_WT	id_uc002qzx.3_1166_WT	id_uc002qzx.3_1166
ATGGGGTTCGGTATGCGCCATATCCCCCCAATATTGGGTGCCCTGGAGGTTCCAATCCTGCCCACCCACCACCTATTAATCCAGATGTGGTAAGGCTCCCCGAGACGAT	WT	IdentifiedTRUB1	id_uc001scz.4_235_WT	id_uc001scz.4_235_WT	id_uc001scz.4_235
ATGGGGTTCGGTATGCGCCATATCCCCCCAATATTGGGTGCCCTGGAGGTTCCAATCCTGCCCACCCACCACCTATTAATCCAGATGTGGTAAGGCTCCCCGAGACGAT	WT	TwoExp	id_uc001scz.4_235_WT	id_uc001scz.4_235_WT	id_uc001scz.4_235
ATGGGGTTCGGTATGCGCCATATCCCCCCAATATTGGGTGCCCTGGAGGTTCCAATCCTGCCCACCCACCACCTATTAATCCACGAATGTAAAGGCTCCCCGAGACGAT	WT	IdentifiedTRUB1	id_uc001scz.4_235_WT	id_uc001sda.4_131_WT	id_uc001sda.4_131
ATGGGGTTCGGTATGCGCCATATCCCCCCAATATTGGGTGCCCTGGAGGTTCCAATCCTGCCCACCCACCACCTATTAATCCACGAATGTAAAGGCTCCCCGAGACGAT	WT	TwoExp	id_uc001scz.4_235_WT	id_uc001sda.4_131_WT	id_uc001sda.4_131
ATGGGGTTCGGTATGCGCTATTTTCCCATTAAAATTTGAAAAATACACTTTTCTTTGCTTCTACCCTTGCAGTTTCCCTTAGTTCCGTGAAAAGGCTCCCCGAGACGAT	WT	TwoExp	id_uc003pir.3_9453_WT	id_uc003pir.3_9453_WT	id_uc003pir.3_9453
ATGGGGTTCGGTATGCGCGGTTGCTGCTGATAATCAGGACACCAGTAATTTACCTCAGTTAGCTGTACCAGCACCTCGAGTTTCCCAATCCAAGGCTCCCCGAGACGAT	WT	TwoExp	id_uc003lfs.2_6523_WT	id_uc003lfs.2_6523_WT	id_uc003lfs.2_6523
ATGGGGTTCGGTATGCGCAGCATGGGATATGAGGGAAATCCTCAGCAGTATTAATTTTGCATTCCAATTTCATGTTGATGATAGGCCCTGGAAGGCTCCCCGAGACGAT	WT	TwoExp	id_uc001pec.3_1132_WT	id_uc001pec.3_1132_WT	id_uc001pec.3_1132
ATGGGGTTCGGTATGCGCCAGGTCTAGACTATTAGGTGCAATTTCAAGGTTCTAACCCTATACTGTAGTATTCTTTGGGGTGCTCCTATGCAAGGCTCCCCGAGACGAT	WT	TwoExp	id_uc010ehj.3_4476_WT	id_uc010ehj.3_4476_WT	id_uc010ehj.3_4476
ATGGGGTTCGGTATGCGCCAGGTCTAGACTATTAGGTGCAATTTCAAGGTTCTAACCCTATACTGTAGTATTCTTTGGGGTGCTCCTATGCAAGGCTCCCCGAGACGAT	WT	IdentifiedTRUB1	id_uc010ehj.3_4476_WT	id_uc010ehj.3_4476_WT	id_uc010ehj.3_4476
ATGGGGTTCGGTATGCGCCAGGTCTAGACTATTAGGTGCAATTTCAAGGTTCTAACCCTATACTGTAGTATTCTTTGGGGTGCTGTAACAAAAGGCTCCCCGAGACGAT	WT	TwoExp	id_uc010ehj.3_4476_WT	id_uc010ehj.3_4476_WT	id_uc010ehj.3_4476
ATGGGGTTCGGTATGCGCCAGGTCTAGACTATTAGGTGCAATTTCAAGGTTCTAACCCTATACTGTAGTATTCTTTGGGGTGCTGTAACAAAAGGCTCCCCGAGACGAT	WT	IdentifiedTRUB1	id_uc010ehj.3_4476_WT	id_uc010ehj.3_4476_WT	id_uc010ehj.3_4476
ATGGGGTTCGGTATGCGCAGCACTTGATTTGCTGGGTTTGGAAAACTCCTTTTTTGGCCTTCTATGTGCTTAGCCATAACAATTCACGTGGAAGGCTCCCCGAGACGAT	WT	TwoExp	id_uc001iha.3_3652_WT	id_uc001iha.3_3652_WT	id_uc001iha.3_3652
ATGGGGTTCGGTATGCGCGTCTTCCAGTGGAGGCATAATTGGCACTGGAATAGATGAACTGCAGAAGAGGGTGCCAAAATTGAGGACGTATAAGGCTCCCCGAGACGAT	WT	Pus1	id_uc001gve.3_1472_WT	id_uc001gve.3_1472_WT	id_uc001gve.3_1472
ATGGGGTTCGGTATGCGCTTTTCACTTGTTATTTTTCTTTAGACCGTAGCTTTATGGGATCTGCGTAACTTAAAATTAAAACTCTATGTTTAAGGCTCCCCGAGACGAT	WT	TwoExp	id_uc010nez.3_1514_WT	id_uc010nez.3_1514_WT	id_uc010nez.3_1514
ATGGGGTTCGGTATGCGCCCAAATACATCCTCATGTGCACAGGAAGAGGTTCTAGTCCTCTGTAACATATCCCAAACAAAGCCAAGTAGTTAAGGCTCCCCGAGACGAT	WT	PredictedTRUB1	id_uc003bzo.1_3294_WT	id_uc003bzo.1_3294_WT	id_uc003bzo.1_3294
ATGGGGTTCGGTATGCGCATACAGAGTCAATATATTTTTTCAGAGAAAGTTATTCGCTCGATTTTTTCTGAATCATAATTAAACCTCTCTCAAGGCTCCCCGAGACGAT	WT	TwoExp	id_uc002klr.3_1183_WT	id_uc002klr.3_1183_WT	id_uc002klr.3_1183
ATGGGGTTCGGTATGCGCATTTCTTCCTTGTTGTTTGCTTTGGTCTGTGTTCAATCCAGAGAGCTTAAATTGTCATTATTTTGCCTCACCGAAGGCTCCCCGAGACGAT	WT	PredictedTRUB1	id_uc002kms.1_1923_WT	id_uc002kms.1_1923_WT	id_uc002kms.1_1923
ATGGGGTTCGGTATGCGCAGCGTGGATGAAGTGGAGATTAGTGTGAGCCTTGCCAAAGATGAGCCTGACACAAATCTCGTGGCCGCATTTCAAGGCTCCCCGAGACGAT	WT	TwoExp	id_uc001xtw.3_530_WT	id_uc001xtw.3_530_WT	id_uc001xtw.3_530
ATGGGGTTCGGTATGCGCCGGAAGCTGCTGCTGGACCCTAGCAGCCCCCCTACCAAAGCTCTCAATGGAGCCGAGCCCAACTATAATGCGTAAGGCTCCCCGAGACGAT	WT	TwoExp	id_uc001ort.3_251_WT	id_uc001ort.3_251_WT	id_uc001ort.3_251
ATGGGGTTCGGTATGCGCGCTTGTCAAGCTATAACCACAAAAATAATGAATTGATGAGAAATACAATGAAGAGGCAATGTCCACGTATAAGAAGGCTCCCCGAGACGAT	WT	TwoExp	id_uc010roh.2_5161_WT	id_uc010roh.2_5161_WT	id_uc010roh.2_5161
ATGGGGTTCGGTATGCGCGCTTGTCAAGCTATAACCACAAAAATAATGAATTGATGAGAAATACAATGAAGAGGCAATGTCCACGTATAAGAAGGCTCCCCGAGACGAT	WT	Dkc1	id_uc010roh.2_5161_WT	id_uc010roh.2_5161_WT	id_uc010roh.2_5161
ATGGGGTTCGGTATGCGCGCTTGTCAAGCTATAACCACAAAAATAATGAATTGATGAGAAATACAATGAAGAGGCAATGTCCACCTCACATAAGGCTCCCCGAGACGAT	WT	TwoExp	id_uc010roh.2_5161_WT	id_uc010roh.2_5161_WT	id_uc010roh.2_5161
ATGGGGTTCGGTATGCGCGCTTGTCAAGCTATAACCACAAAAATAATGAATTGATGAGAAATACAATGAAGAGGCAATGTCCACCTCACATAAGGCTCCCCGAGACGAT	WT	Dkc1	id_uc010roh.2_5161_WT	id_uc010roh.2_5161_WT	id_uc010roh.2_5161
ATGGGGTTCGGTATGCGCTGTTTCTCCAGCCCAGCGGACGACAGCATGGATCGGTGAAACCAGGTGGCTTCTTGCCCCCTTCTGGTAATCAAAGGCTCCCCGAGACGAT	WT	TwoExp	id_uc002qkd.3_1409_WT	id_uc002qkd.3_1409_WT	id_uc002qkd.3_1409
ATGGGGTTCGGTATGCGCCAATTGAAATATTTTGTCTTAAATCACTTGGTTCAATACATGCTTATTTGTTTTAAAACCTGTATAATAGGGAAAGGCTCCCCGAGACGAT	WT	PredictedTRUB1	id_uc004eqd.3_3087_WT	id_uc004eqd.3_3087_WT	id_uc004eqd.3_3087
ATGGGGTTCGGTATGCGCCCTGCACTGAAGGTCCCCGCCTTGCTCCCAGTTCCATCCTGGCCAATAGGCTGCGCCTCAAGAGGGGTAGAAAAAGGCTCCCCGAGACGAT	WT	TwoExp	id_uc001kxj.1_9656_WT	id_uc001kxj.1_9656_WT	id_uc001kxj.1_9656
ATGGGGTTCGGTATGCGCCCTGCACTGAAGGTCCCCGCCTTGCTCCCAGTTCCATCCTGGCCAATAGGCTGCGCCTCAAGAGGGGTAGAAAAAGGCTCCCCGAGACGAT	WT	IdentifiedTRUB1	id_uc001kxj.1_9656_WT	id_uc001kxj.1_9656_WT	id_uc001kxj.1_9656
ATGGGGTTCGGTATGCGCCCTGCACTGAAGGTCCCCGCCTTGCTCCCAGTTCCATCCTGGCCAATAGGCTGCGCCTCAAGAGGGCCTACTAAAGGCTCCCCGAGACGAT	WT	TwoExp	id_uc001kxj.1_9656_WT	id_uc001kxj.1_9656_WT	id_uc001kxj.1_9656
ATGGGGTTCGGTATGCGCCCTGCACTGAAGGTCCCCGCCTTGCTCCCAGTTCCATCCTGGCCAATAGGCTGCGCCTCAAGAGGGCCTACTAAAGGCTCCCCGAGACGAT	WT	IdentifiedTRUB1	id_uc001kxj.1_9656_WT	id_uc001kxj.1_9656_WT	id_uc001kxj.1_9656
ATGGGGTTCGGTATGCGCGGAAATGCCAATGGGCAAAGAGCTACTTTGAATACATAATTCTCTTCAAAGACTTCAGCAGCAAATCTTTTGGAAGGCTCCCCGAGACGAT	WT	TwoExp	id_uc021vjw.1_2281_WT	id_uc021vjw.1_2281_WT	id_uc021vjw.1_2281
ATGGGGTTCGGTATGCGCGCCCTGATTGTGGGAAGAGTTTTAGTCAGAGTTCCAGCCTCATTCGCCACCAGCGGACACACACATTAATCCCAAGGCTCCCCGAGACGAT	WT	PredictedTRUB1	id_uc003yrr.3_1009_WT	id_uc003yrr.3_1009_WT	id_uc003yrr.3_1009
ATGGGGTTCGGTATGCGCCAGGGGAAGTTCTGATTCCCTTAGCTGACGAATATGACCCTATGTTTCCTAATGATTATGAGAAAATGGCTAAAAGGCTCCCCGAGACGAT	WT	TwoExp	id_uc001ijb.3_525_WT	id_uc001ijb.3_525_WT	id_uc001ijb.3_525
ATGGGGTTCGGTATGCGCCGAAGCCGCCTCCACGGCCCCGGGCGGCCGCCTGAGTAAGGACTTCTGCGCGCGGGAGTTCGAGGGTTAATGAAAGGCTCCCCGAGACGAT	WT	CTGsites	id_uc010dib.1_126_WT	id_uc010dib.1_126_WT	id_uc010dib.1_126
ATGGGGTTCGGTATGCGCCGAAGCCGCCTCCACGGCCCCGGGCGGCCGCCTGAGTAAGGACTTCTGCGCGCGGGAGTTCGAGGGGGGTTCGAAGGCTCCCCGAGACGAT	WT	CTGsites	id_uc010dib.1_126_WT	id_uc010dib.1_126_WT	id_uc010dib.1_126
ATGGGGTTCGGTATGCGCTGGCAGAATTCCCTGTGGTCGCCTGGGGACTGTAGAAGAACTCGCAAATCTTGCTGCTTTCCTTTTGCTCACGAAGGCTCCCCGAGACGAT	WT	TwoExp	id_uc003yek.1_963_WT	id_uc003yek.1_963_WT	id_uc003yek.1_963
ATGGGGTTCGGTATGCGCCTGTTTGTCTGTATCGTCAGGTGGGATAATCCTTACCTGTTCCTCCTCCGGAGGGCAGATTAGAACTTGCCCGAAGGCTCCCCGAGACGAT	WT	TwoExp	id_uc002gkh.4_1187_WT	id_uc002gkh.4_1187_WT	id_uc002gkh.4_1187
ATGGGGTTCGGTATGCGCCACTGGGAACCCTGATGTCTTCAGGGGCCTCTTTATCATCGATGGCAAGGGTGTCCTTCGCCAGACGCGCAGAAAGGCTCCCCGAGACGAT	WT	TwoExp	id_uc002mve.1_1343_WT	id_uc002mve.1_1343_WT	id_uc002mve.1_1343
ATGGGGTTCGGTATGCGCATGTGAACTCCTTAACTCATCAAGTAAGGTGGTACTCAAGCCATGCTGCCTCCTTACATCCTTTTTAGTCCAAAAGGCTCCCCGAGACGAT	WT	TwoExp	id_uc002xof.3_1355_WT	id_uc002xof.3_1355_WT	id_uc002xof.3_1355
ATGGGGTTCGGTATGCGCTGGGGGGACAGGCTCTGGACTGGGTTCCTACCTCTTAGAACGGCTGAATGACAGGTATCCTAAGATTACTCTGAAGGCTCCCCGAGACGAT	WT	Dkc1	id_uc002ian.3_857_WT	id_uc002ian.3_857_WT	id_uc002ian.3_857
ATGGGGTTCGGTATGCGCGCCCTTCTTGACCACGGCAGCCTCCTGTCTTCTAGGAGCTATCAAGGGTCTCTAAGAACTGGGCACTGGGTGAAAGGCTCCCCGAGACGAT	WT	Pus1	id_uc001ktn.3_708_WT	id_uc001ktn.3_708_WT	id_uc001ktn.3_708
ATGGGGTTCGGTATGCGCTCCTGCCTCAGATTCTTGAGTAGCCAGGACTATAGGCACATACCACCATGCCCAACTAATTTTTACCGCCCCCAAGGCTCCCCGAGACGAT	WT	TwoExp	id_uc001vrq.3_450_WT	id_uc001vrq.3_450_WT	id_uc001vrq.3_450
ATGGGGTTCGGTATGCGCCTAGAACTTTTAAAGATTCCCAATTTTCTGCATTTGACTCCTGTAGCAATTAAAAAGCACTGTGAAGGGATACAAGGCTCCCCGAGACGAT	WT	TwoExp	id_uc001rih.3_411_WT	id_uc001rih.3_411_WT	id_uc001rih.3_411
ATGGGGTTCGGTATGCGCACGCCTCATAGAGTAACTCTGTGGTTTTACTTTACTCACAGGACTATTGTTAGATCTGTGGGAAGGACTGAGGAAGGCTCCCCGAGACGAT	WT	TwoExp	id_uc001pec.3_2336_WT	id_uc001pec.3_2336_WT	id_uc001pec.3_2336
ATGGGGTTCGGTATGCGCATGAATATGGATCTGCCATAAGAAAATCTAGTTCAACTCTAATTTTATGTAGTAAATAAATTGGCCGTAAGTAAAGGCTCCCCGAGACGAT	WT	PredictedTRUB1	id_uc001eds.3_3379_WT	id_uc001eds.3_3379_WT	id_uc001eds.3_3379
ATGGGGTTCGGTATGCGCACAAATTCTGGAAATACTAAATAGTACTGGTGTTGAATATGAAACATTCGATATATTGGAGGATGCGAGTACTAAGGCTCCCCGAGACGAT	WT	TwoExp	id_uc001lkm.2_874_WT	id_uc001lkm.2_874_WT	id_uc001lkm.2_874
ATGGGGTTCGGTATGCGCGGCAAATCCTGATCCTAACTGTTGTCTTGGAGTATTTGGGCTGAGCTTGTACACCACAGAAAGAGAGTTTGTCAAGGCTCCCCGAGACGAT	WT	TwoExp	id_uc003fpt.3_1313_WT	id_uc003fpt.3_1313_WT	id_uc003fpt.3_1313
ATGGGGTTCGGTATGCGCCGCATATCCCTGCTCGGCGCTGCCCGCCCAGTTCCTGTTCCCAGACTGAGGCCCAGCCCCCTTCGGCCGGTATAAGGCTCCCCGAGACGAT	WT	TwoExp	id_uc002xai.3_81_WT	id_uc002xai.3_81_WT	id_uc002xai.3_81
ATGGGGTTCGGTATGCGCTCTCGAGATATAGATGTGATTAGAGGGAATATTGTCAAACACCCTCTGACCCAGGAACTAAAAGATTGTTGTGAAGGCTCCCCGAGACGAT	WT	TwoExp	id_uc002ytp.2_458_WT	id_uc002ytp.2_458_WT	id_uc002ytp.2_458
ATGGGGTTCGGTATGCGCAGCCAGCACGCCAAGTACACTTGCTCTTTCTGTGGCAAAACCAAGATGAAGAGACGAGCTGTGGGCCACACATAAGGCTCCCCGAGACGAT	WT	TwoExp	id_uc002vgf.3_205_WT	id_uc002vgf.3_205_WT	id_uc002vgf.3_205
ATGGGGTTCGGTATGCGCGCTTTATGGTACCTGGCTACCTCCTGGTGCAGTACTTCAGGCGGAAGAACTACCTGGAGACCGGTGAATTAATAAGGCTCCCCGAGACGAT	WT	Pus1	id_uc003oxd.3_312_WT	id_uc003oxd.3_312_WT	id_uc003oxd.3_312
ATGGGGTTCGGTATGCGCGCTTTATGGTACCTGGCTACCTCCTGGTGCAGTACTTCAGGCGGAAGAACTACCTGGAGACCGGTGAATTAATAAGGCTCCCCGAGACGAT	WT	TwoExp	id_uc003oxd.3_312_WT	id_uc003oxd.3_312_WT	id_uc003oxd.3_312
ATGGGGTTCGGTATGCGCGCTTTATGGTACCTGGCTACCTCCTGGTGCAGTACTTCAGGCGGAAGAACTACCTGGAGACCGGTTTGTCCCGAAGGCTCCCCGAGACGAT	WT	Pus1	id_uc003oxd.3_312_WT	id_uc003oxd.3_312_WT	id_uc003oxd.3_312
ATGGGGTTCGGTATGCGCGCTTTATGGTACCTGGCTACCTCCTGGTGCAGTACTTCAGGCGGAAGAACTACCTGGAGACCGGTTTGTCCCGAAGGCTCCCCGAGACGAT	WT	TwoExp	id_uc003oxd.3_312_WT	id_uc003oxd.3_312_WT	id_uc003oxd.3_312
ATGGGGTTCGGTATGCGCGAAGCTCTCCCTGGGCTTCTCTCTCTTCTAGTTCTATTCTAGTCTTTTTTTATTGAGTCCTCCTCCCCCTCGTAAGGCTCCCCGAGACGAT	WT	PredictedTRUB1	id_uc003zra.3_3467_WT	id_uc003zra.3_3467_WT	id_uc003zra.3_3467
ATGGGGTTCGGTATGCGCGCCAATGATGGAAACCCAGATGACAGCTGGTGTTGATGGTCATTCCTGGGCTCTTTCTGCGATAGATCCGCTGAAGGCTCCCCGAGACGAT	WT	TwoExp	id_uc003jku.1_1480_WT	id_uc003jku.1_1480_WT	id_uc003jku.1_1480
ATGGGGTTCGGTATGCGCGTCCATTTCCAGACTGCGAGAGGCCTTTTCTCTTCGTCACACAACAGAGAACAAGCCTCACAGCCGCTAACCCAAGGCTCCCCGAGACGAT	WT	Pus1	id_uc011jxb.1_894_WT	id_uc011jxb.1_894_WT	id_uc011jxb.1_894
ATGGGGTTCGGTATGCGCAGGCGTCGATCCGACTCCCGTCACAGTACAACTTTGCCATGAACGTGCTCGGCCGGGTAAAAGGCCCTCGCTAAAGGCTCCCCGAGACGAT	WT	Dkc1	id_uc003bxv.1_3799_WT	id_uc003bxv.1_3799_WT	id_uc003bxv.1_3799
ATGGGGTTCGGTATGCGCAGGCGTCGATCCGACTCCCGTCACAGTACAACTTTGCCATGAACGTGCTCGGCCGGGTAAAAGGCCCTCGCTAAAGGCTCCCCGAGACGAT	WT	TwoExp	id_uc003bxv.1_3799_WT	id_uc003bxv.1_3799_WT	id_uc003bxv.1_3799
ATGGGGTTCGGTATGCGCAGGCGTCGATCCGACTCCCGTCACAGTACAACTTTGCCATGAACGTGCTCGGCCGGGTAAAAGGCAACACTTTAAGGCTCCCCGAGACGAT	WT	Dkc1	id_uc003bxv.1_3799_WT	id_uc003bxv.1_3799_WT	id_uc003bxv.1_3799
ATGGGGTTCGGTATGCGCAGGCGTCGATCCGACTCCCGTCACAGTACAACTTTGCCATGAACGTGCTCGGCCGGGTAAAAGGCAACACTTTAAGGCTCCCCGAGACGAT	WT	TwoExp	id_uc003bxv.1_3799_WT	id_uc003bxv.1_3799_WT	id_uc003bxv.1_3799
ATGGGGTTCGGTATGCGCAGCACTTCCTGCCAATGCCATCTTAAATCAGTTCCAGCCTGCAGCGGGTGGCTACTTTGTGCCAGCAGATACTAAGGCTCCCCGAGACGAT	WT	IdentifiedTRUB1	id_uc001cdl.2_2101_WT	id_uc001cdl.2_2101_WT	id_uc001cdl.2_2101
ATGGGGTTCGGTATGCGCAGCACTTCCTGCCAATGCCATCTTAAATCAGTTCCAGCCTGCAGCGGGTGGCTACTTTGTGCCAGCAGATACTAAGGCTCCCCGAGACGAT	WT	TwoExp	id_uc001cdl.2_2101_WT	id_uc001cdl.2_2101_WT	id_uc001cdl.2_2101
ATGGGGTTCGGTATGCGCAGCACTTCCTGCCAATGCCATCTTAAATCAGTTCCAGCCTGCAGCGGGTGGCTACTTTGTGCCAGGGTTGAGCAAGGCTCCCCGAGACGAT	WT	IdentifiedTRUB1	id_uc001cdl.2_2101_WT	id_uc001cdl.2_2101_WT	id_uc001cdl.2_2101
ATGGGGTTCGGTATGCGCAGCACTTCCTGCCAATGCCATCTTAAATCAGTTCCAGCCTGCAGCGGGTGGCTACTTTGTGCCAGGGTTGAGCAAGGCTCCCCGAGACGAT	WT	TwoExp	id_uc001cdl.2_2101_WT	id_uc001cdl.2_2101_WT	id_uc001cdl.2_2101
ATGGGGTTCGGTATGCGCGTTTCACCAGCTGGAGTGAGTTGCAAGGAAGATTGCTGGAGCTACTCAATCTAGCGCTAATGGTTTAGGCAGAAAGGCTCCCCGAGACGAT	WT	TwoExp	id_uc001vgs.3_2927_WT	id_uc001vgs.3_2927_WT	id_uc001vgs.3_2927
ATGGGGTTCGGTATGCGCTGGCCATGCCTGGCTCTAGGCTTTGGGACAGTTCAACTCTGTTCCACATGTCTGATTCTGGATCCAAGTATAAAAGGCTCCCCGAGACGAT	WT	PredictedTRUB1	id_uc003abv.3_624_WT	id_uc003abv.3_624_WT	id_uc003abv.3_624
ATGGGGTTCGGTATGCGCGCAGAAAAGCAATCAGGTTGCCTTCCAACATTTCCAAGAACTAGATGAGCACATTAGCTATGTAGCGATGCATAAGGCTCCCCGAGACGAT	WT	Pus1	id_uc001xct.3_539_WT	id_uc001xct.3_539_WT	id_uc001xct.3_539
ATGGGGTTCGGTATGCGCTCCTCCTCCTCGTCCTCATCCTCCTCGTCCTCTTCATCCTCTGAGTCCTCCTCTGAAGATGAAGATTCGAGAGAAGGCTCCCCGAGACGAT	WT	Dkc1	id_uc002ead.1_3852_WT	id_uc002ead.1_3852_WT	id_uc002ead.1_3852
ATGGGGTTCGGTATGCGCATTCTTTACTGTGGAATAGCTCAAAATGTCCATTCTGTTTTAAGTAACAGAATTGATAACTGAGCGGGTTACCAAGGCTCCCCGAGACGAT	WT	TwoExp	id_uc001upy.3_2338_WT	id_uc001upy.3_2338_WT	id_uc001upy.3_2338
ATGGGGTTCGGTATGCGCCCACTATTTACAAACAAGACCCTTCTAAACAGTATGGACTGAAAATGAAAACTTCACGTGCCTTCAAAGTGGGAAGGCTCCCCGAGACGAT	WT	TwoExp	id_uc003fay.1_2053_WT	id_uc003fay.1_2053_WT	id_uc003fay.1_2053
ATGGGGTTCGGTATGCGCACAGGCATGAGCCACCGTGCCCGGCCTCAAGTTCAAATCTTGAATTAGAAGACATTTGATTATTGTGCCACGTAAGGCTCCCCGAGACGAT	WT	PredictedTRUB1	id_uc001xsj.1_2365_WT	id_uc001xsj.1_2365_WT	id_uc001xsj.1_2365
ATGGGGTTCGGTATGCGCGCCCCAGGCATGGCAAGCGCCTGCCTCTCCCCTTCCGGTGCTCACACGCCCACGCCGTGCCACCCTGTCACACAAGGCTCCCCGAGACGAT	WT	TwoExp	id_uc002cgf.3_2724_WT	id_uc002cgf.3_2724_WT	id_uc002cgf.3_2724
ATGGGGTTCGGTATGCGCGCAGCACCATGCAACAGAAGAACCTTGAAGGCTATGTGGGATTTGCCAATCTCCCAAATCAAGTAAGGACCACAAGGCTCCCCGAGACGAT	WT	TwoExp	id_uc010kxc.3_307_WT	id_uc010kxc.3_307_WT	id_uc010kxc.3_307
ATGGGGTTCGGTATGCGCTAATCAGAAGGGCATGTTTCCAGGGGAGCAGTTTAAGCCTGCCCGGAGGCCGTGGACCCTCCTGATGATAATAAAGGCTCCCCGAGACGAT	WT	TwoExp	id_uc002zdv.3_1119_WT	id_uc002zdv.3_1119_WT	id_uc002zdv.3_1119
ATGGGGTTCGGTATGCGCTAGGCCAGGCTCTGGAGCTAAGCTGCATGGGTTCAAATCCCAGCTCCACCATTCAGCCTGCAGAGCATTAGTAAAGGCTCCCCGAGACGAT	WT	PredictedTRUB1	id_uc002oxm.4_1286_WT	id_uc002oxm.4_1286_WT	id_uc002oxm.4_1286
ATGGGGTTCGGTATGCGCAGCACTGGCCTGGGAGTCAGACAGACCTGGGTTCAAGTCCTCAGTCCCCTGCCCACTCCCTACGTAAGGTAGCAAGGCTCCCCGAGACGAT	WT	IdentifiedTRUB1	id_uc004ays.3_4495_WT	id_uc004ays.3_4495_WT	id_uc004ays.3_4495
ATGGGGTTCGGTATGCGCTTTTTTATTAACAGCTCTGTGCTAGTTTTTTTTTTCTGTTTTAGCCTCATCCCAAATATAAAGCTCGAGCCCAAAGGCTCCCCGAGACGAT	WT	TwoExp	id_uc003xih.2_1974_WT	id_uc003xih.2_1974_WT	id_uc003xih.2_1974
ATGGGGTTCGGTATGCGCTCAACTTGTTGGACCGGAGTCCATAGCACATATTGGGGATGTGATGTTTACTGGGACAGCAGATGTGCATGTAAAGGCTCCCCGAGACGAT	WT	Pus1	id_uc002wty.3_425_WT	id_uc002wty.3_425_WT	id_uc002wty.3_425
ATGGGGTTCGGTATGCGCTGCTGCTGTTTGGTGACATCCGACAGGGCATCTTCTATGCGATGCTTCTGTCCTTCTGGATCATCTTTTAAAGAAGGCTCCCCGAGACGAT	WT	TwoExp	id_uc001def.2_1222_WT	id_uc001def.2_1222_WT	id_uc001def.2_1222
ATGGGGTTCGGTATGCGCTTTGCCTCGCGGTTTCTTTCTTTCCGCGCCGATAGCGCTCACGCAAGCATGGTTAACGTCCCTAAGGCAGGATAAGGCTCCCCGAGACGAT	WT	TwoExp	id_uc022cah.1_140_WT	id_uc022cah.1_140_WT	id_uc022cah.1_140
ATGGGGTTCGGTATGCGCCATCTGACATCTGCTGCTGATGAAGGTGCTGTTCAAGTCAGTAGAAGAACCATTTCTTCGAATTCTATAACGCAAGGCTCCCCGAGACGAT	WT	PredictedTRUB1	id_uc001vbe.4_1033_WT	id_uc001vbe.4_1033_WT	id_uc001vbe.4_1033
ATGGGGTTCGGTATGCGCTAAACCGAGCACTGATGCTGGACTTCATGATTTTTACCCTCCCTTTGGCAAGGCTTTGTCTCACTAGGCGCCGAAGGCTCCCCGAGACGAT	WT	TwoExp	id_uc004blc.3_1417_WT	id_uc004blc.3_1417_WT	id_uc004blc.3_1417
ATGGGGTTCGGTATGCGCCTCGCCTGCCCGCCATGGCCGACAAGGAAGCCTTCGACGACGCAGTGGAAGAACGAGTGATCAACTCCGTAGAAAGGCTCCCCGAGACGAT	WT	TwoExp	id_uc001bvs.3_179_WT	id_uc001bvs.3_179_WT	id_uc001bvs.3_179
ATGGGGTTCGGTATGCGCGCTGGTGAAGGGCATGAACTTCTCGGTGGTGGTATTTGACACGGCACCCACGGGCCACACCCTGAGGCTGGTCAAGGCTCCCCGAGACGAT	WT	TwoExp	id_uc002muv.3_506_WT	id_uc002muv.3_506_WT	id_uc002muv.3_506
ATGGGGTTCGGTATGCGCTTCTCTTCAAAGCGCATAAATCTTTCGCCTTTTACTAAAGATTTCCGTGGAGAGAAAGTTGTGAGCCAAGAAGAAGGCTCCCCGAGACGAT	WT	TwoExp	id_uc021omv.1_4188_WT	id_uc021omv.1_4188_WT	id_uc021omv.1_4188
ATGGGGTTCGGTATGCGCCTGGCCCTGGGACTCTGACCCTCGGCTACCCTTTCCTGCCCCACTAGCGTGGCCGCGAGCCTCGGATTTTGTCAAGGCTCCCCGAGACGAT	WT	TwoExp	id_uc003nlr.3_97_WT	id_uc003nlr.3_97_WT	id_uc003nlr.3_97
ATGGGGTTCGGTATGCGCAAGGTGCTGTGTAATCATTAAGGAGCGGAGGCTTTTGGAGCTGCTAAAATGCCGGATTACCTCGGGGATATGCAAGGCTCCCCGAGACGAT	WT	TwoExp	id_uc003vbs.3_174_WT	id_uc003vbs.3_174_WT	id_uc003vbs.3_174
ATGGGGTTCGGTATGCGCCGACCAGAATCCGTGAACATGGCGAACGAGGTTATCAAGTGCAAGGCTGCAGTTGCTTGGGAGGCCGGGCTTAAAGGCTCCCCGAGACGAT	WT	TwoExp	id_uc003hui.3_96_WT	id_uc003hui.3_96_WT	id_uc003hui.3_96
ATGGGGTTCGGTATGCGCGAGGAGCGGACCTGTAAAACTAGAATTTGATGTATCTGATGGCGCCACCAGCAAAAGGGCACCCCAGTCCAGAAAGGCTCCCCGAGACGAT	WT	TwoExp	id_uc003gdo.3_1181_WT	id_uc003gdo.3_1181_WT	id_uc003gdo.3_1181
ATGGGGTTCGGTATGCGCTTTGTCCCTTGCCATCATGCCCAACAAGAGGTTCTATACCTTTTAATGAATTGACTTTCATAAATGGCAAGCGAAGGCTCCCCGAGACGAT	WT	TwoExp	id_uc021tqz.1_1045_WT	id_uc021tqz.1_1045_WT	id_uc021tqz.1_1045
ATGGGGTTCGGTATGCGCCTGGGGCAGTACAGACAGTAGAGTTCTTCGGCTACTCCTTACTCACTGGTTATGTCTTCTTCCTCTCGCCAGGAAGGCTCCCCGAGACGAT	WT	TwoExp	id_uc001wmv.1_288_WT	id_uc001wmv.1_288_WT	id_uc001wmv.1_288
ATGGGGTTCGGTATGCGCAGGCGGGCACATGCGCCTCCTCTTCCTCCTGTTCCACCCAGCATTCCATCATCATCACCAAGGGTAGATGCACAAGGCTCCCCGAGACGAT	WT	PredictedTRUB1	id_uc001smk.3_1161_WT	id_uc001smk.3_1161_WT	id_uc001smk.3_1161
ATGGGGTTCGGTATGCGCTGTGCTTCCACCCGCGCCGGGAGTCCCACTGGTCTAGAACCCGGCTCTGAGGGCACTGGCCTAGTGCCCTATTAAGGCTCCCCGAGACGAT	WT	TwoExp	id_uc010bzk.1_847_WT	id_uc010bzk.1_847_WT	id_uc010bzk.1_847
ATGGGGTTCGGTATGCGCTGTATAACGTCCTGATGTACCGGCTCTCACGCTACGTGACCAAACCCAACTCAGATGATGAGGACTATGGACTAAGGCTCCCCGAGACGAT	WT	TwoExp	id_uc004dhp.3_1925_WT	id_uc004dhp.3_1925_WT	id_uc004dhp.3_1925
ATGGGGTTCGGTATGCGCTCTGCAACACCTGTCAACTCCATCTGCAGTGTTCAAGGCACTGTGGTTGGCGTGGACGAGAGCACTCAAAGAGAAGGCTCCCCGAGACGAT	WT	PredictedTRUB1	id_uc003xqd.3_2400_WT	id_uc003xqd.3_2400_WT	id_uc003xqd.3_2400
ATGGGGTTCGGTATGCGCGGCACCATTGAAATCCTGGGTGTCCGCAATGTTGCCAGTGTCTGTCTGCAGATTGGCTACCCAACAGACCCTGAAGGCTCCCCGAGACGAT	WT	Dkc1	id_uc001txr.3_658_WT	id_uc001txr.3_658_WT	id_uc001txr.3_658
ATGGGGTTCGGTATGCGCCATCACTGGCATGGACCGAGGCCTCATGGGCATGTGTGTCAACGAGCGGCGACGCCTCATTGTGCCCAGGGAGAAGGCTCCCCGAGACGAT	WT	TwoExp	id_uc002hxv.2_652_WT	id_uc002hxv.2_652_WT	id_uc002hxv.2_652
ATGGGGTTCGGTATGCGCGATTCTCGCTTCGGGTGCGAGAGGTCCCGGGTTCAAATCCCGGACGAGCCCTCCTTTACCTTTTAGACACAGTAAGGCTCCCCGAGACGAT	WT	PredictedTRUB1	id_uc002gkp.4_657_WT	id_uc002gkp.4_657_WT	id_uc002gkp.4_657
ATGGGGTTCGGTATGCGCTGGCCAACGGCCTGCAGAGCAACATGCCCAAGTTTTATTGTGACTACTGCGATACATACCTCACCCAAAGATCAAGGCTCCCCGAGACGAT	WT	TwoExp	id_uc003ojt.2_461_WT	id_uc003ojt.2_461_WT	id_uc003ojt.2_461
ATGGGGTTCGGTATGCGCCCCAAAGCCCTGGGGCAGCTGATCTCCAAGTATTCTCTACGGGAGCTGCACCTGTCATTCACACAAAGCGAGCAAGGCTCCCCGAGACGAT	WT	TwoExp	id_uc002xoh.2_331_WT	id_uc002xoh.2_331_WT	id_uc002xoh.2_331
ATGGGGTTCGGTATGCGCCACGTTGCTGAAGGTCCAGGCTTGCCTCAAGTTCCATGCTTGAGCAATAAAGTGGAAACAATAAATCGAAATCAAGGCTCCCCGAGACGAT	WT	TwoExp	id_uc001qkz.3_2230_WT	id_uc001qkz.3_2230_WT	id_uc001qkz.3_2230
ATGGGGTTCGGTATGCGCTCGAATTGAGCCATACATTCATGAAGGAGATATTCTCGAAAGACCTGACCTTTTCTACAACTCAGTCGGACAGAAGGCTCCCCGAGACGAT	WT	Pus1	id_uc001ggv.3_2413_WT	id_uc001ggv.3_2413_WT	id_uc001ggv.3_2413
ATGGGGTTCGGTATGCGCACCCACCAGTCCCGCTGCATTCTCGGCCGGGCTCTAGGCGCCATGGCTCCCCGCGGGAGGAAGCGTCCTGTGTAAGGCTCCCCGAGACGAT	WT	TwoExp	id_uc021qjj.1_338_WT	id_uc021qjj.1_338_WT	id_uc021qjj.1_338
ATGGGGTTCGGTATGCGCGACAGATGCCTTCAAGCTGAAACGCAAAGAGCTTAAAACACATTACCAGGCGGACATTGAGCGAACATAGGTAAAGGCTCCCCGAGACGAT	WT	TwoExp	id_uc002vnj.3_2459_WT	id_uc002vnj.3_2459_WT	id_uc002vnj.3_2459
ATGGGGTTCGGTATGCGCCCAGGGAAGGCTACAAGGTGCAGATTGATGAGTACGATTACTCCAAGCCCATCCAGGGGCAACAGGAACCAGTAAGGCTCCCCGAGACGAT	WT	TwoExp	id_uc011cmd.1_452_WT	id_uc011cmd.1_452_WT	id_uc011cmd.1_452
ATGGGGTTCGGTATGCGCATTTACGTTCCTATAAGTTTCTGAAGCCACGTTCAAATCGTAGCTCTACCACCAATGAGCTGCACCCCGGGGCAAGGCTCCCCGAGACGAT	WT	PredictedTRUB1	id_uc002wso.1_616_WT	id_uc002wso.1_616_WT	id_uc002wso.1_616
ATGGGGTTCGGTATGCGCACACACAGCACCTCTCGGCTGCTCCAGCTCTGTAGGATAGCCTCCCCTGGGGTCCGTGGGACGCGTGAATCTCAAGGCTCCCCGAGACGAT	WT	TwoExp	id_uc021qzy.1_3340_WT	id_uc021qzy.1_3340_WT	id_uc021qzy.1_3340
ATGGGGTTCGGTATGCGCGGCTGCTCCCCCCACAGGCGCTCAATGCCTACTATCTACCCAACAAGAACCAGATGGTGTTCCCCGACCAATAAAGGCTCCCCGAGACGAT	WT	Dkc1	id_uc002vsv.2_1926_WT	id_uc002vsv.2_1926_WT	id_uc002vsv.2_1926
ATGGGGTTCGGTATGCGCGGCTGCTCCCCCCACAGGCGCTCAATGCCTACTATCTACCCAACAAGAACCAGATGGTGTTCCCCGACCAATAAAGGCTCCCCGAGACGAT	WT	TwoExp	id_uc002vsv.2_1926_WT	id_uc002vsv.2_1926_WT	id_uc002vsv.2_1926
ATGGGGTTCGGTATGCGCGGCTGCTCCCCCCACAGGCGCTCAATGCCTACTATCTACCCAACAAGAACCAGATGGTGTTCCCCAGGTGCGAAAGGCTCCCCGAGACGAT	WT	Dkc1	id_uc002vsv.2_1926_WT	id_uc002vsv.2_1926_WT	id_uc002vsv.2_1926
ATGGGGTTCGGTATGCGCGGCTGCTCCCCCCACAGGCGCTCAATGCCTACTATCTACCCAACAAGAACCAGATGGTGTTCCCCAGGTGCGAAAGGCTCCCCGAGACGAT	WT	TwoExp	id_uc002vsv.2_1926_WT	id_uc002vsv.2_1926_WT	id_uc002vsv.2_1926
ATGGGGTTCGGTATGCGCAGAAAACAGATTTTATGTGTTAATGTTAAAAATTTTGCAGTTATTTATCTTGTGGATATTACAGACAGTACATAAGGCTCCCCGAGACGAT	WT	TwoExp	id_uc010drf.3_452_WT	id_uc010drf.3_452_WT	id_uc010drf.3_452
ATGGGGTTCGGTATGCGCGCATGTGTGCGCGGGTGTATGTGCGCTCAGGGTCTCTGTTTAAGTATCAGCTAAAGATGTGCTTCATAGACTAAAGGCTCCCCGAGACGAT	WT	Pus1	id_uc010sfe.2_2521_WT	id_uc010sfe.2_2521_WT	id_uc010sfe.2_2521
ATGGGGTTCGGTATGCGCAAGAAGCTGCTTAGTTATATCCAGCGATTGGTTCAAATCCACGTTGATACAATGAAGGTAATTAATCTCGAACAAGGCTCCCCGAGACGAT	WT	TwoExp	id_uc002xgh.2_525_WT	id_uc002xgh.2_525_WT	id_uc002xgh.2_525
ATGGGGTTCGGTATGCGCAGGCCATCCAGGAAGCCCTGGATTTAAAGGAATTGATGGAATGCCTGGGACCCCCGGGCTAAAAGTCAAGCGTAAGGCTCCCCGAGACGAT	WT	TwoExp	id_uc001vqx.3_3016_WT	id_uc001vqx.3_3016_WT	id_uc001vqx.3_3016
ATGGGGTTCGGTATGCGCAGGGAGGAAATGGAAGCACGTTCTATGCTGGTTCCACCCCAGGCATCTGTGTGCTTCGAGGATGTACACTCTCAAGGCTCCCCGAGACGAT	WT	IdentifiedTRUB1	id_uc010euo.3_499_WT	id_uc010euo.3_499_WT	id_uc010euo.3_499
ATGGGGTTCGGTATGCGCAGGGAGGAAATGGAAGCACGTTCTATGCTGGTTCCACCCCAGGCATCTGTGTGCTTCGAGGATGTACACTCTCAAGGCTCCCCGAGACGAT	WT	TwoExp	id_uc010euo.3_499_WT	id_uc010euo.3_499_WT	id_uc010euo.3_499
ATGGGGTTCGGTATGCGCAGGGAGGAAATGGAAGCACGTTCTATGCTGGTTCCACCCCAGGCATCTGTGTGCTTCGAGGATGTAGGAACCCAAGGCTCCCCGAGACGAT	WT	IdentifiedTRUB1	id_uc010euo.3_499_WT	id_uc010euo.3_499_WT	id_uc010euo.3_499
ATGGGGTTCGGTATGCGCAGGGAGGAAATGGAAGCACGTTCTATGCTGGTTCCACCCCAGGCATCTGTGTGCTTCGAGGATGTAGGAACCCAAGGCTCCCCGAGACGAT	WT	TwoExp	id_uc010euo.3_499_WT	id_uc010euo.3_499_WT	id_uc010euo.3_499
ATGGGGTTCGGTATGCGCACTCAAGGTTCATTGGGCTCTGCTCTCCTCCCTGCCATTACGGGAGCTGTGGACAGAGCTCCCTCAGAAGCGAAAGGCTCCCCGAGACGAT	WT	TwoExp	id_uc011lzh.2_4278_WT	id_uc011lzh.2_4278_WT	id_uc011lzh.2_4278
ATGGGGTTCGGTATGCGCTCTGCACCGGAGTACACGTATGGCATTTCAAATATAGATACAACCATTGAAGGAACGTCAGATGAACTAAGGAAAGGCTCCCCGAGACGAT	WT	TwoExp	id_uc002vow.3_844_WT	id_uc002vow.3_844_WT	id_uc002vow.3_844
ATGGGGTTCGGTATGCGCTCTACCCTGACTAAAGCTTGAAATGCTACATTTCCAAGGTGAAGATGTGTGGGCACATGTTATGGGAAGGATTAAGGCTCCCCGAGACGAT	WT	Dkc1	id_uc002yal.3_306_WT	id_uc002yal.3_306_WT	id_uc002yal.3_306
ATGGGGTTCGGTATGCGCTCTACCCTGACTAAAGCTTGAAATGCTACATTTCCAAGGTGAAGATGTGTGGGCACATGTTATGGGAAGGATTAAGGCTCCCCGAGACGAT	WT	Pus1	id_uc002yal.3_306_WT	id_uc002yal.3_306_WT	id_uc002yal.3_306
ATGGGGTTCGGTATGCGCTCTACCCTGACTAAAGCTTGAAATGCTACATTTCCAAGGTGAAGATGTGTGGGCACATGTTATGGGAAGGATTAAGGCTCCCCGAGACGAT	WT	TwoExp	id_uc002yal.3_306_WT	id_uc002yal.3_306_WT	id_uc002yal.3_306
ATGGGGTTCGGTATGCGCTCTACCCTGACTAAAGCTTGAAATGCTACATTTCCAAGGTGAAGATGTGTGGGCACATGTTATGGCAGCCCTTAAGGCTCCCCGAGACGAT	WT	Dkc1	id_uc002yal.3_306_WT	id_uc002yal.3_306_WT	id_uc002yal.3_306
ATGGGGTTCGGTATGCGCTCTACCCTGACTAAAGCTTGAAATGCTACATTTCCAAGGTGAAGATGTGTGGGCACATGTTATGGCAGCCCTTAAGGCTCCCCGAGACGAT	WT	Pus1	id_uc002yal.3_306_WT	id_uc002yal.3_306_WT	id_uc002yal.3_306
ATGGGGTTCGGTATGCGCTCTACCCTGACTAAAGCTTGAAATGCTACATTTCCAAGGTGAAGATGTGTGGGCACATGTTATGGCAGCCCTTAAGGCTCCCCGAGACGAT	WT	TwoExp	id_uc002yal.3_306_WT	id_uc002yal.3_306_WT	id_uc002yal.3_306
ATGGGGTTCGGTATGCGCTCTACCCTGACTAAAGCTTGAAATGCTACATTTCCAAGGTGAAGATGTGTGGGCACATGTTATGGTTGAATATAAGGCTCCCCGAGACGAT	WT	Dkc1	id_uc002yal.3_306_WT	id_uc002yal.3_306_WT	id_uc002yal.3_306
ATGGGGTTCGGTATGCGCTCTACCCTGACTAAAGCTTGAAATGCTACATTTCCAAGGTGAAGATGTGTGGGCACATGTTATGGTTGAATATAAGGCTCCCCGAGACGAT	WT	Pus1	id_uc002yal.3_306_WT	id_uc002yal.3_306_WT	id_uc002yal.3_306
ATGGGGTTCGGTATGCGCTCTACCCTGACTAAAGCTTGAAATGCTACATTTCCAAGGTGAAGATGTGTGGGCACATGTTATGGTTGAATATAAGGCTCCCCGAGACGAT	WT	TwoExp	id_uc002yal.3_306_WT	id_uc002yal.3_306_WT	id_uc002yal.3_306
ATGGGGTTCGGTATGCGCGACTAAAGCCTTGCAACATCGATCACATTACTTTGAGGGTGTTCTCAAGTGCTACCTGCATGAGAATGCCAGCAAGGCTCCCCGAGACGAT	WT	Pus1	id_uc001rsy.3_925_WT	id_uc001rsy.3_925_WT	id_uc001rsy.3_925
ATGGGGTTCGGTATGCGCGGATCAGACAGCCTGACTTCTCTGCAGGGTTTTATACCTGACCATGAACCCCCAGGATGGCGTGGCTGTAACAAAGGCTCCCCGAGACGAT	WT	TwoExp	id_uc009zyv.3_1120_WT	id_uc009zyv.3_1120_WT	id_uc009zyv.3_1120
ATGGGGTTCGGTATGCGCTGAGCACAGACTTTGGTGCCAGTTTGCTAGGTTCGAATCCTGACTCCCTCTTTGTAGCTCTGTGCAGGTACTTAAGGCTCCCCGAGACGAT	WT	PredictedTRUB1	id_uc002egg.2_4429_WT	id_uc002egg.2_4429_WT	id_uc002egg.2_4429
ATGGGGTTCGGTATGCGCGATTCAGAGGAATGATCTCTACTCAGCCAGGTTCTACTCCTTTAGCGTCATTCAAGATACTATCCGAAGGTGCAAGGCTCCCCGAGACGAT	WT	TwoExp	id_uc001hks.3_1679_WT	id_uc001hks.3_1679_WT	id_uc001hks.3_1679
ATGGGGTTCGGTATGCGCGATTCAGAGGAATGATCTCTACTCAGCCAGGTTCTACTCCTTTAGCGTCATTCAAGATACTATCCGAAGGTGCAAGGCTCCCCGAGACGAT	WT	IdentifiedTRUB1	id_uc001hks.3_1679_WT	id_uc001hks.3_1679_WT	id_uc001hks.3_1679
ATGGGGTTCGGTATGCGCGATTCAGAGGAATGATCTCTACTCAGCCAGGTTCTACTCCTTTAGCGTCATTCAAGATACTATCCTCACCCGTAAGGCTCCCCGAGACGAT	WT	TwoExp	id_uc001hks.3_1679_WT	id_uc001hks.3_1679_WT	id_uc001hks.3_1679
ATGGGGTTCGGTATGCGCGATTCAGAGGAATGATCTCTACTCAGCCAGGTTCTACTCCTTTAGCGTCATTCAAGATACTATCCTCACCCGTAAGGCTCCCCGAGACGAT	WT	IdentifiedTRUB1	id_uc001hks.3_1679_WT	id_uc001hks.3_1679_WT	id_uc001hks.3_1679
ATGGGGTTCGGTATGCGCACTGCAAAGGAACCAGATATTGTGCTCGCGGTTCCAAACCGGGCATGGGCACCGAATGCTTCTCGAGGTTGCGAAGGCTCCCCGAGACGAT	WT	PredictedTRUB1	id_uc010amk.3_275_WT	id_uc010amk.3_275_WT	id_uc010amk.3_275
ATGGGGTTCGGTATGCGCAACCTGCTGGGTGATTTGTTTGCGCTCTGTTTTATGGGGCATTCCTGCGAGATGTGTCAGCTTCTTCCCCACCAAGGCTCCCCGAGACGAT	WT	Pus1	id_uc001jie.3_3652_WT	id_uc001jie.3_3652_WT	id_uc001jie.3_3652
ATGGGGTTCGGTATGCGCTGTTCCTAGAATGCAGCTGAAGACCTGTTATGTAGAGGAAATACGAGGGGTGGTGCTAGAAGACAGCTCGGGGAAGGCTCCCCGAGACGAT	WT	TwoExp	id_uc001bfr.3_1722_WT	id_uc001bfr.3_1722_WT	id_uc001bfr.3_1722
ATGGGGTTCGGTATGCGCAGTGTATTTCAAGGGTCTGTGGAAATCACGGTTCCAACCCGAGAACACAAAGAAACGCACTTTCGAGGAAAGAAAGGCTCCCCGAGACGAT	WT	IdentifiedTRUB1	id_uc002vnu.2_834_WT	id_uc002vnu.2_834_WT	id_uc002vnu.2_834
ATGGGGTTCGGTATGCGCAGTGTATTTCAAGGGTCTGTGGAAATCACGGTTCCAACCCGAGAACACAAAGAAACGCACTTTCGAGGAAAGAAAGGCTCCCCGAGACGAT	WT	TwoExp	id_uc002vnu.2_834_WT	id_uc002vnu.2_834_WT	id_uc002vnu.2_834
ATGGGGTTCGGTATGCGCAGTGTATTTCAAGGGTCTGTGGAAATCACGGTTCCAACCCGAGAACACAAAGAAACGCACTTTCGCTGCTTAGAAGGCTCCCCGAGACGAT	WT	IdentifiedTRUB1	id_uc002vnu.2_834_WT	id_uc002vnu.2_834_WT	id_uc002vnu.2_834
ATGGGGTTCGGTATGCGCAGTGTATTTCAAGGGTCTGTGGAAATCACGGTTCCAACCCGAGAACACAAAGAAACGCACTTTCGCTGCTTAGAAGGCTCCCCGAGACGAT	WT	TwoExp	id_uc002vnu.2_834_WT	id_uc002vnu.2_834_WT	id_uc002vnu.2_834
ATGGGGTTCGGTATGCGCGCCTTGGCTTGATGGAAGTGGGCCAGTCCTGGTTGTCTGAACCCAGGCAGCTGGCAGGAGTGGGGGGTCCGTAAAGGCTCCCCGAGACGAT	WT	TwoExp	id_uc001zof.2_3153_WT	id_uc001zof.2_3153_WT	id_uc001zof.2_3153
ATGGGGTTCGGTATGCGCCCGTCCCCCCTCCCAGGACTGGTCTGTTGTCTTTTCATCTGTTCAAGAGGAGATTGAAACTGAAAATGACAGCAAGGCTCCCCGAGACGAT	WT	TwoExp	id_uc002mer.4_2889_WT	id_uc002mer.4_2889_WT	id_uc002mer.4_2889
ATGGGGTTCGGTATGCGCTGGGAGTGAAGCGGCCATCTTCTGTGAAAGTATTCTCAGGCAAAAGTGAGCGCAGCTCCTCTGGATTCTGGAAAAGGCTCCCCGAGACGAT	WT	TwoExp	id_uc010ege.1_328_WT	id_uc010ege.1_328_WT	id_uc010ege.1_328
ATGGGGTTCGGTATGCGCTAGAGAACATGGGACGTGTGAACTATGGTGCATATATCAACGATTTTAAGGGTTTGGTTTCTAACAAGACAAGAAGGCTCCCCGAGACGAT	WT	TwoExp	id_uc003cfi.1_1580_WT	id_uc003cfi.1_1580_WT	id_uc003cfi.1_1580
ATGGGGTTCGGTATGCGCCTACTTCACGGAGACGGCGGGCACCTCGCTGCTGGTGACGCAGAATGGGAGGGGCGGCCTGCGGATGGGTGTCAAGGCTCCCCGAGACGAT	WT	TwoExp	id_uc002onj.4_1963_WT	id_uc002onj.4_1963_WT	id_uc002onj.4_1963
ATGGGGTTCGGTATGCGCAAGTGAGGAGGAGGAGGAGGAAGAAAACGGGTTTGAAGACAGAAAAGATGACAGCGATGACGACGTCTTAGTAAAGGCTCCCCGAGACGAT	WT	Pus1	id_uc002exs.3_598_WT	id_uc002exs.3_598_WT	id_uc002exs.3_598
ATGGGGTTCGGTATGCGCACGAGAAGAAGGGAGCCGGAGGAGCTGGTCGCTGTCGGCTAAGCAAGATTGGAGCTACTCGTCGTCTTCTCTAAAGGCTCCCCGAGACGAT	WT	CTGsites	id_uc010vdw.1_267_WT	id_uc010vdw.1_267_WT	id_uc010vdw.1_267
ATGGGGTTCGGTATGCGCACGAGAAGAAGGGAGCCGGAGGAGCTGGTCGCTGTCGGCTAAGCAAGATTGGAGCTACTCGTCGTCAATTGAGAAGGCTCCCCGAGACGAT	WT	CTGsites	id_uc010vdw.1_267_WT	id_uc010vdw.1_267_WT	id_uc010vdw.1_267
ATGGGGTTCGGTATGCGCCTTTCTACTTTTGTTTTCCTGCAGGAGCCAGGTGAGAATTTCAAGGATTATCGACTTCATATTGCAGAGCAAAAAGGCTCCCCGAGACGAT	WT	TwoExp	id_uc022amu.1_1372_WT	id_uc022amu.1_1372_WT	id_uc022amu.1_1372
ATGGGGTTCGGTATGCGCTAGCACTTTTCTCAGAACTAGCGAGACGGGCATTGTGGATCAGGTTATGGTAACTCTCAATCAGGCGGTGCTCAAGGCTCCCCGAGACGAT	WT	TwoExp	id_uc003hcl.1_2752_WT	id_uc003hcl.1_2752_WT	id_uc003hcl.1_2752
ATGGGGTTCGGTATGCGCGAAGGAGGTGACCCCAGTGTCCAGCATCCCTGTAGAAACACACCGGGCCCTGGCCTCGTGCCACTAACGCATCAAGGCTCCCCGAGACGAT	WT	TwoExp	id_uc002nnh.4_1723_WT	id_uc002nnh.4_1723_WT	id_uc002nnh.4_1723
ATGGGGTTCGGTATGCGCCTCCCAGTTCCTCCAAGGAACCGTCATGTGGTTCAAATCCAATGAAATTCTCTAAATCTCCACCCCGCGCTGAAAGGCTCCCCGAGACGAT	WT	PredictedTRUB1	id_uc002xts.1_1514_WT	id_uc002xts.1_1514_WT	id_uc002xts.1_1514
ATGGGGTTCGGTATGCGCTTAGAGCGCAGCGGCTGACGGGCCGGATCGCCTTCGCCGCCGCCCGCCCGCAAACCTTCGTGCCCCGCTCCGAAAGGCTCCCCGAGACGAT	WT	TwoExp	id_uc002cqn.3_134_WT	id_uc002cqn.3_134_WT	id_uc002cqn.3_134
ATGGGGTTCGGTATGCGCCCTGCTGCTGGGGAAAAGGAATGCATCTTGTCTTGTTCTTGCAGCCCGGCATGCCAGTGCTTCCTAACAACGTAAGGCTCCCCGAGACGAT	WT	TwoExp	id_uc001skr.1_330_WT	id_uc001skr.1_330_WT	id_uc001skr.1_330
ATGGGGTTCGGTATGCGCGGGGAAATGAGTTGGTGGATACCTTCTGGGCTTTTGAACTTGCCCCTCCCCCATTTCCCTCTCCCGCCCTCGCAAGGCTCCCCGAGACGAT	WT	Pus1	id_uc009wot.3_3212_WT	id_uc009wot.3_3212_WT	id_uc009wot.3_3212
ATGGGGTTCGGTATGCGCTTCTAGTCAACCACCTGACTTCAGCACACCATTACAATCGGGAGACTAAACCAACAACCAGAGGAAGTCTGTCAAGGCTCCCCGAGACGAT	WT	TwoExp	id_uc001zll.3_1368_WT	id_uc001zll.3_1368_WT	id_uc001zll.3_1368
ATGGGGTTCGGTATGCGCAAAATGTCATTTCTTTACTTAGGATTTGATGTTCTAATCATTAATACACTTAAGTTTTCCAGAGACATGGGGAAAGGCTCCCCGAGACGAT	WT	PredictedTRUB1	id_uc003yov.3_1637_WT	id_uc003yov.3_1637_WT	id_uc003yov.3_1637
ATGGGGTTCGGTATGCGCTCTTTCCTTTCCGTCTGGCGGCAGCCATCAGGTAAGCCAAGATGGGTGCATACAAGTACATCCAGGCTGAAACAAGGCTCCCCGAGACGAT	WT	Dkc1	id_uc003ccn.3_373_WT	id_uc003ccn.3_373_WT	id_uc003ccn.3_373
ATGGGGTTCGGTATGCGCGGAAAGCATTCTTGCAGTTTACCACTGGTTGTTCAACTCTACCCCCAGGTGGACTGGCTAACCTGTGGGGAACAAGGCTCCCCGAGACGAT	WT	IdentifiedTRUB1	id_uc001wra.1_3273_WT	id_uc001wrc.1_8126_WT	id_uc001wrc.1_8126
ATGGGGTTCGGTATGCGCGGAAAGCATTCTTGCAGTTTACCACTGGTTGTTCAACTCTACCCCCAGGTGGACTGGCTAACCTGTGGGGAACAAGGCTCCCCGAGACGAT	WT	TwoExp	id_uc001wra.1_3273_WT	id_uc001wrc.1_8126_WT	id_uc001wrc.1_8126
ATGGGGTTCGGTATGCGCGGAAAGCATTCTTGCAGTTTACCACTGGTTGTTCAACTCTACCCCCAGGTGGACTGGCTAACCTGCATCCAACAAGGCTCCCCGAGACGAT	WT	IdentifiedTRUB1	id_uc001wra.1_3273_WT	id_uc001wra.1_3273_WT	id_uc001wra.1_3273
ATGGGGTTCGGTATGCGCGGAAAGCATTCTTGCAGTTTACCACTGGTTGTTCAACTCTACCCCCAGGTGGACTGGCTAACCTGCATCCAACAAGGCTCCCCGAGACGAT	WT	TwoExp	id_uc001wra.1_3273_WT	id_uc001wra.1_3273_WT	id_uc001wra.1_3273
ATGGGGTTCGGTATGCGCTCATGGGAGGGCAGACAAAGGACTGGTGGACATATGAATTCTGTTATGGACGCCACATCCAGCAAAGGCTACTAAGGCTCCCCGAGACGAT	WT	TwoExp	id_uc010srz.2_389_WT	id_uc010srz.2_389_WT	id_uc010srz.2_389
ATGGGGTTCGGTATGCGCAGGGGCTGGTGCAAAGGATGAGTTGCACATTGTTGAAGCAGAGGCAATGAATTACGAAGGCAGTCCAACCTGTAAGGCTCCCCGAGACGAT	WT	TwoExp	id_uc003mbi.3_425_WT	id_uc003mbi.3_425_WT	id_uc003mbi.3_425
ATGGGGTTCGGTATGCGCAGGGGCTGGTGCAAAGGATGAGTTGCACATTGTTGAAGCAGAGGCAATGAATTACGAAGGCAGTCCAACCTGTAAGGCTCCCCGAGACGAT	WT	Dkc1	id_uc003mbi.3_425_WT	id_uc003mbi.3_425_WT	id_uc003mbi.3_425
ATGGGGTTCGGTATGCGCAGGGGCTGGTGCAAAGGATGAGTTGCACATTGTTGAAGCAGAGGCAATGAATTACGAAGGCAGTCGGAATTTAAAGGCTCCCCGAGACGAT	WT	TwoExp	id_uc003mbi.3_425_WT	id_uc003mbi.3_425_WT	id_uc003mbi.3_425
ATGGGGTTCGGTATGCGCAGGGGCTGGTGCAAAGGATGAGTTGCACATTGTTGAAGCAGAGGCAATGAATTACGAAGGCAGTCGGAATTTAAAGGCTCCCCGAGACGAT	WT	Dkc1	id_uc003mbi.3_425_WT	id_uc003mbi.3_425_WT	id_uc003mbi.3_425
ATGGGGTTCGGTATGCGCAACAACTCAAATAGTAAAGCTTCCTGATGATATTTACCCTATTGATTTTCACTGGTTTCCAAAAAAATTTCTAAAGGCTCCCCGAGACGAT	WT	TwoExp	id_uc021xgq.1_598_WT	id_uc021xgq.1_598_WT	id_uc021xgq.1_598
ATGGGGTTCGGTATGCGCGGGTTCTGAGTACACAGTCAGTGTGGTTGCCTTGCACGATGATATGGAGAGCCAGCCCCTGATTGTGCGAACAAAGGCTCCCCGAGACGAT	WT	TwoExp	id_uc002vfa.3_5654_WT	id_uc002vfa.3_5654_WT	id_uc002vfa.3_5654
ATGGGGTTCGGTATGCGCGAAGCAAGATAATGAGACAGAGAAGACTTCAGTTATGGTGAACAGTTTTTCTCAAGACTTACTAACGTGCTTCAAGGCTCCCCGAGACGAT	WT	Pus1	id_uc004bkf.3_4336_WT	id_uc004bkf.3_4336_WT	id_uc004bkf.3_4336
ATGGGGTTCGGTATGCGCGGAGAAAAAGGAGTCTAATTTAGAAACAGAGTTAAAGTCTCAAACAGCAAGAATTATGGAATTAGTGTATCGAAAGGCTCCCCGAGACGAT	WT	TwoExp	id_uc003cgw.3_4986_WT	id_uc003cgw.3_4986_WT	id_uc003cgw.3_4986
ATGGGGTTCGGTATGCGCCAAATGGGGATTTGCTGCATTTGTGGTAGCTGTAGGAGCTGAATATTACCTGGAGTCCCTGAATATCCTGCAGAAGGCTCCCCGAGACGAT	WT	TwoExp	id_uc002uwx.4_569_WT	id_uc002uwx.4_569_WT	id_uc002uwx.4_569
ATGGGGTTCGGTATGCGCCTCTTGTCCAAGGAAGAACATGCAGATAACTATTCTCACATGTCGACATGTTACCGATTATAAAATGATCGAAAAGGCTCCCCGAGACGAT	WT	TwoExp	id_uc002yxi.3_627_WT	id_uc002yxi.3_627_WT	id_uc002yxi.3_627
ATGGGGTTCGGTATGCGCCTACACTGAGGACCCTGAGCTGCCGGGCCTGTTCCACCCAGTGCTGGGCACGCCCTGCCAACCACTATGATGAAAGGCTCCCCGAGACGAT	WT	PredictedTRUB1	id_uc002oow.1_688_WT	id_uc002oow.1_688_WT	id_uc002oow.1_688
ATGGGGTTCGGTATGCGCCCTTATCATCTGTTCCATCAATATGTACTTTGTAGTGGTTTATGTCCGGGACCTAGGGCATGTGGACAACCCCAAGGCTCCCCGAGACGAT	WT	TwoExp	id_uc001rxk.2_1622_WT	id_uc001rxk.2_1622_WT	id_uc001rxk.2_1622
ATGGGGTTCGGTATGCGCAATAAACCCAGAACTCTTACAGCTTCTTCCCTTACATCCGAAGGACAATCTGCCCTTGCAGGAAACTCATACAAAGGCTCCCCGAGACGAT	WT	TwoExp	id_uc001cmg.4_337_WT	id_uc001cmg.4_337_WT	id_uc001cmg.4_337
ATGGGGTTCGGTATGCGCGCTGTACAAGGTTGTGCAGGGGCACCGACAGCTTGACTCCTACAAGAATGGTTTCCTCAACTTGGAGAAATCGAAGGCTCCCCGAGACGAT	WT	TwoExp	id_uc004dhj.4_2908_WT	id_uc004dhj.4_2908_WT	id_uc004dhj.4_2908
ATGGGGTTCGGTATGCGCGCTGTACAAGGTTGTGCAGGGGCACCGACAGCTTGACTCCTACAAGAATGGTTTCCTCAACTTGGAGAAATCGAAGGCTCCCCGAGACGAT	WT	Dkc1	id_uc004dhj.4_2908_WT	id_uc004dhj.4_2908_WT	id_uc004dhj.4_2908
ATGGGGTTCGGTATGCGCGCTGTACAAGGTTGTGCAGGGGCACCGACAGCTTGACTCCTACAAGAATGGTTTCCTCAACTTGGGCGACCGGAAGGCTCCCCGAGACGAT	WT	TwoExp	id_uc004dhj.4_2908_WT	id_uc004dhj.4_2908_WT	id_uc004dhj.4_2908
ATGGGGTTCGGTATGCGCGCTGTACAAGGTTGTGCAGGGGCACCGACAGCTTGACTCCTACAAGAATGGTTTCCTCAACTTGGGCGACCGGAAGGCTCCCCGAGACGAT	WT	Dkc1	id_uc004dhj.4_2908_WT	id_uc004dhj.4_2908_WT	id_uc004dhj.4_2908
ATGGGGTTCGGTATGCGCTTCGAGAAAGGCGCTTCCACCCCAGTCTGCGTTCTACCCGACGCTTCTACCCTCATACCCACAATCAGTCTAAAAGGCTCCCCGAGACGAT	WT	PredictedTRUB1	id_uc021qtw.1_1862_WT	id_uc021qtw.1_1862_WT	id_uc021qtw.1_1862
ATGGGGTTCGGTATGCGCACAACATGAAGGCTATCATTCAGAAGCTCTGCTTCACATACAGAAGTGACAGCTTTGAGAACCCCTGTTATGTAAGGCTCCCCGAGACGAT	WT	TwoExp	id_uc011mrd.1_1588_WT	id_uc011mrd.1_1588_WT	id_uc011mrd.1_1588
ATGGGGTTCGGTATGCGCGACCCTGGGCTGCTGGAGGCCAGACTGGGCTGTAGTTAGCTTTTCATCCCTAAAGAAGGCTCCTTTGTTAAAGAAGGCTCCCCGAGACGAT	WT	TwoExp	id_uc002hxv.2_2656_WT	id_uc002hxv.2_2656_WT	id_uc002hxv.2_2656
ATGGGGTTCGGTATGCGCGGCCCACAGAGGAGGGCAAGGAAGTATGGGATTATGTGACGGTCCGCAAGGATGCCTACATGTTCTTTGCAAAAAGGCTCCCCGAGACGAT	WT	Pus1	id_uc002iuv.4_178_WT	id_uc002iuv.4_178_WT	id_uc002iuv.4_178
ATGGGGTTCGGTATGCGCGATCACAACAAACACAACCGCCACAGAAGCACTATGGCATTACTTCTCCTATCAGCTTAGCAGCCTCCTGACCAAGGCTCCCCGAGACGAT	WT	Pus1	id_uc001yfq.3_276_WT	id_uc001yfq.3_276_WT	id_uc001yfq.3_276
ATGGGGTTCGGTATGCGCTCACTGAAGTTGGATGGTCTGTTAGAAGAAAATTCATTTGATCCTTCAAAAATCACAAGGAAGAACGGTTCGCAAGGCTCCCCGAGACGAT	WT	TwoExp	id_uc001dbb.2_306_WT	id_uc001dbb.2_306_WT	id_uc001dbb.2_306
ATGGGGTTCGGTATGCGCTTAGACCTTTAGGTTCACTTGGCCCAAGAGAGTACTTTATTCCTGGTACCCGATTACCACCCCCAATACGCAAAAGGCTCCCCGAGACGAT	WT	TwoExp	id_uc001hnl.3_5567_WT	id_uc001hnl.3_5567_WT	id_uc001hnl.3_5567
ATGGGGTTCGGTATGCGCACCTCCGAGTGCTTTGTCTCCACTCAGTACCTTGGATCAGAGCTGCTGAGTTCAGGATGCCTGCGGTAGCAGGAAGGCTCCCCGAGACGAT	WT	TwoExp	id_uc003ejp.3_3047_WT	id_uc003ejp.3_3047_WT	id_uc003ejp.3_3047
ATGGGGTTCGGTATGCGCAAGAGGGGAGAGTGGCGGGCCGCTGAATAAGCTTCCAAAATGATGCCCACACCAGTTATCCTATTGTAGTGTGAAGGCTCCCCGAGACGAT	WT	TwoExp	id_uc002siz.3_138_WT	id_uc002siz.3_138_WT	id_uc002siz.3_138
ATGGGGTTCGGTATGCGCTCTGCAGGTTAAATCGGAGTGACAGTGACAGTTCAACCCTGGCTAAAAAATCACTGTTTGTGAGACTCAGACCAAGGCTCCCCGAGACGAT	WT	TwoExp	id_uc003ivk.4_2863_WT	id_uc003ivk.4_2863_WT	id_uc003ivk.4_2863
ATGGGGTTCGGTATGCGCTCTGCAGGTTAAATCGGAGTGACAGTGACAGTTCAACCCTGGCTAAAAAATCACTGTTTGTGAGACTCAGACCAAGGCTCCCCGAGACGAT	WT	IdentifiedTRUB1	id_uc003ivk.4_2863_WT	id_uc003ivk.4_2863_WT	id_uc003ivk.4_2863
ATGGGGTTCGGTATGCGCTCTGCAGGTTAAATCGGAGTGACAGTGACAGTTCAACCCTGGCTAAAAAATCACTGTTTGTGAGATGCTTATTAAGGCTCCCCGAGACGAT	WT	TwoExp	id_uc003ivk.4_2863_WT	id_uc010irx.3_3256_WT	id_uc010irx.3_3256
ATGGGGTTCGGTATGCGCTCTGCAGGTTAAATCGGAGTGACAGTGACAGTTCAACCCTGGCTAAAAAATCACTGTTTGTGAGATGCTTATTAAGGCTCCCCGAGACGAT	WT	IdentifiedTRUB1	id_uc003ivk.4_2863_WT	id_uc010irx.3_3256_WT	id_uc010irx.3_3256
ATGGGGTTCGGTATGCGCCAGCCGCGGCGGCGGCGGCGGCGGCAGCGCGCTGTAAGGCGGCCGAGGCGGCGGCCGACGAGCCGCGCGATAGAAGGCTCCCCGAGACGAT	WT	CTGsites	id_uc003ncw.3_518_WT	id_uc003ncw.3_518_WT	id_uc003ncw.3_518
ATGGGGTTCGGTATGCGCCAGCCGCGGCGGCGGCGGCGGCGGCAGCGCGCTGTAAGGCGGCCGAGGCGGCGGCCGACGAGCCGCCCAGGTGAAGGCTCCCCGAGACGAT	WT	CTGsites	id_uc003ncw.3_518_WT	id_uc003ncw.3_518_WT	id_uc003ncw.3_518
ATGGGGTTCGGTATGCGCTGAGGACTCTGCCATTCAGTGCCGGCTGCTGTTCCAGGCACCACAGACTTTGAGTCCCCCGAGGCATTGTGGAAAGGCTCCCCGAGACGAT	WT	PredictedTRUB1	id_uc011mej.2_1329_WT	id_uc011mej.2_1329_WT	id_uc011mej.2_1329
ATGGGGTTCGGTATGCGCGCTCCTTGCACAGCAGCTGCACGCGCCGTGGCTCCGGATCTCTTCGTCTTTGCAGCGTAGCCCGAGTAGTAGGAAGGCTCCCCGAGACGAT	WT	TwoExp	id_uc010uki.2_223_WT	id_uc010uki.2_223_WT	id_uc010uki.2_223
ATGGGGTTCGGTATGCGCTGATGAGCTCCCTGGGCTGAGGAGAAGGGTGTTCCAGGCCTGTGTGGAGCCGCCCTGCCCGTATGCCCACACGAAGGCTCCCCGAGACGAT	WT	PredictedTRUB1	id_uc002baa.3_494_WT	id_uc002baa.3_494_WT	id_uc002baa.3_494
ATGGGGTTCGGTATGCGCACGCTGCAGCGCACGGACCCCCCCAAGACACATATGACCCACCACCCCATCTCTGACCATGAGGCCGCTCAATAAGGCTCCCCGAGACGAT	WT	Dkc1	id_uc011dmc.2_805_WT	id_uc011dmc.2_805_WT	id_uc011dmc.2_805
ATGGGGTTCGGTATGCGCCTGTACGTACAGGTCGTCATCTTAGAACAGTGTTTGAAGATACTGTGGAGGAGCGTGTCATCAATGCAAACCCAAGGCTCCCCGAGACGAT	WT	TwoExp	id_uc004cxs.2_366_WT	id_uc004cxs.2_366_WT	id_uc004cxs.2_366
ATGGGGTTCGGTATGCGCTGGACCACAGCACTGACTTTTTTTCTGAGGCTTTTGAACATAATGGGCGTCCCTATTCTCTTTTGGGGTAGGAAAGGCTCCCCGAGACGAT	WT	TwoExp	id_uc021xav.1_2303_WT	id_uc021xav.1_2303_WT	id_uc021xav.1_2303
ATGGGGTTCGGTATGCGCCTCGCAGAATTACCGCCTCTTCTTTAAGAATGTAACTGGTCACTACATTTCCCCCTTTCATGATAAACTTACGAAGGCTCCCCGAGACGAT	WT	TwoExp	id_uc003hxl.3_185_WT	id_uc003hxl.3_185_WT	id_uc003hxl.3_185
ATGGGGTTCGGTATGCGCTACAGGGATCAAGTGACCTGGGAAGAACCGAGTTTAACACCAGGATGTGTTTCCTTAGATTTCCTTGTGAAGAAAGGCTCCCCGAGACGAT	WT	TwoExp	id_uc001txm.2_2147_WT	id_uc001txm.2_2147_WT	id_uc001txm.2_2147
ATGGGGTTCGGTATGCGCCTCTGCACCTGCTGTCTTAGGGAAGAAATGGTTCAAATCCATGTGGTGACATTGCATTAGTCTCCCTCAGGGTAAGGCTCCCCGAGACGAT	WT	TwoExp	id_uc004euq.3_4968_WT	id_uc004euq.3_4968_WT	id_uc004euq.3_4968
ATGGGGTTCGGTATGCGCGAAACATTTTATTATGTGACTCACTAAGATGTTCAATTCATTAGTATTTTCTGGTTACTCAAAGTGCATTTTGAAGGCTCCCCGAGACGAT	WT	PredictedTRUB1	id_uc003ukm.2_4185_WT	id_uc003ukm.2_4185_WT	id_uc003ukm.2_4185
ATGGGGTTCGGTATGCGCTGCCCTAGGAAAAAGGCTGCATCTTTATATGTTACATTCATATAAACTTTGTAACTTTTTGGACATGCGTATTAAGGCTCCCCGAGACGAT	WT	TwoExp	id_uc002ggo.2_1925_WT	id_uc002ggo.2_1925_WT	id_uc002ggo.2_1925
ATGGGGTTCGGTATGCGCCCCTTCGACATAGTGACATTGTTAAACCTTGTTCTATTCAAGGCCTCTGACACCAACAGAGAGATTGTCTTGAAAGGCTCCCCGAGACGAT	WT	PredictedTRUB1	id_uc001utx.3_4283_WT	id_uc001utx.3_4283_WT	id_uc001utx.3_4283
ATGGGGTTCGGTATGCGCCTTGCAGCTTGCAATCCGTGGTGATGAAGAGTTGGATTCTCTTATCAAGGCTACCATAGCTGGGGTTGCCAATAAGGCTCCCCGAGACGAT	WT	TwoExp	id_uc003tma.2_446_WT	id_uc003tma.2_446_WT	id_uc003tma.2_446
ATGGGGTTCGGTATGCGCGGCCCAACCCTGGGCTGCGGCTGCCTGGGCGCTATGAGGTCCGGGCAGAGGTGGGCAATGGCGTGTTCAAACAAAGGCTCCCCGAGACGAT	WT	Pus1	id_uc010bvw.2_1318_WT	id_uc010bvw.2_1318_WT	id_uc010bvw.2_1318
ATGGGGTTCGGTATGCGCCTCCTTTCTCCTCTACCCTCCTCTCAGGTACCTGTGTGACAAGGTCGTCCCTGGGAACAGGGTTATTCACAAGAAGGCTCCCCGAGACGAT	WT	CTGsites	id_uc003anw.1_342_WT	id_uc003anw.1_342_WT	id_uc003anw.1_342
ATGGGGTTCGGTATGCGCCTCCTTTCTCCTCTACCCTCCTCTCAGGTACCTGTGTGACAAGGTCGTCCCTGGGAACAGGGTTAGCGTTAGGAAGGCTCCCCGAGACGAT	WT	CTGsites	id_uc003anw.1_342_WT	id_uc003anw.1_342_WT	id_uc003anw.1_342
ATGGGGTTCGGTATGCGCTCGTCGTGAAGACACAGCGCATCTCCCCGCTGTAGGCTTCCTCCCACAGAACCCGTTTCGGGCCTCTGGGAAAAAGGCTCCCCGAGACGAT	WT	TwoExp	id_uc002mrt.3_289_WT	id_uc002mrt.3_289_WT	id_uc002mrt.3_289
ATGGGGTTCGGTATGCGCTGAGTGTCATCCTAAGCCGACCCAGAGAACCTTTCCTGGCTGTACAATTCGTAACACACCTTCAGGGGGAGAAAAGGCTCCCCGAGACGAT	WT	TwoExp	id_uc002nvk.3_580_WT	id_uc002nvk.3_580_WT	id_uc002nvk.3_580
ATGGGGTTCGGTATGCGCGGTGTTGCTGGAAAAGGCTACTAGGAAAAGAGTACGTGATGCCCTTACAGCTGAAAAATCCAAGATGCGTATAAAGGCTCCCCGAGACGAT	WT	TwoExp	id_uc001gki.1_315_WT	id_uc001gki.1_315_WT	id_uc001gki.1_315
ATGGGGTTCGGTATGCGCGACCTCAAAGCTAGCAACAGGCAGCGCTGGGTTCTAGTCCCAGATCCACTACTGACAAGCTGAATTCCCGTCCAAGGCTCCCCGAGACGAT	WT	PredictedTRUB1	id_uc002fuo.2_2592_WT	id_uc002fuo.2_2592_WT	id_uc002fuo.2_2592
ATGGGGTTCGGTATGCGCAAATTGGAGGCCATTTTTCAGTCAATTTCCCTTTCCCAATAAAAGCCTTTAGTTGTGTACTGGGGTCAAGAAAAAGGCTCCCCGAGACGAT	WT	TwoExp	id_uc002dxs.3_1315_WT	id_uc002dxs.3_1315_WT	id_uc002dxs.3_1315
ATGGGGTTCGGTATGCGCTGTCTCGGTGTAAAGCCCGATCGTACATTTGTTCAACTCTGAGCTCGGAGAAAAGCTGCCCTGTGTTATGACTAAGGCTCCCCGAGACGAT	WT	PredictedTRUB1	id_uc022arb.1_2503_WT	id_uc022arb.1_2503_WT	id_uc022arb.1_2503
ATGGGGTTCGGTATGCGCTGCAGTCTCAAGCTGGTGGAAACAATACTGGTTCAACTCCACTAAGAAAAGCCCAATCTTCAGCTTTTGTATCAAGGCTCCCCGAGACGAT	WT	PredictedTRUB1	id_uc002lmv.1_1227_WT	id_uc002lmv.1_1227_WT	id_uc002lmv.1_1227
ATGGGGTTCGGTATGCGCCTGTTTGTGGGGCCCAGGCTTTGATGAGTGGTTCAAACCCCATGCTGGGCTGTAACACTGGTGCCCCAGCGTTAAGGCTCCCCGAGACGAT	WT	PredictedTRUB1	id_uc001uwk.3_2173_WT	id_uc001uwk.3_2173_WT	id_uc001uwk.3_2173
ATGGGGTTCGGTATGCGCGTGGACGGCCTGAGGTGGTGCTGGAGGGCAGTTACGACGGCCACCACTGGACGGAGATCGAGTTCTGCTCGCAAAGGCTCCCCGAGACGAT	WT	TwoExp	id_uc003blp.2_1449_WT	id_uc003blp.2_1449_WT	id_uc003blp.2_1449
ATGGGGTTCGGTATGCGCATGAGAAGGACCCACGGCGTCTGTTCGAAGGGTCCGCAAGCAGGTGGTGAACATCCCGTCCTTCACGTAAGCAAAGGCTCCCCGAGACGAT	WT	TwoExp	id_uc002qdy.3_280_WT	id_uc002qdy.3_280_WT	id_uc002qdy.3_280
ATGGGGTTCGGTATGCGCGCATTTATGTTTGTGTATGCTTAAAATTTAAGTTCCCAGTGGGCCGTATTCATCGACACCTAAAACTGTAGCGAAGGCTCCCCGAGACGAT	WT	TwoExp	id_uc003hvn.1_544_WT	id_uc003hvn.1_544_WT	id_uc003hvn.1_544
ATGGGGTTCGGTATGCGCCTCCTGCTCACACTGTCACCATGGCTTGTATCTCTGCCAACCAAGCCATGACCACAGGTGTTGGCTGCTACCCAAGGCTCCCCGAGACGAT	WT	Pus1	id_uc002rgz.3_670_WT	id_uc002rgz.3_670_WT	id_uc002rgz.3_670
ATGGGGTTCGGTATGCGCCCGAGTCCCAGGCTTACATGGACCTCTTGGCATTTGAGAGGAAACTGGATCAAACCATCATGCGGAAAGTCGCAAGGCTCCCCGAGACGAT	WT	Pus1	id_uc003wjs.3_484_WT	id_uc003wjs.3_484_WT	id_uc003wjs.3_484
ATGGGGTTCGGTATGCGCAAGGAATACTTTCAAGTCATCCCAAATATGGTTCCATCCCTAAACTTATACTTGCTTGTATCATGTAGACGGGAAGGCTCCCCGAGACGAT	WT	IdentifiedTRUB1	id_uc003gyp.3_436_WT	id_uc003gyp.3_436_WT	id_uc003gyp.3_436
ATGGGGTTCGGTATGCGCAAGGAATACTTTCAAGTCATCCCAAATATGGTTCCATCCCTAAACTTATACTTGCTTGTATCATGTAGACGGGAAGGCTCCCCGAGACGAT	WT	TwoExp	id_uc003gyp.3_436_WT	id_uc003gyp.3_436_WT	id_uc003gyp.3_436
ATGGGGTTCGGTATGCGCAAGGAATACTTTCAAGTCATCCCAAATATGGTTCCATCCCTAAACTTATACTTGCTTGTATCATGTGCTGGTAAAGGCTCCCCGAGACGAT	WT	IdentifiedTRUB1	id_uc003gyp.3_436_WT	id_uc010igk.3_455_WT	id_uc010igk.3_455
ATGGGGTTCGGTATGCGCAAGGAATACTTTCAAGTCATCCCAAATATGGTTCCATCCCTAAACTTATACTTGCTTGTATCATGTGCTGGTAAAGGCTCCCCGAGACGAT	WT	TwoExp	id_uc003gyp.3_436_WT	id_uc010igk.3_455_WT	id_uc010igk.3_455
ATGGGGTTCGGTATGCGCCACCCTCCTTTCTGCCCCAGAGGAAGGAGCTGTAGTGTCCTGCTGCCTCTGGGCGCCCGCCTCTAACTCGTCTAAGGCTCCCCGAGACGAT	WT	TwoExp	id_uc003anu.4_2452_WT	id_uc003anu.4_2452_WT	id_uc003anu.4_2452
ATGGGGTTCGGTATGCGCCTCAGACTGTTTGCAACTTTACAGATGGTGCATTGGTTCAGCATCAGGAGTGGGATGGGAAGGAAGGCAGGGGAAGGCTCCCCGAGACGAT	WT	TwoExp	id_uc003wlb.3_663_WT	id_uc003wlb.3_663_WT	id_uc003wlb.3_663
ATGGGGTTCGGTATGCGCCTACCCCTGCTCACTCTGTTCTAAGCAGCTGTTCAATGCGGCTGCCCTCAAAAACCATGTGCGGGAGGCTATCAAGGCTCCCCGAGACGAT	WT	PredictedTRUB1	id_uc002eap.3_1522_WT	id_uc002eap.3_1522_WT	id_uc002eap.3_1522
ATGGGGTTCGGTATGCGCGCCTCTTCGAGCGCCGCGGACGCGTCATCGAGTGTGACGTGGTGAAAGACTACGCGTTTGTTCACTAAGCCTCAAGGCTCCCCGAGACGAT	WT	Dkc1	id_uc001oit.3_462_WT	id_uc001oit.3_462_WT	id_uc001oit.3_462
ATGGGGTTCGGTATGCGCTTTTCCTCTCATATTTTGGGTGTATCAAAAGTTCTAGACTTTTGAAGTTATGATTTCAGTGGCCCTATGCTCCAAGGCTCCCCGAGACGAT	WT	PredictedTRUB1	id_uc001rau.4_3854_WT	id_uc001rau.4_3854_WT	id_uc001rau.4_3854
ATGGGGTTCGGTATGCGCCCAAGGCTGATGCGCCTTTTCTATTTCCAGCCTGAGTCCAGCTACTCCCTCCTCGCTGAAAATTCCAATGCGAAAGGCTCCCCGAGACGAT	WT	CTGsites	id_uc010dsv.3_178_WT	id_uc010dsv.3_178_WT	id_uc010dsv.3_178
ATGGGGTTCGGTATGCGCCCAAGGCTGATGCGCCTTTTCTATTTCCAGCCTGAGTCCAGCTACTCCCTCCTCGCTGAAAATTCAAGAATAAAAGGCTCCCCGAGACGAT	WT	CTGsites	id_uc010dsv.3_178_WT	id_uc010dsv.3_178_WT	id_uc010dsv.3_178
ATGGGGTTCGGTATGCGCTGCCTGCCGTGCAGAGCTTTTCCTGCTTACCCTACGGGCGTCTGGCCTACCACCTGGCTGTGGTGGCTATCTCAAGGCTCCCCGAGACGAT	WT	TwoExp	id_uc003zcd.2_1192_WT	id_uc003zcd.2_1192_WT	id_uc003zcd.2_1192
ATGGGGTTCGGTATGCGCATCCTGGAGCGAATCCTACCTTCCAAACAGGTTACACTCCTGGCACACCTTACAAAGTGTCCTGTATTTCTCGAAGGCTCCCCGAGACGAT	WT	TwoExp	id_uc002tsd.3_387_WT	id_uc002tsd.3_387_WT	id_uc002tsd.3_387
ATGGGGTTCGGTATGCGCCGCCAGGCCGAACCGCAGCTTCTTGGCTTAGGTACTTCTACTCACAGCGGCCGATTCCGAGGCCACATGCAATAAGGCTCCCCGAGACGAT	WT	TwoExp	id_uc001ehz.3_187_WT	id_uc001ehz.3_187_WT	id_uc001ehz.3_187
ATGGGGTTCGGTATGCGCCTTTATCCTCAAGCATACGGGACCAGGTCTACTATCCATGGCCAACTCTGGCCCAAACACCAATGGACTTCCAAAGGCTCCCCGAGACGAT	WT	TwoExp	id_uc001cdw.3_758_WT	id_uc001cdw.3_758_WT	id_uc001cdw.3_758
ATGGGGTTCGGTATGCGCCACCACGGTGACAGTGCTGCAGGGAGAGATCTTTGAGGGAGCGCCTGTGCAGACGGTGTGTCCCCATGGGCTGAAGGCTCCCCGAGACGAT	WT	Pus1	id_uc002cww.3_617_WT	id_uc002cww.3_617_WT	id_uc002cww.3_617
ATGGGGTTCGGTATGCGCGCTTCTCTCTCTTCCTGCAGGGATGCCATTATTACTTGCAATCCTGAGGAATTCATAGTTGAGGCCCTGTAGTAAGGCTCCCCGAGACGAT	WT	TwoExp	id_uc002gnu.4_637_WT	id_uc002gnu.4_637_WT	id_uc002gnu.4_637
ATGGGGTTCGGTATGCGCAGGTCAGTGCTATAGAAATTCAGTATCTGGCATCGTTGGTTTTCTTGGCTTTGTGCTTGTTAAACTCACTCGTAAGGCTCCCCGAGACGAT	WT	TwoExp	id_uc001pec.3_3434_WT	id_uc001pec.3_3434_WT	id_uc001pec.3_3434
ATGGGGTTCGGTATGCGCGCTTTTGCCCTACTCAGCCCAACCTAGACCTGTAGATTTCCCTCTCCTGCTTAGGAGTATGGAGTTGAGCACGAAGGCTCCCCGAGACGAT	WT	TwoExp	id_uc001bpr.3_869_WT	id_uc001bpr.3_869_WT	id_uc001bpr.3_869
ATGGGGTTCGGTATGCGCGTGAAGTTCAGGAGTATGTGGATATCTGTGACTATGCTGTTGGTTTATCAAGGATGATTGGAGGAAGGATAGGAAGGCTCCCCGAGACGAT	WT	TwoExp	id_uc003ktx.3_659_WT	id_uc003ktx.3_659_WT	id_uc003ktx.3_659
ATGGGGTTCGGTATGCGCGTTTTAATAACATTCTTTTTTCTTTAAGGGGTTTGTTAAAGTTGTTAAGAATAAGGCCTACTTTATCGGTGAGAAGGCTCCCCGAGACGAT	WT	TwoExp	id_uc001dpb.3_1035_WT	id_uc001dpb.3_1035_WT	id_uc001dpb.3_1035
ATGGGGTTCGGTATGCGCACACAGAGCAGATGACACCTCCTTCTGTTTTGTAGTGTATCCTGGTGTCATTTTCTGTGAATGTGAAACTACCAAGGCTCCCCGAGACGAT	WT	Pus1	id_uc003eqx.1_3938_WT	id_uc003eqx.1_3938_WT	id_uc003eqx.1_3938
ATGGGGTTCGGTATGCGCTGCTTGGAACTACTTTGCAGTGATTACTTGGTTGCAGTCCAAGTACTCTCGTTTAGTCTGAGCCTTTAACTCTAAGGCTCCCCGAGACGAT	WT	TwoExp	id_uc001qvf.3_1622_WT	id_uc001qvf.3_1622_WT	id_uc001qvf.3_1622
ATGGGGTTCGGTATGCGCTGTTCTCGCGAGAGGCGGGAAAGGGCGCAGGGTTTGAAACATGGCGGACGACGTAGACCAGCAACACTCAAGTAAGGCTCCCCGAGACGAT	WT	TwoExp	id_uc003byn.3_127_WT	id_uc003byn.3_127_WT	id_uc003byn.3_127
ATGGGGTTCGGTATGCGCATATGTCAGAGTCTGAATAAGACTCAGCTTGTTCTAGTCATGCTGAGTTTCTCATATATTTTTTAGTTTTGCAAAGGCTCCCCGAGACGAT	WT	PredictedTRUB1	id_uc003iyt.4_2515_WT	id_uc003iyt.4_2515_WT	id_uc003iyt.4_2515
ATGGGGTTCGGTATGCGCCTGGAGCTGGCTACAAATGGGTAAAGACCTACTTTTTATACGACTTCGATATTTGACTGGTGCCTCTGTCTATAAGGCTCCCCGAGACGAT	WT	TwoExp	id_uc001uvy.3_979_WT	id_uc001uvy.3_979_WT	id_uc001uvy.3_979
ATGGGGTTCGGTATGCGCTGAATTAACTTAGAAATTCATTTCCTCACCTGTAGTGGCCACCTCTATATTGAGGTGCTCAATAATCACTTCGAAGGCTCCCCGAGACGAT	WT	TwoExp	id_uc002xoh.2_2041_WT	id_uc002xoh.2_2041_WT	id_uc002xoh.2_2041
ATGGGGTTCGGTATGCGCACCGCACTTAAAATCTATGAGTTTTTACTTTTTACTGGGAATGGAAAGTGTGGTGAAGATCATTCAGATATAAAAGGCTCCCCGAGACGAT	WT	TwoExp	id_uc001geo.3_2310_WT	id_uc001geo.3_2310_WT	id_uc001geo.3_2310
ATGGGGTTCGGTATGCGCCTGGCTTACTGCCTCATCTTGTTCCCTGAGGTTCTAGACCTCTAGGGTGTTGTCCGGAAAGAACAACTGGTTTAAGGCTCCCCGAGACGAT	WT	PredictedTRUB1	id_uc021udg.1_877_WT	id_uc021udg.1_877_WT	id_uc021udg.1_877
ATGGGGTTCGGTATGCGCAGCTCCGAGAGTAAGGACACCTCCTTGGAGACTAGACGCCAGTTAGCCTTGAAGGCATTCACTCAACAAGGGTAAGGCTCCCCGAGACGAT	WT	TwoExp	id_uc002vex.4_698_WT	id_uc002vex.4_698_WT	id_uc002vex.4_698
ATGGGGTTCGGTATGCGCAAGAAGCTGGTGAACTCGGTGGCTGGCTGTGCTGATGACGCTCTTGCTGGCCTGGTGGCCTGCAAAGAACCTTAAGGCTCCCCGAGACGAT	WT	TwoExp	id_uc001nre.3_300_WT	id_uc001nre.3_300_WT	id_uc001nre.3_300
ATGGGGTTCGGTATGCGCGAAGCCTGTGCTGCGGCATCCCCTGGCTTGGATTCTGCTGCTGAGCCTCATCGTCTGTGTGAGCAACCTTAGTAAGGCTCCCCGAGACGAT	WT	TwoExp	id_uc001yuz.3_1034_WT	id_uc001yuz.3_1034_WT	id_uc001yuz.3_1034
ATGGGGTTCGGTATGCGCGGACATGAGCAATCAGGACGTGATCAATGCCATTGAACAGGACTACCGGCTGCCCCCGCCCCCAGGGTAACGCAAGGCTCCCCGAGACGAT	WT	Dkc1	id_uc003uwm.1_3700_WT	id_uc003uwm.1_3700_WT	id_uc003uwm.1_3700
ATGGGGTTCGGTATGCGCCAGAAGGCACATTTAATTTTATTCAAGGGTGATTTGAATTACAGGAAGTTGACAGGTGACAGAAAATTAACATAAGGCTCCCCGAGACGAT	WT	Pus1	id_uc003qok.1_1361_WT	id_uc003qok.1_1361_WT	id_uc003qok.1_1361
ATGGGGTTCGGTATGCGCTTCAAAGGGAGCGCACTTCCGCTGCCCTTTCTTTCGCCAGCCTTACGGGCCCGAACCCTCGTGTGCTATTCGAAAGGCTCCCCGAGACGAT	WT	TwoExp	id_uc021quf.1_93_WT	id_uc021quf.1_93_WT	id_uc021quf.1_93
ATGGGGTTCGGTATGCGCGAAGAAAGGAAACGGGGAAAATCAAAAGGGGTTCAAACCCCACCTCAGTAGGTGGAGGGGAGCGCCGCCAGGTAAGGCTCCCCGAGACGAT	WT	TwoExp	id_uc003smp.3_3910_WT	id_uc003smp.3_3910_WT	id_uc003smp.3_3910
ATGGGGTTCGGTATGCGCGGCCTCAGCTGCCAGCTACTCGAGCACGCAGTTCGACTCTGCCGGCGGGGTGGCCTACCTGGATGGGGCAGGAAAGGCTCCCCGAGACGAT	WT	IdentifiedTRUB1	id_uc003ejl.2_1305_WT	id_uc003ejn.2_1347_WT	id_uc003ejn.2_1347
ATGGGGTTCGGTATGCGCGGCCTCAGCTGCCAGCTACTCGAGCACGCAGTTCGACTCTGCCGGCGGGGTGGCCTACCTGGATGGGGCAGGAAAGGCTCCCCGAGACGAT	WT	TwoExp	id_uc003ejl.2_1305_WT	id_uc003ejn.2_1347_WT	id_uc003ejn.2_1347
ATGGGGTTCGGTATGCGCGGCCTCAGCTGCCAGCTACTCGAGCACGCAGTTCGACTCTGCCGGCGGGGTGGCCTACCTGGATGCAGGCTATAAGGCTCCCCGAGACGAT	WT	IdentifiedTRUB1	id_uc003ejl.2_1305_WT	id_uc003ejl.2_1305_WT	id_uc003ejl.2_1305
ATGGGGTTCGGTATGCGCGGCCTCAGCTGCCAGCTACTCGAGCACGCAGTTCGACTCTGCCGGCGGGGTGGCCTACCTGGATGCAGGCTATAAGGCTCCCCGAGACGAT	WT	TwoExp	id_uc003ejl.2_1305_WT	id_uc003ejl.2_1305_WT	id_uc003ejl.2_1305
ATGGGGTTCGGTATGCGCTGTTGGGATGTGCGTAAACGAGAGACGTTTCGTGAAGATTCCCCCAAAGCTTGCCTACGGAAATGGCTGCGCTAAGGCTCCCCGAGACGAT	WT	TwoExp	id_uc003tdh.3_508_WT	id_uc003tdh.3_508_WT	id_uc003tdh.3_508
ATGGGGTTCGGTATGCGCGCAGCTTGAGTTCACCAAGCTCAACATTTACTTCAAGTCCCGCGGCGGCTCCTACCATCGGCTGCTTCGACGAAAGGCTCCCCGAGACGAT	WT	Pus1	id_uc002nkj.3_747_WT	id_uc002nkj.3_747_WT	id_uc002nkj.3_747
ATGGGGTTCGGTATGCGCTCCAGGATGCCCTGGGCATCGCCTTCTGCCTCTACATGCTGAAGACCATCCGTCTGCCCACCTTCTCGCAGTAAAGGCTCCCCGAGACGAT	WT	TwoExp	id_uc002lvs.3_1081_WT	id_uc002lvs.3_1081_WT	id_uc002lvs.3_1081
ATGGGGTTCGGTATGCGCATTTCCATGTCTTCTTGGAATATAATCAAGATTTGAGTGTGCGAGGAAAAAATAAAAAAGAGAAACCGTCAGAAAGGCTCCCCGAGACGAT	WT	Pus1	id_uc001wsf.1_562_WT	id_uc001wsf.1_562_WT	id_uc001wsf.1_562
ATGGGGTTCGGTATGCGCACCTAACTGTCCAGGAGGTGGACCCCCAAAAGTACAAGGGCATATTTAACGGATTCTCAGTTACAAACACTGGAAGGCTCCCCGAGACGAT	WT	TwoExp	id_uc001tfq.3_519_WT	id_uc001tfq.3_519_WT	id_uc001tfq.3_519
ATGGGGTTCGGTATGCGCCTGACAACAAAGGCTGGAGAAGGGCCCTGAGTTCCAGCCTCTCCCCAAGGGTCCCCGCCCCAGTGCTTGTTCAAAGGCTCCCCGAGACGAT	WT	PredictedTRUB1	id_uc001tzc.3_3265_WT	id_uc001tzc.3_3265_WT	id_uc001tzc.3_3265
ATGGGGTTCGGTATGCGCAGCAGCCACCGCCGCAATCATGGTGTCAGTAATTAACACTGTGGATACCTCCCATGAGGACATGAGGAGCTATAAGGCTCCCCGAGACGAT	WT	TwoExp	id_uc003bvn.3_137_WT	id_uc003bvn.3_137_WT	id_uc003bvn.3_137
ATGGGGTTCGGTATGCGCAAGGCAGGTTAGTGAGAGCATGTCTGCCCTGTTCCAGGCAGTGCGCCTGGAGAGCGCCTGGGCGGGGGCGGCGAAGGCTCCCCGAGACGAT	WT	PredictedTRUB1	id_uc001tno.1_214_WT	id_uc001tno.1_214_WT	id_uc001tno.1_214
ATGGGGTTCGGTATGCGCCAACGTGCTCATCTTCTTCTGGTGCTTGGCTTTTTTGTGGGGGCTCCTAATTCTCCTAAAATATCGCGGTTGGAAGGCTCCCCGAGACGAT	WT	TwoExp	id_uc011drm.2_1180_WT	id_uc011drm.2_1180_WT	id_uc011drm.2_1180
ATGGGGTTCGGTATGCGCGTGGGGCTTCACCAAGTTCAATGCTGATGAATTTGAAGACATGGTGGCTGAAAAGCGGCTCATCCTAGGCTTTAAGGCTCCCCGAGACGAT	WT	TwoExp	id_uc004fko.2_568_WT	id_uc004fko.2_568_WT	id_uc004fko.2_568
ATGGGGTTCGGTATGCGCAGATATCTACCTCGGAGGGAGTTTCTGCTACTTTAGGGAATTATTGACTGGGCTTTGGGGTTGAATAACAAACAAGGCTCCCCGAGACGAT	WT	Pus1	id_uc003oav.1_2203_WT	id_uc003oav.1_2203_WT	id_uc003oav.1_2203
ATGGGGTTCGGTATGCGCCTCTAAGGAGAATGGCCCAGTCCTCTCCGGAGTCCACACAGGGGAGGTGATAGCATTGCTTTCGTGGCGTTATAAGGCTCCCCGAGACGAT	WT	TwoExp	id_uc010jai.3_1139_WT	id_uc010jai.3_1139_WT	id_uc010jai.3_1139
ATGGGGTTCGGTATGCGCTTTTCAAATTATTTCCATGACGGGTTGATGGGTTAATTAAAGGAGAAGATTCCTAAAATTTGAGAGATTCTCGAAGGCTCCCCGAGACGAT	WT	TwoExp	id_uc003rtl.4_1057_WT	id_uc003rtl.4_1057_WT	id_uc003rtl.4_1057
ATGGGGTTCGGTATGCGCCCTGCGAGCCCCGCACCACCCCGCGGAGCACGTACCCAGGGACCGCAGCCCTGACGTGTCTCGCCTAAACGTCAAGGCTCCCCGAGACGAT	WT	TwoExp	id_uc002luz.3_3725_WT	id_uc002luz.3_3725_WT	id_uc002luz.3_3725
ATGGGGTTCGGTATGCGCGGCAGCCAGTGACACTGCAGAGTTCAGCATGTTCTAACCATGCACGCAGGGCAGGGGCTGCCTTGGTACGAACAAGGCTCCCCGAGACGAT	WT	TwoExp	id_uc001pfb.3_6611_WT	id_uc001pfb.3_6611_WT	id_uc001pfb.3_6611
ATGGGGTTCGGTATGCGCGGCAGCCAGTGACACTGCAGAGTTCAGCATGTTCTAACCATGCACGCAGGGCAGGGGCTGCCTTGGTACGAACAAGGCTCCCCGAGACGAT	WT	IdentifiedTRUB1	id_uc001pfb.3_6611_WT	id_uc001pfb.3_6611_WT	id_uc001pfb.3_6611
ATGGGGTTCGGTATGCGCGGCAGCCAGTGACACTGCAGAGTTCAGCATGTTCTAACCATGCACGCAGGGCAGGGGCTGCCTTGTACGAGGTAAGGCTCCCCGAGACGAT	WT	TwoExp	id_uc001pfb.3_6611_WT	id_uc001pfb.3_6611_WT	id_uc001pfb.3_6611
ATGGGGTTCGGTATGCGCGGCAGCCAGTGACACTGCAGAGTTCAGCATGTTCTAACCATGCACGCAGGGCAGGGGCTGCCTTGTACGAGGTAAGGCTCCCCGAGACGAT	WT	IdentifiedTRUB1	id_uc001pfb.3_6611_WT	id_uc001pfb.3_6611_WT	id_uc001pfb.3_6611
ATGGGGTTCGGTATGCGCATCTTCAGTCAGATAAAATTTATGGGAGCTGGTGTCTTATGCCTGACTCTTAGTAATTTCATACCGCAGCGGAAAGGCTCCCCGAGACGAT	WT	TwoExp	id_uc002sgn.4_2173_WT	id_uc002sgn.4_2173_WT	id_uc002sgn.4_2173
ATGGGGTTCGGTATGCGCCAGAAGGTGAATCCAAGTCGACTTCCTGTAGTTATTGGAGGATTACTTGATGTTGACTGTTCTGAACCTTACCAAGGCTCCCCGAGACGAT	WT	TwoExp	id_uc002ixq.1_2889_WT	id_uc002ixq.1_2889_WT	id_uc002ixq.1_2889
ATGGGGTTCGGTATGCGCACAAAGGTTACCGCCAAGGCCCGTCAGCTGTGTAGTGGCAAAGCCGAGACCGAGTCTCCTAAGTCAGAAGTTGAAGGCTCCCCGAGACGAT	WT	TwoExp	id_uc002hjq.3_4052_WT	id_uc002hjq.3_4052_WT	id_uc002hjq.3_4052
ATGGGGTTCGGTATGCGCGTGCCCACATCCCAGGCTTCACCCTGAATGGTTCCATGCCTGAGGGTGGAGACTAAGCCCTGTCGTCGGATTTAAGGCTCCCCGAGACGAT	WT	TwoExp	id_uc001cik.2_2319_WT	id_uc001cik.2_2319_WT	id_uc001cik.2_2319
ATGGGGTTCGGTATGCGCGTGCCCACATCCCAGGCTTCACCCTGAATGGTTCCATGCCTGAGGGTGGAGACTAAGCCCTGTCGTCGGATTTAAGGCTCCCCGAGACGAT	WT	IdentifiedTRUB1	id_uc001cik.2_2319_WT	id_uc001cik.2_2319_WT	id_uc001cik.2_2319
ATGGGGTTCGGTATGCGCGTGCCCACATCCCAGGCTTCACCCTGAATGGTTCCATGCCTGAGGGTGGAGACTAAGCCCTGTCGAATTCCTCAAGGCTCCCCGAGACGAT	WT	TwoExp	id_uc001cik.2_2319_WT	id_uc001cik.2_2319_WT	id_uc001cik.2_2319
ATGGGGTTCGGTATGCGCGTGCCCACATCCCAGGCTTCACCCTGAATGGTTCCATGCCTGAGGGTGGAGACTAAGCCCTGTCGAATTCCTCAAGGCTCCCCGAGACGAT	WT	IdentifiedTRUB1	id_uc001cik.2_2319_WT	id_uc001cik.2_2319_WT	id_uc001cik.2_2319
ATGGGGTTCGGTATGCGCATAAAGCAGCAGGCCTGTCCTGGCCGGTTGGCTTGACTCTCTCCTGTCAGAATGCAACCTGGCTTATTCCTCCAAGGCTCCCCGAGACGAT	WT	Pus1	id_uc002iqu.2_1986_WT	id_uc002iqu.2_1986_WT	id_uc002iqu.2_1986
ATGGGGTTCGGTATGCGCCATGCAGCTGTGCAGAGGAAATTACCTGATGTTCCAAACCCCCTCCAGATCCTGTATATCCGCAGCGAAAAATAAGGCTCCCCGAGACGAT	WT	PredictedTRUB1	id_uc001fge.2_1239_WT	id_uc001fge.2_1239_WT	id_uc001fge.2_1239
ATGGGGTTCGGTATGCGCCACAGAAAACAAAGAATCCAACCCTTTCATCTTACAGGTGAACAAACTGTGATGATGCACATGTAATAATAGCAAGGCTCCCCGAGACGAT	WT	Pus1	id_uc001kew.3_3051_WT	id_uc001kew.3_3051_WT	id_uc001kew.3_3051
ATGGGGTTCGGTATGCGCGCCTCCAAAACTGCAGTTGCCATTGAGAAGGTTAAACTCCGAGTCTTAAAGCAATATGATTATGAAAACTTTCAAGGCTCCCCGAGACGAT	WT	TwoExp	id_uc001gra.3_1623_WT	id_uc001gra.3_1623_WT	id_uc001gra.3_1623
ATGGGGTTCGGTATGCGCCAGCTGGCCCCCTGCTGGCAGGCTGAACACCCTGCGGAGCGGGTGAGATCGGCTTTCGCTGCACCCGGCGCTTAAGGCTCCCCGAGACGAT	WT	TwoExp	id_uc002hky.2_1645_WT	id_uc002hlk.2_1645_WT	id_uc002hlk.2_1645
ATGGGGTTCGGTATGCGCCAGCTGGCCCCCTGCTGGCAGGCTGAACACCCTGCGGAGCGGGTGAGATCGGCTTTCGCTGCACCCGGCGCTTAAGGCTCCCCGAGACGAT	WT	TwoExp	id_uc002hky.2_1645_WT	id_uc002hlk.2_1645_WT	id_uc002hlk.2_1645
ATGGGGTTCGGTATGCGCCAGCTGGCCCCCTGCTGGCAGGCTGAACACCCTGCGGAGCGGGTGAGATCGGCTTTCGCTGCACCCGGCGCTTAAGGCTCCCCGAGACGAT	WT	TwoExp	id_uc002hky.2_1645_WT	id_uc002hlk.2_1645_WT	id_uc002hlk.2_1645
ATGGGGTTCGGTATGCGCCAGCTGGCCCCCTGCTGGCAGGCTGAACACCCTGCGGAGCGGGTGAGATCGGCTTTCGCTGCACCCGGCGCTTAAGGCTCCCCGAGACGAT	WT	TwoExp	id_uc002hky.2_1645_WT	id_uc002hlk.2_1645_WT	id_uc002hlk.2_1645
ATGGGGTTCGGTATGCGCCAGCTGGCCCCCTGCTGGCAGGCTGAACACCCTGCGGAGCGGGTGAGATCGGCTTTCGCTGCACCCGGCGCTTAAGGCTCCCCGAGACGAT	WT	TwoExp	id_uc002hky.2_1645_WT	id_uc002hlk.2_1645_WT	id_uc002hlk.2_1645
ATGGGGTTCGGTATGCGCCAGCTGGCCCCCTGCTGGCAGGCTGAACACCCTGCGGAGCGGGTGAGATCGGCTTTCGCTGCACCCGGCGCTTAAGGCTCCCCGAGACGAT	WT	TwoExp	id_uc002hky.2_1645_WT	id_uc002hlk.2_1645_WT	id_uc002hlk.2_1645
ATGGGGTTCGGTATGCGCCAGCTGGCCCCCTGCTGGCAGGCTGAACACCCTGCGGAGCGGGTGAGATCGGCTTTCGCTGCACCCAAAGGGGAAGGCTCCCCGAGACGAT	WT	TwoExp	id_uc002hky.2_1645_WT	id_uc002hmm.4_1652_WT	id_uc002hmm.4_1652
ATGGGGTTCGGTATGCGCCAGCTGGCCCCCTGCTGGCAGGCTGAACACCCTGCGGAGCGGGTGAGATCGGCTTTCGCTGCACCCAAAGGGGAAGGCTCCCCGAGACGAT	WT	TwoExp	id_uc002hky.2_1645_WT	id_uc002hmm.4_1652_WT	id_uc002hmm.4_1652
ATGGGGTTCGGTATGCGCCAGCTGGCCCCCTGCTGGCAGGCTGAACACCCTGCGGAGCGGGTGAGATCGGCTTTCGCTGCACCCAAAGGGGAAGGCTCCCCGAGACGAT	WT	TwoExp	id_uc002hky.2_1645_WT	id_uc002hmm.4_1652_WT	id_uc002hmm.4_1652
ATGGGGTTCGGTATGCGCCAGCTGGCCCCCTGCTGGCAGGCTGAACACCCTGCGGAGCGGGTGAGATCGGCTTTCGCTGCACCCAAAGGGGAAGGCTCCCCGAGACGAT	WT	TwoExp	id_uc002hky.2_1645_WT	id_uc002hmm.4_1652_WT	id_uc002hmm.4_1652
ATGGGGTTCGGTATGCGCCAGCTGGCCCCCTGCTGGCAGGCTGAACACCCTGCGGAGCGGGTGAGATCGGCTTTCGCTGCACCCAAAGGGGAAGGCTCCCCGAGACGAT	WT	TwoExp	id_uc002hky.2_1645_WT	id_uc002hmm.4_1652_WT	id_uc002hmm.4_1652
ATGGGGTTCGGTATGCGCCAGCTGGCCCCCTGCTGGCAGGCTGAACACCCTGCGGAGCGGGTGAGATCGGCTTTCGCTGCACCCAAAGGGGAAGGCTCCCCGAGACGAT	WT	TwoExp	id_uc002hky.2_1645_WT	id_uc002hmm.4_1652_WT	id_uc002hmm.4_1652
ATGGGGTTCGGTATGCGCCAGCTGGCCCCCTGCTGGCAGGCTGAACACCCTGCGGAGCGGGTGAGATCGGCTTTCGCTGCACCCACATATTAAGGCTCCCCGAGACGAT	WT	TwoExp	id_uc002hky.2_1645_WT	id_uc002hmb.2_2183_WT	id_uc002hmb.2_2183
ATGGGGTTCGGTATGCGCCAGCTGGCCCCCTGCTGGCAGGCTGAACACCCTGCGGAGCGGGTGAGATCGGCTTTCGCTGCACCCACATATTAAGGCTCCCCGAGACGAT	WT	TwoExp	id_uc002hky.2_1645_WT	id_uc002hmb.2_2183_WT	id_uc002hmb.2_2183
ATGGGGTTCGGTATGCGCCAGCTGGCCCCCTGCTGGCAGGCTGAACACCCTGCGGAGCGGGTGAGATCGGCTTTCGCTGCACCCACATATTAAGGCTCCCCGAGACGAT	WT	TwoExp	id_uc002hky.2_1645_WT	id_uc002hmb.2_2183_WT	id_uc002hmb.2_2183
ATGGGGTTCGGTATGCGCCAGCTGGCCCCCTGCTGGCAGGCTGAACACCCTGCGGAGCGGGTGAGATCGGCTTTCGCTGCACCCACATATTAAGGCTCCCCGAGACGAT	WT	TwoExp	id_uc002hky.2_1645_WT	id_uc002hmb.2_2183_WT	id_uc002hmb.2_2183
ATGGGGTTCGGTATGCGCCAGCTGGCCCCCTGCTGGCAGGCTGAACACCCTGCGGAGCGGGTGAGATCGGCTTTCGCTGCACCCACATATTAAGGCTCCCCGAGACGAT	WT	TwoExp	id_uc002hky.2_1645_WT	id_uc002hmb.2_2183_WT	id_uc002hmb.2_2183
ATGGGGTTCGGTATGCGCCAGCTGGCCCCCTGCTGGCAGGCTGAACACCCTGCGGAGCGGGTGAGATCGGCTTTCGCTGCACCCACATATTAAGGCTCCCCGAGACGAT	WT	TwoExp	id_uc002hky.2_1645_WT	id_uc002hmb.2_2183_WT	id_uc002hmb.2_2183
ATGGGGTTCGGTATGCGCCAGCTGGCCCCCTGCTGGCAGGCTGAACACCCTGCGGAGCGGGTGAGATCGGCTTTCGCTGCACCTGAGGACTAAGGCTCCCCGAGACGAT	WT	TwoExp	id_uc002hky.2_1645_WT	id_uc002hky.2_1645_WT	id_uc002hky.2_1645
ATGGGGTTCGGTATGCGCCAGCTGGCCCCCTGCTGGCAGGCTGAACACCCTGCGGAGCGGGTGAGATCGGCTTTCGCTGCACCTGAGGACTAAGGCTCCCCGAGACGAT	WT	TwoExp	id_uc002hky.2_1645_WT	id_uc002hky.2_1645_WT	id_uc002hky.2_1645
ATGGGGTTCGGTATGCGCCAGCTGGCCCCCTGCTGGCAGGCTGAACACCCTGCGGAGCGGGTGAGATCGGCTTTCGCTGCACCTGAGGACTAAGGCTCCCCGAGACGAT	WT	TwoExp	id_uc002hky.2_1645_WT	id_uc002hky.2_1645_WT	id_uc002hky.2_1645
ATGGGGTTCGGTATGCGCCAGCTGGCCCCCTGCTGGCAGGCTGAACACCCTGCGGAGCGGGTGAGATCGGCTTTCGCTGCACCTGAGGACTAAGGCTCCCCGAGACGAT	WT	TwoExp	id_uc002hky.2_1645_WT	id_uc002hky.2_1645_WT	id_uc002hky.2_1645
ATGGGGTTCGGTATGCGCCAGCTGGCCCCCTGCTGGCAGGCTGAACACCCTGCGGAGCGGGTGAGATCGGCTTTCGCTGCACCTGAGGACTAAGGCTCCCCGAGACGAT	WT	TwoExp	id_uc002hky.2_1645_WT	id_uc002hky.2_1645_WT	id_uc002hky.2_1645
ATGGGGTTCGGTATGCGCCAGCTGGCCCCCTGCTGGCAGGCTGAACACCCTGCGGAGCGGGTGAGATCGGCTTTCGCTGCACCTGAGGACTAAGGCTCCCCGAGACGAT	WT	TwoExp	id_uc002hky.2_1645_WT	id_uc002hky.2_1645_WT	id_uc002hky.2_1645
ATGGGGTTCGGTATGCGCCAGCTGGCCCCCTGCTGGCAGGCTGAACACCCTGCGGAGCGGGTGAGATCGGCTTTCGCTGCACCCCCATGACAAGGCTCCCCGAGACGAT	WT	TwoExp	id_uc002hky.2_1645_WT	id_uc002hoo.2_1652_WT	id_uc002hoo.2_1652
ATGGGGTTCGGTATGCGCCAGCTGGCCCCCTGCTGGCAGGCTGAACACCCTGCGGAGCGGGTGAGATCGGCTTTCGCTGCACCCCCATGACAAGGCTCCCCGAGACGAT	WT	TwoExp	id_uc002hky.2_1645_WT	id_uc002hoo.2_1652_WT	id_uc002hoo.2_1652
ATGGGGTTCGGTATGCGCCAGCTGGCCCCCTGCTGGCAGGCTGAACACCCTGCGGAGCGGGTGAGATCGGCTTTCGCTGCACCCCCATGACAAGGCTCCCCGAGACGAT	WT	TwoExp	id_uc002hky.2_1645_WT	id_uc002hoo.2_1652_WT	id_uc002hoo.2_1652
ATGGGGTTCGGTATGCGCCAGCTGGCCCCCTGCTGGCAGGCTGAACACCCTGCGGAGCGGGTGAGATCGGCTTTCGCTGCACCCCCATGACAAGGCTCCCCGAGACGAT	WT	TwoExp	id_uc002hky.2_1645_WT	id_uc002hoo.2_1652_WT	id_uc002hoo.2_1652
ATGGGGTTCGGTATGCGCCAGCTGGCCCCCTGCTGGCAGGCTGAACACCCTGCGGAGCGGGTGAGATCGGCTTTCGCTGCACCCCCATGACAAGGCTCCCCGAGACGAT	WT	TwoExp	id_uc002hky.2_1645_WT	id_uc002hoo.2_1652_WT	id_uc002hoo.2_1652
ATGGGGTTCGGTATGCGCCAGCTGGCCCCCTGCTGGCAGGCTGAACACCCTGCGGAGCGGGTGAGATCGGCTTTCGCTGCACCCCCATGACAAGGCTCCCCGAGACGAT	WT	TwoExp	id_uc002hky.2_1645_WT	id_uc002hoo.2_1652_WT	id_uc002hoo.2_1652
ATGGGGTTCGGTATGCGCCAGCTGGCCCCCTGCTGGCAGGCTGAACACCCTGCGGAGCGGGTGAGATCGGCTTTCGCTGCACCGTGTCCCGAAGGCTCCCCGAGACGAT	WT	TwoExp	id_uc002hky.2_1645_WT	id_uc002hpp.2_1652_WT	id_uc002hpp.2_1652
ATGGGGTTCGGTATGCGCCAGCTGGCCCCCTGCTGGCAGGCTGAACACCCTGCGGAGCGGGTGAGATCGGCTTTCGCTGCACCGTGTCCCGAAGGCTCCCCGAGACGAT	WT	TwoExp	id_uc002hky.2_1645_WT	id_uc002hpp.2_1652_WT	id_uc002hpp.2_1652
ATGGGGTTCGGTATGCGCCAGCTGGCCCCCTGCTGGCAGGCTGAACACCCTGCGGAGCGGGTGAGATCGGCTTTCGCTGCACCGTGTCCCGAAGGCTCCCCGAGACGAT	WT	TwoExp	id_uc002hky.2_1645_WT	id_uc002hpp.2_1652_WT	id_uc002hpp.2_1652
ATGGGGTTCGGTATGCGCCAGCTGGCCCCCTGCTGGCAGGCTGAACACCCTGCGGAGCGGGTGAGATCGGCTTTCGCTGCACCGTGTCCCGAAGGCTCCCCGAGACGAT	WT	TwoExp	id_uc002hky.2_1645_WT	id_uc002hpp.2_1652_WT	id_uc002hpp.2_1652
ATGGGGTTCGGTATGCGCCAGCTGGCCCCCTGCTGGCAGGCTGAACACCCTGCGGAGCGGGTGAGATCGGCTTTCGCTGCACCGTGTCCCGAAGGCTCCCCGAGACGAT	WT	TwoExp	id_uc002hky.2_1645_WT	id_uc002hpp.2_1652_WT	id_uc002hpp.2_1652
ATGGGGTTCGGTATGCGCCAGCTGGCCCCCTGCTGGCAGGCTGAACACCCTGCGGAGCGGGTGAGATCGGCTTTCGCTGCACCGTGTCCCGAAGGCTCCCCGAGACGAT	WT	TwoExp	id_uc002hky.2_1645_WT	id_uc002hpp.2_1652_WT	id_uc002hpp.2_1652
ATGGGGTTCGGTATGCGCCAGCTGGTGTGCTTGGCGGTCCCAGGCCTGTGTAGTGTCTCTCCCCTGCTGCGGGCGCCCCCACCTCTCTAACAAGGCTCCCCGAGACGAT	WT	TwoExp	id_uc003udw.1_1618_WT	id_uc003udw.1_1618_WT	id_uc003udw.1_1618
ATGGGGTTCGGTATGCGCAATGCATGTGCATCCCACAGGAGTGGAGGGGTTCTACTCCCTGACACCTTCACTCCATATGTCACCATATACTAAGGCTCCCCGAGACGAT	WT	PredictedTRUB1	id_uc010jat.1_414_WT	id_uc010jat.1_414_WT	id_uc010jat.1_414
ATGGGGTTCGGTATGCGCTGGAGAATCCAGTGAACTGGACCTACAAGGCATCCGAATCGACTCAGATATTAGCGGCACCCTCATTATCCATAAGGCTCCCCGAGACGAT	WT	TwoExp	id_uc001sku.2_918_WT	id_uc001sku.2_918_WT	id_uc001sku.2_918
ATGGGGTTCGGTATGCGCTTCGCGTTTTCTCTCTCCTTTTTGGAGACAGATTCGCAGTGGTCGCTTCTTCTCCTTGACGGAGTTGATCTGTAAGGCTCCCCGAGACGAT	WT	TwoExp	id_uc001bqd.3_118_WT	id_uc001bqd.3_118_WT	id_uc001bqd.3_118
ATGGGGTTCGGTATGCGCCGGGCTTTGGGAATGAGGGGTTCCCTTGAACATGCGTAGGCTGGAACCCCGTCTGAGAGGTCTCCAACTCATGAAGGCTCCCCGAGACGAT	WT	Pus1	id_uc002eel.3_2398_WT	id_uc002eel.3_2398_WT	id_uc002eel.3_2398
ATGGGGTTCGGTATGCGCTAGTGCCATGTGCCTTTCACACAGGGTTTGCATTTATCAGTCTGTTTTCCGATGATGTGTACATGCGCAAGCAAAGGCTCCCCGAGACGAT	WT	TwoExp	id_uc001giy.1_1507_WT	id_uc001giy.1_1507_WT	id_uc001giy.1_1507
ATGGGGTTCGGTATGCGCATCCTTCCTGGAGAGAGGGAGGTGAAAGCTGGTGTGAGCCCAGTGGGTTCCCGCCCACTCACCCACAACCAACAAGGCTCCCCGAGACGAT	WT	TwoExp	id_uc004brh.3_2811_WT	id_uc004brh.3_2811_WT	id_uc004brh.3_2811
ATGGGGTTCGGTATGCGCGGGTTTCAAAGGGAGCGCACTTCCGCTGCCCTTTCTTTCGCCAGCCTTACGGGCCCGAACCCTCGAAATCCGCAAGGCTCCCCGAGACGAT	WT	TwoExp	id_uc021quf.1_89_WT	id_uc021quf.1_89_WT	id_uc021quf.1_89
ATGGGGTTCGGTATGCGCCCCTGTGTTTTCTGCAAACTGACTTACTTTGTTCCAGCCAAAGCTTGCTAATAATAGAAAACTACAGTAGACAAAGGCTCCCCGAGACGAT	WT	PredictedTRUB1	id_uc001zkd.4_2864_WT	id_uc001zkd.4_2864_WT	id_uc001zkd.4_2864
ATGGGGTTCGGTATGCGCGGGAAGATCAGCTATGCCGACTTTGTCTGGTTTTTGATCTCTGAGGAAGACAAAAAAACACCGACGGGTAGCTAAGGCTCCCCGAGACGAT	WT	Pus1	id_uc004cpg.3_1405_WT	id_uc004cpg.3_1405_WT	id_uc004cpg.3_1405
ATGGGGTTCGGTATGCGCAGTGGAAGAAGGGTTAATCACAAGAAGTTACTTATATGGTAGCCCTGAGCTTTAATTGCAGAGTAGGGCATACAAGGCTCCCCGAGACGAT	WT	Pus1	id_uc004ahr.2_3747_WT	id_uc004ahr.2_3747_WT	id_uc004ahr.2_3747
ATGGGGTTCGGTATGCGCCATGCTTGGGATGTCTCTAGCTGGTCTGGGGATAGCTGGAGCACTTACTCAGGTGGCTGGTGAAATTCCGTCAAAGGCTCCCCGAGACGAT	WT	TwoExp	id_uc001ttk.1_1099_WT	id_uc001ttk.1_1099_WT	id_uc001ttk.1_1099
ATGGGGTTCGGTATGCGCGGGAATCATCCTCGCTCATACGAACCTTCGGCTCTTCCACCACTGATTTTACCACACACTGTTTTTGCCCTGGAAGGCTCCCCGAGACGAT	WT	Pus1	id_uc002vex.4_1954_WT	id_uc002vex.4_1954_WT	id_uc002vex.4_1954
ATGGGGTTCGGTATGCGCTGATTTGGAAAAGTATTGGAGTTAATCTGTATTATATTTATATAGTCCATATGGCACATTTGATTTCTTCGTAAAGGCTCCCCGAGACGAT	WT	TwoExp	id_uc004faz.3_4880_WT	id_uc004faz.3_4880_WT	id_uc004faz.3_4880
ATGGGGTTCGGTATGCGCGGCAAAGGAGCCTACTCCAAGAATGGAGGCTGTAGGAATATAACCTCCCACCCTGCAAAGGGAATGGTCTTGGAAGGCTCCCCGAGACGAT	WT	TwoExp	id_uc001fpq.3_5192_WT	id_uc001fpq.3_5192_WT	id_uc001fpq.3_5192
ATGGGGTTCGGTATGCGCTCCATCTTCACTGAGCAGGAGTTAGAGCTGCTTATATCAGGACTGCCCACCATTGACATCGATGAGTACGGGTAAGGCTCCCCGAGACGAT	WT	Pus1	id_uc004dsp.3_13153_WT	id_uc004dsp.3_13153_WT	id_uc004dsp.3_13153
ATGGGGTTCGGTATGCGCATGGAAGTTGTTCTTCGTCACTTAATGTTGGTTCCAGTCCTTCAACTGTTCATATCTACTTTATACTTTAAAGAAGGCTCCCCGAGACGAT	WT	IdentifiedTRUB1	id_uc001xlc.2_655_WT	id_uc001xlc.2_655_WT	id_uc001xlc.2_655
ATGGGGTTCGGTATGCGCATGGAAGTTGTTCTTCGTCACTTAATGTTGGTTCCAGTCCTTCAACTGTTCATATCTACTTTATACTTTAAAGAAGGCTCCCCGAGACGAT	WT	TwoExp	id_uc001xlc.2_655_WT	id_uc001xlc.2_655_WT	id_uc001xlc.2_655
ATGGGGTTCGGTATGCGCATGGAAGTTGTTCTTCGTCACTTAATGTTGGTTCCAGTCCTTCAACTGTTCATATCTACTTTATAATAGATCTAAGGCTCCCCGAGACGAT	WT	IdentifiedTRUB1	id_uc001xlc.2_655_WT	id_uc001xlc.2_655_WT	id_uc001xlc.2_655
ATGGGGTTCGGTATGCGCATGGAAGTTGTTCTTCGTCACTTAATGTTGGTTCCAGTCCTTCAACTGTTCATATCTACTTTATAATAGATCTAAGGCTCCCCGAGACGAT	WT	TwoExp	id_uc001xlc.2_655_WT	id_uc001xlc.2_655_WT	id_uc001xlc.2_655
ATGGGGTTCGGTATGCGCATTGAGGTCCAGGAAATCAAAGGAAAGGGAAGTGGAGGCTTAAACCTTGGTAATTTCTTTGCAAGAATGATCTAAGGCTCCCCGAGACGAT	WT	TwoExp	id_uc003knv.3_2870_WT	id_uc003knv.3_2870_WT	id_uc003knv.3_2870
ATGGGGTTCGGTATGCGCATCCACTGTCCGGTCAGAATAGAGGGTATGCATTTATCACCTTCTGTGGAAAGGAAGCTGCACAGCCCTCTCAAAGGCTCCCCGAGACGAT	WT	TwoExp	id_uc001bgp.4_788_WT	id_uc001bgp.4_788_WT	id_uc001bgp.4_788
ATGGGGTTCGGTATGCGCCGGGACAGAGGTTCCGGATAACCTGTTTCATTTTGGGTTTTCTTCCTCTTCCCCAGACTCCAGTCGCACCACGAAGGCTCCCCGAGACGAT	WT	Pus1	id_uc002jvw.3_2233_WT	id_uc002jvw.3_2233_WT	id_uc002jvw.3_2233
ATGGGGTTCGGTATGCGCTGGCTTTAGAAGCCTGTGAATTTTGGCTAACTTTAGCTGAACAGCCAATATGCAAAGATGTACTCCCGGTGTAAAGGCTCCCCGAGACGAT	WT	TwoExp	id_uc003kci.4_1006_WT	id_uc003kci.4_1006_WT	id_uc003kci.4_1006
ATGGGGTTCGGTATGCGCCCTCTTCGAGAAATTCATACTCCTGGTGCTGTTCAAGTCAGTAGAAGAACCATTTCTTCGAATTCCAAGAGATAAGGCTCCCCGAGACGAT	WT	PredictedTRUB1	id_uc001vbi.4_1134_WT	id_uc001vbi.4_1134_WT	id_uc001vbi.4_1134
ATGGGGTTCGGTATGCGCCTTAAGCATATTTATGTTGTGAGAAACCTTAATATGAGGTTTATCATGCCCTTTTTCAAGCAGATAGTAAAGCAAGGCTCCCCGAGACGAT	WT	TwoExp	id_uc021zao.1_1822_WT	id_uc021zao.1_1822_WT	id_uc021zao.1_1822
ATGGGGTTCGGTATGCGCTCCCTCTCCCCAGCGCTGTGGTGCAAGCTGTCTTTGGGCGACAGCGTGCCATCATGCTGCTGGAGATAAACCGAAGGCTCCCCGAGACGAT	WT	TwoExp	id_uc001wpm.3_790_WT	id_uc001wpm.3_790_WT	id_uc001wpm.3_790
ATGGGGTTCGGTATGCGCCATGGTACTTGTCTTGATCTTTTTCATAGTGTTCAAATCTGTATTTTTGTATGTAGAGGGAAATACGCGGATCAAGGCTCCCCGAGACGAT	WT	PredictedTRUB1	id_uc002epz.3_3303_WT	id_uc002epz.3_3303_WT	id_uc002epz.3_3303
ATGGGGTTCGGTATGCGCGACAACGTCAGGTATGGCATTTCAAATATAGATACAACCATTGAAGGAACGTCAGATGACCTGACAGCTAATGAAGGCTCCCCGAGACGAT	WT	TwoExp	id_uc002voy.3_1101_WT	id_uc002voy.3_1101_WT	id_uc002voy.3_1101
ATGGGGTTCGGTATGCGCAAACAGGGGCTGGCGAGTTGACAACTGTGGGTTCAAATCCCAGCTCTACCACTTACTAACTGCATAAGGCTACAAGGCTCCCCGAGACGAT	WT	PredictedTRUB1	id_uc003ftv.1_3088_WT	id_uc003ftv.1_3088_WT	id_uc003ftv.1_3088
ATGGGGTTCGGTATGCGCGTCCTCCTTACAGGGTTGACTGAGGTCCCTGTTCCAACCAGGTTTTTGTTTTTGTTATTGGGTCCTAAGCTGGAAGGCTCCCCGAGACGAT	WT	PredictedTRUB1	id_uc003cdu.4_1254_WT	id_uc003cdu.4_1254_WT	id_uc003cdu.4_1254
ATGGGGTTCGGTATGCGCCGTTTGTTCAACGATTAGAGTCCTATGTGATCTGAGTTCAGACCGGAGTAATCCAGGTTGGTTTCAAAGATAAAAGGCTCCCCGAGACGAT	WT	TwoExp	id_uc002gzb.2_1387_WT	id_uc002gzb.2_1387_WT	id_uc002gzb.2_1387
ATGGGGTTCGGTATGCGCCGTTTGTTCAACAATTAAAGTCCTACGTGATGTGAGTTCAGACCAGAGTAATCCAGGTCGGTTTCCTCTACAAAAGGCTCCCCGAGACGAT	WT	TwoExp	id_uc022bxr.1_952_WT	id_uc022bxr.1_952_WT	id_uc022bxr.1_952
ATGGGGTTCGGTATGCGCTCCTGCTGGCAACTGGGTTCTGATTGAAGGTGTTGATCAACCAATTGTGAAGACAGCAACCATAAGCGGAAATAAGGCTCCCCGAGACGAT	WT	TwoExp	id_uc002ihn.2_1926_WT	id_uc002ihn.2_1926_WT	id_uc002ihn.2_1926
ATGGGGTTCGGTATGCGCATCTGATACGTCCTCTATCCGAGGACAATATATTAAATGGATTTTTGGAAATAGGAGATGGAATACGGCCCTCAAGGCTCCCCGAGACGAT	WT	TwoExp	id_uc009yoi.2_92_WT	id_uc009yoi.2_92_WT	id_uc009yoi.2_92
ATGGGGTTCGGTATGCGCATCTGATACGTCCTCTATCCGAGGACAATATATTAAATGGATTTTTGGAAATAGGAGATGGAATACGGCCCTCAAGGCTCCCCGAGACGAT	WT	Dkc1	id_uc009yoi.2_92_WT	id_uc009yoi.2_92_WT	id_uc009yoi.2_92
ATGGGGTTCGGTATGCGCATCTGATACGTCCTCTATCCGAGGACAATATATTAAATGGATTTTTGGAAATAGGAGATGGAATATCCCGAATAAGGCTCCCCGAGACGAT	WT	TwoExp	id_uc009yoi.2_92_WT	id_uc009yoi.2_92_WT	id_uc009yoi.2_92
ATGGGGTTCGGTATGCGCATCTGATACGTCCTCTATCCGAGGACAATATATTAAATGGATTTTTGGAAATAGGAGATGGAATATCCCGAATAAGGCTCCCCGAGACGAT	WT	Dkc1	id_uc009yoi.2_92_WT	id_uc009yoi.2_92_WT	id_uc009yoi.2_92
ATGGGGTTCGGTATGCGCAGCGATTTACTCTTCTCCAATCAGTGCATATTTACAAGAAGCACAGAGTTCAGTATGAAATGAGAGCATGGGGAAGGCTCCCCGAGACGAT	WT	TwoExp	id_uc003osa.4_426_WT	id_uc003osa.4_426_WT	id_uc003osa.4_426
ATGGGGTTCGGTATGCGCGAAGCATTCAAGGACAATGATGCTGGTGGTGTTCAAGTCAGCCCCCATCTTGAAGCGGGCCCTAACTTGGGGTAAGGCTCCCCGAGACGAT	WT	PredictedTRUB1	id_uc001dyz.1_1960_WT	id_uc001dyz.1_1960_WT	id_uc001dyz.1_1960
ATGGGGTTCGGTATGCGCTGCAGCTCAGCAAGGTGAAGTTTCGAAATCAGTATGACAATGATGTCACTGTTTGGAGCCCCCAGTAGATAGGAAGGCTCCCCGAGACGAT	WT	TwoExp	id_uc001mll.3_380_WT	id_uc001mll.3_380_WT	id_uc001mll.3_380
ATGGGGTTCGGTATGCGCTCCTACCAGAGGGGATTGTGACTTGCCTGAATTCTGCCCAGGAGACAGCTCCCAGTGTCCCCCTGCAGCCTAAAAGGCTCCCCGAGACGAT	WT	TwoExp	id_uc001fgr.1_1577_WT	id_uc001fgr.1_1577_WT	id_uc001fgr.1_1577
ATGGGGTTCGGTATGCGCATGGGGAAGGAGCCAAGCAGGAGACGTTCACCTTTGCCTTAACTTTGGTCTTCATTCAATGTGTGTGATATTCAAGGCTCCCCGAGACGAT	WT	TwoExp	id_uc002iph.1_239_WT	id_uc002iph.1_239_WT	id_uc002iph.1_239
ATGGGGTTCGGTATGCGCTTCCAGAAGTGGCCTTGGGCTGGGGATCACCATAGCTTTTCTAGCTACGCTGATCACGCAGTTTCTCCCGCTTAAGGCTCCCCGAGACGAT	WT	Pus1	id_uc003wly.3_862_WT	id_uc003wly.3_862_WT	id_uc003wly.3_862
ATGGGGTTCGGTATGCGCTGTGCCCACATCCCAGGCTTCACCCTGAATGGTTCCATGCCTGAGGGTGGAGACTAAGCCCTGTCCAGTCGCCAAGGCTCCCCGAGACGAT	WT	TwoExp	id_uc001cik.2_2318_WT	id_uc001cik.2_2318_WT	id_uc001cik.2_2318
ATGGGGTTCGGTATGCGCGGGGTAGGGAAGGGAGGGGAAGCACTTTAAAGTCTGAGCCTTTAGAGGTGATTCCTCAAGACCCTTTAGTGTTAAGGCTCCCCGAGACGAT	WT	TwoExp	id_uc011bac.2_4305_WT	id_uc011bac.2_4305_WT	id_uc011bac.2_4305
ATGGGGTTCGGTATGCGCCTGACAAGTTCTTCCTCTTCCTACCGTGGGGTTCGAGCCCCACTTCTGGTTGCATGTTCCCACCAACTTCAGCAAGGCTCCCCGAGACGAT	WT	PredictedTRUB1	id_uc001psf.2_3951_WT	id_uc001psf.2_3951_WT	id_uc001psf.2_3951
ATGGGGTTCGGTATGCGCCTGTGAAGAAGAGGAAGCCGATGGCTCTGGGTTCAAATCCTCAAGTACAAATGGTGTGATACCAGAAGTCGGCAAGGCTCCCCGAGACGAT	WT	TwoExp	id_uc003btn.2_572_WT	id_uc003btn.2_572_WT	id_uc003btn.2_572
ATGGGGTTCGGTATGCGCCCTGTTCTTGAACTCCCTAGGAAGAGGAGTTGTACGCATGTCAGAGAGGTTGCAGGCTGTTTTCAGGGTTTAGAAGGCTCCCCGAGACGAT	WT	TwoExp	id_uc001cwo.3_655_WT	id_uc001cwo.3_655_WT	id_uc001cwo.3_655
ATGGGGTTCGGTATGCGCGTGCCTGTCCTTCCCGGGAGTGGGGAGGCCGGTGTGAGTTTTGATCTTCCAGCTCAGGCAGACACTTACCCGAAAGGCTCCCCGAGACGAT	WT	TwoExp	id_uc001jcu.3_3092_WT	id_uc001jcu.3_3092_WT	id_uc001jcu.3_3092
ATGGGGTTCGGTATGCGCGTGCCTGTCCTTCCCGGGAGTGGGGAGGCCGGTGTGAGTTTTGATCTTCCAGCTCAGGCAGACACTTACCCGAAAGGCTCCCCGAGACGAT	WT	TwoExp	id_uc001jcu.3_3092_WT	id_uc001jcu.3_3092_WT	id_uc001jcu.3_3092
ATGGGGTTCGGTATGCGCGTGCCTGTCCTTCCCGGGAGTGGGGAGGCCGGTGTGAGTTTTGATCTTCCAGCTCAGGCAGACACTTACCCGAAAGGCTCCCCGAGACGAT	WT	TwoExp	id_uc001jcu.3_3092_WT	id_uc001jcu.3_3092_WT	id_uc001jcu.3_3092
ATGGGGTTCGGTATGCGCGTGCCTGTCCTTCCCGGGAGTGGGGAGGCCGGTGTGAGTTTTGATCTTCCAGCTCAGGCAGACACCGTTTTCGAAGGCTCCCCGAGACGAT	WT	TwoExp	id_uc001jcu.3_3092_WT	id_uc009xni.3_2773_WT	id_uc009xni.3_2773
ATGGGGTTCGGTATGCGCGTGCCTGTCCTTCCCGGGAGTGGGGAGGCCGGTGTGAGTTTTGATCTTCCAGCTCAGGCAGACACCGTTTTCGAAGGCTCCCCGAGACGAT	WT	TwoExp	id_uc001jcu.3_3092_WT	id_uc009xni.3_2773_WT	id_uc009xni.3_2773
ATGGGGTTCGGTATGCGCGTGCCTGTCCTTCCCGGGAGTGGGGAGGCCGGTGTGAGTTTTGATCTTCCAGCTCAGGCAGACACCGTTTTCGAAGGCTCCCCGAGACGAT	WT	TwoExp	id_uc001jcu.3_3092_WT	id_uc009xni.3_2773_WT	id_uc009xni.3_2773
ATGGGGTTCGGTATGCGCGTGCCTGTCCTTCCCGGGAGTGGGGAGGCCGGTGTGAGTTTTGATCTTCCAGCTCAGGCAGACACAGCGACATAAGGCTCCCCGAGACGAT	WT	TwoExp	id_uc001jcu.3_3092_WT	id_uc001jjb.3_3119_WT	id_uc001jjb.3_3119
ATGGGGTTCGGTATGCGCGTGCCTGTCCTTCCCGGGAGTGGGGAGGCCGGTGTGAGTTTTGATCTTCCAGCTCAGGCAGACACAGCGACATAAGGCTCCCCGAGACGAT	WT	TwoExp	id_uc001jcu.3_3092_WT	id_uc001jjb.3_3119_WT	id_uc001jjb.3_3119
ATGGGGTTCGGTATGCGCGTGCCTGTCCTTCCCGGGAGTGGGGAGGCCGGTGTGAGTTTTGATCTTCCAGCTCAGGCAGACACAGCGACATAAGGCTCCCCGAGACGAT	WT	TwoExp	id_uc001jcu.3_3092_WT	id_uc001jjb.3_3119_WT	id_uc001jjb.3_3119
ATGGGGTTCGGTATGCGCGCAGATGCAGTGTGGCTCTGGATAGCACCTTATGGACAGTTGTGTCCCCAAGGAAGGATGAGAATGTGTAATCAAGGCTCCCCGAGACGAT	WT	Dkc1	id_uc001gjj.3_76_WT	id_uc001gjj.3_76_WT	id_uc001gjj.3_76
ATGGGGTTCGGTATGCGCCTGTTTTTATGCTCTGTGACCTTGGGCAGAGTTCTAACCTCTCTGAGCCTCCATGCCCTCATCTGCATGCCTCAAGGCTCCCCGAGACGAT	WT	PredictedTRUB1	id_uc001bjf.3_1280_WT	id_uc001bjf.3_1280_WT	id_uc001bjf.3_1280
ATGGGGTTCGGTATGCGCTAAAGCTTTCTTTACTTCAAACACTGAAGCTGTAGGCGAGCCATCCCGTATCGACTTTATACTCAAAGTAGCTAAGGCTCCCCGAGACGAT	WT	TwoExp	id_uc004erk.2_1627_WT	id_uc004erk.2_1627_WT	id_uc004erk.2_1627
ATGGGGTTCGGTATGCGCCTCAGAGCTGGGAGGCCAAGGGTTCACTGGGCTTGAATCCTCTCTAAGCACCTACCCCATTGTGGACCCCCGCAAGGCTCCCCGAGACGAT	WT	Pus1	id_uc010daa.1_1259_WT	id_uc010daa.1_1259_WT	id_uc010daa.1_1259
ATGGGGTTCGGTATGCGCGATGGAAGTTGTTCTTCGTCACTTAATGTTGGTTCCAGTCCTTCAACTGTTCATATCTACTTTATGTTTTCAGAAGGCTCCCCGAGACGAT	WT	TwoExp	id_uc001xlc.2_654_WT	id_uc001xlc.2_654_WT	id_uc001xlc.2_654
ATGGGGTTCGGTATGCGCCAGCTGATTCAGAGTAGGCTACAAGAAGAGCATTCACTTCAAGATGTGATATTTAAAAGTGCTTTATAATGCCAAGGCTCCCCGAGACGAT	WT	Pus1	id_uc001riv.3_548_WT	id_uc001riv.3_548_WT	id_uc001riv.3_548
ATGGGGTTCGGTATGCGCTGCCTTGTGAAGGTTTATGAAGATTGGGATTGTTTCAAAGTAAATGACATTCTTGAGCTATATGGTAGGCCCTAAGGCTCCCCGAGACGAT	WT	TwoExp	id_uc001ler.2_1046_WT	id_uc001ler.2_1046_WT	id_uc001ler.2_1046
ATGGGGTTCGGTATGCGCGAAGTGGAAGAAATTGTGAGGGAAACAATTGTTCAACCCAAATCAGAGTTCCTCGAATTCAGTGCTGACGAAAAAGGCTCCCCGAGACGAT	WT	PredictedTRUB1	id_uc001pbb.3_1576_WT	id_uc001pbb.3_1576_WT	id_uc001pbb.3_1576
ATGGGGTTCGGTATGCGCGTGTGTAACCCCTTGGAGAATGGGGATTATGTTCTATTCATTCATACATTCATTATTTAGTTTATCCACATTAAAGGCTCCCCGAGACGAT	WT	PredictedTRUB1	id_uc002hoj.1_931_WT	id_uc002hoj.1_931_WT	id_uc002hoj.1_931
ATGGGGTTCGGTATGCGCTCACGTAGGGAAATGTTAAGGACTTCTGCAGCTATGCGCAATGTGGCATTGGGGGGCCGGGCAGGCCGTAAGCAAGGCTCCCCGAGACGAT	WT	Pus1	id_uc001ypn.3_2080_WT	id_uc001ypn.3_2080_WT	id_uc001ypn.3_2080
ATGGGGTTCGGTATGCGCGACTACTTGCATGACCAAAGCCAAGATGGCAGTTCCGCCATGGAGTCATAGTTGCAGCTGACTCCACGGATGTAAGGCTCCCCGAGACGAT	WT	TwoExp	id_uc010tni.2_111_WT	id_uc010tni.2_111_WT	id_uc010tni.2_111
ATGGGGTTCGGTATGCGCGAAACCGCCCTTCATTCTGTTTTAATCAGTGTTCTACCCATTGCTTCCCCACCCCAAATATATGCTATAGCTGAAGGCTCCCCGAGACGAT	WT	PredictedTRUB1	id_uc003okz.2_1757_WT	id_uc003okz.2_1757_WT	id_uc003okz.2_1757
ATGGGGTTCGGTATGCGCAACCCTGTGGCAGTGACACGGGCAAATTGGCATTTGAATAAAGCCCTGGGACCACCTCAACATGCTGCAATGGAAGGCTCCCCGAGACGAT	WT	Pus1	id_uc003hbr.3_3200_WT	id_uc003hbr.3_3200_WT	id_uc003hbr.3_3200
ATGGGGTTCGGTATGCGCAAAGTGGATTGCTGACAGAACGGATGTTCATATTCGGGTTTTCAGACCACCCAACTACTCTGGTAATCAACTTAAGGCTCCCCGAGACGAT	WT	TwoExp	id_uc003wwt.3_914_WT	id_uc003wwt.3_914_WT	id_uc003wwt.3_914
ATGGGGTTCGGTATGCGCTGACGGCGGAGGCAGTTGAGTGCGGGATTGAGTTTGACGAGGAGAAAACGGCTGTCATTGACCATGGCGACTTAAGGCTCCCCGAGACGAT	WT	TwoExp	id_uc010odd.1_536_WT	id_uc010odd.1_536_WT	id_uc010odd.1_536
ATGGGGTTCGGTATGCGCAGCTGGATTGATACGGGGAAAACATCTTTCCCTTCTAGTTTTGAGAGACTTCCTCTTGGCTCCCAATGCCATGAAGGCTCCCCGAGACGAT	WT	Pus1	id_uc001xff.4_4699_WT	id_uc001xff.4_4699_WT	id_uc001xff.4_4699
ATGGGGTTCGGTATGCGCCCTGGACTCACAGCAGCTCCACAGTCGGGGGTTCCAGGCCCTGTTCCCTGTGGGCCCCGTGACCCGCCGAGGGAAGGCTCCCCGAGACGAT	WT	PredictedTRUB1	id_uc002qee.1_642_WT	id_uc002qee.1_642_WT	id_uc002qee.1_642
ATGGGGTTCGGTATGCGCCAGCAGATGACCAAAGATACAGTGGATCAACTTACCTGTCTGATCCTCGTCTTACAGCGAATGGTATCGGCCTAAGGCTCCCCGAGACGAT	WT	TwoExp	id_uc002urh.4_2949_WT	id_uc002urh.4_2949_WT	id_uc002urh.4_2949
ATGGGGTTCGGTATGCGCCAGGCAATTACCTCCCCAAGAGAAGCCTTCCTTATTTTGGAGTAAGGTCCTAAGATAGCTGGATGAACAGTGGAAGGCTCCCCGAGACGAT	WT	TwoExp	id_uc002iqw.1_1733_WT	id_uc002iqw.1_1733_WT	id_uc002iqw.1_1733
ATGGGGTTCGGTATGCGCAAAGCAGCCTTAGTCCATCTCTTGACTCACTTCTCTTTGGTCCTTCAGCCTCACAAGTGCTATATCGATTTTTAAGGCTCCCCGAGACGAT	WT_pmut_0_C	WT_pmut_0_C	id_uc004dfb.3_3872_WT_pmut_0_C	id_uc004dfb.3_3872_WT_pmut_0_C	id_uc004dfb.3_3872
ATGGGGTTCGGTATGCGCGCCCTAACGGTGATTAGCCTTGTGGGGACAGTCCTATTCTTTCTCATTCGGAAACCAGATTCTGACCTCAAGGAAGGCTCCCCGAGACGAT	WT_pmut_0_C	WT_pmut_0_C	id_uc002jta.2_1529_WT_pmut_0_C	id_uc002jte.3_1408_WT_pmut_0_C	id_uc002jte.3_1408
ATGGGGTTCGGTATGCGCGCCCTAACGGTGATTAGCCTTGTGGGGACAGTCCTATTCTTTCTCATTCGGAAACCAGATTCTGATTTTGTTTAAGGCTCCCCGAGACGAT	WT_pmut_0_C	WT_pmut_0_C	id_uc002jta.2_1529_WT_pmut_0_C	id_uc002jta.2_1529_WT_pmut_0_C	id_uc002jta.2_1529
ATGGGGTTCGGTATGCGCTTCGCAGTGGTCGCTTCTTCTCCTTGGATTTGCTAAGGATTCCAAGTAACTCTTATTTGGAGAGATGAAAAGCAAGGCTCCCCGAGACGAT	WT_pmut_0_C	WT_pmut_0_C	id_uc001bqa.2_150_WT_pmut_0_C	id_uc001bqa.2_150_WT_pmut_0_C	id_uc001bqa.2_150
ATGGGGTTCGGTATGCGCAGGAAAGCAACTGACAATGTACCGGGTTTGGACTCAGTGCAAATACTGCAAGCCCCTTCTGTCCATTGTGTCTAAGGCTCCCCGAGACGAT	WT_pmut_0_C	WT_pmut_0_C	id_uc002izv.2_1113_WT_pmut_0_C	id_uc002izv.2_1113_WT_pmut_0_C	id_uc002izv.2_1113
ATGGGGTTCGGTATGCGCAGGGAAGCAACTGACAATGTACCGGGTTTGGACTCAGTGCAAATACTGCAAGCCCCTTCTGTCCAGGGTATCAAAGGCTCCCCGAGACGAT	WT_pmut_0_C	WT_pmut_0_C	id_uc003vnf.3_1132_WT_pmut_0_C	id_uc003vnf.3_1132_WT_pmut_0_C	id_uc003vnf.3_1132
ATGGGGTTCGGTATGCGCGGTGAAATGCTTTTGGATAAACGTAAGCCTATCTTCTGACGTTTCTTAATGCAAACTCTTTGCCTCTTACGTCAAGGCTCCCCGAGACGAT	WT_pmut_0_C	WT_pmut_0_C	id_uc003klr.4_2700_WT_pmut_0_C	id_uc003klr.4_2700_WT_pmut_0_C	id_uc003klr.4_2700
ATGGGGTTCGGTATGCGCTAGGGCTTTTTCCTGATTTTGGGTATACAAGTCCCAAACTTGCATAATAATTGCTAACGCACTAGAACTTTTTAAGGCTCCCCGAGACGAT	WT_pmut_0_C	WT_pmut_0_C	id_uc004dur.3_4333_WT_pmut_0_C	id_uc004dur.3_4333_WT_pmut_0_C	id_uc004dur.3_4333
ATGGGGTTCGGTATGCGCACTCCTTCCCAAGAATTTATAGCACTTAATGTCCAATTCATCAGAATTTTTCAGGTATTAGTCCAACTTATCCAAGGCTCCCCGAGACGAT	WT_pmut_0_C	WT_pmut_0_C	id_uc002vdk.2_6128_WT_pmut_0_C	id_uc002vdk.2_6128_WT_pmut_0_C	id_uc002vdk.2_6128
ATGGGGTTCGGTATGCGCGGCTTTTAAAGGCAAATCATTCCCACCATCACCTAACGCCGGGATTATACACATTCTAGAAATGACTATTGGAAAGGCTCCCCGAGACGAT	WT_pmut_0_C	WT_pmut_0_C	id_uc003qng.2_2967_WT_pmut_0_C	id_uc003qng.2_2967_WT_pmut_0_C	id_uc003qng.2_2967
ATGGGGTTCGGTATGCGCCTCTTGGAACAAGTCTTGCTTTTCGAACATGGCATAATAGCCTTGTTTGTGTTAGCAAAGTGGAATCAACATAAAGGCTCCCCGAGACGAT	WT_pmut_0_C	WT_pmut_0_C	id_uc002bww.3_908_WT_pmut_0_C	id_uc002bww.3_908_WT_pmut_0_C	id_uc002bww.3_908
ATGGGGTTCGGTATGCGCTAAAGACTCCAACGGAGGGAGCCTGTTGGTGTCAAATTGTTTACATTTCTTTATACAAATAATGTGGAAGAACAAGGCTCCCCGAGACGAT	WT_pmut_0_C	WT_pmut_0_C	id_uc002rnl.3_4348_WT_pmut_0_C	id_uc002rnl.3_4348_WT_pmut_0_C	id_uc002rnl.3_4348
ATGGGGTTCGGTATGCGCTCCTAGAACTGCAAACCGGGAGAGGATGTAGTCAGATTCTGGCATCCTGCCCCGGCTCTTTGAGGCGATACCAAAGGCTCCCCGAGACGAT	WT_pmut_0_C	WT_pmut_0_C	id_uc001amk.3_3144_WT_pmut_0_C	id_uc001amk.3_3144_WT_pmut_0_C	id_uc001amk.3_3144
ATGGGGTTCGGTATGCGCAAAGAGCAGCTTCAGAGATAATTCCTTGGTTCCATGATCCCTGTTTAACTCCAAATTACAGTCGGCTGGGCAGAAGGCTCCCCGAGACGAT	WT_pmut_0_C	WT_pmut_0_C	id_uc001bou.4_2797_WT_pmut_0_C	id_uc001bou.4_2797_WT_pmut_0_C	id_uc001bou.4_2797
ATGGGGTTCGGTATGCGCGTCGCTGTGAAGATCTGGAGAAACAAAACAGACTACTTCATGATCAGATCGAAAAATTAAGTGACAAATAGCTAAGGCTCCCCGAGACGAT	WT_pmut_0_C	WT_pmut_0_C	id_uc001grv.3_3770_WT_pmut_0_C	id_uc001grv.3_3770_WT_pmut_0_C	id_uc001grv.3_3770
ATGGGGTTCGGTATGCGCTCCTTTCTTCCATCCCCTTGGCCTGCTCCCTGCAGGAAGTCATCCTGCCAACTGATTTAAAAGGGTGTGGATCAAGGCTCCCCGAGACGAT	WT_pmut_0_C	WT_pmut_0_C	id_uc002ihz.3_2279_WT_pmut_0_C	id_uc002ihz.3_2279_WT_pmut_0_C	id_uc002ihz.3_2279
ATGGGGTTCGGTATGCGCGCTTACCAGCTTCTATCAGAATGCTTGAGGGTCCTAAACCCTCAGGGGACCCTGATTCAGTTCTCGTAATCGCAAGGCTCCCCGAGACGAT	WT_pmut_0_C	WT_pmut_0_C	id_uc001nug.1_821_WT_pmut_0_C	id_uc001nug.1_821_WT_pmut_0_C	id_uc001nug.1_821
ATGGGGTTCGGTATGCGCAGCAAGCAGGTTTTAAGGAGAGTGATGTAGGTCTTATTCCTACAAGTGGTCTCAGTGGTGAAAATTAGCAGACAAGGCTCCCCGAGACGAT	WT_pmut_0_C	WT_pmut_0_C	id_uc003qez.2_1529_WT_pmut_0_C	id_uc003qez.2_1529_WT_pmut_0_C	id_uc003qez.2_1529
ATGGGGTTCGGTATGCGCTAGTGCCCCGAAGCACCCCACGAGGATCTACTCCAGGGAAACAGAAACCACACTGCCGAGGAATGATCGGTAAAAGGCTCCCCGAGACGAT	WT_pmut_0_C	WT_pmut_0_C	id_uc002rjw.1_1138_WT_pmut_0_C	id_uc002rjw.1_1138_WT_pmut_0_C	id_uc002rjw.1_1138
ATGGGGTTCGGTATGCGCGGTGGTGTAGGGCAAAGCTGTTAGAAAGATTGCAGCGTTTTACTCTCCCTGGGCTTTCCTCCGCCCTATCGACAAGGCTCCCCGAGACGAT	WT_pmut_0_C	WT_pmut_0_C	id_uc002gta.3_1978_WT_pmut_0_C	id_uc002gta.3_1978_WT_pmut_0_C	id_uc002gta.3_1978
ATGGGGTTCGGTATGCGCCAGTCTGTCACCTCCCTCCCCGCCACTTTGTGCAGATCCTACCTGGAGGGAATGGCTTTAGGCACAAAGGGTAAAGGCTCCCCGAGACGAT	WT_pmut_0_C	WT_pmut_0_C	id_uc002jvw.3_2852_WT_pmut_0_C	id_uc002jvw.3_2852_WT_pmut_0_C	id_uc002jvw.3_2852
ATGGGGTTCGGTATGCGCCTCAGGGAGGCAGCAAGTCAGAAGGCCTAGGTCCTAGTCCTAGCTCCATCATTTACCAACTGTGTCTGACTGCAAGGCTCCCCGAGACGAT	WT_pmut_0_C	WT_pmut_0_C	id_uc004eda.3_2469_WT_pmut_0_C	id_uc004eda.3_2469_WT_pmut_0_C	id_uc004eda.3_2469
ATGGGGTTCGGTATGCGCCTCAGGGAGGCAGCAAGTCAGAAGGCCTAGGTCCTAGTCCTAGCTCCATCATTTACCAACTGTGTGCACTAGGAAGGCTCCCCGAGACGAT	WT_pmut_0_C	WT_pmut_0_C	id_uc004eda.3_2469_WT_pmut_0_C	id_uc004eda.3_2469_WT_pmut_0_C	id_uc004eda.3_2469
ATGGGGTTCGGTATGCGCACTGTCACTTTCGTCTCCAGCAGAGGGAGCTGCAGGAATAGTGCTTCCAGATGTGGTCTCCCGTGTGACCAGTAAGGCTCCCCGAGACGAT	WT_pmut_0_C	WT_pmut_0_C	id_uc001amd.3_1136_WT_pmut_0_C	id_uc001amd.3_1136_WT_pmut_0_C	id_uc001amd.3_1136
ATGGGGTTCGGTATGCGCACGAAACCATGGTCAGGTGGTCTCTTACCTGTCAAAATCAGGAGCTGACAAAGAAATTCTTACCAGGTAGTAGAAGGCTCCCCGAGACGAT	WT_pmut_0_C	WT_pmut_0_C	id_uc002iso.3_447_WT_pmut_0_C	id_uc002iso.3_447_WT_pmut_0_C	id_uc002iso.3_447
ATGGGGTTCGGTATGCGCTGTATTGACAACAGAGAAACAGAACTTCCTACCTTTTGACATGACAACACATCCCCTCACCAATACGTAAGGCAAGGCTCCCCGAGACGAT	WT_pmut_0_C	WT_pmut_0_C	id_uc003jhp.1_873_WT_pmut_0_C	id_uc003jhp.1_873_WT_pmut_0_C	id_uc003jhp.1_873
ATGGGGTTCGGTATGCGCAACAAACAAGATCGAACACTCACTATTGTGGACACTGGAATTGGAATGACCAAGGCTGACTTGATGGTTGTTTAAGGCTCCCCGAGACGAT	WT_pmut_0_C	WT_pmut_0_C	id_uc021xvo.1_100_WT_pmut_0_C	id_uc021xvo.1_100_WT_pmut_0_C	id_uc021xvo.1_100
ATGGGGTTCGGTATGCGCGGAAGGGCAGCAGTACACATGACCCCATCCTTCTCTTTGTTTTTACCCCCTGGCTGCCACCACTGATGGTAACAAGGCTCCCCGAGACGAT	WT_pmut_0_C	WT_pmut_0_C	id_uc002sna.1_3247_WT_pmut_0_C	id_uc002sna.1_3247_WT_pmut_0_C	id_uc002sna.1_3247
ATGGGGTTCGGTATGCGCTAATTGGTGTGTGGTATAGAAGAAAAACGGGTCCAAACCCCACTTCTGCCACCTACCAGCTATATAAAATTTGAAGGCTCCCCGAGACGAT	WT_pmut_0_C	WT_pmut_0_C	id_uc002exa.3_1354_WT_pmut_0_C	id_uc002exa.3_1354_WT_pmut_0_C	id_uc002exa.3_1354
ATGGGGTTCGGTATGCGCTAATTGGTGTGTGGTATAGAAGAAAAACGGGTCCAAACCCCACTTCTGCCACCTACCAGCTATATCGAGGTTTAAGGCTCCCCGAGACGAT	WT_pmut_0_C	WT_pmut_0_C	id_uc002exa.3_1354_WT_pmut_0_C	id_uc002exa.3_1354_WT_pmut_0_C	id_uc002exa.3_1354
ATGGGGTTCGGTATGCGCCACCTTCCACCAGTGTGTGCGACTCAGCAAGTCTGACTCTGAACGCAGCATCAGCTTTATCCCGCTTACATACAAGGCTCCCCGAGACGAT	WT_pmut_0_C	WT_pmut_0_C	id_uc003fmw.3_922_WT_pmut_0_C	id_uc003fmw.3_922_WT_pmut_0_C	id_uc003fmw.3_922
ATGGGGTTCGGTATGCGCCACCTTCCACCAGTGTGTGCGACTCAGCAAGTCTGACTCTGAACGCAGCATCAGCTTTATCCCGCCAGCCAGCAAGGCTCCCCGAGACGAT	WT_pmut_0_C	WT_pmut_0_C	id_uc003fmw.3_922_WT_pmut_0_C	id_uc011bqy.2_777_WT_pmut_0_C	id_uc011bqy.2_777
ATGGGGTTCGGTATGCGCGAGCTTGCACTAGCACTCATTTATCTCAGAGTCCAAATCTCTCCCTGCCTTCTACTCAAAGCCTCACGCAGCGAAGGCTCCCCGAGACGAT	WT_pmut_0_C	WT_pmut_0_C	id_uc003kji.2_1248_WT_pmut_0_C	id_uc003kji.2_1248_WT_pmut_0_C	id_uc003kji.2_1248
ATGGGGTTCGGTATGCGCCAAGTCTGTATGCGAAGTAGGTAGCAACTGGTCCCAGCCCATCTACCTCGGAGCCATGTTCTCCTAGCTCAACAAGGCTCCCCGAGACGAT	WT_pmut_0_C	WT_pmut_0_C	id_uc004bjg.3_450_WT_pmut_0_C	id_uc004bjg.3_450_WT_pmut_0_C	id_uc004bjg.3_450
ATGGGGTTCGGTATGCGCTGAGAGGACAAGTGAGGTCTGCTCAGACCTTGCAGGCTTCTATCAAAACAGCACCCTGCTTGCTCCAGTTGTTAAGGCTCCCCGAGACGAT	WT_pmut_0_C	WT_pmut_0_C	id_uc002aga.3_4006_WT_pmut_0_C	id_uc002aga.3_4006_WT_pmut_0_C	id_uc002aga.3_4006
ATGGGGTTCGGTATGCGCGTTAATGTGAACTTTGGGGCTTCTGCTTCATTCTTACCCAACAAGCAACAATGCCCCTTGTCCTGACCACAAGAAGGCTCCCCGAGACGAT	WT_pmut_0_C	WT_pmut_0_C	id_uc010bnp.1_4124_WT_pmut_0_C	id_uc010bnp.1_4124_WT_pmut_0_C	id_uc010bnp.1_4124
ATGGGGTTCGGTATGCGCTACGAAATCAGGGTCAAGACAAATCTTCCTATCTTCAAGCTGAAAGAATCTACTGTTAGAAGAAGCTCACTATAAGGCTCCCCGAGACGAT	WT_pmut_0_C	WT_pmut_0_C	id_uc003psh.3_517_WT_pmut_0_C	id_uc003psh.3_517_WT_pmut_0_C	id_uc003psh.3_517
ATGGGGTTCGGTATGCGCAGCAGGCATGCAGCTCTGAGACTCCTGAGTTTCATGCCATTATCAAAAGCATTTTCAAGAATCCCTTAGCTAGAAGGCTCCCCGAGACGAT	WT_pmut_0_C	WT_pmut_0_C	id_uc002xxl.1_1941_WT_pmut_0_C	id_uc002xxl.1_1941_WT_pmut_0_C	id_uc002xxl.1_1941
ATGGGGTTCGGTATGCGCCACTTCTGTCAAGCTTTCCACAGAGAGAATGACACACTAATCATCATCATCAGAAATGAAGATATAAATCGGGAAGGCTCCCCGAGACGAT	WT_pmut_0_C	WT_pmut_0_C	id_uc001iij.3_7307_WT_pmut_0_C	id_uc001iij.3_7307_WT_pmut_0_C	id_uc001iij.3_7307
ATGGGGTTCGGTATGCGCCAGACCAACCTGTCAGTGCTGCAAGATGAATTCTTAGATGTGATCTACTGGTTCCGACAGATCATTCGTGTTTAAGGCTCCCCGAGACGAT	WT_pmut_0_C	WT_pmut_0_C	id_uc002xfo.3_318_WT_pmut_0_C	id_uc002xfo.3_318_WT_pmut_0_C	id_uc002xfo.3_318
ATGGGGTTCGGTATGCGCCCACACCAGTGAGAAGCATCAGCACCGTGAACCTGTCTGAGAATAGCAGTGTTGTCATCCCCCCACCTAACCTAAGGCTCCCCGAGACGAT	WT_pmut_0_C	WT_pmut_0_C	id_uc003upj.3_1540_WT_pmut_0_C	id_uc003upj.3_1540_WT_pmut_0_C	id_uc003upj.3_1540
ATGGGGTTCGGTATGCGCGTTGTCGCCCTCACTCCGTGAGGAGATCCACCCATGATCTCAGGTCCTCAGACCAACCAGCCCAAGACTTAAAAAGGCTCCCCGAGACGAT	WT_pmut_0_C	WT_pmut_0_C	id_uc001kra.4_613_WT_pmut_0_C	id_uc001kra.4_613_WT_pmut_0_C	id_uc001kra.4_613
ATGGGGTTCGGTATGCGCCCCATGTCTGTGGTCAACAGAGGCGACCCATACCCTCAGGAGGTAAGCGCCACTGTCCAAAAAGTGAGGTCAGAAGGCTCCCCGAGACGAT	WT_pmut_0_C	WT_pmut_0_C	id_uc002lgp.4_964_WT_pmut_0_C	id_uc002lgp.4_964_WT_pmut_0_C	id_uc002lgp.4_964
ATGGGGTTCGGTATGCGCGCGAGCCAGAGGATTGTGCTGGCATCGTGTCTCTCCTGTGCTCTGAAGATGCCAGCTACATCACTTGCAAACAAAGGCTCCCCGAGACGAT	WT_pmut_0_C	WT_pmut_0_C	id_uc001wla.3_794_WT_pmut_0_C	id_uc001wla.3_794_WT_pmut_0_C	id_uc001wla.3_794
ATGGGGTTCGGTATGCGCGCAGAGGAGCCCGCCAATGAGCTGCCCATGAACGAGATTGAGGCGTGGAAGGCTGCGGAAAAGAATGTGTTCAAAGGCTCCCCGAGACGAT	WT_pmut_0_C	WT_pmut_0_C	id_uc002onj.4_695_WT_pmut_0_C	id_uc002onj.4_695_WT_pmut_0_C	id_uc002onj.4_695
ATGGGGTTCGGTATGCGCAAAATTCTCAGAAAACCGATGCCAAAAAGCTTCACCCATGGCCCACAGTGCCTACCAGTCAAATTCAAGTGACAAGGCTCCCCGAGACGAT	WT_pmut_0_C	WT_pmut_0_C	id_uc002ixi.3_1554_WT_pmut_0_C	id_uc002ixi.3_1554_WT_pmut_0_C	id_uc002ixi.3_1554
ATGGGGTTCGGTATGCGCAGAGGGATGAAGAAGAGGGTTTACTGGCCGGTCAGAACCCGTGACTGTATTCTCTCCCTTGGATAGTCATGTGAAGGCTCCCCGAGACGAT	WT_pmut_0_C	WT_pmut_0_C	id_uc003hrt.3_3409_WT_pmut_0_C	id_uc003hrt.3_3409_WT_pmut_0_C	id_uc003hrt.3_3409
ATGGGGTTCGGTATGCGCGAGTTCTGGAGCGCCCTGCTTGAGAAGGCCTACGCCAAGGTAAATGGCAGCTACGAGGCCCTGTCCCGGCAACAAGGCTCCCCGAGACGAT	WT_pmut_0_C	WT_pmut_0_C	id_uc009yqd.2_783_WT_pmut_0_C	id_uc009yqd.2_783_WT_pmut_0_C	id_uc009yqd.2_783
ATGGGGTTCGGTATGCGCGTGTGAAGCACTTTATACACCTGTAAGCTCTACTATCAAGTCCTAAATTTTGGAATGATTGTCTCTACTTAATAAGGCTCCCCGAGACGAT	WT_pmut_0_C	WT_pmut_0_C	id_uc002blc.1_562_WT_pmut_0_C	id_uc002blc.1_562_WT_pmut_0_C	id_uc002blc.1_562
ATGGGGTTCGGTATGCGCAAAAACCACCCTTCTCTGAGATGCCACGAAGACTTACCACTCTTCCTGCGGTGTTTCACTGTTGGTGGAGCGCAAGGCTCCCCGAGACGAT	WT_pmut_0_C	WT_pmut_0_C	id_uc001zff.3_2248_WT_pmut_0_C	id_uc001zff.3_2248_WT_pmut_0_C	id_uc001zff.3_2248
ATGGGGTTCGGTATGCGCGGCCCAGCTCCCCTCCGTGGGACAGGAACAGTCCTATTCTATTCTGGCAGCAAATGATGACATGGTCTGGCGTAAGGCTCCCCGAGACGAT	WT_pmut_0_C	WT_pmut_0_C	id_uc001dxm.2_1099_WT_pmut_0_C	id_uc001dxm.2_1099_WT_pmut_0_C	id_uc001dxm.2_1099
ATGGGGTTCGGTATGCGCCACAAGAAGAAACGCCTGGTGCAGAGCCCCAACTCCTACTTCATGGATGTGAAATGCCCAGGATGTTGGTTAAAAGGCTCCCCGAGACGAT	WT_pmut_0_C	WT_pmut_0_C	id_uc001fdv.3_122_WT_pmut_0_C	id_uc001fdv.3_122_WT_pmut_0_C	id_uc001fdv.3_122
ATGGGGTTCGGTATGCGCATCTGTGTCATACACCATCCTTACCCCATTGTCCAATCCAATGATTTATAGTCTGAGAAATAAGGAGCAAGACAAGGCTCCCCGAGACGAT	WT_pmut_0_C	WT_pmut_0_C	id_uc010pij.2_855_WT_pmut_0_C	id_uc010pij.2_855_WT_pmut_0_C	id_uc010pij.2_855
ATGGGGTTCGGTATGCGCATCAGTATCCTACACTATTATAACTCCATTGTCCAACCCAATGATTTATAGCTTGAGAAATAAAGATCTACTGAAGGCTCCCCGAGACGAT	WT_pmut_0_C	WT_pmut_0_C	id_uc010pii.2_855_WT_pmut_0_C	id_uc010pii.2_855_WT_pmut_0_C	id_uc010pii.2_855
ATGGGGTTCGGTATGCGCACCGAAAACTCCACCGTAGCCCTTGCCAAAGTCCGATCCTTTGGTACAGAAGACAGACCGACAGAGTTAGCGTAAGGCTCCCCGAGACGAT	WT_pmut_0_C	WT_pmut_0_C	id_uc002nva.4_320_WT_pmut_0_C	id_uc002nva.4_320_WT_pmut_0_C	id_uc002nva.4_320
ATGGGGTTCGGTATGCGCACCGAAAACTCCACCGTAGCCCTTGCCAAAGTCCGATCCTTTGGTACAGAAGACAGACCGACAGAATGTGACAAAGGCTCCCCGAGACGAT	WT_pmut_0_C	WT_pmut_0_C	id_uc002nva.4_320_WT_pmut_0_C	id_uc002nva.4_320_WT_pmut_0_C	id_uc002nva.4_320
ATGGGGTTCGGTATGCGCTTTGTAGAGGACACGCAGGAGAAAGAAGGTATCCTGCCTGAGAGAGCTGAAGAGGCAAAGCTAAACTGGGTTGAAGGCTCCCCGAGACGAT	WT_pmut_0_C	WT_pmut_0_C	id_uc001evb.3_98_WT_pmut_0_C	id_uc001evb.3_98_WT_pmut_0_C	id_uc001evb.3_98
ATGGGGTTCGGTATGCGCTCCTCTCAAGCTTGGCGTTTGTTTGGTGGGGTCACACGCGGGTTCAACATGCGTATCGAAAAGTGTCGAACAGAAGGCTCCCCGAGACGAT	WT_pmut_0_C	WT_pmut_0_C	id_uc002acn.3_129_WT_pmut_0_C	id_uc002acn.3_129_WT_pmut_0_C	id_uc002acn.3_129
ATGGGGTTCGGTATGCGCGTTTGTTCCTGTGCCTTGGCGAGTCGCCGGCCCGCTGGGAACGGGACTTCTAAAAGGAACTATGTGTTCGGTAAAGGCTCCCCGAGACGAT	WT_pmut_0_C	WT_pmut_0_C	id_uc003fys.3_81_WT_pmut_0_C	id_uc003fys.3_81_WT_pmut_0_C	id_uc003fys.3_81
ATGGGGTTCGGTATGCGCTGTGCATCACCAATGAATGAATCAGGTTGAGTCCCATCCTCTTCACCTAAAACTTCCTTAAGTGAACTACTCGAAGGCTCCCCGAGACGAT	WT_pmut_0_C	WT_pmut_0_C	id_uc003qdz.3_685_WT_pmut_0_C	id_uc003qdz.3_685_WT_pmut_0_C	id_uc003qdz.3_685
ATGGGGTTCGGTATGCGCAAACGTTTTGGCAAAATGTTATGGTGGTGATACTACCCGAAAAATGAAGCTTTTGAAGAGACAAGAATCCACCAAGGCTCCCCGAGACGAT	WT_pmut_0_C	WT_pmut_0_C	id_uc003gww.4_2094_WT_pmut_0_C	id_uc003gww.4_2094_WT_pmut_0_C	id_uc003gww.4_2094
ATGGGGTTCGGTATGCGCCAAGCGGTTCTGTTCACTAAATTTTTCTCCTGCAAGCTTTGAATGGAAACTTCTGTATCACATGAAGTAGTCAAAGGCTCCCCGAGACGAT	WT_pmut_0_C	WT_pmut_0_C	id_uc003xsk.4_2982_WT_pmut_0_C	id_uc003xsk.4_2982_WT_pmut_0_C	id_uc003xsk.4_2982
ATGGGGTTCGGTATGCGCGAGAGACTGTTGGAGCCTCTTGTTACACAGGTCACAACCCTTGTAAACACCAATAGTAAAGGGCCACGCCAGAAAGGCTCCCCGAGACGAT	WT_pmut_0_C	WT_pmut_0_C	id_uc003ldh.3_204_WT_pmut_0_C	id_uc003ldh.3_204_WT_pmut_0_C	id_uc003ldh.3_204
ATGGGGTTCGGTATGCGCAAGCAGGGACCACATTGCCATTTATTCATTGTCCCAGGCAATGCATTTGTCCAAACCCCTCTGGCGAATCAACAAGGCTCCCCGAGACGAT	WT_pmut_0_C	WT_pmut_0_C	id_uc003xrh.1_4206_WT_pmut_0_C	id_uc003xrh.1_4206_WT_pmut_0_C	id_uc003xrh.1_4206
ATGGGGTTCGGTATGCGCAAAGTAGCCTGAAAGCCAGTGGTGCAACCCCACCCCCACAACCTTCACCACCTCTAGCACCTCCAATACCGGAAAGGCTCCCCGAGACGAT	WT_pmut_0_C	WT_pmut_0_C	id_uc002ikk.3_700_WT_pmut_0_C	id_uc002ikk.3_700_WT_pmut_0_C	id_uc002ikk.3_700
ATGGGGTTCGGTATGCGCAAAGTAGCCTGAAAGCCAGTGGTGCAACCCCACCCCCACAACCTTCACCACCTCTAGCACCTCCATATAGCCGAAGGCTCCCCGAGACGAT	WT_pmut_0_C	WT_pmut_0_C	id_uc002ikk.3_700_WT_pmut_0_C	id_uc002iks.2_700_WT_pmut_0_C	id_uc002iks.2_700
ATGGGGTTCGGTATGCGCGTGATAATTTTGTATTTTCACAAAAAAAAAGTCAAACTCTTCTTTTCTTTTTATTATAATGACCACTAACGTGAAGGCTCCCCGAGACGAT	WT_pmut_0_C	WT_pmut_0_C	id_uc001pha.3_3490_WT_pmut_0_C	id_uc001pha.3_3490_WT_pmut_0_C	id_uc001pha.3_3490
ATGGGGTTCGGTATGCGCTCATTTTTCTATTGTCCTGACCGCCAAAGATTCTAACCCAGAGAAGTATGCTGCCTTCACTAGGAATGGTAGCAAGGCTCCCCGAGACGAT	WT_pmut_0_C	WT_pmut_0_C	id_uc010nrh.3_509_WT_pmut_0_C	id_uc010nrh.3_509_WT_pmut_0_C	id_uc010nrh.3_509
ATGGGGTTCGGTATGCGCTTAGAGCACAGGCTGCAAAGCCCTGCATTCTTCTCTTTGATGAATTTGAATCCATTGCTCCTCGGCTTGCCGGAAGGCTCCCCGAGACGAT	WT_pmut_0_C	WT_pmut_0_C	id_uc003uly.3_2909_WT_pmut_0_C	id_uc003uly.3_2909_WT_pmut_0_C	id_uc003uly.3_2909
ATGGGGTTCGGTATGCGCCTGCAGCGCTGGTGGAGGAGGAAACTCGCAGACACCGACCTACTAAGAACTACCTGAGCTACCTGCTTATAGTAAGGCTCCCCGAGACGAT	WT_pmut_0_C	WT_pmut_0_C	id_uc001eez.3_2937_WT_pmut_0_C	id_uc001eez.3_2937_WT_pmut_0_C	id_uc001eez.3_2937
ATGGGGTTCGGTATGCGCTGTTCAAAGGTTGCCATGTGGCTGGCAGTGGTCCAAGCCCACATTTGACACTGCTGCTCTAGAGGGACGACGAAAGGCTCCCCGAGACGAT	WT_pmut_0_C	WT_pmut_0_C	id_uc004dwq.3_2510_WT_pmut_0_C	id_uc004dwq.3_2510_WT_pmut_0_C	id_uc004dwq.3_2510
ATGGGGTTCGGTATGCGCTCTAGAGATCAGGTTCTGGACAATGCTGCAGTCCAATTCTGTGCCCGCAAAGTCTCTGCTGTTTCCTAAGGTAAAGGCTCCCCGAGACGAT	WT_pmut_0_C	WT_pmut_0_C	id_uc002huj.1_1330_WT_pmut_0_C	id_uc002huj.1_1330_WT_pmut_0_C	id_uc002huj.1_1330
ATGGGGTTCGGTATGCGCTCTAGAGATCAGGTTCTGGACAATGCTGCAGTCCAATTCTGTGCCCGCAAAGTCTCTGCTGTTTCAATTCCGCAAGGCTCCCCGAGACGAT	WT_pmut_0_C	WT_pmut_0_C	id_uc002huj.1_1330_WT_pmut_0_C	id_uc002huj.1_1330_WT_pmut_0_C	id_uc002huj.1_1330
ATGGGGTTCGGTATGCGCGCCGCTGTAAAATTTACCACAAACTTAGTGACCTAACACAAATTTATTGCAATTCTGTAGGCTGGAAAAAGACAAGGCTCCCCGAGACGAT	WT_pmut_0_C	WT_pmut_0_C	id_uc011lkt.2_2768_WT_pmut_0_C	id_uc011lkt.2_2768_WT_pmut_0_C	id_uc011lkt.2_2768
ATGGGGTTCGGTATGCGCTCTTTGATGACATTCAAAGAAAGGTATATGAACTGATGCTACGAGATGAAAGATTTTATCCTTCCACAATGTTAAGGCTCCCCGAGACGAT	WT_pmut_0_C	WT_pmut_0_C	id_uc003stv.3_1688_WT_pmut_0_C	id_uc003stv.3_1688_WT_pmut_0_C	id_uc003stv.3_1688
ATGGGGTTCGGTATGCGCAGATGAGTTCATACTATGATTTAGAAAGTGGTCCAATTCCCCTGTTGGCATATGATTATTTTTACCCTGCCGCAAGGCTCCCCGAGACGAT	WT_pmut_0_C	WT_pmut_0_C	id_uc003cfa.1_1607_WT_pmut_0_C	id_uc003cfa.1_1607_WT_pmut_0_C	id_uc003cfa.1_1607
ATGGGGTTCGGTATGCGCACTACTGTGGCCAATGCGTTTTCTTCTTTATACTCTCAAGTCTCCGGGACGCCCCTGCAGAGAATAGGGAGATAAGGCTCCCCGAGACGAT	WT_pmut_0_C	WT_pmut_0_C	id_uc002uoi.3_1094_WT_pmut_0_C	id_uc002uoi.3_1094_WT_pmut_0_C	id_uc002uoi.3_1094
ATGGGGTTCGGTATGCGCTTCTTTTTCAGTTTTACCTCTTCTCTCTCAGTCCTACACTGATACACTTGAAGGACCATTTACTGTCTAATATAAGGCTCCCCGAGACGAT	WT_pmut_0_C	WT_pmut_0_C	id_uc003kqj.4_4295_WT_pmut_0_C	id_uc003kqj.4_4295_WT_pmut_0_C	id_uc003kqj.4_4295
ATGGGGTTCGGTATGCGCCCAGGCAGCCTTCCGGGAGCCATGGCTTCTTGCGGTTACTGACCCCAGGGCTGACCACCAGCCTCGGTTTCGCAAGGCTCCCCGAGACGAT	WT_pmut_0_C	WT_pmut_0_C	id_uc011lsj.1_469_WT_pmut_0_C	id_uc011lsj.1_469_WT_pmut_0_C	id_uc011lsj.1_469
ATGGGGTTCGGTATGCGCCAAATAACAGACCAGCTTCTTTTTCTTGCAGTCACAGATGTAATTTCCTTTTTGTTGTCAAACATTTGGGATAAAGGCTCCCCGAGACGAT	WT_pmut_0_C	WT_pmut_0_C	id_uc003ihu.1_4023_WT_pmut_0_C	id_uc003ihu.1_4023_WT_pmut_0_C	id_uc003ihu.1_4023
ATGGGGTTCGGTATGCGCCAGCTGTTACAGCCCTCAACAGTGAAAGTAACCTTGCCCGAGCATATGCACAGGGTATCAGCCGATCTGTTGTAAGGCTCCCCGAGACGAT	WT_pmut_0_C	WT_pmut_0_C	id_uc001skr.1_815_WT_pmut_0_C	id_uc001skr.1_815_WT_pmut_0_C	id_uc001skr.1_815
ATGGGGTTCGGTATGCGCCACTCTTGTAGCATGGACACTGCTAGCTGGGTCCAAATCCCAGCTCCAGCAGTTGCCAGCGCTGGACAACATTAAGGCTCCCCGAGACGAT	WT_pmut_0_C	WT_pmut_0_C	id_uc003zxl.3_4326_WT_pmut_0_C	id_uc003zxl.3_4326_WT_pmut_0_C	id_uc003zxl.3_4326
ATGGGGTTCGGTATGCGCCACTCTTGTAGCATGGACACTGCTAGCTGGGTCCAAATCCCAGCTCCAGCAGTTGCCAGCGCTGGGTCAAGTCAAGGCTCCCCGAGACGAT	WT_pmut_0_C	WT_pmut_0_C	id_uc003zxl.3_4326_WT_pmut_0_C	id_uc003zxl.3_4326_WT_pmut_0_C	id_uc003zxl.3_4326
ATGGGGTTCGGTATGCGCTAAGTAGAATTAATTCCTGTCACTCTCCTAGGCGTCATTCCACACATCCACAAATCTCTGATTGGGCCACTAAAAGGCTCCCCGAGACGAT	WT_pmut_0_C	WT_pmut_0_C	id_uc003hvn.1_1408_WT_pmut_0_C	id_uc003hvn.1_1408_WT_pmut_0_C	id_uc003hvn.1_1408
ATGGGGTTCGGTATGCGCAGAATTGTAGAAAATGACAAATCCAAAATTCTCACAACTATAGAAGACCTTGACCAGAAGAAAAATATTGGGGAAGGCTCCCCGAGACGAT	WT_pmut_0_C	WT_pmut_0_C	id_uc004bbw.3_3328_WT_pmut_0_C	id_uc004bbw.3_3328_WT_pmut_0_C	id_uc004bbw.3_3328
ATGGGGTTCGGTATGCGCCCATTGCCAGTTATTAAAGAGCCTAATCAATACGTTCAAACTATACTAAAACACCTACAGAATCTCCCATAAGAAGGCTCCCCGAGACGAT	WT_pmut_0_C	WT_pmut_0_C	id_uc002xiw.3_603_WT_pmut_0_C	id_uc002xiw.3_603_WT_pmut_0_C	id_uc002xiw.3_603
ATGGGGTTCGGTATGCGCGTGAGCACAAAAAAAATACCCACCGTGAATCGCATTACTCCCAAAACTCAGGGCACTAACCAAATCATCATAGAAGGCTCCCCGAGACGAT	WT_pmut_0_C	WT_pmut_0_C	id_uc002nkx.2_927_WT_pmut_0_C	id_uc002nkx.2_927_WT_pmut_0_C	id_uc002nkx.2_927
ATGGGGTTCGGTATGCGCCATCTCCTGCCTCCTAATAGCTTTGAGGGAGCCGAAGAAGAAGCTGTTCAAACGCCGGCGGGTGTCCAGGATCAAGGCTCCCCGAGACGAT	WT_pmut_0_C	WT_pmut_0_C	id_uc001nuf.3_760_WT_pmut_0_C	id_uc001nuf.3_760_WT_pmut_0_C	id_uc001nuf.3_760
ATGGGGTTCGGTATGCGCCTGGGTCAGGAGTCCCAAAGGTCAGTGACAGTCTCTCAGAAGAGGCCCAGCGTCCACCTCTCTCCATCGAATCAAGGCTCCCCGAGACGAT	WT_pmut_0_C	WT_pmut_0_C	id_uc004bxl.2_2533_WT_pmut_0_C	id_uc004bxl.2_2533_WT_pmut_0_C	id_uc004bxl.2_2533
ATGGGGTTCGGTATGCGCGTTTTGTTTGTGTTTTCTCCTTAGCTGCTTTACTCTCCCATTGAAAACATCCAAAGAGTAGCTGCCGTCAAAAAAGGCTCCCCGAGACGAT	WT_pmut_0_C	WT_pmut_0_C	id_uc003cks.3_2950_WT_pmut_0_C	id_uc003cks.3_2950_WT_pmut_0_C	id_uc003cks.3_2950
ATGGGGTTCGGTATGCGCTCCTCACCCTTGACAACAACGTGGTGAATGGTCCCAGCCCTGCCATCCGCACTAACTACATTGGCGAACTTATAAGGCTCCCCGAGACGAT	WT_pmut_0_C	WT_pmut_0_C	id_uc001zkh.3_928_WT_pmut_0_C	id_uc001zkh.3_928_WT_pmut_0_C	id_uc001zkh.3_928
ATGGGGTTCGGTATGCGCTCCTCACCCTTGACAACAACGTGGTGAATGGTCCCAGCCCTGCCATCCGCACTAACTACATTGGCGAAGAGATAAGGCTCCCCGAGACGAT	WT_pmut_0_C	WT_pmut_0_C	id_uc001zkh.3_928_WT_pmut_0_C	id_uc001zkh.3_928_WT_pmut_0_C	id_uc001zkh.3_928
ATGGGGTTCGGTATGCGCTGTTCCGGAAGTATCGGTTCCACTTCTTTTGTCCCATGCGCTGCAGGGCTTGGGTTTCCCTGGAGCTTGAGGGAAGGCTCCCCGAGACGAT	WT_pmut_0_C	WT_pmut_0_C	id_uc010laz.3_619_WT_pmut_0_C	id_uc010laz.3_619_WT_pmut_0_C	id_uc010laz.3_619
ATGGGGTTCGGTATGCGCAATTGGCCAGAGGAATAGAGAGTGACTTTTTTCATGAAGACATGGAGTCCTTGACGCAGATGCTTCTGACGGTAAGGCTCCCCGAGACGAT	WT_pmut_0_C	WT_pmut_0_C	id_uc003vgh.3_1387_WT_pmut_0_C	id_uc003vgh.3_1387_WT_pmut_0_C	id_uc003vgh.3_1387
ATGGGGTTCGGTATGCGCAGGTGGTGAGGGGATGCAAAGAACTACAGGGACTGCTGGAATTTCTGAGCTAAGAAACTGAAAGCATATAGTAAAGGCTCCCCGAGACGAT	WT_pmut_0_C	WT_pmut_0_C	id_uc002hbq.3_3655_WT_pmut_0_C	id_uc002hbq.3_3655_WT_pmut_0_C	id_uc002hbq.3_3655
ATGGGGTTCGGTATGCGCCGCCGTGGTGGAGCAGCAGCATTCCGTGGAGTCCGACTCTCCAGACTCAGGACTGCCCTCCTCTCGAACGTATAAGGCTCCCCGAGACGAT	WT_pmut_0_C	WT_pmut_0_C	id_uc002fum.4_2412_WT_pmut_0_C	id_uc002fum.4_2412_WT_pmut_0_C	id_uc002fum.4_2412
ATGGGGTTCGGTATGCGCCGCCGTGGTGGAGCAGCAGCATTCCGTGGAGTCCGACTCTCCAGACTCAGGACTGCCCTCCTCTCCATCATTTAAGGCTCCCCGAGACGAT	WT_pmut_0_C	WT_pmut_0_C	id_uc002fum.4_2412_WT_pmut_0_C	id_uc002fum.4_2412_WT_pmut_0_C	id_uc002fum.4_2412
ATGGGGTTCGGTATGCGCCGCTCAGCAGCAGCCTGAAAACTTGCTACAAGCATCTCAATCAGACCAGTCGCAGTTTCGCAGCTTATACGTCAAGGCTCCCCGAGACGAT	WT_pmut_0_C	WT_pmut_0_C	id_uc003wuh.3_477_WT_pmut_0_C	id_uc003wuh.3_477_WT_pmut_0_C	id_uc003wuh.3_477
ATGGGGTTCGGTATGCGCACTGCCGTGTTTGGACCATTGGCAAGCCTGGTCCCACTCCTCAGGGGCTCCTGGCAGTGAAGCAACGGTGGTAAAGGCTCCCCGAGACGAT	WT_pmut_0_C	WT_pmut_0_C	id_uc002rut.3_2694_WT_pmut_0_C	id_uc002rut.3_2694_WT_pmut_0_C	id_uc002rut.3_2694
ATGGGGTTCGGTATGCGCGACACCATGAATTGTACCACAGAGGCAGATGTCCTATCCAACATGGAAACCATGAACTGTACACACGAAATCTAAGGCTCCCCGAGACGAT	WT_pmut_0_C	WT_pmut_0_C	id_uc011egl.1_746_WT_pmut_0_C	id_uc011egl.1_746_WT_pmut_0_C	id_uc011egl.1_746
ATGGGGTTCGGTATGCGCCATCCTCTACTGCCATACCTTTCCCTGGGGGCCTGAACACAGAACAGGGAGATGGACAACCACTTAAGTATCCAAGGCTCCCCGAGACGAT	WT_pmut_0_C	WT_pmut_0_C	id_uc002ewn.2_2554_WT_pmut_0_C	id_uc002ewn.2_2554_WT_pmut_0_C	id_uc002ewn.2_2554
ATGGGGTTCGGTATGCGCCCGCTCCCCGCTCCTCCTCCCCAGCCATGGCGCTCACGTTCGCGGCCTTCTGCTACATGCTGGCGGAAAAAAAAAGGCTCCCCGAGACGAT	WT_pmut_0_C	WT_pmut_0_C	id_uc001xat.1_111_WT_pmut_0_C	id_uc001xat.1_111_WT_pmut_0_C	id_uc001xat.1_111
ATGGGGTTCGGTATGCGCCGCAGAAGGTGTTTTTGCGCTGGTTCAATGAACAGATGATGCAGAGGCCCCATTGGAGACACGTGGGGCGGGAAAGGCTCCCCGAGACGAT	WT_pmut_0_C	WT_pmut_0_C	id_uc002fuy.1_4213_WT_pmut_0_C	id_uc002fuy.1_4213_WT_pmut_0_C	id_uc002fuy.1_4213
ATGGGGTTCGGTATGCGCCCCTAATAGAGTCATTGTTAAACACTCTGGGTCCGAACCCCAGAACTTGATTCTTTCCTTGTTCTTAATGCTGAAGGCTCCCCGAGACGAT	WT_pmut_0_C	WT_pmut_0_C	id_uc002mdp.2_976_WT_pmut_0_C	id_uc002mdp.2_976_WT_pmut_0_C	id_uc002mdp.2_976
ATGGGGTTCGGTATGCGCTCTGATGTCTGGCCCTGGGGAATGGCACCAGTCCCAGCCTGGGAATCAACCCAGTTCCTGAGTGCTAACGCCAAAGGCTCCCCGAGACGAT	WT_pmut_0_C	WT_pmut_0_C	id_uc004bny.1_3214_WT_pmut_0_C	id_uc004bny.1_3214_WT_pmut_0_C	id_uc004bny.1_3214
ATGGGGTTCGGTATGCGCGGGAGTGGTTGTGTGATCGCCATCTTAGGGAACGTTCTCGTCCGTGGCGCACCTGGCGCGGGCGAACAAATTAAAGGCTCCCCGAGACGAT	WT_pmut_0_C	WT_pmut_0_C	id_uc001tfp.3_119_WT_pmut_0_C	id_uc001tfq.3_119_WT_pmut_0_C	id_uc001tfq.3_119
ATGGGGTTCGGTATGCGCGGGAGTGGTTGTGTGATCGCCATCTTAGGGAACGTTCTCGTCCGTGGCGCACCTGGCGCGGGCGAATTACACAAAGGCTCCCCGAGACGAT	WT_pmut_0_C	WT_pmut_0_C	id_uc001tfp.3_119_WT_pmut_0_C	id_uc001tfp.3_119_WT_pmut_0_C	id_uc001tfp.3_119
ATGGGGTTCGGTATGCGCCTCTCTCCCTACACGATAGAATTTTTGCGGCACTTGAAGAGCTTTTTCCAGATTATGTTTAAAATACCAAGTAAAGGCTCCCCGAGACGAT	WT_pmut_0_C	WT_pmut_0_C	id_uc003zis.2_1249_WT_pmut_0_C	id_uc003zis.2_1249_WT_pmut_0_C	id_uc003zis.2_1249
ATGGGGTTCGGTATGCGCGTGGCGGTGGCCGACGACTTCTGCAAAGTGCACCTCTTCCAGTACCCGTGCGCTCGTGCCAAGGCTTATAAAAAAGGCTCCCCGAGACGAT	WT_pmut_0_C	WT_pmut_0_C	id_uc001ntu.1_2766_WT_pmut_0_C	id_uc001ntu.1_2766_WT_pmut_0_C	id_uc001ntu.1_2766
ATGGGGTTCGGTATGCGCAGATCCCTTACACATTTGAGGACCGAATCAACCTTGCCGTGTTCCCATCCCTGCAGGGGGGCCCCCTTCTCCCAAGGCTCCCCGAGACGAT	WT_pmut_0_C	WT_pmut_0_C	id_uc001snf.2_1156_WT_pmut_0_C	id_uc001snf.2_1156_WT_pmut_0_C	id_uc001snf.2_1156
ATGGGGTTCGGTATGCGCACAAGAAGAAGATTAAGACAGAGAGCGGCCGCCACATCAGCAGCTCCTACAAGCGAGACCTCTATATGCCGTGAAGGCTCCCCGAGACGAT	WT_pmut_0_C	WT_pmut_0_C	id_uc001tuq.4_2301_WT_pmut_0_C	id_uc001tuq.4_2301_WT_pmut_0_C	id_uc001tuq.4_2301
ATGGGGTTCGGTATGCGCGCACTCTGGACTTTGAATCCAGCAATCCGAGTCCGAATCTCGGTGGGACCTTTCAAAGGTGAACGTTGAAAGCAAGGCTCCCCGAGACGAT	WT_pmut_0_C	WT_pmut_0_C	id_uc003nlp.1_560_WT_pmut_0_C	id_uc003nlp.1_560_WT_pmut_0_C	id_uc003nlp.1_560
ATGGGGTTCGGTATGCGCAGAGCTGTTTCTGAACTAGAACTTTTAGGATTCATAAAACCTACCAAACAGAAGACTGACCATGTAGGCTCTTAAGGCTCCCCGAGACGAT	WT_pmut_0_C	WT_pmut_0_C	id_uc003pmg.3_2182_WT_pmut_0_C	id_uc003pmg.3_2182_WT_pmut_0_C	id_uc003pmg.3_2182
ATGGGGTTCGGTATGCGCACATACGTTCAATGGCCGCAGTATCCTGACTGCGCAAAGGTAGCATAATCACTTGTTCCTTAAATTGGTTCGTAAGGCTCCCCGAGACGAT	WT_pmut_0_C	WT_pmut_0_C	id_uc022bxr.1_472_WT_pmut_0_C	id_uc022bxr.1_472_WT_pmut_0_C	id_uc022bxr.1_472
ATGGGGTTCGGTATGCGCACATGCGTTTAACGGCCGCGGTACCCTAACTGCGCAAAGGTAGCATAATCACTTGTTCCTTAAATCTCAATCAAAGGCTCCCCGAGACGAT	WT_pmut_0_C	WT_pmut_0_C	id_uc001miq.3_905_WT_pmut_0_C	id_uc001miq.3_905_WT_pmut_0_C	id_uc001miq.3_905
ATGGGGTTCGGTATGCGCCCGCGCACTTCGTCATGTTCTTCGCGCCCTGGCGTGGACACTGCCAGCGGCTGCAGCCGACTTGGGGTGGTTTAAGGCTCCCCGAGACGAT	WT_pmut_0_C	WT_pmut_0_C	id_uc003mxv.3_304_WT_pmut_0_C	id_uc003mxv.3_304_WT_pmut_0_C	id_uc003mxv.3_304
ATGGGGTTCGGTATGCGCTAAATTCAAAACTGATCCTTTTAGTTCCTCATCATATGATATGAAGGGATTAACTGTAGCAGGATCCGCTAAAAAGGCTCCCCGAGACGAT	WT_pmut_0_C	WT_pmut_0_C	id_uc021wjh.1_631_WT_pmut_0_C	id_uc021wjh.1_631_WT_pmut_0_C	id_uc021wjh.1_631
ATGGGGTTCGGTATGCGCCCCTCTGGGCCTGGGATATTGTGGTTGATAACCGTGCCATCTGCAGGAACCACATTATGGATCTTTTCGTCCAAAGGCTCCCCGAGACGAT	WT_pmut_0_C	WT_pmut_0_C	id_uc011aoy.1_1958_WT_pmut_0_C	id_uc011aoy.1_1958_WT_pmut_0_C	id_uc011aoy.1_1958
ATGGGGTTCGGTATGCGCCCTCAGCTGGGGGAAAGGCAGTTCTGGTGCTGCAGAGGCCCTGGTGCAGAAAGTGGGACGTCTTTCTTAGGCCAAGGCTCCCCGAGACGAT	WT_pmut_0_C	WT_pmut_0_C	id_uc002hay.3_1770_WT_pmut_0_C	id_uc002hay.3_1770_WT_pmut_0_C	id_uc002hay.3_1770
ATGGGGTTCGGTATGCGCTGGAAGAGGAAGAGATTCAAATGAACGACAGTCCAAACCTGAGTTGTGAACAGGAGAAACCAATGCGACTTCTAAGGCTCCCCGAGACGAT	WT_pmut_0_C	WT_pmut_0_C	id_uc003pum.3_731_WT_pmut_0_C	id_uc003pum.3_731_WT_pmut_0_C	id_uc003pum.3_731
ATGGGGTTCGGTATGCGCGAAAGAAATTGATAAGCAAAGTAGCTTGTATACTCTCATCAGCACTCAGGAATCCTCTGCAGGCACTTTATAGAAGGCTCCCCGAGACGAT	WT_pmut_0_C	WT_pmut_0_C	id_uc004dtq.3_1643_WT_pmut_0_C	id_uc004dtq.3_1643_WT_pmut_0_C	id_uc004dtq.3_1643
ATGGGGTTCGGTATGCGCGCCACCGCATCCACCGGTCACTCGCCAGCCAGCTCAAGTACGCCCTGGTGTGGGGCACCAGCACCGAGAATACAAGGCTCCCCGAGACGAT	WT_pmut_0_C	WT_pmut_0_C	id_uc002gsh.1_1044_WT_pmut_0_C	id_uc002gsh.1_1044_WT_pmut_0_C	id_uc002gsh.1_1044
ATGGGGTTCGGTATGCGCTGGAGCCCTTCCACGCCCAGGTGGGCTCCCTGCACATCGTCCTCGGGGAGCTCCAGCATCAGCAGTAGTGTGTAAGGCTCCCCGAGACGAT	WT_pmut_0_C	WT_pmut_0_C	id_uc002jqg.4_519_WT_pmut_0_C	id_uc002jqg.4_519_WT_pmut_0_C	id_uc002jqg.4_519
ATGGGGTTCGGTATGCGCAGCTGCTGATGAAGGAGAGAGAAGTGCAGAGTCCGATTCTGTACAAGGGGGCAGCGGCAGAAGGCATGGTTCAAAGGCTCCCCGAGACGAT	WT_pmut_0_C	WT_pmut_0_C	id_uc002htw.3_1705_WT_pmut_0_C	id_uc002htw.3_1705_WT_pmut_0_C	id_uc002htw.3_1705
ATGGGGTTCGGTATGCGCCCCCCAAGGCCCGAGAGGTGCTGCATACCACGCACCAGAGCCAGGAGCGTGGCACACACAGCCTGGTTCATGAAAGGCTCCCCGAGACGAT	WT_pmut_0_C	WT_pmut_0_C	id_uc002kfg.4_1465_WT_pmut_0_C	id_uc002kfg.4_1465_WT_pmut_0_C	id_uc002kfg.4_1465
ATGGGGTTCGGTATGCGCATGGGTACTGGGGAGGGAGCCGCGGTGTGTGTCCTACTCACTAGGCCTCGTTGCCACCTCTGCACCAAACCACAAGGCTCCCCGAGACGAT	WT_pmut_0_C	WT_pmut_0_C	id_uc010gsg.2_1290_WT_pmut_0_C	id_uc010gsg.2_1290_WT_pmut_0_C	id_uc010gsg.2_1290
ATGGGGTTCGGTATGCGCAGTTCAGAGAGCGGTACCTTTCCTACTGTCTTCTCTTTGACTCCATGGAGGAATTTGTAACGATCGGCAAGCTAAGGCTCCCCGAGACGAT	WT_pmut_0_C	WT_pmut_0_C	id_uc002fjd.3_1825_WT_pmut_0_C	id_uc002fjd.3_1825_WT_pmut_0_C	id_uc002fjd.3_1825
ATGGGGTTCGGTATGCGCTTTAAACAATGTGTCTTTGTTTTTTTAGCCCCCTCCAAATGACAAAACCTTACTCTACAATCCATACGCGGTGAAGGCTCCCCGAGACGAT	WT_pmut_0_C	WT_pmut_0_C	id_uc002ewr.2_3483_WT_pmut_0_C	id_uc002ewr.2_3483_WT_pmut_0_C	id_uc002ewr.2_3483
ATGGGGTTCGGTATGCGCAGGCTGAGATCGTCAAAAGGCTGAACGGGATTCGTGCCCAGGTCCTGCCCTACCTCTCCCAAGAGGGGGAGGCAAGGCTCCCCGAGACGAT	WT_pmut_0_C	WT_pmut_0_C	id_uc002lxb.1_506_WT_pmut_0_C	id_uc002lxb.1_506_WT_pmut_0_C	id_uc002lxb.1_506
ATGGGGTTCGGTATGCGCTTGCCGTCTCTGTTCTTATGTTTATAATCAGTCCAATGCTGGTTTATGGAGCAATTTCTTATCAACGCATTGTAAGGCTCCCCGAGACGAT	WT_pmut_0_C	WT_pmut_0_C	id_uc002rdm.3_792_WT_pmut_0_C	id_uc002rdm.3_792_WT_pmut_0_C	id_uc002rdm.3_792
ATGGGGTTCGGTATGCGCTTGCCGTCTCTGTTCTTATGTTTATAATCAGTCCAATGCTGGTTTATGGAGCAATTTCTTATCAACTTCCAAGAAGGCTCCCCGAGACGAT	WT_pmut_0_C	WT_pmut_0_C	id_uc002rdm.3_792_WT_pmut_0_C	id_uc002rdm.3_792_WT_pmut_0_C	id_uc002rdm.3_792
ATGGGGTTCGGTATGCGCAGCCAGTTGTGTTCAGACACACACATCACAGCCTGACTCACTAACTGAGGCCTTTCCATAGCTCCATTTCGGAAAGGCTCCCCGAGACGAT	WT_pmut_0_C	WT_pmut_0_C	id_uc003zvb.3_1047_WT_pmut_0_C	id_uc003zvb.3_1047_WT_pmut_0_C	id_uc003zvb.3_1047
ATGGGGTTCGGTATGCGCACGGCAGCGGCGGTGGCCGCGGCTGCTGCTGCCGCTACTGCCACCGCTGCCACGGCTGCTGGCCCAGACGAATAAGGCTCCCCGAGACGAT	WT_pmut_0_C	WT_pmut_0_C	id_uc004dtg.3_536_WT_pmut_0_C	id_uc004dtg.3_536_WT_pmut_0_C	id_uc004dtg.3_536
ATGGGGTTCGGTATGCGCACGTGCTCATCTTTGACCTGGGCGGGGGCACCCTCGACGTGTCCATCCTGACGATCGACGACGGCTGAGTAGTAAGGCTCCCCGAGACGAT	WT_pmut_0_C	WT_pmut_0_C	id_uc003nxi.1_333_WT_pmut_0_C	id_uc003nxi.1_333_WT_pmut_0_C	id_uc003nxi.1_333
ATGGGGTTCGGTATGCGCGCTTTTGCTGATAAAGGACCTCCCCCAGGGCACTATGATATCAACGAATCCCTTGTGAAGCAGTCCTCAGTATAAGGCTCCCCGAGACGAT	WT_pmut_0_C	WT_pmut_0_C	id_uc001bjc.3_744_WT_pmut_0_C	id_uc001bjc.3_744_WT_pmut_0_C	id_uc001bjc.3_744
ATGGGGTTCGGTATGCGCGCCCTGGAAGTTGTTCCTACGCAAGGAGGTGTCCTACCCACGGGAGAACTTCAGCCATCCCTACTTAAGGCCGAAGGCTCCCCGAGACGAT	WT_pmut_0_C	WT_pmut_0_C	id_uc002jor.1_2254_WT_pmut_0_C	id_uc002jor.1_2254_WT_pmut_0_C	id_uc002jor.1_2254
ATGGGGTTCGGTATGCGCGACCGAGACCTCATGACACTTCCTATTCAGAACAAGCTGGCACCATTCATCGCCAAACGCCGAACAAGAGTAAAAGGCTCCCCGAGACGAT	WT_pmut_0_C	WT_pmut_0_C	id_uc002lgp.4_451_WT_pmut_0_C	id_uc002lgp.4_451_WT_pmut_0_C	id_uc002lgp.4_451
ATGGGGTTCGGTATGCGCACGCCAGCCTCCCGCATCCAGCCGGCTGGCAACACTTCTCCCAGAGCGATCTCGCGGGTCGACCGGATGCCTCAAGGCTCCCCGAGACGAT	WT_pmut_0_C	WT_pmut_0_C	id_uc003avk.3_1195_WT_pmut_0_C	id_uc003avk.3_1195_WT_pmut_0_C	id_uc003avk.3_1195
ATGGGGTTCGGTATGCGCAGTTTTGACAGCTGCCAGTCTTCCTGCCCCTTCCACACTGCAGCTGAAGTTCATTACCTGAAGGACCATATATAAGGCTCCCCGAGACGAT	WT_pmut_0_C	WT_pmut_0_C	id_uc003spp.3_2446_WT_pmut_0_C	id_uc003spp.3_2446_WT_pmut_0_C	id_uc003spp.3_2446
ATGGGGTTCGGTATGCGCTGTACCGCGGCCTTAGCTCCCTGCTCTACGGTCCCATCCCCAAGGCGGCCGTCAGGTTTGGAATGCAACGCAGAAGGCTCCCCGAGACGAT	WT_pmut_0_C	WT_pmut_0_C	id_uc002zoz.3_396_WT_pmut_0_C	id_uc002zoz.3_396_WT_pmut_0_C	id_uc002zoz.3_396
ATGGGGTTCGGTATGCGCTGTACCGCGGCCTTAGCTCCCTGCTCTACGGTCCCATCCCCAAGGCGGCCGTCAGGTTTGGAATGCATATGCGAAGGCTCCCCGAGACGAT	WT_pmut_0_C	WT_pmut_0_C	id_uc002zoz.3_396_WT_pmut_0_C	id_uc021wlb.1_307_WT_pmut_0_C	id_uc021wlb.1_307
ATGGGGTTCGGTATGCGCCTTTGCCTCTACCTTCCGGCTGCTCACAGTGTCTGCTTATGGGACATACGCTGACTACTTAGCTGTCCCAGAGAAGGCTCCCCGAGACGAT	WT_pmut_0_C	WT_pmut_0_C	id_uc001qqh.3_392_WT_pmut_0_C	id_uc001qqh.3_392_WT_pmut_0_C	id_uc001qqh.3_392
ATGGGGTTCGGTATGCGCCTTTGCCTCTACCTTCCGGCTGCTCACAGTGTCTGCTTATGGGACATACGCTGACTACTTAGCTGTCAACAGCAAGGCTCCCCGAGACGAT	WT_pmut_0_C	WT_pmut_0_C	id_uc001qqh.3_392_WT_pmut_0_C	id_uc001qqh.3_392_WT_pmut_0_C	id_uc001qqh.3_392
ATGGGGTTCGGTATGCGCTGGGGGAGCGGATCTGGGTGGACAGCCCTCACCGTAAGACGTTTGTGGACAACATCCAGACGGCCAGGATGAAAAGGCTCCCCGAGACGAT	WT_pmut_0_C	WT_pmut_0_C	id_uc003skn.2_838_WT_pmut_0_C	id_uc003skn.2_838_WT_pmut_0_C	id_uc003skn.2_838
ATGGGGTTCGGTATGCGCGCTGGGGAGCTGTGAGAGTGTGAGGGGCACGTCCCAGCCGTCTGGACTCTTTCTCTCCTACTGAGTCATCCGGAAGGCTCCCCGAGACGAT	WT_pmut_0_C	WT_pmut_0_C	id_uc004dql.3_204_WT_pmut_0_C	id_uc004dql.3_204_WT_pmut_0_C	id_uc004dql.3_204
ATGGGGTTCGGTATGCGCATGCCACGCCTTATGAAGCACTGTTTCACAGTCACTTTCACTTCCCGAATAAAGGTTACCAGGTACTGGCCGAAAGGCTCCCCGAGACGAT	WT_pmut_0_C	WT_pmut_0_C	id_uc003sqe.4_2816_WT_pmut_0_C	id_uc003sqe.4_2816_WT_pmut_0_C	id_uc003sqe.4_2816
ATGGGGTTCGGTATGCGCAAATCACTGAGGCATTTTTACTACTATTCTGTCAAAATCAGGATTTTAGTGCTTGCCACCACCAGATACCTCTAAGGCTCCCCGAGACGAT	WT_pmut_0_C	WT_pmut_0_C	id_uc002uui.3_2180_WT_pmut_0_C	id_uc002uui.3_2180_WT_pmut_0_C	id_uc002uui.3_2180
ATGGGGTTCGGTATGCGCGAAGGAGGTGCCACAAAGGGCAAAGAGATTGACTTTGATGATGTGGCTGCAATAAACCCAGAACTCCAATGGTAAGGCTCCCCGAGACGAT	WT_pmut_0_C	WT_pmut_0_C	id_uc001cmg.4_287_WT_pmut_0_C	id_uc001cmg.4_287_WT_pmut_0_C	id_uc001cmg.4_287
ATGGGGTTCGGTATGCGCGATGCTCGACATGCAGCAGAAGGAGAAATATACACCAAACTGAATCAAAAAATTGATGAATTTGTGATACTTCAAGGCTCCCCGAGACGAT	WT_pmut_0_C	WT_pmut_0_C	id_uc001kig.3_1873_WT_pmut_0_C	id_uc001kig.3_1873_WT_pmut_0_C	id_uc001kig.3_1873
ATGGGGTTCGGTATGCGCAGAAGAAGCTTTCTTGGCTTGGAAAGAAGATACAACCCAAGAGTTTCCGGGAAAAGGCAAGGCTTCCTGTACCAAGGCTCCCCGAGACGAT	WT_pmut_0_C	WT_pmut_0_C	id_uc001mjc.3_3036_WT_pmut_0_C	id_uc001mjc.3_3036_WT_pmut_0_C	id_uc001mjc.3_3036
ATGGGGTTCGGTATGCGCCTTTTTGGAGACAGATTCGCAGTGGTCGCTTCCTCTCCTTGACGGAGTCGGTTTGTCACTCAGGCGGCGAATGAAGGCTCCCCGAGACGAT	WT_pmut_0_C	WT_pmut_0_C	id_uc001bqd.3_135_WT_pmut_0_C	id_uc001bqd.3_135_WT_pmut_0_C	id_uc001bqd.3_135
ATGGGGTTCGGTATGCGCAGAAATCTCTTTCCAAGAAAAGGGAAGAATCTCACCTCTCGAATTCCCAAACACCCGAAAGACACCACAGACTAAGGCTCCCCGAGACGAT	WT_pmut_0_C	WT_pmut_0_C	id_uc003znk.3_2808_WT_pmut_0_C	id_uc003znk.3_2808_WT_pmut_0_C	id_uc003znk.3_2808
ATGGGGTTCGGTATGCGCGTGGCCGAGTGGTTAAGGCGATGGACTAGAAACCCATTGGGGTCTCCCCGCGCAGGTTCGAATCCGCAACATTAAGGCTCCCCGAGACGAT	WT_pmut_0_C	WT_pmut_0_C	id_uc002gkq.4_5241_WT_pmut_0_C	id_uc002gkq.4_5241_WT_pmut_0_C	id_uc002gkq.4_5241
ATGGGGTTCGGTATGCGCAGGGGAAGGCAGGCAGCGGACTCCGCCAATATCATCTGTCCAAGATTGAAGAACTCCAGCTGATTGCATTCAGAAGGCTCCCCGAGACGAT	WT_pmut_0_C	WT_pmut_0_C	id_uc002jcb.3_152_WT_pmut_0_C	id_uc002jcb.3_152_WT_pmut_0_C	id_uc002jcb.3_152
ATGGGGTTCGGTATGCGCTCAGTTTATGGAAGGATATAACTTCCGTAAGTCACATCCTTATGGAAGCTACTGAATAAAAGAAGGTCTAGCAAAGGCTCCCCGAGACGAT	WT_pmut_0_C	WT_pmut_0_C	id_uc022ayx.1_888_WT_pmut_0_C	id_uc022ayx.1_888_WT_pmut_0_C	id_uc022ayx.1_888
ATGGGGTTCGGTATGCGCTCCTCTTTCCCTAAGCAGCCTGAGGTGATCTGCGAAAATGGTTCGCTATTCACTTGACCCGGAGACAGACCGTAAGGCTCCCCGAGACGAT	WT_pmut_0_C	WT_pmut_0_C	id_uc002ldq.3_118_WT_pmut_0_C	id_uc002ldq.3_118_WT_pmut_0_C	id_uc002ldq.3_118
ATGGGGTTCGGTATGCGCGCAGAGAAGGAGGCCAAACAGAAAGAGCTCAGCGAGAAACAGCTAAGCCAAGCCACTGCTGCTGCAGTTACAGAAGGCTCCCCGAGACGAT	WT_pmut_0_C	WT_pmut_0_C	id_uc002fer.3_361_WT_pmut_0_C	id_uc002fer.3_361_WT_pmut_0_C	id_uc002fer.3_361
ATGGGGTTCGGTATGCGCGCTGCTAGGAGAAAGGGAAGATGTTGTTCATGCGCACAAATATAATCCTACAGAAAAGGCAGAATTCTTCCGCAAGGCTCCCCGAGACGAT	WT_pmut_0_C	WT_pmut_0_C	id_uc003knt.3_1594_WT_pmut_0_C	id_uc003knt.3_1594_WT_pmut_0_C	id_uc003knt.3_1594
ATGGGGTTCGGTATGCGCAAATATGTCAAAGTACCAGAGCAACCCAAAGGCTATGAATCTCATCAGTAAATTGTCAGCCAAATTTGCTTATAAGGCTCCCCGAGACGAT	WT_pmut_0_C	WT_pmut_0_C	id_uc001vej.3_1121_WT_pmut_0_C	id_uc001vej.3_1121_WT_pmut_0_C	id_uc001vej.3_1121
ATGGGGTTCGGTATGCGCTTGTGACAAATGCCCGGAGTCCTGGAGCTCGCCGTTACGGTTTTGTCACGATGTCCACAGCAGAACAGCGGGGAAGGCTCCCCGAGACGAT	WT_pmut_0_C	WT_pmut_0_C	id_uc002mce.4_1514_WT_pmut_0_C	id_uc002mce.4_1514_WT_pmut_0_C	id_uc002mce.4_1514
ATGGGGTTCGGTATGCGCAGAGTTGGGCTCTGGGACTAGGACATTGGGGTCCGAATCCCAGCTCTGCTGCTGAACCGTGGGCATGTATATAAAGGCTCCCCGAGACGAT	WT_pmut_0_C	WT_pmut_0_C	id_uc003are.2_2186_WT_pmut_0_C	id_uc003are.2_2186_WT_pmut_0_C	id_uc003are.2_2186
ATGGGGTTCGGTATGCGCAAGTGCGAGGAGTGTGGGCTGCTGCTCTCCTCCGAGGGCGAGTGTCAGGGCTGCTACCCGCTGGAGGATCGTCAAGGCTCCCCGAGACGAT	WT_pmut_0_C	WT_pmut_0_C	id_uc003uww.3_1494_WT_pmut_0_C	id_uc003uww.3_1494_WT_pmut_0_C	id_uc003uww.3_1494
ATGGGGTTCGGTATGCGCGCGATCTCTGCGGGAAAGCTTTCAGCGCGAGTCCAAACCTCACCGCACACAGGAAGATACACACGTTTTCGAAAAGGCTCCCCGAGACGAT	WT_pmut_0_C	WT_pmut_0_C	id_uc002mku.3_1681_WT_pmut_0_C	id_uc002mku.3_1681_WT_pmut_0_C	id_uc002mku.3_1681
ATGGGGTTCGGTATGCGCGCGATCTCTGCGGGAAAGCTTTCAGCGCGAGTCCAAACCTCACCGCACACAGGAAGATACACACGCTAAGTGGAAGGCTCCCCGAGACGAT	WT_pmut_0_C	WT_pmut_0_C	id_uc002mku.3_1681_WT_pmut_0_C	id_uc002mku.3_1681_WT_pmut_0_C	id_uc002mku.3_1681
ATGGGGTTCGGTATGCGCCCCCAAGAGTGGCCGTTCCTACCACGAGGAGTCCAACCCTCCAAAAGAGCCCATGAAAGATGACACCTAGGCCAAGGCTCCCCGAGACGAT	WT_pmut_0_C	WT_pmut_0_C	id_uc001bwo.2_551_WT_pmut_0_C	id_uc001bwo.2_551_WT_pmut_0_C	id_uc001bwo.2_551
ATGGGGTTCGGTATGCGCCCCCAAGAGTGGCCGTTCCTACCACGAGGAGTCCAACCCTCCAAAAGAGCCCATGAAAGATGACACTAGCATAAAGGCTCCCCGAGACGAT	WT_pmut_0_C	WT_pmut_0_C	id_uc001bwo.2_551_WT_pmut_0_C	id_uc001bwp.2_551_WT_pmut_0_C	id_uc001bwp.2_551
ATGGGGTTCGGTATGCGCGCCACCGTGTGTGTCCCGAGTAACCGTGCCGTCGTCGTGTGATGCCATAAGCGTCTGTGCGTGGAGGATGTCTAAGGCTCCCCGAGACGAT	WT_pmut_0_C	WT_pmut_0_C	id_uc002pft.1_828_WT_pmut_0_C	id_uc002pft.1_828_WT_pmut_0_C	id_uc002pft.1_828
ATGGGGTTCGGTATGCGCAGACAGAATTTGAAATCAAGTCCTGCTTCATTCACAAGAATTTTGGTGGGCATCTAATCCTACATCCACACGAAAGGCTCCCCGAGACGAT	WT_pmut_0_C	WT_pmut_0_C	id_uc003dna.4_1663_WT_pmut_0_C	id_uc003dna.4_1663_WT_pmut_0_C	id_uc003dna.4_1663
ATGGGGTTCGGTATGCGCGACTGTTTGCAACTTTACAGATGGTGCATTGGCTCAGCATCAGGAGTGGGATGGGAAGGAAAGCATTAATTAAAAGGCTCCCCGAGACGAT	WT_pmut_0_C	WT_pmut_0_C	id_uc003wlb.3_667_WT_pmut_0_C	id_uc003wlb.3_667_WT_pmut_0_C	id_uc003wlb.3_667
ATGGGGTTCGGTATGCGCAGGCTGTCACATGCAGCTGAGAAAAGGTATGTCCAAGTCATAAGTAGGTAATTGATAGGGTATGATTCTTCGAAAGGCTCCCCGAGACGAT	WT_pmut_0_C	WT_pmut_0_C	id_uc003fup.3_3094_WT_pmut_0_C	id_uc003fup.3_3094_WT_pmut_0_C	id_uc003fup.3_3094
ATGGGGTTCGGTATGCGCTGGGCTTTGGTATTGACTGAGTGGCTGACAGTCATCTTCCAACCCCAACTGGCTTGGGGGCAGGATTCCTCTAAAGGCTCCCCGAGACGAT	WT_pmut_0_C	WT_pmut_0_C	id_uc001jux.3_4273_WT_pmut_0_C	id_uc001jux.3_4273_WT_pmut_0_C	id_uc001jux.3_4273
ATGGGGTTCGGTATGCGCAGGCTTTGCTCTTTCATACTGGTGGTCTGGGTCCAATTCCCTGCCTATGAAGTAAGTTGCGTTTAGCCCGATGAAGGCTCCCCGAGACGAT	WT_pmut_0_C	WT_pmut_0_C	id_uc003hap.3_1822_WT_pmut_0_C	id_uc003hap.3_1822_WT_pmut_0_C	id_uc003hap.3_1822
ATGGGGTTCGGTATGCGCGTTGCTTACCTTTTAAACTATTCTTTTAGCCGCACTCTGACAGCTGTGCACGATGCCATCCTTGATGCCTGACAAGGCTCCCCGAGACGAT	WT_pmut_0_C	WT_pmut_0_C	id_uc002qxy.3_2324_WT_pmut_0_C	id_uc002qxy.3_2324_WT_pmut_0_C	id_uc002qxy.3_2324
ATGGGGTTCGGTATGCGCGTCAGCAGGGCTGGACTGAGGCCCAGCCCAGTCCCATGCTGGAACCCCTGGCCCTGCACCCACCATACGTACTAAGGCTCCCCGAGACGAT	WT_pmut_0_C	WT_pmut_0_C	id_uc004aag.1_2290_WT_pmut_0_C	id_uc004aag.1_2290_WT_pmut_0_C	id_uc004aag.1_2290
ATGGGGTTCGGTATGCGCCGCAGCATTTGCAAAGTTTGAAATAACTTTGTCTCTCTCAGCCTATTATCCATCTGTACCATTACGAATCACAAAGGCTCCCCGAGACGAT	WT_pmut_0_C	WT_pmut_0_C	id_uc010bbt.1_6932_WT_pmut_0_C	id_uc010bbt.1_6932_WT_pmut_0_C	id_uc010bbt.1_6932
ATGGGGTTCGGTATGCGCGAAAAGCCCTCTTCGGGATCATGAGACTTGGTCCTAGTCCAATTTCTGCCACTGAGGATGAATGTACCCTCTCAAGGCTCCCCGAGACGAT	WT_pmut_0_C	WT_pmut_0_C	id_uc003krc.3_2290_WT_pmut_0_C	id_uc003krc.3_2290_WT_pmut_0_C	id_uc003krc.3_2290
ATGGGGTTCGGTATGCGCTGTTCTCGGTTTGCAGGAACCCTGGGTGCAGGCTCGCAGCCCTGTCAACCAGCTCCGAGCCGGCAGCGGTAGTAAGGCTCCCCGAGACGAT	WT_pmut_0_C	WT_pmut_0_C	id_uc003qsw.4_190_WT_pmut_0_C	id_uc003qsw.4_190_WT_pmut_0_C	id_uc003qsw.4_190
ATGGGGTTCGGTATGCGCGGACAAGTGGCGGGCCCTGCACTCATGAGGGCCTCCAATGTGCTGCCCCCCTCTTAATACTCACCCAATGGACAAGGCTCCCCGAGACGAT	WT_pmut_0_C	WT_pmut_0_C	id_uc004fkm.2_839_WT_pmut_0_C	id_uc004fkm.2_839_WT_pmut_0_C	id_uc004fkm.2_839
ATGGGGTTCGGTATGCGCAGAAAATCCACAGATACGTGGACCTGCGCAGTCCAAACCTGTGTTGTTTGGGTCAACTGTATTGTAGCACGATAAGGCTCCCCGAGACGAT	WT_pmut_0_C	WT_pmut_0_C	id_uc003zki.3_2257_WT_pmut_0_C	id_uc003zki.3_2257_WT_pmut_0_C	id_uc003zki.3_2257
ATGGGGTTCGGTATGCGCCCCTGAAAATCATATGGGCTTGGATTTGGATACTCTCAACAGAAAGGGTTAAAGGCTGATGGTACGTAACGCTAAGGCTCCCCGAGACGAT	WT_pmut_0_C	WT_pmut_0_C	id_uc001vwv.3_109_WT_pmut_0_C	id_uc001vwv.3_109_WT_pmut_0_C	id_uc001vwv.3_109
ATGGGGTTCGGTATGCGCGGGAGAGGTGGAGGCCCTGCTGGATCGATACTCCGAGGCTGATCCTCCAGGGCAGGTGGCTGCCTTTCGGTCTAAGGCTCCCCGAGACGAT	WT_pmut_0_C	WT_pmut_0_C	id_uc003ouo.3_491_WT_pmut_0_C	id_uc003ouo.3_491_WT_pmut_0_C	id_uc003ouo.3_491
ATGGGGTTCGGTATGCGCAAGTGATGGATCTTGTACTCCGTGTTGCAGATCACTATTTTTTTACACCATACGTGTATCCAGCCGTCCCACAAAGGCTCCCCGAGACGAT	WT_pmut_0_C	WT_pmut_0_C	id_uc001pxu.3_177_WT_pmut_0_C	id_uc001pxu.3_177_WT_pmut_0_C	id_uc001pxu.3_177
ATGGGGTTCGGTATGCGCGCGGCCAGAAAAAGGCGCTGGAAAAAGTGAATCTCGTAACCAGAAGCCGAAGCCGGAGAACCAAGAGGGTTCTAAGGCTCCCCGAGACGAT	WT_pmut_0_C	WT_pmut_0_C	id_uc001sxt.3_95_WT_pmut_0_C	id_uc001sxt.3_95_WT_pmut_0_C	id_uc001sxt.3_95
ATGGGGTTCGGTATGCGCCATTGAGAAGCATTCGGAGTGTATTTAGCCTGCAGATGTTGTGATATGCAAATATCCCATTCCCTGATGAACGAAGGCTCCCCGAGACGAT	WT_pmut_0_C	WT_pmut_0_C	id_uc003eqi.3_766_WT_pmut_0_C	id_uc003eqi.3_766_WT_pmut_0_C	id_uc003eqi.3_766
ATGGGGTTCGGTATGCGCTGTCCTCCGCTGTGGCAAGAAGAAGGTCTGGTCAGACCCCAATGAGACCAATGAAATCGCCAATGCATATTGAAAGGCTCCCCGAGACGAT	WT_pmut_0_C	WT_pmut_0_C	id_uc002hrq.1_134_WT_pmut_0_C	id_uc002hrq.1_134_WT_pmut_0_C	id_uc002hrq.1_134
ATGGGGTTCGGTATGCGCTGTCCTCCGCTGTGGCAAGAAGAAGGTCTGGTCAGACCCCAATGAGACCAATGAAATCGCCAATGGTACGAGAAAGGCTCCCCGAGACGAT	WT_pmut_0_C	WT_pmut_0_C	id_uc002hrq.1_134_WT_pmut_0_C	id_uc002hrq.1_134_WT_pmut_0_C	id_uc002hrq.1_134
ATGGGGTTCGGTATGCGCGTTGGAGATTGATAATTCAGAACTTCTTTATACGCTCGAGTCTCCAGAGTCACTCCGTTCTAAGGTAGGGAGGAAGGCTCCCCGAGACGAT	WT_pmut_0_C	WT_pmut_0_C	id_uc001upy.3_1834_WT_pmut_0_C	id_uc001upy.3_1834_WT_pmut_0_C	id_uc001upy.3_1834
ATGGGGTTCGGTATGCGCCCTAGCGTCAGTATTTTCCCTGCTAGGGGTTTCAGGTCTCTTCCCCTCTCAGAGCTACTTGGGCCCAAACTTAAAGGCTCCCCGAGACGAT	WT_pmut_0_C	WT_pmut_0_C	id_uc004dwf.3_2921_WT_pmut_0_C	id_uc004dwf.3_2921_WT_pmut_0_C	id_uc004dwf.3_2921
ATGGGGTTCGGTATGCGCGCAAGGAAAAGAGGAAACATCTCGGGCCTAGTCCAAACCTTTGCCTCAAAGCCATCCCCCACCAGTGAGTTATAAGGCTCCCCGAGACGAT	WT_pmut_0_C	WT_pmut_0_C	id_uc002mbo.3_3110_WT_pmut_0_C	id_uc002mbo.3_3110_WT_pmut_0_C	id_uc002mbo.3_3110
ATGGGGTTCGGTATGCGCGCAAGGAAAAGAGGAAACATCTCGGGCCTAGTCCAAACCTTTGCCTCAAAGCCATCCCCCACCAGCTGCCTGCAAGGCTCCCCGAGACGAT	WT_pmut_0_C	WT_pmut_0_C	id_uc002mbo.3_3110_WT_pmut_0_C	id_uc002mbo.3_3110_WT_pmut_0_C	id_uc002mbo.3_3110
ATGGGGTTCGGTATGCGCACGCGGCTGCCTGCACTGACCGTTCACGTGACCCAGCCAAAGGACGGTGGCTTCTGCGAAGTGTGAAGAGCAGAAGGCTCCCCGAGACGAT	WT_pmut_0_C	WT_pmut_0_C	id_uc001jsm.3_1308_WT_pmut_0_C	id_uc001jsm.3_1308_WT_pmut_0_C	id_uc001jsm.3_1308
ATGGGGTTCGGTATGCGCCAGTAACAATGCTGCAGCTTTTCCGCGCTACCCGCAGAGGGGTCCATACGGCGTTGTTCTGGATTTTTGTTATAAGGCTCCCCGAGACGAT	WT_pmut_0_C	WT_pmut_0_C	id_uc002nrn.3_362_WT_pmut_0_C	id_uc002nrn.3_362_WT_pmut_0_C	id_uc002nrn.3_362
ATGGGGTTCGGTATGCGCGGAGGCCAATAAGAACCTCACATGGCGGGACACGCAACACCTGGTGGTACAGACCTCGAAGCCAGGGGTGTGCAAGGCTCCCCGAGACGAT	WT_pmut_0_C	WT_pmut_0_C	id_uc002bpu.1_1395_WT_pmut_0_C	id_uc002bpu.1_1395_WT_pmut_0_C	id_uc002bpu.1_1395
ATGGGGTTCGGTATGCGCCTCGCATTAACATAAAGAGCGGGAACAGCAGACTACCTAAAACCTCGGGCAGAAGAGGAGAGGAGTCCACTGGAAGGCTCCCCGAGACGAT	WT_pmut_0_C	WT_pmut_0_C	id_uc003gar.3_318_WT_pmut_0_C	id_uc003gar.3_318_WT_pmut_0_C	id_uc003gar.3_318
ATGGGGTTCGGTATGCGCGGGCCCCTGGAGCCGGCTGTCGTGGATGCCTTCAATCAAGCCTGGCATTTGGTTGCTCACGAATGCTTATCCAAAGGCTCCCCGAGACGAT	WT_pmut_0_C	WT_pmut_0_C	id_uc001bbw.3_1052_WT_pmut_0_C	id_uc001bbw.3_1052_WT_pmut_0_C	id_uc001bbw.3_1052
ATGGGGTTCGGTATGCGCTGTCCTCTGCTGTGGCAAGAAGAATATCTGGTCAGACCCCAATGAGACCAATGAAATCACCAATGATCGTGTAAAGGCTCCCCGAGACGAT	WT_pmut_0_C	WT_pmut_0_C	id_uc011klk.1_536_WT_pmut_0_C	id_uc011klk.1_536_WT_pmut_0_C	id_uc011klk.1_536
ATGGGGTTCGGTATGCGCCCACATGTGCTGGGTAGAGGGGTCCAGCCTGTCCCAGCCAGTGCCTGAACCTGTCCCTGAGAAGGCCCGAAGAAAGGCTCCCCGAGACGAT	WT_pmut_0_C	WT_pmut_0_C	id_uc002foj.3_1648_WT_pmut_0_C	id_uc002foj.3_1648_WT_pmut_0_C	id_uc002foj.3_1648
ATGGGGTTCGGTATGCGCGCCGCCTGGGAGCCGTCCGGCGCAGCAGTTTCCAGGTCCCCACTGTCCCCGCCGTCCCGCCCCTTCCTCGGGGAAGGCTCCCCGAGACGAT	WT_pmut_0_C	WT_pmut_0_C	id_uc002yto.3_95_WT_pmut_0_C	id_uc002yto.3_95_WT_pmut_0_C	id_uc002yto.3_95
ATGGGGTTCGGTATGCGCCCGAGCTCTCCAAGTCCAACAAGCAGAACCTCCTCCTTGGCTCCCTCACCAGCCGCTTGTGGCCTAGCTAATCAAGGCTCCCCGAGACGAT	WT_pmut_0_C	WT_pmut_0_C	id_uc002olu.1_1455_WT_pmut_0_C	id_uc002olu.1_1455_WT_pmut_0_C	id_uc002olu.1_1455
ATGGGGTTCGGTATGCGCCGGACATCAGGACATCTCTTACTGGGAGTAGTCCGAATCTATCACAGGAAAGCCAAATACCTTCTTAGTTCGCAAGGCTCCCCGAGACGAT	WT_pmut_0_C	WT_pmut_0_C	id_uc003yod.3_481_WT_pmut_0_C	id_uc003yod.3_481_WT_pmut_0_C	id_uc003yod.3_481
ATGGGGTTCGGTATGCGCCGGACATCAGGACATCTCTTACTGGGAGTAGTCCGAATCTATCACAGGAAAGCCAAATACCTTCTGAACCACAAAGGCTCCCCGAGACGAT	WT_pmut_0_C	WT_pmut_0_C	id_uc003yod.3_481_WT_pmut_0_C	id_uc003yod.3_481_WT_pmut_0_C	id_uc003yod.3_481
ATGGGGTTCGGTATGCGCCAATCTCCAATAGACTTGTGTCTTCACCCTGCCGCATTGTGACCAGCACCTACGGCTGGACAGCCTACCAAAGAAGGCTCCCCGAGACGAT	WT_pmut_0_C	WT_pmut_0_C	id_uc010iko.1_1388_WT_pmut_0_C	id_uc010iko.1_1388_WT_pmut_0_C	id_uc010iko.1_1388
ATGGGGTTCGGTATGCGCAGAGTCCGGGCACCTGTGCCTATGTGGAGGGTCCCAGCCCCAGCCAGGCCCCTCCGCTGCCCACATTCGCGCCAAGGCTCCCCGAGACGAT	WT_pmut_0_C	WT_pmut_0_C	id_uc003mbt.3_4675_WT_pmut_0_C	id_uc003mbt.3_4675_WT_pmut_0_C	id_uc003mbt.3_4675
ATGGGGTTCGGTATGCGCCCCAGCAAGCCACCCGAGGGGACTGCCTGGCCCTCCAGATGCGAGCTGGGTTGCTTCCCTGAGGGAGGCCATGAAGGCTCCCCGAGACGAT	WT_pmut_0_C	WT_pmut_0_C	id_uc001uef.3_1134_WT_pmut_0_C	id_uc001uef.3_1134_WT_pmut_0_C	id_uc001uef.3_1134
ATGGGGTTCGGTATGCGCTGTTAGGAGGGACTCTGAGCTTCACACCTGTCCGCTGCCATGGGTGCAGAGCCCTAGTCCTGATGAACACCTTAAGGCTCCCCGAGACGAT	WT_pmut_0_C	WT_pmut_0_C	id_uc002jzx.2_306_WT_pmut_0_C	id_uc002jzx.2_306_WT_pmut_0_C	id_uc002jzx.2_306
ATGGGGTTCGGTATGCGCAGGTCTACAGGGAGCCTGTCTCATGGAGACTGCAGAGCTGTTGCAAGCAAAGGTGAGCGCCCTAGTGAGCTGTAAGGCTCCCCGAGACGAT	WT_pmut_0_C	WT_pmut_0_C	id_uc001som.1_915_WT_pmut_0_C	id_uc001som.1_915_WT_pmut_0_C	id_uc001som.1_915
ATGGGGTTCGGTATGCGCTCGGGGGGACATCGCCAACGCTGAGCCACAGTCCCAGCCTGCTGCACAGCCTGGGCTCTGTCACGGGCTCTTCAAGGCTCCCCGAGACGAT	WT_pmut_0_C	WT_pmut_0_C	id_uc002jnz.4_1477_WT_pmut_0_C	id_uc002jnz.4_1477_WT_pmut_0_C	id_uc002jnz.4_1477
ATGGGGTTCGGTATGCGCTCGGGGGGACATCGCCAACGCTGAGCCACAGTCCCAGCCTGCTGCACAGCCTGGGCTCTGTCACGAGTCTAGCAAGGCTCCCCGAGACGAT	WT_pmut_0_C	WT_pmut_0_C	id_uc002jnz.4_1477_WT_pmut_0_C	id_uc002jnz.4_1477_WT_pmut_0_C	id_uc002jnz.4_1477
ATGGGGTTCGGTATGCGCTTGCAAAGGATATTGCCAGGAGAAGCAAAACTCTTAATCCAGGTGCTGGTTTGCCAACTGACAAAATAGTCTAAAGGCTCCCCGAGACGAT	WT_pmut_0_C	WT_pmut_0_C	id_uc002bww.3_619_WT_pmut_0_C	id_uc002bww.3_619_WT_pmut_0_C	id_uc002bww.3_619
ATGGGGTTCGGTATGCGCCCCGGACCTTCATTGCTACCCCTGGCAGCAGTCCCAGTCTGTGCATCGTGAATGACGAGCTGTTTTTGGAAATAAGGCTCCCCGAGACGAT	WT_pmut_0_C	WT_pmut_0_C	id_uc004eiv.4_3461_WT_pmut_0_C	id_uc004eiv.4_3461_WT_pmut_0_C	id_uc004eiv.4_3461
ATGGGGTTCGGTATGCGCTCTGAGAACAGTGAGGCTGGTCCTCGTGCCGTCCCAGCCGGTGCCCGGCCAGTGGGGAGGACACAAAACATGAAAGGCTCCCCGAGACGAT	WT_pmut_0_C	WT_pmut_0_C	id_uc001acu.2_1505_WT_pmut_0_C	id_uc001acu.2_1505_WT_pmut_0_C	id_uc001acu.2_1505
ATGGGGTTCGGTATGCGCGACCTGAGGATTTGCAGCCCCCAGCCCTGGGTCCAAGTCCCAGCTCTACCCCTTCTTGGCCCCTATTACTGTCAAGGCTCCCCGAGACGAT	WT_pmut_0_C	WT_pmut_0_C	id_uc003mbz.4_747_WT_pmut_0_C	id_uc003mbz.4_747_WT_pmut_0_C	id_uc003mbz.4_747
ATGGGGTTCGGTATGCGCGGGCGCGAGGATGACGACCTCAGGCGCGCTCTCTCCAAGCCTGGTGCCAGGCTCTCGGGGCGCCTCGACCGGAAAGGCTCCCCGAGACGAT	WT_pmut_0_C	WT_pmut_0_C	id_uc002yco.3_100_WT_pmut_0_C	id_uc002yco.3_100_WT_pmut_0_C	id_uc002yco.3_100
ATGGGGTTCGGTATGCGCGGCGCCTGCTGGTGGCTGAGCTGCAGCGTGGCCTCTTTGACAAGCACATCTGGCTCTCCATATGGTGCGCCGCAAGGCTCCCCGAGACGAT	WT_pmut_0_C	WT_pmut_0_C	id_uc002cos.1_9979_WT_pmut_0_C	id_uc002cos.1_9979_WT_pmut_0_C	id_uc002cos.1_9979
ATGGGGTTCGGTATGCGCCCTTCCAGGGGGTCTTCATCTTCGTCTTTCACCGCGCCTTACAGAAGAAGGTGCACAAGGAGTACGGTCACGCAAGGCTCCCCGAGACGAT	WT_pmut_0_C	WT_pmut_0_C	id_uc010xnn.2_3589_WT_pmut_0_C	id_uc010xnn.2_3589_WT_pmut_0_C	id_uc010xnn.2_3589
ATGGGGTTCGGTATGCGCCTCTGCAGGTGGCGACCTGCACATGACCCAGTCTTTCCGAGGCAATCTGGCTGGCTTAACTCTCCTGCCTTAAAAGGCTCCCCGAGACGAT	WT_pmut_0_C	WT_pmut_0_C	id_uc001aqh.3_2361_WT_pmut_0_C	id_uc001aqh.3_2361_WT_pmut_0_C	id_uc001aqh.3_2361
ATGGGGTTCGGTATGCGCCCAAAGTGTGGGATGCTGTCTCAGGAGATGAACTGATGACCCTGGCTCATAAACACATTGTCAAGGTCGATTAAAGGCTCCCCGAGACGAT	WT_pmut_0_C	WT_pmut_0_C	id_uc001rdc.4_635_WT_pmut_0_C	id_uc001rdc.4_635_WT_pmut_0_C	id_uc001rdc.4_635
ATGGGGTTCGGTATGCGCTGGAGGCTGTGGCCCTCTACAACCCTGTGAGCCTTGCCTTTGAGGTGACTCAGGACTTCATGATGCCAGTGACAAGGCTCCCCGAGACGAT	WT_pmut_0_C	WT_pmut_0_C	id_uc021srk.1_849_WT_pmut_0_C	id_uc021srk.1_849_WT_pmut_0_C	id_uc021srk.1_849
ATGGGGTTCGGTATGCGCTGCAGCAGCTCAATGCCTACAACCGCACTCGGCATGAACTGCGGGAATTCCTGGAGGACACCTGTTACAAGTGAAGGCTCCCCGAGACGAT	WT_pmut_0_C	WT_pmut_0_C	id_uc002xbt.3_711_WT_pmut_0_C	id_uc002xbt.3_711_WT_pmut_0_C	id_uc002xbt.3_711
ATGGGGTTCGGTATGCGCCCGACCCGATCCTCATCTCACTGCGGGAGGCCCACGTGCCCAGCAAGCAGCGGGACCTGAAGATCGGCATCAAAAGGCTCCCCGAGACGAT	WT_pmut_0_C	WT_pmut_0_C	id_uc001olk.1_1298_WT_pmut_0_C	id_uc001olk.1_1298_WT_pmut_0_C	id_uc001olk.1_1298
ATGGGGTTCGGTATGCGCCCAGTCCGTTCTGTCACCAGGCCCCTTCGGGTCCCACTCCCACATCCGTGGCCTCACCAGCTGCCTTACGGGGAAGGCTCCCCGAGACGAT	WT_pmut_0_C	WT_pmut_0_C	id_uc001hqx.4_1906_WT_pmut_0_C	id_uc001hqx.4_1906_WT_pmut_0_C	id_uc001hqx.4_1906
ATGGGGTTCGGTATGCGCCCGAGGCGGGTGGATCACCTGAGGTCAGGAGTCCGAGACCAGCCTGACCAACATGGTGAAACCCCAGCTACGCAAGGCTCCCCGAGACGAT	WT_pmut_0_C	WT_pmut_0_C	id_uc010dvo.2_1051_WT_pmut_0_C	id_uc010dvo.2_1051_WT_pmut_0_C	id_uc010dvo.2_1051
ATGGGGTTCGGTATGCGCGATGTTACTAATATGACTCATACAGATGCAGTCAATCTGCTCCGGGCTGCATCCAAAACAGTCAGTGGAAGATAAGGCTCCCCGAGACGAT	WT_pmut_0_C	WT_pmut_0_C	id_uc003hpy.3_6049_WT_pmut_0_C	id_uc003hpy.3_6049_WT_pmut_0_C	id_uc003hpy.3_6049
ATGGGGTTCGGTATGCGCGGAGCAGGGGCTCCCTGCAGACAGGGGGGGCCCTCGCCCTGGAAGCCTGGACGCCGAGATAGACTCAACGGACAAGGCTCCCCGAGACGAT	WT_pmut_0_C	WT_pmut_0_C	id_uc022aiu.1_306_WT_pmut_0_C	id_uc022aiu.1_306_WT_pmut_0_C	id_uc022aiu.1_306
ATGGGGTTCGGTATGCGCACATTGCCCCTCAGTGTGGCTTCCTGTTGTGGCGCATGGCCCCGAGCCCTTCTAATGGGGCTGAACCTTTCCAAAGGCTCCCCGAGACGAT	WT_pmut_0_C	WT_pmut_0_C	id_uc011cvx.1_883_WT_pmut_0_C	id_uc011cvx.1_883_WT_pmut_0_C	id_uc011cvx.1_883
ATGGGGTTCGGTATGCGCTCCCCCAGCAGGCCGTCATGCTGCATACTCTGCAGGTTGGGAGATGGCACCTGCGGGGGCACCTGATACGTCAAAGGCTCCCCGAGACGAT	WT_pmut_0_C	WT_pmut_0_C	id_uc009wtf.3_1104_WT_pmut_0_C	id_uc009wtf.3_1104_WT_pmut_0_C	id_uc009wtf.3_1104
ATGGGGTTCGGTATGCGCCGGCCGCCTTTGCCGCCTACTGAAGCCGGCGCCGCTCTGTGGGGCTCTGGCCGCGCCTGGCCTGGGCAAATCCAAGGCTCCCCGAGACGAT	WT_pmut_0_C	WT_pmut_0_C	id_uc021umf.1_149_WT_pmut_0_C	id_uc021umf.1_149_WT_pmut_0_C	id_uc021umf.1_149
ATGGGGTTCGGTATGCGCCTTCACTCCCTCCCTTTGGCCACTGGCCCAGTCCCAGCCTCTGATTGTGGCAGCAGCTTCATACCAGTTATTGAAGGCTCCCCGAGACGAT	WT_pmut_0_C	WT_pmut_0_C	id_uc010roq.1_606_WT_pmut_0_C	id_uc010roq.1_606_WT_pmut_0_C	id_uc010roq.1_606
ATGGGGTTCGGTATGCGCCTGGGGGGCACTTCGGGCGCCGCAACAGCAGCCTCGAGAGCTGTGCCCAGGAGTGAACAACCAGCTTGGTGCAAAGGCTCCCCGAGACGAT	WT_pmut_0_C	WT_pmut_0_C	id_uc002slj.2_275_WT_pmut_0_C	id_uc002slj.2_275_WT_pmut_0_C	id_uc002slj.2_275
ATGGGGTTCGGTATGCGCTCCTCTCCATGCAGCCGCCTTCACAGACCATGCAGAGTGTTTACAGCTGCTGCTCAGCCATAATGCAAGATCCAAGGCTCCCCGAGACGAT	WT_pmut_0_C	WT_pmut_0_C	id_uc003caj.1_2651_WT_pmut_0_C	id_uc003caj.1_2651_WT_pmut_0_C	id_uc003caj.1_2651
ATGGGGTTCGGTATGCGCACCAAAGAAAGGAAGAATGCACTTTTCAGGATCAGAAGAGGCTGTGTATAGAAACATACAAGCTTTAACGGCAAAGGCTCCCCGAGACGAT	WT_pmut_0_C	WT_pmut_0_C	id_uc011acp.2_144_WT_pmut_0_C	id_uc011acp.2_144_WT_pmut_0_C	id_uc011acp.2_144
ATGGGGTTCGGTATGCGCGCAAGCAGCTGCGGTTTGCACTCAAGACCTACCTTCCTTACACTTCTCCATCTCTTGCCATGGTGCCCACATGAAGGCTCCCCGAGACGAT	WT_pmut_0_C	WT_pmut_0_C	id_uc004avh.3_1284_WT_pmut_0_C	id_uc004avh.3_1284_WT_pmut_0_C	id_uc004avh.3_1284
ATGGGGTTCGGTATGCGCTGTGCACGTCTCATGCATTGAACCAGGATTGTCCAAAACAAACTTGGCAGATCCAGTAAAGGTAAGCGCCGCCAAGGCTCCCCGAGACGAT	WT_pmut_0_C	WT_pmut_0_C	id_uc002uep.3_2131_WT_pmut_0_C	id_uc002uep.3_2131_WT_pmut_0_C	id_uc002uep.3_2131
ATGGGGTTCGGTATGCGCATCTTGGTGACTTTGGGATGCTGGTTTCATTGCAGGTATAATTATGCAAAGCAAAGAATCCAGGAAAGGGATAAAGGCTCCCCGAGACGAT	WT_pmut_0_C	WT_pmut_0_C	id_uc001iar.3_610_WT_pmut_0_C	id_uc001iar.3_610_WT_pmut_0_C	id_uc001iar.3_610
ATGGGGTTCGGTATGCGCTGAATAGTTGAAATGTATATTTGTACAGTCTTCTAGACCTATTCAAGTGATGCTCATGATCCTGTCCCATGGCAAGGCTCCCCGAGACGAT	WT_pmut_0_C	WT_pmut_0_C	id_uc002xvu.1_3950_WT_pmut_0_C	id_uc002xvu.1_3950_WT_pmut_0_C	id_uc002xvu.1_3950
ATGGGGTTCGGTATGCGCGTTTGAACCCAGAACTCCAGATGAATTATACTCTGAGGAAGGTGATATTATCTACATTACTGACAACAGATTGAAGGCTCCCCGAGACGAT	WT_pmut_0_C	WT_pmut_0_C	id_uc004ajv.4_310_WT_pmut_0_C	id_uc004ajv.4_310_WT_pmut_0_C	id_uc004ajv.4_310
ATGGGGTTCGGTATGCGCGGAACCTCCAGACAAGCTCTCAAGTCCATTTGCAGGAGAACATAGGGTAGTCAAGCTTCCAAGATGGTTTTATAAGGCTCCCCGAGACGAT	WT_pmut_0_C	WT_pmut_0_C	id_uc003vgc.3_2220_WT_pmut_0_C	id_uc003vgc.3_2220_WT_pmut_0_C	id_uc003vgc.3_2220
ATGGGGTTCGGTATGCGCCATGGAGACCAAAGGTGCCAGCAGCCCTGGGACTCTCGTGCTGACCACGGGCCTGAGCAAACCCTGATTCGTGAAGGCTCCCCGAGACGAT	WT_pmut_0_C	WT_pmut_0_C	id_uc001vrs.2_1438_WT_pmut_0_C	id_uc001vrs.2_1438_WT_pmut_0_C	id_uc001vrs.2_1438
ATGGGGTTCGGTATGCGCGGACAACACACTATACACCTCTTGCATGTGGTCCAAATCCTCTGAAGAGAGAGATTGGGGACTATCGTGAAGAAAGGCTCCCCGAGACGAT	WT_pmut_0_C	WT_pmut_0_C	id_uc004fmm.3_437_WT_pmut_0_C	id_uc004fmm.3_437_WT_pmut_0_C	id_uc004fmm.3_437
ATGGGGTTCGGTATGCGCGGACAACACACTATACACCTCTTGCATGTGGTCCAAATCCTCTGAAGAGAGAGATTGGGGACTATATAGGTTGAAGGCTCCCCGAGACGAT	WT_pmut_0_C	WT_pmut_0_C	id_uc004fmm.3_437_WT_pmut_0_C	id_uc004fmm.3_437_WT_pmut_0_C	id_uc004fmm.3_437
ATGGGGTTCGGTATGCGCCGTTTTCATCTCTACACGTTGAACGATGGGCACTTGATGTAGAACTACTGTACATAGCACAGTTCGACCGGGAAAGGCTCCCCGAGACGAT	WT_pmut_0_C	WT_pmut_0_C	id_uc001uvy.3_846_WT_pmut_0_C	id_uc001uvy.3_846_WT_pmut_0_C	id_uc001uvy.3_846
ATGGGGTTCGGTATGCGCATAAACACTAACCACCTCGACAAGCAACAGGTCCAACTCCTGGCAGAGATGTGTATCCTTATTGAGTCCTTATAAGGCTCCCCGAGACGAT	WT_pmut_0_C	WT_pmut_0_C	id_uc001iga.3_332_WT_pmut_0_C	id_uc001iga.3_332_WT_pmut_0_C	id_uc001iga.3_332
ATGGGGTTCGGTATGCGCATAAACACTAACCACCTCGACAAGCAACAGGTCCAACTCCTGGCAGAGATGTGTATCCTTATTGAGAGGTCAAAAGGCTCCCCGAGACGAT	WT_pmut_0_C	WT_pmut_0_C	id_uc001iga.3_332_WT_pmut_0_C	id_uc001iga.3_332_WT_pmut_0_C	id_uc001iga.3_332
ATGGGGTTCGGTATGCGCCGTACTGACAGATTACTTTTAACTCCATGGGTCAAATTCCTGTGGGAGTCTTACAGGCAGTGTTTGTGTTAACAAGGCTCCCCGAGACGAT	WT_pmut_0_C	WT_pmut_0_C	id_uc001ldu.3_597_WT_pmut_0_C	id_uc001ldu.3_597_WT_pmut_0_C	id_uc001ldu.3_597
ATGGGGTTCGGTATGCGCGCAGGCACTTCAGAGCTTACCTTATGTGTTCACTCCACCTGATATCCAGACCCCAGAGTCATCGTTCTCAAGCAAGGCTCCCCGAGACGAT	WT_pmut_0_C	WT_pmut_0_C	id_uc001qlh.3_627_WT_pmut_0_C	id_uc001qlh.3_627_WT_pmut_0_C	id_uc001qlh.3_627
ATGGGGTTCGGTATGCGCGGGAGGGAACACCATTCACAAAGGCTGACGGTCCCAGTCCGAAGTCGTGGGCCCACCAGGATGCTCGTGGAGTAAGGCTCCCCGAGACGAT	WT_pmut_0_C	WT_pmut_0_C	id_uc002sin.1_2072_WT_pmut_0_C	id_uc002sin.1_2072_WT_pmut_0_C	id_uc002sin.1_2072
ATGGGGTTCGGTATGCGCCACTTCTCACCGAGATGATTCATGAAGCGGCTCACAGGGAGAACACAGTTGGCCTCCACCGTTTCTCGGGATTAAGGCTCCCCGAGACGAT	WT_pmut_0_C	WT_pmut_0_C	id_uc004chl.3_646_WT_pmut_0_C	id_uc004chl.3_646_WT_pmut_0_C	id_uc004chl.3_646
ATGGGGTTCGGTATGCGCTCAAAGATAAGTGGATCCATTCTCAATGAACTCATTGGACTTGTGAGATCACCCTTATTGCAGGGTTCGCTCGAAGGCTCCCCGAGACGAT	WT_pmut_0_C	WT_pmut_0_C	id_uc001stn.2_2652_WT_pmut_0_C	id_uc001stn.2_2652_WT_pmut_0_C	id_uc001stn.2_2652
ATGGGGTTCGGTATGCGCATTATTAGTTCACTTCCCTGCTGCCATGAAACCTTGCCTTAAGAAGGTGCTGGATTCCAAGGTTTACGTCGCAAAGGCTCCCCGAGACGAT	WT_pmut_0_C	WT_pmut_0_C	id_uc011cjx.2_5066_WT_pmut_0_C	id_uc011cjx.2_5066_WT_pmut_0_C	id_uc011cjx.2_5066
ATGGGGTTCGGTATGCGCCCTCAAAGTGGCTAGAAACTTGTCAGCATGAACCAGATGAGCAGCCTCTAGATCCAATTCCCCAAACGCCACTAAGGCTCCCCGAGACGAT	WT_pmut_0_C	WT_pmut_0_C	id_uc002hbq.3_382_WT_pmut_0_C	id_uc002hbq.3_382_WT_pmut_0_C	id_uc002hbq.3_382
ATGGGGTTCGGTATGCGCACCAACACTGAAATTCTGTGGCATCACATATACTGGGCCTTGATGTCATGACAGATCAAAATCATTACCCTGAAAGGCTCCCCGAGACGAT	WT_pmut_0_C	WT_pmut_0_C	id_uc001pfu.3_2600_WT_pmut_0_C	id_uc001pfu.3_2600_WT_pmut_0_C	id_uc001pfu.3_2600
ATGGGGTTCGGTATGCGCAAACATTCTAGCGGCCATCGAGGGCTCCAGGTCCTACACCTCGGACCCCAGCCAGGCGTGCCTCTACATATTAAAGGCTCCCCGAGACGAT	WT_pmut_0_C	WT_pmut_0_C	id_uc003yok.1_1202_WT_pmut_0_C	id_uc003yok.1_1202_WT_pmut_0_C	id_uc003yok.1_1202
ATGGGGTTCGGTATGCGCAAACATTCTAGCGGCCATCGAGGGCTCCAGGTCCTACACCTCGGACCCCAGCCAGGCGTGCCTCTCTCCGGCGAAGGCTCCCCGAGACGAT	WT_pmut_0_C	WT_pmut_0_C	id_uc003yok.1_1202_WT_pmut_0_C	id_uc003yok.1_1202_WT_pmut_0_C	id_uc003yok.1_1202
ATGGGGTTCGGTATGCGCTTGAATATACTTTTTCAAACAAAGTTTCATGTCCTAATCATTGTCTGATTTCAGCATTAAATGAAAGTCGTGAAAGGCTCCCCGAGACGAT	WT_pmut_0_C	WT_pmut_0_C	id_uc002sux.1_2909_WT_pmut_0_C	id_uc002sux.1_2909_WT_pmut_0_C	id_uc002sux.1_2909
ATGGGGTTCGGTATGCGCACTCCTCATCCATTTTCTCCTTCAGTCTATGTCCTACCCATGATAAATTGCTATTTTCCTCCCAAGAATAATGAAGGCTCCCCGAGACGAT	WT_pmut_0_C	WT_pmut_0_C	id_uc003tds.1_158_WT_pmut_0_C	id_uc003tds.1_158_WT_pmut_0_C	id_uc003tds.1_158
ATGGGGTTCGGTATGCGCTGGGTGGGGGCTACCACCCACCCTCTCAGTCTCGTGAAGAGTCTGGGACCTCCTTCTTCCCCACTAAGAACCGAAGGCTCCCCGAGACGAT	WT_pmut_0_C	WT_pmut_0_C	id_uc002nan.3_7266_WT_pmut_0_C	id_uc002nan.3_7266_WT_pmut_0_C	id_uc002nan.3_7266
ATGGGGTTCGGTATGCGCACATATATATAAAAAGGTTTGATCCATCAAGCCTGGCTCATGGGATCTGCTGCTGCATTAAATCGACTTCAGGAAGGCTCCCCGAGACGAT	WT_pmut_0_C	WT_pmut_0_C	id_uc003fdn.3_1986_WT_pmut_0_C	id_uc003fdn.3_1986_WT_pmut_0_C	id_uc003fdn.3_1986
ATGGGGTTCGGTATGCGCCTTCCATACCATCCCTCCAGGGATGCCTGAGTCCCAGTCTGAGGGTCACTGCACTTTGGAGTGCCGACAACCGAAGGCTCCCCGAGACGAT	WT_pmut_0_C	WT_pmut_0_C	id_uc003qde.3_1098_WT_pmut_0_C	id_uc003qde.3_1098_WT_pmut_0_C	id_uc003qde.3_1098
ATGGGGTTCGGTATGCGCCTTCCATACCATCCCTCCAGGGATGCCTGAGTCCCAGTCTGAGGGTCACTGCACTTTGGAGTGCCGCTTTTTAAAGGCTCCCCGAGACGAT	WT_pmut_0_C	WT_pmut_0_C	id_uc003qde.3_1098_WT_pmut_0_C	id_uc003qdf.3_1173_WT_pmut_0_C	id_uc003qdf.3_1173
ATGGGGTTCGGTATGCGCAATGCTATAGACTTTTCTGCAGGAATGACGTGCATATTCCTCACTGGCATTTACCAAAAATAAATCTCGTTGTAAGGCTCCCCGAGACGAT	WT_pmut_0_C	WT_pmut_0_C	id_uc010xph.2_5046_WT_pmut_0_C	id_uc010xph.2_5046_WT_pmut_0_C	id_uc010xph.2_5046
ATGGGGTTCGGTATGCGCTGGCCAATCACTGGTGTCACCGGGCAGCTGTCCAGAGGACTTCCGCGCCACACCATTCATCGAATGCCTCTCAAAGGCTCCCCGAGACGAT	WT_pmut_0_C	WT_pmut_0_C	id_uc001vqx.3_5230_WT_pmut_0_C	id_uc001vqx.3_5230_WT_pmut_0_C	id_uc001vqx.3_5230
ATGGGGTTCGGTATGCGCGTAGTGAGTGTGGAAAAGTCTTCTCTAAGAGTCCAACTCTTAATAAACATCAGAAAATTCATAATATATGCTTAAGGCTCCCCGAGACGAT	WT_pmut_0_C	WT_pmut_0_C	id_uc003mjo.2_873_WT_pmut_0_C	id_uc003mjo.2_873_WT_pmut_0_C	id_uc003mjo.2_873
ATGGGGTTCGGTATGCGCACAAAAGATTTAAACCATTGTGATGGCGTATACTCTCAAATGGTAATATCTTGCAATGGCACACATTGAGGCTAAGGCTCCCCGAGACGAT	WT_pmut_0_C	WT_pmut_0_C	id_uc001ztr.3_2632_WT_pmut_0_C	id_uc001ztr.3_2632_WT_pmut_0_C	id_uc001ztr.3_2632
ATGGGGTTCGGTATGCGCGTATCTATAGGTAAATCTCAAGGGTAAAATGTCAGGTGTTGACATTGAGAACCCTGAAACCCCATGACGCGCCAAGGCTCCCCGAGACGAT	WT_pmut_0_C	WT_pmut_0_C	id_uc003mzk.4_799_WT_pmut_0_C	id_uc003mzk.4_799_WT_pmut_0_C	id_uc003mzk.4_799
ATGGGGTTCGGTATGCGCATTGGACGAGACTGGGAAACCAAAAACTTTGACTTTGAGGATGTTTTTGTGAAGATTCCCCAAGCGGCTGGCCAAGGCTCCCCGAGACGAT	WT_pmut_0_C	WT_pmut_0_C	id_uc001qnc.3_450_WT_pmut_0_C	id_uc001qnc.3_450_WT_pmut_0_C	id_uc001qnc.3_450
ATGGGGTTCGGTATGCGCGGGGACAGCCTCTTCCTGAGGAAAGCTGAGGACTTTGGAAATCGGCTAATGCCTGCCTTCAGAACAATTATCCAAGGCTCCCCGAGACGAT	WT_pmut_0_C	WT_pmut_0_C	id_uc004cld.2_1107_WT_pmut_0_C	id_uc004cld.2_1107_WT_pmut_0_C	id_uc004cld.2_1107
ATGGGGTTCGGTATGCGCGACCACCAACGTGGCCGGCCTCTCCTCTGAGTCCTACACCACCTTCAAGGCTTGTGAGCAGTTTCAGATACCTAAGGCTCCCCGAGACGAT	WT_pmut_0_C	WT_pmut_0_C	id_uc001cxj.2_1785_WT_pmut_0_C	id_uc001cxj.2_1785_WT_pmut_0_C	id_uc001cxj.2_1785
ATGGGGTTCGGTATGCGCGCGGCCTCCAGGTGGTGGATCCAATTTTTCATCAGGTTTTGATGAACCAACAGAACAACCTGTGAGCCCCGATAAGGCTCCCCGAGACGAT	WT_pmut_0_C	WT_pmut_0_C	id_uc002jmz.1_474_WT_pmut_0_C	id_uc002jmz.1_474_WT_pmut_0_C	id_uc002jmz.1_474
ATGGGGTTCGGTATGCGCGGGAGGGAAAGCAAGCCTGGCAGAGGCACCCACTCCATTCCCAGCTTGCTCCGTAGCTGGTGATTGCAGAGGTAAGGCTCCCCGAGACGAT	WT_pmut_0_C	WT_pmut_0_C	id_uc003eme.1_693_WT_pmut_0_C	id_uc003eme.1_693_WT_pmut_0_C	id_uc003eme.1_693
ATGGGGTTCGGTATGCGCGGGAGGGAAAGCAAGCCTGGCAGAGGCACCCACTCCATTCCCAGCTTGCTCCGTAGCTGGCGATTGTCGAGCGAAGGCTCCCCGAGACGAT	WT_pmut_0_C	WT_pmut_0_C	id_uc003bxl.3_87_WT_pmut_0_C	id_uc003bxl.3_87_WT_pmut_0_C	id_uc003bxl.3_87
ATGGGGTTCGGTATGCGCGCAACAGGCGTGGGTCACGCTCTCGCTCGGTCCTTCTGCCGCCATCTTGGTTCCGCGTTCCCTGCGACGGTCGAAGGCTCCCCGAGACGAT	WT_pmut_0_C	WT_pmut_0_C	id_uc001sma.2_246_WT_pmut_0_C	id_uc001sma.2_246_WT_pmut_0_C	id_uc001sma.2_246
ATGGGGTTCGGTATGCGCAAGCATATCAGGTTAGAACTCTCATCACATGTCCGACTCAAATTGTGGAGCAAAAGAGTAAATAAAGCGAACAAAGGCTCCCCGAGACGAT	WT_pmut_0_C	WT_pmut_0_C	id_uc021zhr.1_1149_WT_pmut_0_C	id_uc021zhr.1_1149_WT_pmut_0_C	id_uc021zhr.1_1149
[truncated: 6,216 more rows]

## Sheet: MPRA_treat
id	# reads beginning	# reads overlapping	PseudoUposition_id	mutgroup	psi ratio
id_uc001ack.2_5490_WT_pmut_0_C	51	3798	id_uc001ack.2_5490	WT_pmut_0_C	0.0134281
id_uc001acu.2_1505_WT	278	2055	id_uc001acu.2_1505	WT	0.13528
id_uc001acu.2_1505_WT_pmut_0_C	10	2283	id_uc001acu.2_1505	WT_pmut_0_C	0.0043802
id_uc001ady.2_265_WT	41	855	id_uc001ady.2_265	WT	0.0479532
id_uc001als.2_3526_WT	912	2932	id_uc001als.2_3526	WT	0.31105
id_uc001als.2_3526_WT_pmut_0_C	16	2411	id_uc001als.2_3526	WT_pmut_0_C	0.00663625
id_uc001amd.3_1136_WT	234	938	id_uc001amd.3_1136	WT	0.249467
id_uc001amd.3_1136_WT_pmut_0_C	91	3185	id_uc001amd.3_1136	WT_pmut_0_C	0.0285714
id_uc001amk.3_3144_WT	273	1498	id_uc001amk.3_3144	WT	0.182243
id_uc001amk.3_3144_WT_pmut_0_C	15	1268	id_uc001amk.3_3144	WT_pmut_0_C	0.0118297
id_uc001aqh.3_2361_WT_pmut_0_C	43	1131	id_uc001aqh.3_2361	WT_pmut_0_C	0.0380195
id_uc001arc.3_370_WT	93	2425	id_uc001arc.3_370	WT	0.0383505
id_uc001arc.3_370_WT_pmut_0_C	20	1560	id_uc001arc.3_370	WT_pmut_0_C	0.0128205
id_uc001arc.3_807_WT	102	1284	id_uc001arc.3_807	WT	0.0794393
id_uc001arc.3_807_WT_pmut_0_C	8	583	id_uc001arc.3_807	WT_pmut_0_C	0.0137221
id_uc001arj.3_101_WT	54	1433	id_uc001arj.3_101	WT	0.0376832
id_uc001arj.3_101_WT_pmut_0_C	13	1575	id_uc001arj.3_101	WT_pmut_0_C	0.00825397
id_uc001aym.4_168_WT	66	1567	id_uc001aym.4_168	WT	0.0421187
id_uc001aym.4_168_WT_pmut_0_C	28	1318	id_uc001aym.4_168	WT_pmut_0_C	0.0212443
id_uc001azu.2_1131_WT	8	1772	id_uc001azu.2_1131	WT	0.00451467
id_uc001bbw.3_1052_WT	55	1575	id_uc001bbw.3_1052	WT	0.0349206
id_uc001bbw.3_1052_WT_pmut_0_C	8	1354	id_uc001bbw.3_1052	WT_pmut_0_C	0.00590842
id_uc001ber.3_2553_WT	1	1449	id_uc001ber.3_2553	WT	0.000690131
id_uc001ber.3_2553_WT_pmut_0_C	29	1528	id_uc001ber.3_2553	WT_pmut_0_C	0.0189791
id_uc001bev.3_525_WT	251	5196	id_uc001bev.3_525	WT	0.0483064
id_uc001bev.3_525_WT_pmut_0_C	153	5194	id_uc001bev.3_525	WT_pmut_0_C	0.0294571
id_uc001bfr.3_1722_WT	137	2388	id_uc001bfr.3_1722	WT	0.0573702
id_uc001bfr.3_1722_WT_pmut_0_C	44	2125	id_uc001bfr.3_1722	WT_pmut_0_C	0.0207059
id_uc001bgp.4_788_WT	30	1576	id_uc001bgp.4_788	WT	0.0190355
id_uc001bgp.4_788_WT_pmut_0_C	43	1171	id_uc001bgp.4_788	WT_pmut_0_C	0.0367208
id_uc001bjc.3_744_WT	60	1129	id_uc001bjc.3_744	WT	0.0531444
id_uc001bjc.3_744_WT_pmut_0_C	13	463	id_uc001bjc.3_744	WT_pmut_0_C	0.0280778
id_uc001bjf.3_1280_WT	1416	2748	id_uc001bjf.3_1280	WT	0.515284
id_uc001bjf.3_1280_WT_pmut_0_C	43	1998	id_uc001bjf.3_1280	WT_pmut_0_C	0.0215215
id_uc001bld.4_2945_WT	50	2916	id_uc001bld.4_2945	WT	0.0171468
id_uc001bld.4_2945_WT_pmut_0_C	18	1706	id_uc001bld.4_2945	WT_pmut_0_C	0.010551
id_uc001bnr.4_963_WT	74	1913	id_uc001bnr.4_963	WT	0.0386827
id_uc001bnr.4_963_WT_pmut_0_C	44	2035	id_uc001bnr.4_963	WT_pmut_0_C	0.0216216
id_uc001bou.4_2797_WT	108	1447	id_uc001bou.4_2797	WT	0.0746372
id_uc001bou.4_2797_WT_pmut_0_C	26	1190	id_uc001bou.4_2797	WT_pmut_0_C	0.0218487
id_uc001bpe.1_433_WT	72	1046	id_uc001bpe.1_433	WT	0.0688337
id_uc001bpe.1_433_WT_pmut_0_C	72	1645	id_uc001bpe.1_433	WT_pmut_0_C	0.043769
id_uc001bpe.1_435_WT	16	700	id_uc001bpe.1_435	WT	0.0228571
id_uc001bpe.1_435_WT_pmut_0_C	26	1282	id_uc001bpe.1_435	WT_pmut_0_C	0.0202808
id_uc001bpr.3_869_WT	88	1820	id_uc001bpr.3_869	WT	0.0483516
id_uc001bpr.3_869_WT_pmut_0_C	37	1509	id_uc001bpr.3_869	WT_pmut_0_C	0.0245195
id_uc001bqa.2_150_WT_pmut_0_C	6	722	id_uc001bqa.2_150	WT_pmut_0_C	0.00831025
id_uc001bqd.3_118_WT	58	1480	id_uc001bqd.3_118	WT	0.0391892
id_uc001bqd.3_118_WT_pmut_0_C	32	1725	id_uc001bqd.3_118	WT_pmut_0_C	0.0185507
id_uc001bqd.3_135_WT	67	3152	id_uc001bqd.3_135	WT	0.0212563
id_uc001brp.1_266_WT	115	1990	id_uc001brp.1_266	WT	0.0577889
id_uc001brp.1_266_WT_pmut_0_C	0	3617	id_uc001brp.1_266	WT_pmut_0_C	0
id_uc001bvr.3_4300_WT	38	4657	id_uc001bvr.3_4300	WT	0.00815976
id_uc001bvr.3_4300_WT_pmut_0_C	5	1674	id_uc001bvr.3_4300	WT_pmut_0_C	0.00298686
id_uc001bvr.3_928_WT	211	4123	id_uc001bvr.3_928	WT	0.0511763
id_uc001bvr.3_928_WT_pmut_0_C	44	1769	id_uc001bvr.3_928	WT_pmut_0_C	0.0248728
id_uc001bvs.3_179_WT	133	2716	id_uc001bvs.3_179	WT	0.0489691
id_uc001bvs.3_179_WT_pmut_0_C	131	3118	id_uc001bvs.3_179	WT_pmut_0_C	0.0420141
id_uc001bwo.2_551_WT_disruptallCompPos_Restore_6_pos_DecreaseLoop6	0	471	id_uc001bwo.2_551	WT_disruptallCompPos_Restore_6_pos_DecreaseLoop6	0
id_uc001bwo.2_551_WT_disruptallCompPos_Restore_6_pos_ExtendLoop80T	143	602	id_uc001bwo.2_551	WT_disruptallCompPos_Restore_6_pos_ExtendLoop80T	0.237542
id_uc001bwo.2_551_WT_disruptallCompPos_Restore_6_pos_ExtendLoop80TT	19	449	id_uc001bwo.2_551	WT_disruptallCompPos_Restore_6_pos_ExtendLoop80TT	0.0423163
id_uc001bwo.2_551_WTTRUB1_disruptallCompPos_Restore_1_pos	26	721	id_uc001bwo.2_551	WTTRUB1_disruptallCompPos_Restore_1_pos	0.036061
id_uc001bwo.2_551_WTTRUB1_disruptallCompPos_Restore_2_pos	16	728	id_uc001bwo.2_551	WTTRUB1_disruptallCompPos_Restore_2_pos	0.021978
id_uc001bwo.2_551_WTTRUB1_disruptallCompPos_Restore_3_pos	41	502	id_uc001bwo.2_551	WTTRUB1_disruptallCompPos_Restore_3_pos	0.0816733
id_uc001bwo.2_551_WTTRUB1_disruptallCompPos_Restore_4_pos	101	390	id_uc001bwo.2_551	WTTRUB1_disruptallCompPos_Restore_4_pos	0.258974
id_uc001bwo.2_551_WTTRUB1_disruptallCompPos_Restore_5_pos	64	422	id_uc001bwo.2_551	WTTRUB1_disruptallCompPos_Restore_5_pos	0.151659
id_uc001bwo.2_551_WTTRUB1_disruptCompPos_-5	3	302	id_uc001bwo.2_551	WTTRUB1_disruptCompPos_-5	0.00993377
id_uc001bwo.2_551_WTTRUB1_ExtendLoop80TT	10	277	id_uc001bwo.2_551	WTTRUB1_ExtendLoop80TT	0.0361011
id_uc001bwo.2_551_WTTRUB1_pmut_2_T	139	471	id_uc001bwo.2_551	WTTRUB1_pmut_2_T	0.295117
id_uc001bwo.2_551_WTTRUB1_pmut_3_G	0	588	id_uc001bwo.2_551	WTTRUB1_pmut_3_G	0
id_uc001bwo.2_551_WTTRUB1_pmut_3_T	15	349	id_uc001bwo.2_551	WTTRUB1_pmut_3_T	0.0429799
id_uc001bwo.2_551_WTTRUB1_pmut_4_A	107	269	id_uc001bwo.2_551	WTTRUB1_pmut_4_A	0.39777
id_uc001bwo.2_551_WTTRUB1_pmut_4_G	34	206	id_uc001bwo.2_551	WTTRUB1_pmut_4_G	0.165049
id_uc001bwo.2_551_WTTRUB1_pmut_4_T	141	333	id_uc001bwo.2_551	WTTRUB1_pmut_4_T	0.423423
id_uc001bwo.2_551_WTTRUB1_pmut_5_A	49	455	id_uc001bwo.2_551	WTTRUB1_pmut_5_A	0.107692
id_uc001bwo.2_551_WTTRUB1_pmut_6_G	26	314	id_uc001bwo.2_551	WTTRUB1_pmut_6_G	0.0828025
id_uc001bwo.2_551_WTTRUB1_pmut_7_A	3	374	id_uc001bwo.2_551	WTTRUB1_pmut_7_A	0.00802139
id_uc001bwo.2_551_WTTRUB1_pmut_7_C	30	241	id_uc001bwo.2_551	WTTRUB1_pmut_7_C	0.124481
id_uc001bwo.2_551_WTTRUB1_pmut_7_G	9	383	id_uc001bwo.2_551	WTTRUB1_pmut_7_G	0.0234987
id_uc001bwo.2_551_WTTRUB1_pmut_8_A	0	296	id_uc001bwo.2_551	WTTRUB1_pmut_8_A	0
id_uc001bwo.2_551_WTTRUB1_pmut_8_G	0	207	id_uc001bwo.2_551	WTTRUB1_pmut_8_G	0
id_uc001bwo.2_551_WTTRUB1_pmut_8_T	19	202	id_uc001bwo.2_551	WTTRUB1_pmut_8_T	0.0940594
id_uc001bwp.2_550_WT	38	452	id_uc001bwp.2_550	WT	0.0840708
id_uc001bza.3_3267_WT	22	1126	id_uc001bza.3_3267	WT	0.0195382
id_uc001bza.3_3267_WT_pmut_0_C	13	1161	id_uc001bza.3_3267	WT_pmut_0_C	0.0111972
id_uc001bzf.2_953_WT	249	786	id_uc001bzf.2_953	WT	0.316794
id_uc001bzf.2_953_WT_disruptallCompPos_Restore_6_pos_ExtendLoop80T	86	1582	id_uc001bzf.2_953	WT_disruptallCompPos_Restore_6_pos_ExtendLoop80T	0.0543616
id_uc001bzf.2_953_WT_disruptallCompPos_Restore_6_pos_ExtendLoop80TT	49	1478	id_uc001bzf.2_953	WT_disruptallCompPos_Restore_6_pos_ExtendLoop80TT	0.0331529
id_uc001bzf.2_953_WT_pmut_0_C	8	721	id_uc001bzf.2_953	WT_pmut_0_C	0.0110957
id_uc001bzf.2_953_WTTRUB1_DecreaseLoop6	38	1142	id_uc001bzf.2_953	WTTRUB1_DecreaseLoop6	0.033275
id_uc001bzf.2_953_WTTRUB1_disrupt3	25	1218	id_uc001bzf.2_953	WTTRUB1_disrupt3	0.0205255
id_uc001bzf.2_953_WTTRUB1_disruptallCompPos	34	921	id_uc001bzf.2_953	WTTRUB1_disruptallCompPos	0.0369164
id_uc001bzf.2_953_WTTRUB1_disruptallCompPos_Restore_1_pos	56	1705	id_uc001bzf.2_953	WTTRUB1_disruptallCompPos_Restore_1_pos	0.0328446
id_uc001bzf.2_953_WTTRUB1_disruptallCompPos_Restore_2_pos	38	664	id_uc001bzf.2_953	WTTRUB1_disruptallCompPos_Restore_2_pos	0.0572289
id_uc001bzf.2_953_WTTRUB1_disruptallCompPos_Restore_3_pos	346	1300	id_uc001bzf.2_953	WTTRUB1_disruptallCompPos_Restore_3_pos	0.266154
id_uc001bzf.2_953_WTTRUB1_disruptallCompPos_Restore_4_pos	596	1220	id_uc001bzf.2_953	WTTRUB1_disruptallCompPos_Restore_4_pos	0.488525
id_uc001bzf.2_953_WTTRUB1_disruptallCompPos_Restore_5_pos	782	1573	id_uc001bzf.2_953	WTTRUB1_disruptallCompPos_Restore_5_pos	0.497139
id_uc001bzf.2_953_WTTRUB1_disruptCompPos_-5	53	1002	id_uc001bzf.2_953	WTTRUB1_disruptCompPos_-5	0.0528942
id_uc001bzf.2_953_WTTRUB1_disruptCompPos_-6	174	1883	id_uc001bzf.2_953	WTTRUB1_disruptCompPos_-6	0.0924057
id_uc001bzf.2_953_WTTRUB1_ExtendLoop80C	52	2253	id_uc001bzf.2_953	WTTRUB1_ExtendLoop80C	0.0230803
id_uc001bzf.2_953_WTTRUB1_ExtendLoop80T	45	1441	id_uc001bzf.2_953	WTTRUB1_ExtendLoop80T	0.0312283
id_uc001bzf.2_953_WTTRUB1_ExtendLoop80TT	11	1504	id_uc001bzf.2_953	WTTRUB1_ExtendLoop80TT	0.00731383
id_uc001bzf.2_953_WTTRUB1_newbc	806	1677	id_uc001bzf.2_953	WTTRUB1_newbc	0.48062
id_uc001bzf.2_953_WTTRUB1_pmut_0_A	18	1090	id_uc001bzf.2_953	WTTRUB1_pmut_0_A	0.0165138
id_uc001bzf.2_953_WTTRUB1_pmut_0_G	5	1111	id_uc001bzf.2_953	WTTRUB1_pmut_0_G	0.00450045
id_uc001bzf.2_953_WTTRUB1_pmut_-1_A	31	1102	id_uc001bzf.2_953	WTTRUB1_pmut_-1_A	0.0281307
id_uc001bzf.2_953_WTTRUB1_pmut_1_A	291	980	id_uc001bzf.2_953	WTTRUB1_pmut_1_A	0.296939
id_uc001bzf.2_953_WTTRUB1_pmut_-1_C	0	467	id_uc001bzf.2_953	WTTRUB1_pmut_-1_C	0
id_uc001bzf.2_953_WTTRUB1_pmut_-1_G	19	1053	id_uc001bzf.2_953	WTTRUB1_pmut_-1_G	0.0180437
id_uc001bzf.2_953_WTTRUB1_pmut_1_G	59	1185	id_uc001bzf.2_953	WTTRUB1_pmut_1_G	0.049789
id_uc001bzf.2_953_WTTRUB1_pmut_1_T	73	1227	id_uc001bzf.2_953	WTTRUB1_pmut_1_T	0.0594947
id_uc001bzf.2_953_WTTRUB1_pmut_-2_A	28	583	id_uc001bzf.2_953	WTTRUB1_pmut_-2_A	0.0480274
id_uc001bzf.2_953_WTTRUB1_pmut_2_A	275	945	id_uc001bzf.2_953	WTTRUB1_pmut_2_A	0.291005
id_uc001bzf.2_953_WTTRUB1_pmut_-2_C	22	1995	id_uc001bzf.2_953	WTTRUB1_pmut_-2_C	0.0110276
id_uc001bzf.2_953_WTTRUB1_pmut_2_C	289	1081	id_uc001bzf.2_953	WTTRUB1_pmut_2_C	0.267345
id_uc001bzf.2_953_WTTRUB1_pmut_-2_T	62	1424	id_uc001bzf.2_953	WTTRUB1_pmut_-2_T	0.0435393
id_uc001bzf.2_953_WTTRUB1_pmut_2_T	270	710	id_uc001bzf.2_953	WTTRUB1_pmut_2_T	0.380282
id_uc001bzf.2_953_WTTRUB1_pmut_3_C	26	1244	id_uc001bzf.2_953	WTTRUB1_pmut_3_C	0.0209003
id_uc001bzf.2_953_WTTRUB1_pmut_3_G	13	1250	id_uc001bzf.2_953	WTTRUB1_pmut_3_G	0.0104
id_uc001bzf.2_953_WTTRUB1_pmut_3_T	20	929	id_uc001bzf.2_953	WTTRUB1_pmut_3_T	0.0215285
id_uc001bzf.2_953_WTTRUB1_pmut_4_C	429	1774	id_uc001bzf.2_953	WTTRUB1_pmut_4_C	0.241826
id_uc001bzf.2_953_WTTRUB1_pmut_4_G	223	1729	id_uc001bzf.2_953	WTTRUB1_pmut_4_G	0.128976
id_uc001bzf.2_953_WTTRUB1_pmut_4_T	401	944	id_uc001bzf.2_953	WTTRUB1_pmut_4_T	0.424788
id_uc001bzf.2_953_WTTRUB1_pmut_5_A	58	1416	id_uc001bzf.2_953	WTTRUB1_pmut_5_A	0.0409605
id_uc001bzf.2_953_WTTRUB1_pmut_5_C	233	832	id_uc001bzf.2_953	WTTRUB1_pmut_5_C	0.280048
id_uc001bzf.2_953_WTTRUB1_pmut_5_G	11	1520	id_uc001bzf.2_953	WTTRUB1_pmut_5_G	0.00723684
id_uc001bzf.2_953_WTTRUB1_pmut_6_A	32	1475	id_uc001bzf.2_953	WTTRUB1_pmut_6_A	0.0216949
id_uc001bzf.2_953_WTTRUB1_pmut_6_G	50	1067	id_uc001bzf.2_953	WTTRUB1_pmut_6_G	0.0468604
id_uc001bzf.2_953_WTTRUB1_pmut_6_T	22	688	id_uc001bzf.2_953	WTTRUB1_pmut_6_T	0.0319767
id_uc001bzf.2_953_WTTRUB1_pmut_7_C	55	1297	id_uc001bzf.2_953	WTTRUB1_pmut_7_C	0.0424056
id_uc001bzf.2_953_WTTRUB1_pmut_7_G	207	970	id_uc001bzf.2_953	WTTRUB1_pmut_7_G	0.213402
id_uc001bzf.2_953_WTTRUB1_pmut_7_T	9	954	id_uc001bzf.2_953	WTTRUB1_pmut_7_T	0.00943396
id_uc001bzf.2_953_WTTRUB1_pmut_8_A	76	1753	id_uc001bzf.2_953	WTTRUB1_pmut_8_A	0.0433542
id_uc001bzf.2_953_WTTRUB1_pmut_8_C	649	1281	id_uc001bzf.2_953	WTTRUB1_pmut_8_C	0.506635
id_uc001bzf.2_953_WTTRUB1_pmut_8_G	57	1286	id_uc001bzf.2_953	WTTRUB1_pmut_8_G	0.0443235
id_uc001bzv.2_3271_WT_disruptallCompPos_Restore_6_pos_DecreaseLoop6	33	1023	id_uc001bzv.2_3271	WT_disruptallCompPos_Restore_6_pos_DecreaseLoop6	0.0322581
id_uc001bzv.2_3271_WT_disruptallCompPos_Restore_6_pos_ExtendLoop80T	49	688	id_uc001bzv.2_3271	WT_disruptallCompPos_Restore_6_pos_ExtendLoop80T	0.0712209
id_uc001bzv.2_3271_WT_disruptallCompPos_Restore_6_pos_ExtendLoop80TT	29	747	id_uc001bzv.2_3271	WT_disruptallCompPos_Restore_6_pos_ExtendLoop80TT	0.038822
id_uc001bzv.2_3271_WT_pmut_0_C	13	974	id_uc001bzv.2_3271	WT_pmut_0_C	0.013347
id_uc001bzv.2_3271_WTTRUB1_DecreaseLoop6	4	1213	id_uc001bzv.2_3271	WTTRUB1_DecreaseLoop6	0.00329761
id_uc001bzv.2_3271_WTTRUB1_disrupt3	17	765	id_uc001bzv.2_3271	WTTRUB1_disrupt3	0.0222222
id_uc001bzv.2_3271_WTTRUB1_disruptallCompPos	78	1890	id_uc001bzv.2_3271	WTTRUB1_disruptallCompPos	0.0412698
id_uc001bzv.2_3271_WTTRUB1_disruptallCompPos_Restore_1_pos	32	1282	id_uc001bzv.2_3271	WTTRUB1_disruptallCompPos_Restore_1_pos	0.024961
id_uc001bzv.2_3271_WTTRUB1_disruptallCompPos_Restore_2_pos	27	835	id_uc001bzv.2_3271	WTTRUB1_disruptallCompPos_Restore_2_pos	0.0323353
id_uc001bzv.2_3271_WTTRUB1_disruptallCompPos_Restore_3_pos	45	1916	id_uc001bzv.2_3271	WTTRUB1_disruptallCompPos_Restore_3_pos	0.0234864
id_uc001bzv.2_3271_WTTRUB1_disruptallCompPos_Restore_5_pos	36	1027	id_uc001bzv.2_3271	WTTRUB1_disruptallCompPos_Restore_5_pos	0.0350536
id_uc001bzv.2_3271_WTTRUB1_disruptallCompPos_Restore_6_pos	24	1256	id_uc001bzv.2_3271	WTTRUB1_disruptallCompPos_Restore_6_pos	0.0191083
id_uc001bzv.2_3271_WTTRUB1_disruptCompPos_-5	59	1671	id_uc001bzv.2_3271	WTTRUB1_disruptCompPos_-5	0.0353082
id_uc001bzv.2_3271_WTTRUB1_disruptCompPos_-6	87	1707	id_uc001bzv.2_3271	WTTRUB1_disruptCompPos_-6	0.0509666
id_uc001bzv.2_3271_WTTRUB1_ExtendLoop80C	17	686	id_uc001bzv.2_3271	WTTRUB1_ExtendLoop80C	0.0247813
id_uc001bzv.2_3271_WTTRUB1_ExtendLoop80TT	62	1504	id_uc001bzv.2_3271	WTTRUB1_ExtendLoop80TT	0.0412234
id_uc001bzv.2_3271_WTTRUB1_newbc	39	1284	id_uc001bzv.2_3271	WTTRUB1_newbc	0.0303738
id_uc001bzv.2_3271_WTTRUB1_pmut_0_A	27	1190	id_uc001bzv.2_3271	WTTRUB1_pmut_0_A	0.0226891
id_uc001bzv.2_3271_WTTRUB1_pmut_0_G	24	1832	id_uc001bzv.2_3271	WTTRUB1_pmut_0_G	0.0131004
id_uc001bzv.2_3271_WTTRUB1_pmut_-1_A	19	1428	id_uc001bzv.2_3271	WTTRUB1_pmut_-1_A	0.0133053
id_uc001bzv.2_3271_WTTRUB1_pmut_1_A	63	1784	id_uc001bzv.2_3271	WTTRUB1_pmut_1_A	0.0353139
id_uc001bzv.2_3271_WTTRUB1_pmut_-1_C	14	1356	id_uc001bzv.2_3271	WTTRUB1_pmut_-1_C	0.0103245
id_uc001bzv.2_3271_WTTRUB1_pmut_-1_G	17	1104	id_uc001bzv.2_3271	WTTRUB1_pmut_-1_G	0.0153986
id_uc001bzv.2_3271_WTTRUB1_pmut_1_G	9	876	id_uc001bzv.2_3271	WTTRUB1_pmut_1_G	0.010274
id_uc001bzv.2_3271_WTTRUB1_pmut_1_T	37	854	id_uc001bzv.2_3271	WTTRUB1_pmut_1_T	0.0433255
id_uc001bzv.2_3271_WTTRUB1_pmut_-2_A	12	920	id_uc001bzv.2_3271	WTTRUB1_pmut_-2_A	0.0130435
id_uc001bzv.2_3271_WTTRUB1_pmut_2_A	76	1377	id_uc001bzv.2_3271	WTTRUB1_pmut_2_A	0.0551924
id_uc001bzv.2_3271_WTTRUB1_pmut_-2_C	21	689	id_uc001bzv.2_3271	WTTRUB1_pmut_-2_C	0.030479
id_uc001bzv.2_3271_WTTRUB1_pmut_2_C	106	1620	id_uc001bzv.2_3271	WTTRUB1_pmut_2_C	0.0654321
id_uc001bzv.2_3271_WTTRUB1_pmut_-2_T	6	723	id_uc001bzv.2_3271	WTTRUB1_pmut_-2_T	0.00829876
id_uc001bzv.2_3271_WTTRUB1_pmut_3_C	22	1309	id_uc001bzv.2_3271	WTTRUB1_pmut_3_C	0.0168067
id_uc001bzv.2_3271_WTTRUB1_pmut_3_G	52	1340	id_uc001bzv.2_3271	WTTRUB1_pmut_3_G	0.038806
id_uc001bzv.2_3271_WTTRUB1_pmut_3_T	57	1162	id_uc001bzv.2_3271	WTTRUB1_pmut_3_T	0.0490534
id_uc001bzv.2_3271_WTTRUB1_pmut_4_G	37	2129	id_uc001bzv.2_3271	WTTRUB1_pmut_4_G	0.0173791
id_uc001bzv.2_3271_WTTRUB1_pmut_4_T	30	1030	id_uc001bzv.2_3271	WTTRUB1_pmut_4_T	0.0291262
id_uc001bzv.2_3271_WTTRUB1_pmut_5_A	72	1249	id_uc001bzv.2_3271	WTTRUB1_pmut_5_A	0.0576461
id_uc001bzv.2_3271_WTTRUB1_pmut_5_C	549	1086	id_uc001bzv.2_3271	WTTRUB1_pmut_5_C	0.505525
id_uc001bzv.2_3271_WTTRUB1_pmut_5_T	547	1497	id_uc001bzv.2_3271	WTTRUB1_pmut_5_T	0.365397
id_uc001bzv.2_3271_WTTRUB1_pmut_6_A	53	967	id_uc001bzv.2_3271	WTTRUB1_pmut_6_A	0.0548087
id_uc001bzv.2_3271_WTTRUB1_pmut_6_G	66	702	id_uc001bzv.2_3271	WTTRUB1_pmut_6_G	0.0940171
id_uc001bzv.2_3271_WTTRUB1_pmut_6_T	41	843	id_uc001bzv.2_3271	WTTRUB1_pmut_6_T	0.0486358
id_uc001bzv.2_3271_WTTRUB1_pmut_7_C	55	1376	id_uc001bzv.2_3271	WTTRUB1_pmut_7_C	0.0399709
id_uc001bzv.2_3271_WTTRUB1_pmut_7_G	27	807	id_uc001bzv.2_3271	WTTRUB1_pmut_7_G	0.0334572
id_uc001bzv.2_3271_WTTRUB1_pmut_7_T	11	1053	id_uc001bzv.2_3271	WTTRUB1_pmut_7_T	0.0104463
id_uc001bzv.2_3271_WTTRUB1_pmut_8_A	94	1929	id_uc001bzv.2_3271	WTTRUB1_pmut_8_A	0.0487299
id_uc001bzv.2_3271_WTTRUB1_pmut_8_C	51	1559	id_uc001bzv.2_3271	WTTRUB1_pmut_8_C	0.0327133
id_uc001bzv.2_3271_WTTRUB1_pmut_8_T	97	1090	id_uc001bzv.2_3271	WTTRUB1_pmut_8_T	0.0889908
id_uc001ccy.3_62_WT	31	2265	id_uc001ccy.3_62	WT	0.0136865
id_uc001ccy.3_62_WT_pmut_0_C	29	2354	id_uc001ccy.3_62	WT_pmut_0_C	0.0123195
id_uc001cdl.2_2101_WT	232	1795	id_uc001cdl.2_2101	WT	0.129248
id_uc001cdl.2_2101_WT_disruptallCompPos_Restore_6_pos_DecreaseLoop6	64	1987	id_uc001cdl.2_2101	WT_disruptallCompPos_Restore_6_pos_DecreaseLoop6	0.0322094
id_uc001cdl.2_2101_WT_disruptallCompPos_Restore_6_pos_ExtendLoop80T	146	2512	id_uc001cdl.2_2101	WT_disruptallCompPos_Restore_6_pos_ExtendLoop80T	0.058121
id_uc001cdl.2_2101_WT_disruptallCompPos_Restore_6_pos_ExtendLoop80TT	46	1707	id_uc001cdl.2_2101	WT_disruptallCompPos_Restore_6_pos_ExtendLoop80TT	0.0269479
id_uc001cdl.2_2101_WT_pmut_0_C	8	2352	id_uc001cdl.2_2101	WT_pmut_0_C	0.00340136
id_uc001cdl.2_2101_WTTRUB1_DecreaseLoop6	35	1832	id_uc001cdl.2_2101	WTTRUB1_DecreaseLoop6	0.0191048
id_uc001cdl.2_2101_WTTRUB1_disrupt3	3	1461	id_uc001cdl.2_2101	WTTRUB1_disrupt3	0.00205339
id_uc001cdl.2_2101_WTTRUB1_disrupt3_RestoreGU	421	1471	id_uc001cdl.2_2101	WTTRUB1_disrupt3_RestoreGU	0.2862
id_uc001cdl.2_2101_WTTRUB1_disruptallCompPos	24	1872	id_uc001cdl.2_2101	WTTRUB1_disruptallCompPos	0.0128205
id_uc001cdl.2_2101_WTTRUB1_disruptallCompPos_Restore_1_pos	29	1999	id_uc001cdl.2_2101	WTTRUB1_disruptallCompPos_Restore_1_pos	0.0145073
id_uc001cdl.2_2101_WTTRUB1_disruptallCompPos_Restore_2_pos	55	2069	id_uc001cdl.2_2101	WTTRUB1_disruptallCompPos_Restore_2_pos	0.0265829
id_uc001cdl.2_2101_WTTRUB1_disruptallCompPos_Restore_3_pos	388	2065	id_uc001cdl.2_2101	WTTRUB1_disruptallCompPos_Restore_3_pos	0.187893
id_uc001cdl.2_2101_WTTRUB1_disruptallCompPos_Restore_4_pos	390	1766	id_uc001cdl.2_2101	WTTRUB1_disruptallCompPos_Restore_4_pos	0.220838
id_uc001cdl.2_2101_WTTRUB1_disruptallCompPos_Restore_5_pos	221	793	id_uc001cdl.2_2101	WTTRUB1_disruptallCompPos_Restore_5_pos	0.278689
id_uc001cdl.2_2101_WTTRUB1_disruptallCompPos_Restore_6_pos	569	1723	id_uc001cdl.2_2101	WTTRUB1_disruptallCompPos_Restore_6_pos	0.330238
id_uc001cdl.2_2101_WTTRUB1_disruptCompPos_-5	375	2504	id_uc001cdl.2_2101	WTTRUB1_disruptCompPos_-5	0.14976
id_uc001cdl.2_2101_WTTRUB1_ExtendLoop80C	49	1756	id_uc001cdl.2_2101	WTTRUB1_ExtendLoop80C	0.0279043
id_uc001cdl.2_2101_WTTRUB1_ExtendLoop80TT	29	829	id_uc001cdl.2_2101	WTTRUB1_ExtendLoop80TT	0.0349819
id_uc001cdl.2_2101_WTTRUB1_newbc	115	1306	id_uc001cdl.2_2101	WTTRUB1_newbc	0.0880551
id_uc001cdl.2_2101_WTTRUB1_pmut_0_A	4	2806	id_uc001cdl.2_2101	WTTRUB1_pmut_0_A	0.00142552
id_uc001cdl.2_2101_WTTRUB1_pmut_0_G	0	2856	id_uc001cdl.2_2101	WTTRUB1_pmut_0_G	0
id_uc001cdl.2_2101_WTTRUB1_pmut_-1_A	4	1786	id_uc001cdl.2_2101	WTTRUB1_pmut_-1_A	0.00223964
id_uc001cdl.2_2101_WTTRUB1_pmut_1_A	53	1141	id_uc001cdl.2_2101	WTTRUB1_pmut_1_A	0.0464505
id_uc001cdl.2_2101_WTTRUB1_pmut_-1_C	0	2079	id_uc001cdl.2_2101	WTTRUB1_pmut_-1_C	0
id_uc001cdl.2_2101_WTTRUB1_pmut_-1_G	7	2530	id_uc001cdl.2_2101	WTTRUB1_pmut_-1_G	0.0027668
id_uc001cdl.2_2101_WTTRUB1_pmut_1_G	19	1834	id_uc001cdl.2_2101	WTTRUB1_pmut_1_G	0.0103599
id_uc001cdl.2_2101_WTTRUB1_pmut_1_T	44	3190	id_uc001cdl.2_2101	WTTRUB1_pmut_1_T	0.0137931
id_uc001cdl.2_2101_WTTRUB1_pmut_-2_A	0	2775	id_uc001cdl.2_2101	WTTRUB1_pmut_-2_A	0
id_uc001cdl.2_2101_WTTRUB1_pmut_2_A	135	1377	id_uc001cdl.2_2101	WTTRUB1_pmut_2_A	0.0980392
id_uc001cdl.2_2101_WTTRUB1_pmut_-2_C	35	1972	id_uc001cdl.2_2101	WTTRUB1_pmut_-2_C	0.0177485
id_uc001cdl.2_2101_WTTRUB1_pmut_2_G	117	2237	id_uc001cdl.2_2101	WTTRUB1_pmut_2_G	0.0523022
id_uc001cdl.2_2101_WTTRUB1_pmut_-2_T	12	1676	id_uc001cdl.2_2101	WTTRUB1_pmut_-2_T	0.0071599
id_uc001cdl.2_2101_WTTRUB1_pmut_2_T	89	3078	id_uc001cdl.2_2101	WTTRUB1_pmut_2_T	0.0289149
id_uc001cdl.2_2101_WTTRUB1_pmut_3_C	0	2339	id_uc001cdl.2_2101	WTTRUB1_pmut_3_C	0
id_uc001cdl.2_2101_WTTRUB1_pmut_3_G	7	1191	id_uc001cdl.2_2101	WTTRUB1_pmut_3_G	0.00587741
id_uc001cdl.2_2101_WTTRUB1_pmut_3_T	12	1000	id_uc001cdl.2_2101	WTTRUB1_pmut_3_T	0.012
id_uc001cdl.2_2101_WTTRUB1_pmut_4_A	604	1726	id_uc001cdl.2_2101	WTTRUB1_pmut_4_A	0.349942
id_uc001cdl.2_2101_WTTRUB1_pmut_4_C	44	2377	id_uc001cdl.2_2101	WTTRUB1_pmut_4_C	0.0185107
id_uc001cdl.2_2101_WTTRUB1_pmut_4_T	167	699	id_uc001cdl.2_2101	WTTRUB1_pmut_4_T	0.238913
id_uc001cdl.2_2101_WTTRUB1_pmut_5_A	76	1441	id_uc001cdl.2_2101	WTTRUB1_pmut_5_A	0.0527412
id_uc001cdl.2_2101_WTTRUB1_pmut_5_G	17	1384	id_uc001cdl.2_2101	WTTRUB1_pmut_5_G	0.0122832
id_uc001cdl.2_2101_WTTRUB1_pmut_5_T	168	1737	id_uc001cdl.2_2101	WTTRUB1_pmut_5_T	0.0967185
id_uc001cdl.2_2101_WTTRUB1_pmut_6_A	34	1668	id_uc001cdl.2_2101	WTTRUB1_pmut_6_A	0.0203837
id_uc001cdl.2_2101_WTTRUB1_pmut_6_G	82	2421	id_uc001cdl.2_2101	WTTRUB1_pmut_6_G	0.0338703
id_uc001cdl.2_2101_WTTRUB1_pmut_6_T	38	1741	id_uc001cdl.2_2101	WTTRUB1_pmut_6_T	0.0218265
id_uc001cdl.2_2101_WTTRUB1_pmut_7_A	16	1939	id_uc001cdl.2_2101	WTTRUB1_pmut_7_A	0.00825168
id_uc001cdl.2_2101_WTTRUB1_pmut_7_C	19	1659	id_uc001cdl.2_2101	WTTRUB1_pmut_7_C	0.0114527
id_uc001cdl.2_2101_WTTRUB1_pmut_7_G	26	2960	id_uc001cdl.2_2101	WTTRUB1_pmut_7_G	0.00878378
id_uc001cdl.2_2101_WTTRUB1_pmut_8_A	51	1995	id_uc001cdl.2_2101	WTTRUB1_pmut_8_A	0.0255639
id_uc001cdl.2_2101_WTTRUB1_pmut_8_C	119	2582	id_uc001cdl.2_2101	WTTRUB1_pmut_8_C	0.0460883
[truncated: 5,804 more rows]

## Sheet: MPRA_Input
id	# reads beginning	# reads overlapping	PseudoUposition_id	mutgroup	psi ratio
[truncated: 4,695 more rows]
